# Supplementary material for: Extraction of active RhoGTPases by RhoGDI regulates spatiotemporal patterning of RhoGTPases
Source: eLife. 2019 Oct 24;8:e50471. doi: 10.7554/eLife.50471 (PMC6910828; doi:10.7554/eLife.50471)
Supplement: Figure 1—figure supplement 1—source data 1. [file elife-50471-fig1-figsupp1-data1.xlsx]

## Sheet: mCh-Cdc42, wGBD
	mCh-Cdc42	Active Cdc42
0	0.392818	0.0975054
0.1923	0.366935	0.0993155
0.3846	0.382102	0.053766
0.5769	0.403505	0.0314005
0.7692	0.376754	0.0315878
0.9615	0.342075	0.0712643
1.1538	0.357425	0.106234
1.3462	0.345961	0.0881924
1.5385	0.376213	0.0721112
1.7308	0.371146	0.056423
1.9231	0.361325	0.0222449
2.1154	0.315814	0.0479441
2.3077	0.361482	0.0271575
2.5	0.433456	0.0537334
2.6923	0.437895	0.0262993
2.8846	0.345678	0.0322942
3.0769	0.241578	0.0540171
3.2692	0.24397	0.0210788
3.4615	0.270384	0.0225528
3.6538	0.305339	0.005036
3.8462	0.314649	0.0856502
4.0385	0.335939	0.109904
4.2308	0.33598	0.164199
4.4231	0.373157	0.184434
4.6154	0.422621	0.162074
4.8077	0.423072	0.155171
5	0.370993	0.159067
5.1923	0.327845	0.249852
5.3846	0.348967	0.193856
5.5769	0.397777	0.143693
5.7692	0.41585	0.127155
5.9615	0.468206	0.242578
6.1538	0.459965	0.265962
6.3462	0.518341	0.328815
6.5385	0.524207	0.309149
6.7308	0.58374	0.37213
6.9231	0.54345	0.285538
7.1154	0.511299	0.222461
7.3077	0.468254	0.277303
7.5	0.482292	0.287662
7.6923	0.488142	0.395817
7.8846	0.402179	0.329993
8.0769	0.362078	0.328987
8.2692	0.4148	0.303079
8.4615	0.48682	0.308335
8.6538	0.547059	0.389162
8.8462	0.517777	0.375816
9.0385	0.491999	0.379608
9.2308	0.438225	0.321753
9.4231	0.492288	0.327968
9.6154	0.562712	0.35677
9.8077	0.593682	0.363051
10	0.549472	0.404385
10.1923	0.526125	0.448669
10.3846	0.547886	0.508917
10.5769	0.502316	0.505857
10.7692	0.57982	0.471493
10.9615	0.578523	0.472795
11.1538	0.727452	0.537168
11.3462	0.728691	0.649278
11.5385	0.824417	0.706254
11.7308	0.827076	0.716454
11.9231	0.782876	0.72512
12.1154	0.688686	0.727592
12.3077	0.683428	0.723598
12.5	0.756208	0.75676
12.6923	0.853913	0.784747
12.8846	0.834079	0.887177
13.0769	0.785495	0.916327
13.2692	0.739724	0.903671
13.4615	0.719262	0.875178
13.6538	0.7874	0.889187
13.8462	0.787739	0.971052
14.0385	0.816164	1
14.2308	0.82804	0.903561
14.4231	0.854935	0.789457
14.6154	0.848887	0.729093
14.8077	0.794347	0.774721
15	0.803698	0.856163
15.1923	0.816932	0.938305
15.3846	0.790726	0.977582
15.5769	0.767816	0.935681
15.7692	0.770274	0.819344
15.9615	0.803034	0.699011
16.1538	0.820359	0.585712
16.3462	0.776888	0.471999
16.5385	0.765878	0.382573
16.7308	0.797106	0.339894
16.9231	0.848807	0.360153
17.1154	0.813706	0.371282
17.3077	0.763431	0.39469
17.5	0.663689	0.36954
17.6923	0.650866	0.326808
17.8846	0.607924	0.262236
18.0769	0.668853	0.244721
18.2692	0.717298	0.269599
18.4615	0.752772	0.306721
18.6538	0.727107	0.331167
18.8462	0.658083	0.299147
19.0385	0.60889	0.265275
19.2308	0.570351	0.231385
19.4231	0.553081	0.240157
19.6154	0.524447	0.218667
19.8077	0.546252	0.183997
20	0.519599	0.186522
20.1923	0.501807	0.208591
20.3846	0.426217	0.245599
20.5769	0.415022	0.213721
20.7692	0.394244	0.1675
20.9615	0.353472	0.115022
21.1538	0.33288	0.139402
21.3462	0.342776	0.156401
21.5385	0.325652	0.14858
21.7308	0.290585	0.112903
21.9231	0.304935	0.120516
22.1154	0.351425	0.141093
22.3077	0.328414	0.161919
22.5	0.247751	0.172986
22.6923	0.175616	0.172123
22.8846	0.18739	0.174965
23.0769	0.241278	0.149918
23.2692	0.260065	0.166825
23.4615	0.260001	0.202929
23.6538	0.178374	0.228023
23.8462	0.181927	0.181209
24.0385	0.134664	0.0957081
24.2308	0.159823	0.0611796
24.4231	0.110456	0.0944327
24.6154	0.136147	0.109037
24.8077	0.124411	0.10584
25	0.164801	0.0776125
25.1923	0.153743	0.0740731
25.3846	0.145296	0.1172
25.5769	0.125159	0.129761
25.7692	0.127594	0.136341
25.9615	0.102911	0.132318
26.1538	0.0746583	0.147898
26.3462	0.0734458	0.169519
26.5385	0.114325	0.166327
26.7308	0.211505	0.14809
26.9231	0.199327	0.109417
27.1154	0.170276	0.0915119
27.3077	0.0685037	0.109112
27.5	0.0389588	0.0869199
27.6923	0	0.0666723
27.8846	0.00496399	0.125314
28.0769	0.0291668	0.155478
28.2692	0.0857925	0.120468
28.4615	0.0838676	0.0510792
28.6538	0.144245	0.0181282
28.8462	0.100855	0.0227627
29.0385	0.16047	0
29.2308	0.150596	0.0712289
29.4231	0.173643	0.169971
29.6154	0.165313	0.27874
29.8077	0.14772	0.253518
30	0.183343	0.208693
30.1923	0.223742	0.170969
30.3846	0.229526	0.193334
30.5769	0.272082	0.194643
30.7692	0.229881	0.181731
30.9615	0.226448	0.217361
31.1538	0.17399	0.210866
31.3462	0.151718	0.236078
31.5385	0.1035	0.233236
31.7308	0.0628647	0.23356
31.9231	0.0759349	0.207475
32.1154	0.0980596	0.148595
32.3077	0.123742	0.137609
32.5	0.122515	0.209676
32.6923	0.13397	0.247031
32.8846	0.115676	0.25672
33.0769	0.0781286	0.180665
33.2692	0.0452603	0.157296
33.4615	0.0670881	0.146035
33.6538	0.10118	0.135534
33.8462	0.0850144	0.0857311
34.0385	0.0697975	0.0545902
34.2308	0.0440291	0.0398709
34.4231	0.08693	0.087588
34.6154	0.0837504	0.113703
34.8077	0.103525	0.120651
35	0.0797145	0.120906
35.1923	0.0945737	0.159651
35.3846	0.0597273	0.200366
35.5769	0.0646897	0.184143
35.7692	0.081102	0.172109
35.9615	0.0970768	0.174065
36.1538	0.0573945	0.21648
36.3462	0.0699912	0.238032
36.5385	0.0502055	0.163887
36.7308	0.0760161	0.217023
36.9231	0.0459384	0.22927
37.1154	0.0715131	0.290126
37.3077	0.090744	0.229685
37.5	0.0895331	0.181195
37.6923	0.096433	0.148898
37.8846	0.0578898	0.100124
38.0769	0.0407104	0.107559
38.2692	0.0724521	0.113361
38.4615	0.139506	0.162148
38.6538	0.139865	0.216905
38.8462	0.078577	0.225936
39.0385	0.0172279	0.222997
39.2308	0.0724271	0.108585
39.4231	0.107545	0.0939462
39.6154	0.153276	0.126609
39.8077	0.118708	0.178625
40	0.10503	0.160933
40.1923	0.138956	0.10921
40.3846	0.200505	0.130766
40.5769	0.245072	0.185159
40.7692	0.201882	0.214614
40.9615	0.159813	0.18747
41.1538	0.0841535	0.151613
41.3462	0.0622554	0.138599
41.5385	0.00962799	0.129602
41.7308	0.00741708	0.162436
41.9231	0.0616132	0.152079
42.1154	0.085955	0.148234
42.3077	0.11328	0.114048
42.5	0.126144	0.123175
42.6923	0.139259	0.15492
42.8846	0.142957	0.167049
43.0769	0.147096	0.16838
43.2692	0.132201	0.181577
43.4615	0.0995939	0.231945
43.6538	0.0247934	0.252901
43.8462	0.0317824	0.233456
44.0385	0.0550258	0.206035
44.2308	0.117314	0.228772
44.4231	0.178749	0.274906
44.6154	0.191989	0.290471
44.8077	0.20893	0.247233
45	0.211317	0.179497
45.1923	0.178616	0.110249
45.3846	0.129839	0.135088
45.5769	0.0756146	0.192375
45.7692	0.124508	0.290803
45.9615	0.179449	0.289401
46.1538	0.244237	0.312171
46.3462	0.28976	0.369012
46.5385	0.37321	0.418244
46.7308	0.39849	0.428997
46.9231	0.446544	0.439837
47.1154	0.464676	0.497759
47.3077	0.494924	0.573633
47.5	0.479985	0.538805
47.6923	0.470834	0.46277
47.8846	0.450209	0.35125
48.0769	0.418911	0.304569
48.2692	0.388971	0.298935
48.4615	0.354373	0.333779
48.6538	0.359026	0.355246
48.8462	0.413066	0.365798
49.0385	0.537227	0.340055
49.2308	0.588176	0.272908
49.4231	0.612477	0.243132
49.6154	0.583412	0.286994
49.8077	0.566192	0.35715
50	0.562016	0.372708
50.1923	0.52911	0.343658
50.3846	0.578718	0.303368
50.5769	0.575629	0.274256
50.7692	0.626838	0.221985
50.9615	0.600301	0.254051
51.1538	0.599803	0.294698
51.3462	0.59084	0.383141
51.5385	0.587171	0.394348
51.7308	0.571762	0.450695
51.9231	0.598024	0.470071
52.1154	0.684164	0.496149
52.3077	0.760625	0.484941
52.5	0.74981	0.471796
52.6923	0.746738	0.523891
52.8846	0.770931	0.56792
53.0769	0.819699	0.668717
53.2692	0.811835	0.738191
53.4615	0.83442	0.761573
53.6538	0.801028	0.758952
53.8462	0.780547	0.79465
54.0385	0.789767	0.901885
54.2308	0.869964	0.984552
54.4231	0.911678	0.956849
54.6154	0.93241	0.856012
54.8077	0.894148	0.818889
55	0.889417	0.800819
55.1923	0.813051	0.862706
55.3846	0.844926	0.873619
55.5769	0.849229	0.925952
55.7692	0.842748	0.918753
55.9615	0.781658	0.963576
56.1538	0.860693	0.929168
56.3462	0.947923	0.917715
56.5385	1	0.893031
56.7308	0.868657	0.846655
56.9231	0.781856	0.780578
57.1154	0.761477	0.636221
57.3077	0.753135	0.551595
57.5	0.753541	0.494197
57.6923	0.733063	0.529157
57.8846	0.73453	0.53466
58.0769	0.727484	0.538351
58.2692	0.654816	0.495275
58.4615	0.618243	0.462455
58.6538	0.57115	0.392257
58.8462	0.541808	0.322359
59.0385	0.56443	0.332824
59.2308	0.592229	0.332811
59.4231	0.600501	0.366196
59.6154	0.574598	0.329195
59.8077	0.531436	0.392788
60	0.530905	0.430168
60.1923	0.482473	0.445409
60.3846	0.465609	0.366653
60.5769	0.455373	0.290662
60.7692	0.510951	0.258403
60.9615	0.534658	0.257304
61.1538	0.519594	0.286601
61.3462	0.510677	0.30864
61.5385	0.512804	0.298296
61.7308	0.524216	0.23496
61.9231	0.570503	0.210437
62.1154	0.553634	0.17814
62.3077	0.575964	0.140266
62.5	0.536339	0.159791
62.6923	0.598156	0.219741
62.8846	0.552386	0.300497
63.0769	0.474278	0.271094
63.2692	0.420263	0.220914
63.4615	0.421268	0.202375
63.6538	0.44543	0.19293
63.8462	0.419358	0.167626
64.0385	0.398866	0.100097
64.2308	0.455865	0.0479384
64.4231	0.444661	0.142232
64.6154	0.422035	0.182609
64.8077	0.369115	0.208218
65	0.388095	0.111694
65.1923	0.403863	0.0876448
65.3846	0.369109	0.102993

## Sheet: mCh-Rho, rGBD
	mCh-Rho	Active Rho
0	0.343439	0.067847
0.1923	0.319608	0.0277561
0.3846	0.236565	0.0399092
0.5769	0.231675	0.0524752
0.7692	0.308848	0.0509567
0.9615	0.395716	0.0806837
1.1538	0.353893	0.136664
1.3462	0.256644	0.197012
1.5385	0.233272	0.240533
1.7308	0.221342	0.231807
1.9231	0.257415	0.161576
2.1154	0.355807	0.156598
2.3077	0.365584	0.211722
2.5	0.351621	0.254462
2.6923	0.372758	0.248856
2.8846	0.327635	0.198799
3.0769	0.290824	0.174284
3.2692	0.451287	0.224159
3.4615	0.626005	0.267137
3.6538	0.601927	0.28463
3.8462	0.535408	0.308589
4.0385	0.471057	0.303603
4.2308	0.468427	0.304118
4.4231	0.463408	0.373359
4.6154	0.552274	0.469456
4.8077	0.657712	0.481139
5	0.630837	0.45536
5.1923	0.59136	0.453764
5.3846	0.741904	0.458499
5.5769	0.898443	0.430502
5.7692	0.830753	0.462814
5.9615	0.719161	0.554945
6.1538	0.650643	0.623843
6.3462	0.525712	0.684569
6.5385	0.478638	0.716197
6.7308	0.569143	0.689798
6.9231	0.595871	0.664337
7.1154	0.514646	0.628264
7.3077	0.49545	0.609519
7.5	0.555509	0.681339
7.6923	0.544652	0.789884
7.8846	0.45752	0.817755
8.0769	0.409567	0.826608
8.2692	0.440294	0.859139
8.4615	0.476372	0.947971
8.6538	0.510005	1
8.8462	0.553658	0.971799
9.0385	0.578457	0.898085
9.2308	0.651358	0.770105
9.4231	0.659343	0.699856
9.6154	0.590075	0.655779
9.8077	0.565829	0.640197
10	0.535156	0.659069
10.1923	0.443803	0.638709
10.3846	0.426146	0.599334
10.5769	0.465867	0.554376
10.7692	0.506368	0.502488
10.9615	0.518325	0.501376
11.1538	0.571214	0.498135
11.3462	0.634208	0.46548
11.5385	0.54395	0.370666
11.7308	0.43063	0.311203
11.9231	0.40616	0.287269
12.1154	0.419516	0.246946
12.3077	0.441424	0.18555
12.5	0.463771	0.144623
12.6923	0.398238	0.122007
12.8846	0.333924	0.172654
13.0769	0.309099	0.224608
13.2692	0.280904	0.211797
13.4615	0.331744	0.164251
13.6538	0.449698	0.135386
13.8462	0.422981	0.0783901
14.0385	0.344389	0.072555
14.2308	0.348583	0.168795
14.4231	0.467158	0.251034
14.6154	0.543218	0.248979
14.8077	0.464005	0.246519
15	0.38413	0.295587
15.1923	0.417692	0.338657
15.3846	0.475512	0.30687
15.5769	0.467192	0.188416
15.7692	0.404464	0.0760088
15.9615	0.485281	0.0328123
16.1538	0.614534	0.00755564
16.3462	0.64492	0.0611313
16.5385	0.651557	0.19859
16.7308	0.673294	0.265754
16.9231	0.710314	0.220633
17.1154	0.762378	0.167744
17.3077	0.742193	0.158194
17.5	0.591873	0.158557
17.6923	0.527899	0.164524
17.8846	0.599217	0.155011
18.0769	0.678692	0.106013
18.2692	0.568722	0.0953566
18.4615	0.338752	0.0933895
18.6538	0.159839	0.0891822
18.8462	0.166228	0.0605086
19.0385	0.326589	0.0473835
19.2308	0.55422	0.0666436
19.4231	0.659106	0.131901
19.6154	0.583035	0.124381
19.8077	0.493819	0.0890971
20	0.441569	0.0958661
20.1923	0.348768	0.0922306
20.3846	0.267823	0.0466274
20.5769	0.247254	0.0415751
20.7692	0.250963	0.0530445
20.9615	0.299054	0.0772134
21.1538	0.27963	0.0767191
21.3462	0.237651	0.0247318
21.5385	0.278437	0
21.7308	0.29618	0.0213784
21.9231	0.236458	0.0330664
22.1154	0.205802	0.0907719
22.3077	0.309001	0.160275
22.5	0.531121	0.155564
22.6923	0.718282	0.11819
22.8846	0.718492	0.141135
23.0769	0.525129	0.153624
23.2692	0.431066	0.138162
23.4615	0.486392	0.14253
23.6538	0.53011	0.163412
23.8462	0.534227	0.165826
24.0385	0.562259	0.139376
24.2308	0.578419	0.113371
24.4231	0.589563	0.119931
24.6154	0.562192	0.144163
24.8077	0.530754	0.175636
25	0.601569	0.210715
25.1923	0.629028	0.230551
25.3846	0.556373	0.247164
25.5769	0.582899	0.240562
25.7692	0.66493	0.209258
25.9615	0.743287	0.191551
26.1538	0.85464	0.205667
26.3462	0.972335	0.255719
26.5385	1	0.282664
26.7308	0.94331	0.29807
26.9231	0.929265	0.315591
27.1154	0.978184	0.302293
27.3077	0.99552	0.238895
27.5	0.907822	0.184503
27.6923	0.77078	0.195735
27.8846	0.703975	0.237408
28.0769	0.740908	0.274527
28.2692	0.819144	0.276095
28.4615	0.872231	0.284516
28.6538	0.826573	0.308077
28.8462	0.755358	0.296368
29.0385	0.761712	0.239127
29.2308	0.814136	0.207093
29.4231	0.797497	0.209794
29.6154	0.771413	0.243857
29.8077	0.815144	0.26244
30	0.825535	0.277082
30.1923	0.858902	0.315677
30.3846	0.864281	0.322041
30.5769	0.800789	0.277462
30.7692	0.751521	0.217125
30.9615	0.780478	0.177377
31.1538	0.769916	0.178757
31.3462	0.69776	0.190219
31.5385	0.785699	0.168839
31.7308	0.917242	0.150048
31.9231	0.762791	0.140031
32.1154	0.384128	0.126246
32.3077	0.196989	0.0999565
32.5	0.28729	0.0913958
32.6923	0.408653	0.116797
32.8846	0.475416	0.103268
33.0769	0.551591	0.0633703
33.2692	0.510659	0.0812504
33.4615	0.347655	0.183602
33.6538	0.29265	0.287723
33.8462	0.308707	0.327223
34.0385	0.339628	0.333501
34.2308	0.417128	0.347694
34.4231	0.441856	0.361186
34.6154	0.456729	0.38352
34.8077	0.500791	0.434165
35	0.472506	0.497874
35.1923	0.317724	0.5305
35.3846	0.191654	0.560723
35.5769	0.2947	0.58873
35.7692	0.542397	0.614581
35.9615	0.578317	0.593965
36.1538	0.364037	0.517221
36.3462	0.212831	0.399829
36.5385	0.208722	0.336771
36.7308	0.117294	0.349833
36.9231	0.0203006	0.336578
37.1154	0.0335324	0.300121
37.3077	0.157401	0.267197
37.5	0.321547	0.306171
37.6923	0.409099	0.405305
37.8846	0.36462	0.499975
38.0769	0.322811	0.554643
38.2692	0.358279	0.580356
38.4615	0.354243	0.619442
38.6538	0.401355	0.672847
38.8462	0.606418	0.709127
39.0385	0.857416	0.786021
39.2308	0.880232	0.895647
39.4231	0.725068	0.947557
39.6154	0.595131	0.927101
39.8077	0.577644	0.835564
40	0.538472	0.688915
40.1923	0.51382	0.553001
40.3846	0.527335	0.46538
40.5769	0.477766	0.360424
40.7692	0.367247	0.249924
40.9615	0.311038	0.221533
41.1538	0.335695	0.222489
41.3462	0.539848	0.199365
41.5385	0.691638	0.211984
41.7308	0.571208	0.223116
41.9231	0.388312	0.208423
42.1154	0.3887	0.238745
42.3077	0.509097	0.282925
42.5	0.592953	0.263099
42.6923	0.533389	0.222698
42.8846	0.339202	0.229361
43.0769	0.190472	0.227302
43.2692	0.214162	0.234245
43.4615	0.288979	0.263578
43.6538	0.305003	0.245451
43.8462	0.255191	0.211424
44.0385	0.222921	0.250194
44.2308	0.275406	0.318305
44.4231	0.404089	0.308137
44.6154	0.417551	0.251794
44.8077	0.359991	0.232699
45	0.374001	0.249674
45.1923	0.41439	0.269806
45.3846	0.372624	0.319918
45.5769	0.30989	0.332592
45.7692	0.308083	0.289093
45.9615	0.288535	0.261371
46.1538	0.266635	0.235437
46.3462	0.258945	0.214855
46.5385	0.23022	0.216876
46.7308	0.176578	0.242797
46.9231	0.204001	0.238513
47.1154	0.247263	0.215933
47.3077	0.227174	0.209149
47.5	0.242844	0.218836
47.6923	0.256948	0.187841
47.8846	0.198266	0.162604
48.0769	0.151925	0.192224
48.2692	0.147523	0.189943
48.4615	0.124394	0.147279
48.6538	0.122954	0.144104
48.8462	0.122927	0.150524
49.0385	0.0934698	0.142943
49.2308	0.116267	0.126265
49.4231	0.142699	0.145085
49.6154	0.0872501	0.20911
49.8077	0	0.272175

## Sheet: mCh-Rac, wGBD
	mCh-Rac	Active Cdc42
0	0.224627	0.266254
0.1923	0.209793	0.201231
0.3846	0.222807	0.143377
0.5769	0.227279	0.132208
0.7692	0.241383	0.160885
0.9615	0.268301	0.166815
1.1538	0.27084	0.149838
1.3462	0.218687	0.1293
1.5385	0.144844	0.117462
1.7308	0.138797	0.1221
1.9231	0.181639	0.122323
2.1154	0.211061	0.132954
2.3077	0.275059	0.172085
2.5	0.352334	0.177608
2.6923	0.393569	0.186092
2.8846	0.346181	0.179208
3.0769	0.319332	0.208262
3.2692	0.329717	0.247238
3.4615	0.362623	0.291485
3.6538	0.407511	0.305638
3.8462	0.384357	0.297131
4.0385	0.384488	0.303554
4.2308	0.358052	0.301015
4.4231	0.38264	0.300315
4.6154	0.397961	0.317769
4.8077	0.412168	0.359208
5	0.443662	0.414562
5.1923	0.452731	0.444869
5.3846	0.46976	0.444862
5.5769	0.500745	0.476077
5.7692	0.4923	0.5367
5.9615	0.50203	0.575931
6.1538	0.531877	0.581692
6.3462	0.591334	0.582577
6.5385	0.60367	0.596331
6.7308	0.550177	0.595192
6.9231	0.469762	0.568831
7.1154	0.46215	0.571769
7.3077	0.461894	0.617231
7.5	0.523881	0.707008
7.6923	0.577855	0.7754
7.8846	0.606732	0.782192
8.0769	0.630905	0.787077
8.2692	0.689413	0.836254
8.4615	0.764129	0.856831
8.6538	0.790777	0.844792
8.8462	0.802305	0.779485
9.0385	0.766817	0.750408
9.2308	0.731767	0.790638
9.4231	0.688095	0.850854
9.6154	0.698944	0.915408
9.8077	0.697455	0.888362
10	0.72682	0.863992
10.1923	0.749267	0.8173
10.3846	0.818529	0.794154
10.5769	0.813732	0.774208
10.7692	0.803183	0.768846
10.9615	0.793993	0.743569
11.1538	0.845665	0.689492
11.3462	0.919492	0.635315
11.5385	0.965335	0.530869
11.7308	1	0.418915
11.9231	0.997746	0.305362
12.1154	0.964904	0.226546
12.3077	0.91186	0.205138
12.5	0.852516	0.1827
12.6923	0.832039	0.174762
12.8846	0.822526	0.180585
13.0769	0.803811	0.197785
13.2692	0.690712	0.178515
13.4615	0.581906	0.124315
13.6538	0.547087	0.0945077
13.8462	0.561145	0.0746
14.0385	0.53913	0.0809462
14.2308	0.541038	0.0902308
14.4231	0.575858	0.0883
14.6154	0.481517	0.0810385
14.8077	0.390753	0.0713308
15	0.240111	0.0714538
15.1923	0.244987	0.0528
15.3846	0.19483	0.0392231
15.5769	0.174015	0.0269923
15.7692	0.113891	0.0302308
15.9615	0.0807625	0.0347692
16.1538	0.0604274	0.0293846
16.3462	0.0304306	0.0274154
16.5385	0.012287	0.0356769
16.7308	0.0322079	0.0347462
16.9231	0.0698721	0.0439769
17.1154	0.0760184	0.0618462
17.3077	0.0730838	0.0734385
17.5	0.0494642	0.0700769
17.6923	0.0361221	0.0467615
17.8846	0.0482201	0.0339308
18.0769	0.0370975	0.0304
18.2692	0.045704	0.0346154
18.4615	0.020482	0.0335846
18.6538	0	0.0330308
18.8462	0.00574606	0.0389846
19.0385	0.033228	0.0642
19.2308	0.106519	0.0781385
19.4231	0.141054	0.0825462
19.6154	0.187027	0.101177
19.8077	0.175195	0.0984154
20	0.144263	0.102185
20.1923	0.0825062	0.0791846
20.3846	0.0579868	0.0910154
20.5769	0.0973891	0.0720769
20.7692	0.163172	0.0806308
20.9615	0.170008	0.0839308
21.1538	0.146802	0.0877846
21.3462	0.113516	0.0560846
21.5385	0.0917564	0.0485
21.7308	0.0724666	0.0660077
21.9231	0.105216	0.0828538
22.1154	0.152532	0.0802846
22.3077	0.167074	0.0815846
22.5	0.16362	0.0732462
22.6923	0.168136	0.0883
22.8846	0.185349	0.0943692
23.0769	0.239139	0.115292
23.2692	0.25286	0.117938
23.4615	0.247451	0.118092
23.6538	0.225259	0.120862
23.8462	0.28783	0.1207
24.0385	0.348368	0.114777
24.2308	0.34203	0.0948462
24.4231	0.255876	0.0663846
24.6154	0.245838	0.0596077
24.8077	0.265724	0.0733077
25	0.288732	0.0949846
25.1923	0.22735	0.1062
25.3846	0.191063	0.114477
25.5769	0.189707	0.131085
25.7692	0.245628	0.156054
25.9615	0.313875	0.139885
26.1538	0.331614	0.128954
26.3462	0.360622	0.109477
26.5385	0.380936	0.127531
26.7308	0.413887	0.124115
26.9231	0.386778	0.102538
27.1154	0.35185	0.0925231
27.3077	0.316398	0.0963923
27.5	0.335709	0.102008
27.6923	0.31948	0.102985
27.8846	0.287412	0.0859923
28.0769	0.265168	0.0693231
28.2692	0.270661	0.0537077
28.4615	0.298136	0.0757
28.6538	0.298837	0.112992
28.8462	0.310227	0.130846
29.0385	0.290218	0.104062
29.2308	0.278198	0.0872385
29.4231	0.283986	0.0877538
29.6154	0.230269	0.120031
29.8077	0.212363	0.118846
30	0.222613	0.0953615
30.1923	0.315464	0.0741462
30.3846	0.359007	0.100069
30.5769	0.327577	0.112008
30.7692	0.256103	0.103085
30.9615	0.179583	0.0739538
31.1538	0.134324	0.0643923
31.3462	0.0992391	0.0619308
31.5385	0.133251	0.0670846
31.7308	0.13907	0.0664538
31.9231	0.144066	0.0544231
32.1154	0.127109	0.0171077
32.3077	0.127789	0
32.5	0.104924	0.0251
32.6923	0.085228	0.0516154
32.8846	0.0806533	0.0582077
33.0769	0.135218	0.0687615
33.2692	0.161288	0.0919692
33.4615	0.172562	0.120592
33.6538	0.186822	0.110146
33.8462	0.247248	0.0753077
34.0385	0.265691	0.0521692
34.2308	0.26447	0.0584
34.4231	0.245351	0.0618615
34.6154	0.25547	0.0351923
34.8077	0.230216	0.0150385
35	0.208243	0.026
35.1923	0.21992	0.0611615
35.3846	0.254885	0.0851692
35.5769	0.318393	0.0976923
35.7692	0.332374	0.0889
35.9615	0.405338	0.0770154
36.1538	0.464171	0.0646769
36.3462	0.484282	0.0758692
36.5385	0.466101	0.102723
36.7308	0.519211	0.126746
36.9231	0.594125	0.143246
37.1154	0.579638	0.118223
37.3077	0.551754	0.1219
37.5	0.574928	0.133546
37.6923	0.591218	0.194346
37.8846	0.618909	0.286046
38.0769	0.702947	0.407892
38.2692	0.791909	0.536623
38.4615	0.842742	0.621915
38.6538	0.777011	0.683677
38.8462	0.733323	0.721323
39.0385	0.664035	0.738654
39.2308	0.677349	0.803808
39.4231	0.656657	0.850608
39.6154	0.642779	0.883554
39.8077	0.693445	0.895131
40	0.7475	0.962462
40.1923	0.757035	0.993792
40.3846	0.700959	1.00357
40.5769	0.642666	0.957585
40.7692	0.62518	0.967515
40.9615	0.694552	0.970246
41.1538	0.730527	0.978723
41.3462	0.691766	0.927315
41.5385	0.611082	0.896815
41.7308	0.560992	0.852131
41.9231	0.574904	0.785862
42.1154	0.573352	0.695692
42.3077	0.598187	0.654308
42.5	0.587841	0.642246
42.6923	0.602422	0.617123
42.8846	0.583482	0.562831
43.0769	0.531842	0.547208
43.2692	0.447686	0.565785
43.4615	0.439769	0.551485
43.6538	0.459172	0.489831
43.8462	0.481177	0.429962
44.0385	0.42073	0.413769
44.2308	0.416655	0.410962
44.4231	0.458418	0.392215
44.6154	0.523088	0.336508
44.8077	0.530927	0.340038
45	0.51528	0.339231
45.1923	0.506297	0.361415
45.3846	0.488777	0.349469
45.5769	0.461007	0.357408
45.7692	0.402648	0.321623
45.9615	0.383137	0.309846
46.1538	0.342496	0.286269
46.3462	0.32852	0.269046
46.5385	0.298781	0.256262
46.7308	0.311582	0.247092
46.9231	0.309018	0.210462
47.1154	0.359203	0.176562
47.3077	0.346542	0.1782
47.5	0.303694	0.200262
47.6923	0.222904	0.210831
47.8846	0.213934	0.190446
48.0769	0.207861	0.1495
48.2692	0.240502	0.106585
48.4615	0.2668	0.101846
48.6538	0.316373	0.110331
48.8462	0.278321	0.122877
49.0385	0.240486	0.105477
49.2308	0.213044	0.117815
49.4231	0.244209	0.100931
49.6154	0.247902	0.0808615
49.8077	0.253146	0.0535154
50	0.253724	0.0695462
50.1923	0.266623	0.0838769
50.3846	0.266763	0.101031
50.5769	0.264095	0.127338
50.7692	0.267554	0.164315
50.9615	0.289948	0.194723
