# Supplementary material for: Extraction of active RhoGTPases by RhoGDI regulates spatiotemporal patterning of RhoGTPases
Source: eLife. 2019 Oct 24;8:e50471. doi: 10.7554/eLife.50471 (PMC6910828; doi:10.7554/eLife.50471)
Supplement: Figure 1—figure supplement 2—source data 1. [file elife-50471-fig1-figsupp2-data1.xlsx]

## Sheet: Sheet1
				average
	1oocyte	2290.62		2675.46		0.165582	uM
	1oocyte	3060.3
	2oocytes	4068		4247.75	0.291244	0.145622	uM
	2oocytes	4427.49
	0.025uM	880.355		per oocyte:		0.155602	uM
	0.05uM	1533.43
	0.1uM	2212.08
	0.2uM	3007.1
	0.4uM	4631.74
	0.8uM	11063.9
