# Supplementary material for: Extraction of active RhoGTPases by RhoGDI regulates spatiotemporal patterning of RhoGTPases
Source: eLife. 2019 Oct 24;8:e50471. doi: 10.7554/eLife.50471 (PMC6910828; doi:10.7554/eLife.50471)
Supplement: Figure 1—figure supplement 3—source data 1. [file elife-50471-fig1-figsupp3-data1.xlsx]

## Sheet: IT-Rac, wGBD
	Active Cdc42	IT-Rac
0	0.230961	0.173888
0.1923	0.24572	0.202289
0.3845	0.262718	0.242963
0.5768	0.276042	0.374874
0.769	0.282253	0.487184
0.9613	0.298937	0.490774
1.1535	0.28936	0.405726
1.3458	0.281978	0.317862
1.538	0.276234	0.267829
1.7303	0.255947	0.244421
1.9225	0.240461	0.225059
2.1148	0.236957	0.214262
2.3071	0.267983	0.187619
2.4993	0.276223	0.199036
2.6916	0.255694	0.233159
2.8838	0.23057	0.255565
3.0761	0.235043	0.24567
3.2683	0.255826	0.222517
3.4606	0.253141	0.210444
3.6528	0.224497	0.226544
3.8451	0.215459	0.273305
4.0374	0.225559	0.327146
4.2296	0.234944	0.353771
4.4219	0.231528	0.29654
4.6141	0.234256	0.247383
4.8064	0.242739	0.262362
4.9986	0.243102	0.332167
5.1909	0.243971	0.33768
5.3831	0.264099	0.309442
5.5754	0.276278	0.26454
5.7676	0.280349	0.28906
5.9599	0.285531	0.348805
6.1522	0.308333	0.403876
6.3444	0.324996	0.417216
6.5367	0.324891	0.367229
6.7289	0.296011	0.306244
6.9212	0.280712	0.3266
7.1134	0.289558	0.388395
7.3057	0.299284	0.416532
7.4979	0.287451	0.397061
7.6902	0.275943	0.425188
7.8824	0.274403	0.495713
8.0747	0.284172	0.599094
8.267	0.294608	0.656179
8.4592	0.302947	0.629218
8.6515	0.336993	0.546292
8.8437	0.357358	0.44917
9.036	0.37242	0.411293
9.2282	0.391019	0.425298
9.4205	0.400778	0.456551
9.6127	0.402885	0.475011
9.805	0.412781	0.501089
9.9973	0.466416	0.554274
10.1895	0.56802	0.60776
10.3818	0.650888	0.617208
10.574	0.680082	0.572862
10.7663	0.688168	0.560807
10.9585	0.725482	0.615523
11.1508	0.796984	0.636024
11.343	0.888758	0.654348
11.5353	0.981219	0.734904
11.7275	1	0.785757
11.9198	0.979575	0.772964
12.1121	0.95724	0.774212
12.3043	0.962279	0.866441
12.4966	0.950898	0.884655
12.6888	0.931067	0.875288
12.8811	0.919701	0.914979
13.0733	0.930648	0.94328
13.2656	0.944126	0.953075
13.4578	0.912589	0.953057
13.6501	0.869345	0.978624
13.8423	0.818108	0.97487
14.0346	0.780437	0.933904
14.2269	0.703571	0.885575
14.4191	0.611038	0.85835
14.6114	0.540383	0.898751
14.8036	0.461289	0.888701
14.9959	0.368228	0.872837
15.1881	0.283193	0.826513
15.3804	0.254159	0.742695
15.5726	0.240269	0.658156
15.7649	0.218848	0.602885
15.9572	0.182354	0.536843
16.1494	0.171418	0.416869
16.3417	0.1586	0.334737
16.5339	0.142499	0.297169
16.7262	0.127145	0.274955
16.9184	0.124472	0.221241
17.1107	0.133048	0.215656
17.3029	0.141608	0.188312
17.4952	0.135804	0.117641
17.6874	0.125611	0.0615404
17.8797	0.121908	0.043563
18.072	0.117343	0.0486474
18.2642	0.100729	0.0573399
18.4565	0.0995687	0.0715633
18.6487	0.119537	0.120721
18.841	0.149524	0.134407
19.0332	0.164415	0.111627
19.2255	0.15602	0.0653582
19.4177	0.144072	0.0930122
19.61	0.142169	0.129942
19.8022	0.146817	0.116329
19.9945	0.151262	0.0962469
20.1868	0.147263	0.167309
20.379	0.135441	0.197924
20.5713	0.11863	0.147692
20.7635	0.119042	0.0695314
20.9558	0.121507	0.035727
21.148	0.119229	0.0432988
21.3403	0.108997	0.0570028
21.5325	0.0986445	0.0561007
21.7248	0.093105	0.0685291
21.917	0.0925714	0.0856591
22.1093	0.0995137	0.0940783
22.3016	0.111368	0.0540415
22.4938	0.106643	0.050005
22.6861	0.0829666	0.029121
22.8783	0.0793744	0.0122643
23.0706	0.0835387	0
23.2628	0.0762828	0.00800007
23.4551	0.0661224	0.0279
23.6473	0.0455321	0.0424879
23.8396	0.0446244	0.0697683
24.0319	0.058751	0.0971034
24.2241	0.0775206	0.160293
24.4164	0.0935176	0.187911
24.6086	0.108662	0.190845
24.8009	0.117398	0.205742
24.9931	0.130881	0.292832
25.1854	0.179009	0.33952
25.3776	0.218292	0.374628
25.5699	0.203687	0.439494
25.7621	0.166313	0.413553
25.9544	0.127129	0.280713
26.1467	0.0766129	0.183865
26.3389	0.0306408	0.178389
26.5312	0.0125864	0.204758
26.7234	0.0177353	0.197733
26.9157	0.0220867	0.142953
27.1079	0.023748	0.0849575
27.3002	0.0170807	0.0628434
27.4924	0.013109	0.0646566
27.6847	0.0257448	0.109632
27.8769	0.0238415	0.212931
28.0692	0.0127459	0.284549
28.2615	0.00277252	0.266089
28.4537	0.00349316	0.198599
28.646	0.00877415	0.169642
28.8382	0.00736588	0.140056
29.0305	0.00602363	0.12124
29.2227	0	0.124931
29.415	0.00351516	0.0918004
29.6072	0.0136151	0.0923653
29.7995	0.0209094	0.114325
29.9918	0.0305527	0.139846
30.184	0.0569192	0.148785
30.3763	0.0715465	0.207656
30.5685	0.0723661	0.288631
30.7608	0.0863937	0.408541
30.953	0.143814	0.457371
31.1453	0.180643	0.385343
31.3375	0.194808	0.282791
31.5298	0.169646	0.250162
31.722	0.141338	0.268658
31.9143	0.115324	0.298572
32.1066	0.131728	0.328559
32.2988	0.141707	0.342491
32.4911	0.13417	0.287237
32.6833	0.114295	0.228348
32.8756	0.108079	0.223364
33.0678	0.115538	0.254499
33.2601	0.122756	0.279319
33.4523	0.115989	0.299219
33.6446	0.0999263	0.278627
33.8368	0.1059	0.286053
34.0291	0.125072	0.253005
34.2214	0.142532	0.194343
34.4136	0.138037	0.186535
34.6059	0.133241	0.250845
34.7981	0.146096	0.318381
34.9904	0.18989	0.332386
35.1826	0.222187	0.272148
35.3749	0.217549	0.233369
35.5671	0.210717	0.243073
35.7594	0.223001	0.279738
35.9517	0.228959	0.296859
36.1439	0.225729	0.298162
36.3362	0.220911	0.269032
36.5284	0.229294	0.222836
36.7207	0.235164	0.23572
36.9129	0.230592	0.256467
37.1052	0.211179	0.244667
37.2974	0.209419	0.176849
37.4897	0.203632	0.177487
37.6819	0.182271	0.199036
37.8742	0.15519	0.241761
38.0665	0.148407	0.248604
38.2587	0.149375	0.249952
38.451	0.147604	0.169933
38.6432	0.136321	0.111154
38.8355	0.134143	0.117741
39.0277	0.136239	0.16679
39.22	0.134165	0.166799
39.4122	0.119031	0.151455
39.6045	0.107138	0.126662
39.7967	0.113178	0.0902332
39.989	0.122101	0.0582967
40.1813	0.120478	0.093969
40.3735	0.11424	0.156721
40.5658	0.116589	0.200767
40.758	0.113915	0.221925
40.9503	0.114185	0.296959
41.1425	0.117772	0.350163
41.3348	0.123685	0.345507
41.527	0.129511	0.283921
41.7193	0.143197	0.265989
41.9116	0.165752	0.304477
42.1038	0.169041	0.316376
42.2961	0.153424	0.302208
42.4883	0.142867	0.328103
42.6806	0.15519	0.368067
42.8728	0.170103	0.400487
43.0651	0.194561	0.389498
43.2573	0.227688	0.41143
43.4496	0.257344	0.465754
43.6418	0.273941	0.508925
43.8341	0.281334	0.567677
44.0264	0.293882	0.670958
44.2186	0.28969	0.756599
44.4109	0.29886	0.840946
44.6031	0.353755	0.914232
44.7954	0.401135	0.959681
44.9876	0.426149	0.951389
45.1799	0.461608	0.970934
45.3721	0.550769	1
45.5644	0.627756	0.980054
45.7566	0.686865	0.933393
45.9489	0.709908	0.847242
46.1412	0.72908	0.815734
46.3334	0.762113	0.815998
46.5257	0.801226	0.810304
46.7179	0.802084	0.817429
46.9102	0.819131	0.807898
47.1024	0.84876	0.827415
47.2947	0.850801	0.819725
47.4869	0.831327	0.813648
47.6792	0.831465	0.801611
47.8715	0.858953	0.749355
48.0637	0.841565	0.711505
48.256	0.801127	0.725382
48.4482	0.789041	0.779907
48.6405	0.801842	0.808126
48.8327	0.786312	0.756863
49.025	0.756392	0.735578
49.2172	0.706745	0.71536
49.4095	0.639165	0.720617
49.6017	0.568268	0.685728
49.794	0.542303	0.619951
49.9863	0.532814	0.523431
50.1785	0.530382	0.485025
50.3708	0.488305	0.499959
50.563	0.436832	0.612853
50.7553	0.384016	0.664061
50.9475	0.348876	0.63381
51.1398	0.322256	0.535531
51.332	0.33641	0.516105
51.5243	0.359674	0.513672
51.7165	0.346439	0.432997
51.9088	0.331718	0.354892
52.1011	0.319104	0.345097
52.2933	0.323384	0.369407
52.4856	0.311623	0.340486
52.6778	0.292479	0.308714
52.8701	0.262999	0.297369
53.0623	0.264957	0.303647
53.2546	0.293365	0.349816
53.4468	0.30089	0.38445
53.6391	0.292545	0.362108
53.8313	0.302513	0.322645
54.0236	0.322383	0.322755
54.2159	0.326222	0.364331
54.4081	0.325342	0.430264
54.6004	0.327999	0.438583
54.7926	0.321601	0.41491
54.9849	0.312189	0.40107
55.1771	0.281537	0.388395
55.3694	0.268445	0.357142
55.5616	0.268087	0.34547
55.7539	0.293997	0.393826
55.9462	0.310302	0.402482
56.1384	0.302738	0.351037
56.3307	0.272829	0.319848
56.5229	0.250083	0.358463
56.7152	0.244444	0.397826
56.9074	0.244394	0.37871
57.0997	0.256178	0.319538
57.2919	0.270535	0.269032
57.4842	0.262196	0.250663
57.6764	0.2567	0.255155
57.8687	0.244526	0.27582
58.061	0.222308	0.299584
58.2532	0.210827	0.304231
58.4455	0.205381	0.287565
58.6377	0.228931	0.295319
58.83	0.2567	0.325935
59.0222	0.251001	0.348595
59.2145	0.235906	0.395302
59.4067	0.254043	0.402591
59.599	0.28579	0.392687
59.7912	0.275574	0.294335
59.9835	0.248465	0.226553
60.1758	0.241649	0.195091
60.368	0.245544	0.205715
60.5603	0.270106	0.221779
