# Supplementary material for: Extraction of active RhoGTPases by RhoGDI regulates spatiotemporal patterning of RhoGTPases
Source: eLife. 2019 Oct 24;8:e50471. doi: 10.7554/eLife.50471 (PMC6910828; doi:10.7554/eLife.50471)
Supplement: Figure 1—source data 1. [file elife-50471-fig1-data1.xlsx]

## Sheet: IT-Cdc42, wGBD
	Active Cdc42	IT-Cdc42
0	0.172317	0.188785
0.1923	0.157584	0.198358
0.3845	0.144169	0.254748
0.5768	0.154157	0.295622
0.769	0.177648	0.285984
0.9613	0.174088	0.277075
1.1535	0.144854	0.296049
1.3458	0.144515	0.289042
1.538	0.178699	0.235503
1.7303	0.217488	0.197441
1.9225	0.22182	0.180524
2.1148	0.192081	0.177486
2.3071	0.1998	0.185681
2.4993	0.236333	0.208376
2.6916	0.242728	0.24409
2.8838	0.211672	0.307346
3.0761	0.215691	0.385687
3.2683	0.262106	0.406393
3.4606	0.284219	0.352895
3.6528	0.273093	0.302439
3.8451	0.263417	0.286794
4.0374	0.289103	0.330139
4.2296	0.354058	0.370446
4.4219	0.387762	0.36161
4.6141	0.360007	0.322847
4.8064	0.328238	0.288971
4.9986	0.319967	0.287385
5.1909	0.32561	0.299015
5.3831	0.361923	0.369336
5.5754	0.427942	0.477364
5.7676	0.447233	0.500955
5.9599	0.409616	0.443802
6.1522	0.426771	0.426007
6.3444	0.498167	0.43511
6.5367	0.580928	0.468407
6.7289	0.639075	0.540825
6.9212	0.660669	0.557554
7.1134	0.697761	0.548873
7.3057	0.755741	0.607815
7.4979	0.761191	0.682196
7.6902	0.763886	0.699065
7.8824	0.801065	0.672451
8.0747	0.820443	0.663821
8.267	0.871941	0.728872
8.4592	0.956593	0.837299
8.6515	0.999108	0.851886
8.8437	0.972783	0.846095
9.036	0.946578	0.859743
9.2282	0.981308	0.86672
9.4205	1	0.858078
9.6127	0.936264	0.833024
9.805	0.853529	0.842143
9.9973	0.796753	0.936585
10.1895	0.746644	1
10.3818	0.703856	0.98752
10.574	0.666145	0.942655
10.7663	0.598543	0.831463
10.9585	0.517591	0.690006
11.1508	0.427809	0.662869
11.343	0.366654	0.682268
11.5353	0.307343	0.65973
11.7275	0.238064	0.574508
11.9198	0.199142	0.460965
12.1121	0.173435	0.423477
12.3043	0.142792	0.45324
12.4966	0.117418	0.438173
12.6888	0.088311	0.345118
12.8811	0.0729	0.31546
13.0733	0.07809	0.338848
13.2656	0.100642	0.328777
13.4578	0.129123	0.362584
13.6501	0.149266	0.361354
13.8423	0.156746	0.288674
14.0346	0.148581	0.257036
14.2269	0.123041	0.251425
14.4191	0.089223	0.206879
14.6114	0.06745	0.167977
14.8036	0.052224	0.123369
14.9959	0.035402	0.064692
15.1881	0.02337	0.028784
15.3804	0.028801	0.031106
15.5726	0.026804	0.046086
15.7649	0.022525	0.054999
15.9572	0.017894	0.047105
16.1494	0.016483	0.05393
16.3417	0.020922	0.060546
16.5339	0.022938	0.061839
16.7262	0.029366	0.049692
16.9184	0.049063	0.037679
17.1107	0.067337	0.021982
17.3029	0.065866	0.006279
17.4952	0.054314	0.006082
17.6874	0.048491	0.043914
17.8797	0.036719	0.094891
18.072	0.026032	0.109898
18.2642	0.020662	0.059183
18.4565	0.025393	0.013216
18.6487	0.030398	0.011474
18.841	0.027423	0.048452
19.0332	0.017129	0.103693
19.2255	0.020143	0.157469
19.4177	0.039122	0.175634
19.61	0.045883	0.152176
19.8022	0.041211	0.143371
19.9945	0.031529	0.177814
20.1868	0.01985	0.185203
20.379	0.00521	0.159545
20.5713	0.002063	0.126832
20.7635	0.007207	0.068281
20.9558	0.008598	0.02407
21.148	0.007526	0.028857
21.3403	0.004891	0.036782
21.5325	0.00167	0.039979
21.7248	0	0.070801
21.917	0.004219	0.098501
22.1093	0.009216	0.082084
22.3016	0.007034	0.060917
22.4938	0.002855	0.053611
22.6861	0.002229	0.035696
22.8783	0.006322	0.017913
23.0706	0.014946	0.011469
23.2628	0.020922	0.022102
23.4551	0.017475	0.049009
23.6473	0.011379	0.076001
23.8396	0.011672	0.079051
24.0319	0.014706	0.048107
24.2241	0.013828	0.025725
24.4164	0.010095	0.027048
24.6086	0.011326	0.03956
24.8009	0.017282	0.028472
24.9931	0.013735	0.015212
25.1854	0.006881	0.02482
25.3776	0.004572	0.036214
25.5699	0.006042	0.02956
25.7621	0.010062	0.018105
25.9544	0.015285	0.014995
26.1467	0.023118	0.017466
26.3389	0.0256	0.018501
26.5312	0.031762	0.015221
26.7234	0.037012	0.005668
26.9157	0.023051	0
27.1079	0.004592	0.01089
27.3002	0.00193	0.027945
27.4924	0.002402	0.028643
27.6847	0.006069	0.022863
27.8769	0.022512	0.025087
28.0692	0.038436	0.028047
28.2615	0.033665	0.034409
28.4537	0.018167	0.062757
28.646	0.009735	0.087442
28.8382	0.009709	0.079632
29.0305	0.014127	0.050107
29.2227	0.017375	0.024358
29.415	0.018679	0.010055
29.6072	0.016856	0.006972
29.7995	0.009975	0.010102
29.9918	0.00386	0.014662
30.184	0.005616	0.011329
30.3763	0.007925	0.011641
30.5685	0.004159	0.020412
30.7608	0.001111	0.02732
30.953	0.003041	0.044553
31.1453	0.012164	0.076194
31.3375	0.022985	0.087087
31.5298	0.020775	0.06776
31.722	0.015126	0.035763
31.9143	0.016683	0.015087
32.1066	0.011978	0.004511
32.2988	0.011299	0.005923
32.4911	0.029879	0.017331
32.6833	0.044053	0.043816
32.8756	0.028581	0.063616
33.0678	0.010388	0.049799
33.2601	0.005949	0.033451
33.4523	0.006395	0.035801
33.6446	0.014427	0.030419
33.8368	0.0184	0.018912
34.0291	0.013289	0.018426
34.2214	0.01653	0.057819
34.4136	0.027862	0.09802
34.6059	0.028301	0.077476
34.7981	0.016982	0.040356
34.9904	0.010734	0.048814
35.1826	0.012098	0.059675
35.3749	0.015212	0.053404
35.5671	0.017561	0.042686
35.7594	0.024954	0.063743
35.9517	0.040952	0.080177
36.1439	0.051219	0.081948
36.3362	0.042868	0.108418
36.5284	0.035329	0.144394
36.7207	0.054813	0.146321
36.9129	0.087732	0.130101
37.1052	0.117139	0.135198
37.2974	0.140196	0.165202
37.4897	0.171911	0.201327
37.6819	0.202223	0.215571
37.8742	0.202316	0.213917
38.0665	0.177049	0.179378
38.2587	0.142299	0.188066
38.451	0.141001	0.253509
38.6432	0.158017	0.290173
38.8355	0.148168	0.27052
39.0277	0.163134	0.222428
39.22	0.223264	0.167828
39.4122	0.253542	0.163099
39.6045	0.222339	0.20504
39.7967	0.191582	0.232712
39.989	0.186418	0.238889
40.1813	0.16933	0.247379
40.3735	0.140096	0.229922
40.5658	0.116659	0.193112
40.758	0.096776	0.186361
40.9503	0.094214	0.207174
41.1425	0.093009	0.232624
41.3348	0.100596	0.243521
41.527	0.136596	0.263309
41.7193	0.15984	0.341571
41.9116	0.165364	0.393021
42.1038	0.171372	0.391454
42.2961	0.185134	0.420605
42.4883	0.172584	0.439623
42.6806	0.133049	0.415168
42.8728	0.13657	0.412197
43.0651	0.172564	0.421768
43.2573	0.223344	0.411971
43.4496	0.273392	0.399945
43.6418	0.313106	0.432729
43.8341	0.320812	0.50044
44.0264	0.314936	0.565703
44.2186	0.354364	0.615053
44.4109	0.397119	0.639782
44.6031	0.419058	0.683532
44.7954	0.446628	0.776059
44.9876	0.471276	0.835701
45.1799	0.497634	0.764205
45.3721	0.548814	0.654692
45.5644	0.598004	0.650664
45.7566	0.618113	0.705222
45.9489	0.635189	0.697723
46.1412	0.63817	0.624107
46.3334	0.644811	0.618268
46.5257	0.693595	0.656482
46.7179	0.746145	0.645248
46.9102	0.743337	0.552506
47.1024	0.662605	0.499847
47.2947	0.613176	0.561791
47.4869	0.62741	0.587424
47.6792	0.59829	0.525182
47.8715	0.498546	0.444447
48.0637	0.408245	0.39772
48.256	0.405576	0.400077
48.4482	0.413469	0.407981
48.6405	0.379271	0.402678
48.8327	0.350957	0.360996
49.025	0.332916	0.294151
49.2172	0.306398	0.274382
49.4095	0.297395	0.301142
49.6017	0.323387	0.32179
49.794	0.32362	0.317125
49.9863	0.251379	0.294861
50.1785	0.198356	0.275641
50.3708	0.19471	0.237252
50.563	0.19843	0.188134
50.7553	0.215917	0.158021
50.9475	0.225314	0.142702
51.1398	0.201724	0.157902
51.332	0.157638	0.193997
51.5243	0.143836	0.181226
51.7165	0.151995	0.161847
51.9088	0.147183	0.178895
52.1011	0.139198	0.170728
52.2933	0.144289	0.165275
52.4856	0.181015	0.185373
52.6778	0.221667	0.185527
52.8701	0.231662	0.16474
53.0623	0.209789	0.165132
53.2546	0.186352	0.163793
53.4468	0.179025	0.141938
53.6391	0.182392	0.121398
53.8313	0.182592	0.133017
54.0236	0.165317	0.152019
54.2159	0.121903	0.194002
54.4081	0.094201	0.214096
54.6004	0.106545	0.199258
54.7926	0.128325	0.19568
54.9849	0.142379	0.188656
55.1771	0.148401	0.187574

## Sheet: IT-Rho, rGBD
	Active Rho	IT-Rho
0	0.10023	0.05397
0.1923	0.097686	0.077821
0.3846	0.097332	0.181433
0.5769	0.097027	0.253611
0.7692	0.097472	0.258212
0.9615	0.103004	0.23649
1.1538	0.107881	0.194493
1.3462	0.111652	0.199352
1.5385	0.116857	0.211129
1.7308	0.128258	0.235864
1.9231	0.142664	0.250372
2.1154	0.158583	0.255129
2.3077	0.15325	0.242617
2.5	0.154226	0.222741
2.6923	0.177394	0.21548
2.8846	0.20142	0.180149
3.0769	0.218766	0.20598
3.2692	0.248275	0.289928
3.4615	0.27001	0.355596
3.6538	0.282329	0.355893
3.8462	0.292609	0.342027
4.0385	0.302862	0.39854
4.2308	0.297652	0.443221
4.4231	0.28742	0.453284
4.6154	0.278364	0.414566
4.8077	0.276277	0.385089
5	0.296182	0.354743
5.1923	0.305432	0.347732
5.3846	0.282339	0.410849
5.5769	0.243543	0.448581
5.7692	0.234062	0.397014
5.9615	0.230897	0.344343
6.1538	0.236149	0.348491
6.3462	0.22918	0.308137
6.5385	0.229663	0.274637
6.7308	0.231755	0.245191
6.9231	0.253458	0.306392
7.1154	0.245598	0.314991
7.3077	0.237442	0.324781
7.5	0.264505	0.294818
7.6923	0.339888	0.30287
7.8846	0.454776	0.325101
8.0769	0.55662	0.387068
8.2692	0.6473	0.470132
8.4615	0.743586	0.616946
8.6538	0.837715	0.799075
8.8462	0.900387	0.912938
9.0385	0.943047	0.890425
9.2308	0.972503	0.840814
9.4231	1.0005	0.85655
9.6154	1.02188	0.889079
9.8077	1.02103	0.957799
10	1.01218	1
10.1923	0.986957	0.992621
10.3846	0.959578	0.872013
10.5769	0.901997	0.705143
10.7692	0.804214	0.564729
10.9615	0.685683	0.448542
11.1538	0.586908	0.347982
11.3462	0.496502	0.267728
11.5385	0.410388	0.18493
11.7308	0.350399	0.159037
11.9231	0.294492	0.160313
12.1154	0.23307	0.13539
12.3077	0.211641	0.113472
12.5	0.220386	0.135437
12.6923	0.229792	0.170861
12.8846	0.224383	0.199548
13.0769	0.20767	0.212326
13.2692	0.182496	0.214987
13.4615	0.174341	0.205745
13.6538	0.175693	0.178451
13.8462	0.164495	0.20454
14.0385	0.135829	0.19648
14.2308	0.118617	0.174445
14.4231	0.129852	0.151611
14.6154	0.155675	0.137346
14.8077	0.171175	0.11603
15	0.167994	0.105208
15.1923	0.163557	0.129818
15.3846	0.157204	0.193194
15.5769	0.14004	0.248376
15.7692	0.104093	0.228524
15.9615	0.083855	0.159992
16.1538	0.079042	0.113714
16.3462	0.090406	0.109371
16.5385	0.102134	0.14665
16.7308	0.100509	0.163028
16.9231	0.095632	0.174586
17.1154	0.096662	0.139647
17.3077	0.113241	0.09412
17.5	0.114051	0.067272
17.6923	0.109222	0.080027
17.8846	0.097504	0.100811
18.0769	0.095573	0.134584
18.2692	0.093233	0.127134
18.4615	0.082647	0.107102
18.6538	0.070683	0.082844
18.8462	0.061589	0.088533
19.0385	0.04523	0.105803
19.2308	0.027996	0.095177
19.4231	0.021885	0.089261
19.6154	0.025646	0.099293
19.8077	0.038625	0.094026
20	0.053573	0.111907
20.1923	0.065811	0.118605
20.3846	0.067893	0.131399
20.5769	0.0622	0.133324
20.7692	0.062286	0.166221
20.9615	0.072968	0.168036
21.1538	0.083243	0.138144
21.3462	0.083645	0.10056
21.5385	0.081016	0.098236
21.7308	0.07534	0.124098
21.9231	0.074782	0.134302
22.1154	0.079192	0.145022
22.3077	0.073247	0.12499
22.5	0.066283	0.083369
22.6923	0.076	0.054259
22.8846	0.079777	0.044501
23.0769	0.06212	0.046465
23.2692	0.03731	0.044063
23.4615	0.041007	0.044908
23.6538	0.05596	0.031214
23.8462	0.059276	0.009202
24.0385	0.054635	0
24.2308	0.046759	0.012919
24.4231	0.053439	0.03357
24.6154	0.06748	0.052663
24.8077	0.08834	0.071944
25	0.097939	0.088721
25.1923	0.095186	0.080145
25.3846	0.087487	0.063062
25.5769	0.080829	0.068031
25.7692	0.070023	0.069495
25.9615	0.077835	0.051348
26.1538	0.08408	0.063853
26.3462	0.0893	0.077719
26.5385	0.082744	0.0816
26.7308	0.086392	0.107822
26.9231	0.079262	0.129701
27.1154	0.090969	0.120225
27.3077	0.104425	0.088635
27.5	0.099473	0.098471
27.6923	0.088469	0.096343
27.8846	0.103604	0.121422
28.0769	0.115843	0.156384
28.2692	0.115253	0.179609
28.4615	0.10104	0.169171
28.6538	0.094832	0.111429
28.8462	0.08533	0.129701
29.0385	0.085818	0.191488
29.2308	0.09892	0.218062
29.4231	0.116943	0.187348
29.6154	0.124942	0.152261
29.8077	0.12425	0.157723
30	0.121777	0.151165
30.1923	0.115247	0.126657
30.3846	0.103186	0.080747
30.5769	0.086398	0.058297
30.7692	0.071992	0.081498
30.9615	0.058938	0.116735
31.1538	0.051974	0.125053
31.3462	0.061454	0.076874
31.5385	0.073773	0.091045
31.7308	0.083785	0.155923
31.9231	0.085802	0.187442
32.1154	0.078913	0.1269
32.3077	0.073253	0.073673
32.5	0.065103	0.087946
32.6923	0.071761	0.126219
32.8846	0.082835	0.130562
33.0769	0.107784	0.110702
33.2692	0.130281	0.07498
33.4615	0.148797	0.044728
33.6538	0.137181	0.05332
33.8462	0.134487	0.098369
34.0385	0.121739	0.120671
34.2308	0.119545	0.086295
34.4231	0.116073	0.033624
34.6154	0.134412	0.017786
34.8077	0.141671	0.034423
35	0.140378	0.060058
35.1923	0.136489	0.067601
35.3846	0.157263	0.054314
35.5769	0.177651	0.044267
35.7692	0.192953	0.042302
35.9615	0.199681	0.060504
36.1538	0.233612	0.104379
36.3462	0.291707	0.143348
36.5385	0.35424	0.146979
36.7308	0.416129	0.121704
36.9231	0.440434	0.153614
37.1154	0.402115	0.19004
37.3077	0.36144	0.203077
37.5	0.356075	0.186981
37.6923	0.378288	0.180955
37.8846	0.392629	0.175564
38.0769	0.403714	0.169421
38.2692	0.42994	0.189766
38.4615	0.45903	0.255481
38.6538	0.513043	0.291
38.8462	0.56293	0.326314
39.0385	0.626584	0.34957
39.2308	0.702541	0.403978
39.4231	0.779753	0.485031
39.6154	0.844819	0.565504
39.8077	0.832462	0.645179
40	0.776797	0.615929
40.1923	0.668385	0.61362
40.3846	0.564116	0.537545
40.5769	0.446679	0.458644
40.7692	0.349653	0.358452
40.9615	0.286278	0.313121
41.1538	0.270343	0.25923
41.3462	0.249938	0.270967
41.5385	0.218578	0.324827
41.7308	0.209489	0.36846
41.9231	0.234218	0.348358
42.1154	0.253834	0.32622
42.3077	0.257181	0.278417
42.5	0.243645	0.251452
42.6923	0.228713	0.252923
42.8846	0.217559	0.283417
43.0769	0.215885	0.310226
43.2692	0.211496	0.350713
43.4615	0.212166	0.359563
43.6538	0.204167	0.351276
43.8462	0.202283	0.299732
44.0385	0.188538	0.251397
44.2308	0.16508	0.237852
44.4231	0.15193	0.274426
44.6154	0.176482	0.242445
44.8077	0.215112	0.256773
45	0.229668	0.242155
45.1923	0.229094	0.204931
45.3846	0.214871	0.206794
45.5769	0.202997	0.210612
45.7692	0.203818	0.221262
45.9615	0.205878	0.276179
46.1538	0.210659	0.367333
46.3462	0.209736	0.396576
46.5385	0.202289	0.335117
46.7308	0.187116	0.29708
46.9231	0.188693	0.261679
47.1154	0.181305	0.189359
47.3077	0.172844	0.177661
47.5	0.174663	0.184211
47.6923	0.192701	0.200268
47.8846	0.184975	0.22555
48.0769	0.173767	0.199728
48.2692	0.168697	0.188491

## Sheet: Cy3-Cdc42, wGBD
	Cy3-Cdc4	Active Cdc42
0	0.189165	0
0.1923	0.161495	0.028117
0.3846	0.097702	0.078388
0.5769	0.03301	0.1072
0.7692	0.043388	0.083246
0.9615	0.063615	0.052093
1.1538	0.057031	0.061597
1.3462	0.05641	0.075674
1.5385	0.058393	0.063346
1.7308	0.104987	0.028395
1.9231	0.126258	0.027993
2.1154	0.125259	0.032287
2.3077	0.102719	0.053739
2.5	0.106229	0.058422
2.6923	0.139035	0.062241
2.8846	0.172243	0.046225
3.0769	0.200243	0.049649
3.2692	0.199972	0.062716
3.4615	0.181841	0.07304
3.6538	0.172878	0.05908
3.8462	0.173631	0.024327
4.0385	0.163584	0.030122
4.2308	0.155024	0.057653
4.4231	0.173043	0.075674
4.6154	0.200713	0.084695
4.8077	0.191478	0.093753
5	0.13805	0.108737
5.1923	0.082228	0.106973
5.3846	0.088356	0.109293
5.5769	0.141104	0.111926
5.7692	0.181213	0.123362
5.9615	0.216854	0.1379
6.1538	0.234999	0.175821
6.3462	0.268815	0.218673
6.5385	0.303392	0.246746
6.7308	0.290318	0.237191
6.9231	0.266727	0.231382
7.1154	0.245826	0.236232
7.3077	0.320261	0.265359
7.5	0.344288	0.298715
7.6923	0.35105	0.359302
7.8846	0.307887	0.395291
8.0769	0.294231	0.39974
8.2692	0.327816	0.378376
8.4615	0.361375	0.416875
8.6538	0.426702	0.488473
8.8462	0.546647	0.596346
9.0385	0.694777	0.671486
9.2308	0.779933	0.719869
9.4231	0.825066	0.724076
9.6154	0.894405	0.753627
9.8077	0.946975	0.813907
10	0.98329	0.902538
10.1923	0.973897	0.898221
10.3846	0.929445	0.843721
10.5769	0.871766	0.779674
10.7692	0.871416	0.764558
10.9615	0.871231	0.765311
11.1538	0.904942	0.773389
11.3462	0.908967	0.819746
11.5385	0.943722	0.876521
11.7308	0.903673	0.848228
11.9231	0.856252	0.760109
12.1154	0.844202	0.725788
12.3077	0.913845	0.738614
12.5	0.977863	0.750891
12.6923	0.968239	0.717023
12.8846	0.875322	0.638664
13.0769	0.783258	0.575816
13.2692	0.67377	0.515288
13.4615	0.619251	0.479927
13.6538	0.627229	0.407612
13.8462	0.630435	0.367642
14.0385	0.543289	0.302724
14.2308	0.443941	0.241925
14.4231	0.40789	0.185837
14.6154	0.41877	0.136824
14.8077	0.449691	0.125052
15	0.497931	0.093796
15.1923	0.50737	0.108261
15.3846	0.461259	0.102371
15.5769	0.425082	0.106139
15.7692	0.402165	0.101523
15.9615	0.425598	0.116009
16.1538	0.405689	0.131417
16.3462	0.402311	0.104091
16.5385	0.3562	0.072645
16.7308	0.295996	0.085053
16.9231	0.202002	0.110522
17.1154	0.165349	0.123494
17.3077	0.158673	0.104003
17.5	0.155626	0.094945
17.6923	0.154324	0.071789
17.8846	0.161634	0.074254
18.0769	0.168251	0.071342
18.2692	0.15905	0.07135
18.4615	0.131565	0.078205
18.6538	0.142558	0.097191
18.8462	0.168495	0.101435
19.0385	0.211421	0.104786
19.2308	0.20103	0.099284
19.4231	0.187288	0.081951
19.6154	0.188345	0.061194
19.8077	0.219201	0.085448
20	0.254498	0.113799
20.1923	0.29127	0.118058
20.3846	0.312507	0.098391
20.5769	0.275994	0.087007
20.7692	0.21924	0.092062
20.9615	0.199067	0.109988
21.1538	0.182799	0.144748
21.3462	0.198108	0.145662
21.5385	0.207151	0.147711
21.7308	0.22041	0.138405
21.9231	0.198789	0.128352
22.1154	0.182271	0.124445
22.3077	0.177663	0.143731
22.5	0.153927	0.122586
22.6923	0.134038	0.078388
22.8846	0.147132	0.043211
23.0769	0.186587	0.060243
23.2692	0.220695	0.083927
23.4615	0.217449	0.127949
23.6538	0.186924	0.143592
23.8462	0.163393	0.159512
24.0385	0.194539	0.134578
24.2308	0.230907	0.148589
24.4231	0.219895	0.160339
24.6154	0.179594	0.189744
24.8077	0.15515	0.157032
25	0.128571	0.114319
25.1923	0.10463	0.097191
25.3846	0.067891	0.145758
25.5769	0.070324	0.193168
25.7692	0.048927	0.19777
25.9615	0.038682	0.155584
26.1538	0.017735	0.123925
26.3462	0.026599	0.098303
26.5385	0.023895	0.11366
26.7308	0.018376	0.136305
26.9231	0.008758	0.175572
27.1154	0	0.164758
27.3077	0.00039	0.140307
27.5	0.008996	0.140431
27.6923	0.015256	0.141741
27.8846	0.029467	0.128249
28.0769	0.041075	0.099891
28.2692	0.053739	0.051764
28.4615	0.041392	0.020954
28.6538	0.041755	0.029975
28.8462	0.05253	0.048896
29.0385	0.07694	0.045998
29.2308	0.069405	0.022198
29.4231	0.088957	0.034241
29.6154	0.10065	0.057009
29.8077	0.096327	0.080451
30	0.082863	0.072476
30.1923	0.092474	0.055407
30.3846	0.120784	0.057507
30.5769	0.143424	0.061568
30.7692	0.151157	0.072125
30.9615	0.137898	0.045625
31.1538	0.125702	0.03007
31.3462	0.141626	0.021803
31.5385	0.194341	0.045325
31.7308	0.219386	0.060909
31.9231	0.213754	0.043935
32.1154	0.154958	0.019462
32.3077	0.099302	0.030897
32.5	0.079287	0.071686
32.6923	0.08747	0.088185
32.8846	0.08591	0.086143
33.0769	0.108576	0.074071
33.2692	0.141229	0.075922
33.4615	0.154178	0.072418
33.6538	0.130918	0.076083
33.8462	0.120507	0.07244
34.0385	0.103023	0.053132
34.2308	0.114763	0.051639
34.4231	0.093604	0.077803
34.6154	0.106474	0.090328
34.8077	0.107274	0.074108
35	0.117208	0.057895
35.1923	0.110651	0.041623
35.3846	0.120923	0.03866
35.5769	0.141606	0.029851
35.7692	0.136133	0.059841
35.9615	0.126522	0.081102
36.1538	0.106375	0.09425
36.3462	0.104848	0.076398
36.5385	0.106203	0.044615
36.7308	0.105991	0.03067
36.9231	0.090273	0.034036
37.1154	0.092626	0.064267
37.3077	0.073001	0.083685
37.5	0.049958	0.090731
37.6923	0.052715	0.08329
37.8846	0.072254	0.0816
38.0769	0.08782	0.090226
38.2692	0.109528	0.08997
38.4615	0.142551	0.087424
38.6538	0.174986	0.078681
38.8462	0.172501	0.057456
39.0385	0.15749	0.054405
39.2308	0.146279	0.083985
39.4231	0.144012	0.111619
39.6154	0.172415	0.119675
39.8077	0.241027	0.111027
40	0.280257	0.086853
40.1923	0.271532	0.075579
40.3846	0.28464	0.069469
40.5769	0.302414	0.072908
40.7692	0.297979	0.105927
40.9615	0.272081	0.10322
41.1538	0.291131	0.097674
41.3462	0.294931	0.054676
41.5385	0.243241	0.042347
41.7308	0.240293	0.029346
41.9231	0.277527	0.034943
42.1154	0.324115	0.038572
42.3077	0.310577	0.059409
42.5	0.300325	0.093826
42.6923	0.349385	0.119279
42.8846	0.390168	0.129596
43.0769	0.448369	0.140314
43.2692	0.508904	0.180189
43.4615	0.607935	0.216434
43.6538	0.69785	0.242393
43.8462	0.70959	0.267825
44.0385	0.700911	0.331397
44.2308	0.703297	0.391421
44.4231	0.770878	0.461073
44.6154	0.842801	0.52774
44.8077	0.877133	0.587793
45	0.884616	0.641576
45.1923	0.948806	0.730441
45.3846	1.01237	0.843209
45.5769	1.07587	0.938864
45.7692	1.16631	0.990423
45.9615	1.23248	0.990869
46.1538	1.19611	1
46.3462	1.06674	0.992515
46.5385	1.00093	0.99193
46.7308	1.04137	0.954148
46.9231	1.07757	0.937467
47.1154	1.06109	0.965862
47.3077	0.985227	0.987708
47.5	0.993965	0.977056
47.6923	0.971227	0.920339
47.8846	0.907995	0.853328
48.0769	0.819018	0.812802
48.2692	0.752786	0.756181
48.4615	0.681266	0.722284
48.6538	0.624182	0.669247
48.8462	0.63493	0.659245
49.0385	0.632359	0.636733
49.2308	0.616832	0.599646
49.4231	0.571368	0.558535
49.6154	0.51402	0.457034
49.8077	0.456295	0.407166
50	0.398808	0.391245
50.1923	0.352445	0.373547
50.3846	0.301019	0.304604
50.5769	0.249124	0.239934
50.7692	0.197652	0.241742
50.9615	0.149987	0.228126
51.1538	0.139742	0.184052
51.3462	0.132947	0.10818
51.5385	0.109343	0.081856
51.7308	0.099157	0.07672
51.9231	0.108411	0.095274
52.1154	0.12787	0.09294
52.3077	0.160332	0.087541
52.5	0.181815	0.092209
52.6923	0.174425	0.083392
52.8846	0.120897	0.076852
53.0769	0.102389	0.080949
53.2692	0.104709	0.097381
53.4615	0.113864	0.112826
53.6538	0.100816	0.124174
53.8462	0.093016	0.100937
54.0385	0.102885	0.078688
54.2308	0.126661	0.050454
54.4231	0.140119	0.031475
54.6154	0.124631	0.008853
54.8077	0.119687	0.029427
55	0.138394	0.051449
55.1923	0.138354	0.073325
55.3846	0.131208	0.070552
55.5769	0.116078	0.086824
55.7692	0.123045	0.07691
55.9615	0.122305	0.077737
56.1538	0.142664	0.067721
56.3462	0.125973	0.076113
56.5385	0.098938	0.083722
56.7308	0.075255	0.064472
56.9231	0.058518	0.052107
57.1154	0.053111	0.059599
57.3077	0.05364	0.084022
57.5	0.063377	0.087577
57.6923	0.070912	0.057478
57.8846
58.0769
58.2692
58.4615
58.6538
58.8462
59.0385
59.2308
59.4231
59.6154
59.8077
60
60.1923
60.3846
60.5769
60.7692
60.9615
61.1538
61.3462
61.5385
61.7308
61.9231
62.1154
62.3077
62.5
62.6923
62.8846
63.0769

## Sheet: Cy3-Rho, rGBD
	Cy3-Rho	Active Rho
0	0.220763	0.096998
0.1923	0.329067	0.075386
0.3846	0.417634	0.091644
0.5769	0.368845	0.126819
0.7692	0.245943	0.132555
0.9615	0.153326	0.102769
1.1538	0.158895	0.070918
1.3462	0.185065	0.071548
1.5385	0.20695	0.08644
1.7308	0.228995	0.07543
1.9231	0.230492	0.103771
2.1154	0.209648	0.125064
2.3077	0.184077	0.085031
2.5	0.177071	0.047896
2.6923	0.192671	0.070369
2.8846	0.215607	0.112884
3.0769	0.212756	0.165098
3.2692	0.175982	0.20647
3.4615	0.130958	0.196727
3.6538	0.130925	0.172127
3.8462	0.178963	0.172322
4.0385	0.20033	0.176019
4.2308	0.178333	0.170088
4.4231	0.164129	0.161623
4.6154	0.170119	0.198961
4.8077	0.199303	0.241627
5	0.23851	0.22294
5.1923	0.247668	0.210592
5.3846	0.249562	0.217746
5.5769	0.226861	0.193075
5.7692	0.187093	0.180407
5.9615	0.172553	0.186054
6.1538	0.201877	0.175966
6.3462	0.218561	0.165931
6.5385	0.197845	0.20397
6.7308	0.195123	0.285605
6.9231	0.255888	0.323777
7.1154	0.365323	0.314824
7.3077	0.493565	0.31493
7.5	0.593802	0.39739
7.6923	0.574509	0.514441
7.8846	0.525709	0.607335
8.0769	0.542807	0.647864
8.2692	0.640998	0.721158
8.4615	0.805837	0.75238
8.6538	0.932142	0.722878
8.8462	0.985652	0.738418
9.0385	1	0.784559
9.2308	0.966895	0.792449
9.4231	0.897032	0.782565
9.6154	0.875249	0.811358
9.8077	0.894957	0.829912
10	0.84722	0.782627
10.1923	0.723463	0.709918
10.3846	0.619878	0.678412
10.5769	0.576594	0.690114
10.7692	0.555225	0.663812
10.9615	0.500057	0.58293
11.1538	0.439476	0.491259
11.3462	0.42422	0.447485
11.5385	0.433987	0.442459
11.7308	0.45844	0.39739
11.9231	0.433548	0.329167
12.1154	0.359609	0.29455
12.3077	0.291721	0.268355
12.5	0.242314	0.218065
12.6923	0.217505	0.220591
12.8846	0.189014	0.255341
13.0769	0.180195	0.24528
13.2692	0.178167	0.223791
13.4615	0.176218	0.225325
13.6538	0.151769	0.230201
13.8462	0.119153	0.23216
14.0385	0.100155	0.238693
14.2308	0.0934826	0.215122
14.4231	0.124889	0.164929
14.6154	0.162352	0.112592
14.8077	0.143215	0.078941
15	0.101112	0.067807
15.1923	0.111493	0.084065
15.3846	0.14875	0.103346
15.5769	0.139416	0.140436
15.7692	0.108377	0.163201
15.9615	0.123587	0.140994
16.1538	0.170038	0.115579
16.3462	0.186572	0.105092
16.5385	0.177019	0.085004
16.7308	0.163052	0.062231
16.9231	0.155951	0.093399
17.1154	0.154787	0.147093
17.3077	0.149649	0.162279
17.5	0.146355	0.128477
17.6923	0.18867	0.079792
17.8846	0.244818	0.057586
18.0769	0.257741	0.071299
18.2692	0.215102	0.0791
18.4615	0.160954	0.054297
18.6538	0.125922	0.041186
18.8462	0.0782407	0.084481
19.0385	0.0238484	0.141757
19.2308	0.035091	0.166853
19.4231	0.080771	0.182198
19.6154	0.144219	0.191302
19.8077	0.18916	0.193341
20	0.221262	0.199378
20.1923	0.233201	0.228631
20.3846	0.231222	0.245696
20.5769	0.194425	0.24098
20.7692	0.122882	0.219004
20.9615	0.0771068	0.208828
21.1538	0.11049	0.213836
21.3462	0.156098	0.209102
21.5385	0.178015	0.187401
21.7308	0.185141	0.186896
21.9231	0.162303	0.214262
22.1154	0.145583	0.2245
22.3077	0.148529	0.215458
22.5	0.167992	0.174414
22.6923	0.190076	0.165319
22.8846	0.219119	0.17195
23.0769	0.234552	0.180744
23.2692	0.22129	0.2174
23.4615	0.220502	0.264064
23.6538	0.227439	0.266856
23.8462	0.242574	0.222329
24.0385	0.234693	0.188226
24.2308	0.214551	0.223375
24.4231	0.208935	0.300392
24.6154	0.23759	0.356949
24.8077	0.252258	0.349653
25	0.249351	0.349104
25.1923	0.258792	0.372161
25.3846	0.27617	0.365814
25.5769	0.270652	0.333839
25.7692	0.251633	0.352508
25.9615	0.243523	0.356346
26.1538	0.267677	0.285375
26.3462	0.243835	0.233144
26.5385	0.17311	0.275437
26.7308	0.136602	0.328165
26.9231	0.160074	0.326968
27.1154	0.201188	0.31501
27.3077	0.23272	0.289674
27.5	0.232581	0.21568
27.6923	0.253618	0.204581
27.8846	0.254728	0.248737
28.0769	0.237801	0.273824
28.2692	0.219601	0.268222
28.4615	0.196238	0.270243
28.6538	0.17742	0.258594
28.8462	0.216411	0.240874
29.0385	0.249474	0.249233
29.2308	0.212888	0.277556
29.4231	0.166197	0.289577
29.6154	0.157175	0.277414
29.8077	0.160295	0.255244
30	0.140255	0.261342
30.1923	0.118136	0.293743
30.3846	0.133062	0.303627
30.5769	0.161813	0.302901
30.7692	0.182359	0.282086
30.9615	0.173541	0.241689
31.1538	0.140927	0.232009
31.3462	0.121754	0.227718
31.5385	0.164756	0.229881
31.7308	0.210055	0.268523
31.9231	0.222918	0.303131
32.1154	0.202843	0.309257
32.3077	0.17482	0.308069
32.5	0.135817	0.311163
32.6923	0.142041	0.284878
32.8846	0.183023	0.255146
33.0769	0.210285	0.249074
33.2692	0.183783	0.235156
33.4615	0.141773	0.207436
33.6538	0.123609	0.179893
33.8462	0.12241	0.149336
34.0385	0.108653	0.177553
34.2308	0.0984799	0.263913
34.4231	0.10158	0.271165
34.6154	0.131253	0.238737
34.8077	0.156259	0.255634
35	0.159779	0.278691
35.1923	0.138294	0.243489
35.3846	0.121499	0.217586
35.5769	0.123354	0.247841
35.7692	0.157717	0.293858
35.9615	0.198934	0.329149
36.1538	0.214728	0.336073
36.3462	0.263467	0.31571
36.5385	0.275259	0.285614
36.7308	0.203157	0.262282
36.9231	0.124408	0.232177
37.1154	0.149424	0.22669
37.3077	0.191783	0.24348
37.5	0.164019	0.242673
37.6923	0.11224	0.220148
37.8846	0.10362	0.223907
38.0769	0.095296	0.249659
38.2692	0.100065	0.261165
38.4615	0.162177	0.268239
38.6538	0.22058	0.26917
38.8462	0.211313	0.26394
39.0385	0.135232	0.22849
39.2308	0.0848097	0.176099
39.4231	0.0799576	0.13228
39.6154	0.103177	0.114329
39.8077	0.12695	0.095305
40	0.134852	0.076308
40.1923	0.118198	0.044368
40.3846	0.114593	0.042134
40.5769	0.0968386	0.09004
40.7692	0.0489977	0.15672
40.9615	0	0.184343
41.1538	0.0252458	0.184644
41.3462	0.0957545	0.163032
41.5385	0.123144	0.107423
41.7308	0.132318	0.07231
41.9231	0.148959	0.117192
42.1154	0.149804	0.181568
42.3077	0.129103	0.206913
42.5	0.0986956	0.190531
42.6923	0.116713	0.158183
42.8846	0.147917	0.195194
43.0769	0.142408	0.24684
43.2692	0.127886	0.20865
43.4615	0.156828	0.135551
43.6538	0.155408	0.106546
43.8462	0.119606	0.114223
44.0385	0.128138	0.141305
44.2308	0.198971	0.198234
44.4231	0.280824	0.247815
44.6154	0.30447	0.245608
44.8077	0.309565	0.249322
45	0.334599	0.264419
45.1923	0.41863	0.287201
45.3846	0.510531	0.329894
45.5769	0.551709	0.400998
45.7692	0.577933	0.482643
45.9615	0.62772	0.551841
46.1538	0.708941	0.641198
46.3462	0.821353	0.796066
46.5385	0.898219	0.944143
46.7308	0.964678	1
46.9231	0.98596	0.988095
47.1154	0.950393	0.958203
47.3077	0.906874	0.896362
47.5	0.900585	0.834938
47.6923	0.882172	0.77276
47.8846	0.787844	0.682597
48.0769	0.640815	0.580944
48.2692	0.515475	0.507083
48.4615	0.495879	0.430518
48.6538	0.520185	0.346613
48.8462	0.528449	0.290144
49.0385	0.48102	0.27198
49.2308	0.441224	0.255093
49.4231	0.416668	0.227647
49.6154	0.410515	0.231885
49.8077	0.439829	0.269223
50	0.443124	0.289142
50.1923	0.392455	0.27526
50.3846	0.366903	0.262025
50.5769	0.355224	0.286802
50.7692	0.328744	0.316685
50.9615	0.300264	0.313875
51.1538	0.275769	0.287955
51.3462	0.262848	0.270438
51.5385	0.279339	0.262965
51.7308	0.294845	0.227479
51.9231	0.309981	0.179104
52.1154	0.332241	0.14712
52.3077	0.352021	0.138025
52.5	0.375247	0.116306
52.6923	0.362347	0.099906
52.8846	0.301074	0.100996
53.0769	0.24072	0.088506
53.2692	0.209131	0.091804
53.4615	0.173712	0.102007
53.6538	0.151379	0.109728
53.8462	0.164769	0.118105
54.0385	0.215073	0.124222
54.2308	0.214726	0.122086
54.4231	0.182927	0.129018
54.6154	0.161537	0.112494
54.8077	0.146299	0.075218
55	0.138789	0.044155
55.1923	0.135811	0.055103
55.3846	0.179171	0.094259
55.5769	0.23118	0.078232
55.7692	0.23603	0.021346
55.9615	0.194417	0
56.1538	0.161051	0.048038
56.3462	0.134654	0.101741
56.5385	0.0960429	0.098993
56.7308	0.0708978	0.067035
56.9231	0.094686	0.054022
57.1154	0.115274	0.055059
57.3077	0.124596	0.061814
57.5	0.153431	0.069899
57.6923
57.8846
58.0769
58.2692
58.4615
58.6538
58.8462
59.0385
59.2308
59.4231
59.6154
59.8077
60
60.1923
60.3846
60.5769
60.7692
60.9615
61.1538
61.3462
61.5385
61.7308
61.9231
62.1154
62.3077
62.5
62.6923
62.8846
63.0769

## Sheet: IT-Cdc42, Cy3-Cdc42
	Cy3-Cdc42	IT-Cdc42
0	0.05074	0.135882
0.1923	0.087402	0.08261
0.3846	0.107059	0.054235
0.5769	0.093948	0.058157
0.7692	0.090646	0.072325
0.9615	0.111968	0.098704
1.1538	0.112514	0.100856
1.3462	0.109834	0.057762
1.5385	0.110724	0.041047
1.7308	0.083096	0.062941
1.9231	0.034892	0.062896
2.1154	0.020728	0.076052
2.3077	0.057085	0.149248
2.5	0.095479	0.202749
2.6923	0.085641	0.178913
2.8846	0.056128	0.174273
3.0769	0.05473	0.199369
3.2692	0.077076	0.134942
3.4615	0.085861	0.063261
3.6538	0.081277	0.096038
3.8462	0.100369	0.147345
4.0385	0.117748	0.079645
4.2308	0.095077	0.005312
4.4231	0.088857	0.057867
4.6154	0.121079	0.147411
4.8077	0.137692	0.125625
5	0.099891	0.065706
5.1923	0.07767	0.051286
5.3846	0.091823	0.080742
5.5769	0.108485	0.115847
5.7692	0.098283	0.126627
5.9615	0.08477	0.149154
6.1538	0.079918	0.177213
6.3462	0.102695	0.158682
6.5385	0.117318	0.108433
6.7308	0.153636	0.108374
6.9231	0.208232	0.175427
7.1154	0.221534	0.23472
7.3077	0.183896	0.1929
7.5	0.173943	0.123853
7.6923	0.204337	0.122612
7.8846	0.216893	0.206793
8.0769	0.204423	0.264817
8.2692	0.203571	0.248896
8.4615	0.238052	0.218211
8.6538	0.258637	0.207498
8.8462	0.264637	0.189213
9.0385	0.257555	0.219498
9.2308	0.292811	0.249452
9.4231	0.372251	0.20714
9.6154	0.379275	0.185839
9.8077	0.31109	0.194154
10	0.282428	0.204538
10.1923	0.313951	0.239028
10.3846	0.318391	0.223718
10.5769	0.31797	0.224269
10.7692	0.325645	0.296386
10.9615	0.31754	0.410153
11.1538	0.290543	0.436671
11.3462	0.276724	0.35335
11.5385	0.313693	0.28076
11.7308	0.343761	0.25479
11.9231	0.359542	0.225063
12.1154	0.376414	0.22034
12.3077	0.418646	0.2939
12.5	0.474448	0.410578
12.6923	0.512326	0.456785
12.8846	0.504976	0.474224
13.0769	0.511044	0.472374
13.2692	0.589134	0.505735
13.4615	0.657234	0.501297
13.6538	0.639673	0.517947
13.8462	0.62327	0.594001
14.0385	0.655808	0.617815
14.2308	0.715936	0.575946
14.4231	0.74032	0.54741
14.6154	0.753431	0.564226
14.8077	0.761613	0.577812
15	0.722797	0.534109
15.1923	0.689743	0.536925
15.3846	0.717438	0.566216
15.5769	0.766743	0.611448
15.7692	0.809568	0.708947
15.9615	0.815482	0.772923
16.1538	0.774638	0.755652
16.3462	0.757469	0.723889
16.5385	0.801769	0.755847
16.7308	0.911784	0.820652
16.9231	1	0.865407
17.1154	0.959117	0.841419
17.3077	0.903478	0.792979
17.5	0.907631	0.792325
17.6923	0.939336	0.825415
17.8846	0.956141	0.813098
18.0769	0.967405	0.781758
18.2692	0.927527	0.754219
18.4615	0.85447	0.748654
18.6538	0.870787	0.762239
18.8462	0.954524	0.796469
19.0385	0.964677	0.790316
19.2308	0.900157	0.680986
19.4231	0.828861	0.595112
19.6154	0.76925	0.657095
19.8077	0.742971	0.690009
20	0.775001	0.637163
20.1923	0.825004	0.624183
20.3846	0.826583	0.716904
20.5769	0.782571	0.776135
20.7692	0.743842	0.726497
20.9615	0.728999	0.594236
21.1538	0.729391	0.535309
21.3462	0.747536	0.563022
21.5385	0.751766	0.573848
21.7308	0.73765	0.602103
21.9231	0.719735	0.613795
22.1154	0.703342	0.619815
22.3077	0.658373	0.653358
22.5	0.582454	0.656955
22.6923	0.490813	0.617256
22.8846	0.39007	0.554678
23.0769	0.312228	0.487359
23.2692	0.343024	0.468946
23.4615	0.426168	0.473198
23.6538	0.439537	0.437277
23.8462	0.340871	0.399328
24.0385	0.249737	0.413951
24.2308	0.230272	0.437496
24.4231	0.226367	0.398076
24.6154	0.211227	0.315375
24.8077	0.238119	0.289935
25	0.3024	0.333456
25.1923	0.339263	0.367409
25.3846	0.348843	0.363665
25.5769	0.379476	0.331911
25.7692	0.374462	0.31266
25.9615	0.319119	0.31161
26.1538	0.290342	0.315465
26.3462	0.316899	0.332124
26.5385	0.33755	0.412738
26.7308	0.345838	0.537518
26.9231	0.325933	0.586982
27.1154	0.279183	0.499147
27.3077	0.250493	0.357111
27.5	0.253345	0.261214
27.6923	0.239822	0.254183
27.8846	0.217955	0.265773
28.0769	0.197389	0.258377
28.2692	0.178546	0.286664
28.4615	0.163196	0.283648
28.6538	0.159052	0.293107
28.8462	0.174211	0.294192
29.0385	0.204863	0.275875
29.2308	0.203371	0.268393
29.4231	0.172651	0.262834
29.6154	0.137539	0.278412
29.8077	0.130285	0.310334
30	0.140745	0.31342
30.1923	0.172469	0.302223
30.3846	0.207993	0.306281
30.5769	0.186623	0.319786
30.7692	0.13195	0.289062
30.9615	0.088637	0.254136
31.1538	0.09857	0.211787
31.3462	0.110341	0.157808
31.5385	0.094254	0.115234
31.7308	0.05586	0.11776
31.9231	0.027619	0.131503
32.1154	0.021417	0.110109
32.3077	0.010202	0.152909
32.5	0.006766	0.194002
32.6923	0.061152	0.230338
32.8846	0.148669	0.275518
33.0769	0.18046	0.323471
33.2692	0.167455	0.345197
33.4615	0.177848	0.338942
33.6538	0.211553	0.346452
33.8462	0.219429	0.31551
34.0385	0.205849	0.256503
34.2308	0.196758	0.268444
34.4231	0.186518	0.37486
34.6154	0.161359	0.38333
34.8077	0.169981	0.265182
35	0.187331	0.183151
35.1923	0.177072	0.189971
35.3846	0.142764	0.231946
35.5769	0.101173	0.268049
35.7692	0.081478	0.298057
35.9615	0.118658	0.327246
36.1538	0.156602	0.393189
36.3462	0.163139	0.421402
36.5385	0.176048	0.336115
36.7308	0.215811	0.283033
36.9231	0.236492	0.335767
37.1154	0.243105	0.433936
37.3077	0.259929	0.487977
37.5	0.26057	0.446962
37.6923	0.26279	0.405343
37.8846	0.264216	0.43233
38.0769	0.249488	0.417715
38.2692	0.232903	0.329775
38.4615	0.23942	0.249267
38.6538	0.282744	0.230975
38.8462	0.276265	0.227818
39.0385	0.220281	0.263393
39.2308	0.167703	0.308865
39.4231	0.153913	0.33035
39.6154	0.166871	0.329964
39.8077	0.142343	0.32598
40	0.097967	0.268126
40.1923	0.095824	0.215459
40.3846	0.1442	0.250431
40.5769	0.164986	0.306288
40.7692	0.125251	0.289469
40.9615	0.079526	0.294885
41.1538	0.09947	0.360784
41.3462	0.141731	0.411865
41.5385	0.159224	0.437483
41.7308	0.162717	0.414942
41.9231	0.174134	0.350242
42.1154	0.198375	0.326863
42.3077	0.224692	0.408747
42.5	0.239019	0.477712
42.6923	0.254627	0.454571
42.8846	0.271614	0.430012
43.0769	0.270016	0.471842
43.2692	0.264666	0.508928
43.4615	0.249459	0.463129
43.6538	0.207074	0.342075
43.8462	0.198844	0.268917
44.0385	0.206509	0.21875
44.2308	0.175646	0.213795
44.4231	0.155004	0.245853
44.6154	0.146305	0.25349
44.8077	0.126974	0.236089
45	0.118916	0.218376
45.1923	0.109863	0.239633
45.3846	0.100991	0.27864
45.5769	0.118179	0.287235
45.7692	0.174536	0.263254
45.9615	0.214223	0.285651
46.1538	0.221448	0.34082
46.3462	0.251938	0.382204
46.5385	0.311951	0.408734
46.7308	0.384156	0.457976
46.9231	0.466247	0.512711
47.1154	0.492746	0.547978
47.3077	0.456524	0.57536
47.5	0.412751	0.567022
47.6923	0.39119	0.465512
47.8846	0.400645	0.394406
48.0769	0.442446	0.45801
48.2692	0.473759	0.605933
48.4615	0.523762	0.650369
48.6538	0.606599	0.551548
48.8462	0.658861	0.459046
49.0385	0.662737	0.537891
49.2308	0.698605	0.674649
49.4231	0.739133	0.706834
49.6154	0.792648	0.74388
49.8077	0.837321	0.778503
50	0.826928	0.736544
50.1923	0.773336	0.654482
50.3846	0.735037	0.683085
50.5769	0.768102	0.804682
50.7692	0.813205	0.912882
50.9615	0.822306	0.863559
51.1538	0.834096	0.694166
51.3462	0.892568	0.672239
51.5385	0.92657	0.883575
51.7308	0.900559	1
51.9231	0.881773	0.946874
52.1154	0.873294	0.915345
52.3077	0.823712	0.882201
52.5	0.748493	0.816381
52.6923	0.692968	0.765214
52.8846	0.688164	0.68658
53.0769	0.734808	0.651911
53.2692	0.731659	0.645963
53.4615	0.648353	0.606518
53.6538	0.571267	0.569528
53.8462	0.553247	0.563567
54.0385	0.533466	0.585797
54.2308	0.515484	0.6172
54.4231	0.532471	0.600643
54.6154	0.556137	0.581495
54.8077	0.535926	0.596374
55	0.496746	0.610923
55.1923	0.493282	0.623268
55.3846	0.523963	0.64112
55.5769	0.530892	0.626376
55.7692	0.519341	0.555726
55.9615	0.509101	0.513144
56.1538	0.505512	0.51347
56.3462	0.464764	0.514092
56.5385	0.430465	0.494093
56.7308	0.412454	0.46701
56.9231	0.369198	0.451465
57.1154	0.381046	0.45178
57.3077	0.458868	0.455908
57.5	0.47774	0.434254
57.6923	0.413938	0.373326
57.8846	0.367696	0.347396
58.0769	0.35492	0.400574
58.2692	0.3122	0.441531
58.4615	0.269642	0.432861
58.6538	0.264771	0.434155
58.8462	0.283787	0.373646
59.0385	0.266178	0.30446
59.2308	0.24877	0.267842
59.4231	0.249316	0.188786
59.6154	0.239602	0.136229
59.8077	0.229123	0.143511
60	0.225802	0.162247
60.1923	0.184173	0.209445
60.3846	0.129117	0.295175
60.5769	0.148468	0.351694
60.7692	0.218883	0.294929
60.9615	0.244971	0.230035
61.1538	0.201189	0.254855
61.3462	0.146506	0.249018
61.5385	0.124007	0.186641
61.7308	0.115614	0.117214
61.9231	0.128744	0.153027
62.1154	0.147339	0.233721
62.3077	0.144257	0.244205
62.5	0.114035	0.186077
62.6923	0.095661	0.128597
62.8846	0.110781	0.134613
63.0769	0.128802	0.164551
63.2692	0.134161	0.222113
63.4615	0.13974	0.261808
63.6538	0.13017	0.220848
63.8462	0.095135	0.111496
64.0385	0.060396	0.091863
64.2308	0.049582	0.144072
64.4231	0.040739	0.155476
64.6154	0.03916	0.171375
64.8077	0.059056	0.175822
65	0.080081	0.131337
65.1923	0.094962	0.082963
65.3846	0.102264	0.051773
65.5769	0.095575	0.019965
65.7692	0.069573	0
65.9615	0.045677	0.067037
66.1538	0.013312	0.140072
66.3462	0	0.123202
66.5385	0.013293	0.132434
66.7308	0.028193	0.255263

## Sheet: IT-Rho, Cy3-Rho
	Cy3-Rho	IT-Rho
0	0.181054	0.299801
0.1923	0.171938	0.319697
0.3846	0.175189	0.363169
0.5769	0.192166	0.386591
0.7692	0.211894	0.456959
0.9615	0.207689	0.499522
1.1538	0.191895	0.489874
1.3462	0.218886	0.427829
1.5385	0.243475	0.358997
1.7308	0.255541	0.346601
1.9231	0.22756	0.375406
2.1154	0.221266	0.425096
2.3077	0.206606	0.437072
2.5	0.205936	0.428508
2.6923	0.207782	0.435549
2.8846	0.232014	0.415362
3.0769	0.277116	0.39009
3.2692	0.291605	0.397075
3.4615	0.302254	0.414309
3.6538	0.286894	0.424347
3.8462	0.276973	0.40218
4.0385	0.24701	0.382677
4.2308	0.253125	0.375982
4.4231	0.253731	0.394903
4.6154	0.3037	0.44862
4.8077	0.321626	0.495896
5	0.370177	0.507086
5.1923	0.362971	0.488878
5.3846	0.333065	0.486722
5.5769	0.27894	0.468078
5.7692	0.265078	0.472465
5.9615	0.288092	0.490101
6.1538	0.303729	0.513845
6.3462	0.303936	0.546582
6.5385	0.307122	0.574702
6.7308	0.32231	0.591743
6.9231	0.343407	0.578733
7.1154	0.347776	0.548735
7.3077	0.346015	0.515288
7.5	0.322231	0.51381
7.6923	0.339558	0.539969
7.8846	0.399284	0.52213
8.0769	0.44001	0.542852
8.2692	0.45544	0.552416
8.4615	0.471797	0.577025
8.6538	0.531481	0.535026
8.8462	0.576262	0.506795
9.0385	0.611962	0.498708
9.2308	0.664547	0.585457
9.4231	0.729192	0.687853
9.6154	0.780145	0.767532
9.8077	0.85218	0.817082
10	0.911593	0.855741
10.1923	0.919604	0.859803
10.3846	0.874082	0.825916
10.5769	0.850826	0.798739
10.7692	0.8658	0.766768
10.9615	0.861866	0.75458
11.1538	0.835403	0.78386
11.3462	0.791142	0.737304
11.5385	0.773873	0.665302
11.7308	0.776296	0.638187
11.9231	0.75346	0.667699
12.1154	0.656472	0.627138
12.3077	0.567873	0.572732
12.5	0.518909	0.550129
12.6923	0.469125	0.521116
12.8846	0.410987	0.460835
13.0769	0.373405	0.369698
13.2692	0.335638	0.322807
13.4615	0.274186	0.305732
13.6538	0.23515	0.297246
13.8462	0.217489	0.284306
14.0385	0.227702	0.273285
14.2308	0.222706	0.248564
14.4231	0.220475	0.180585
14.6154	0.209207	0.131327
14.8077	0.204382	0.131026
15	0.190904	0.169155
15.1923	0.176122	0.200528
15.3846	0.165438	0.189134
15.5769	0.147392	0.191637
15.7692	0.139374	0.232363
15.9615	0.15737	0.26989
16.1538	0.174483	0.238361
16.3462	0.164148	0.170136
16.5385	0.18305	0.20476
16.7308	0.223447	0.243638
16.9231	0.252448	0.215825
17.1154	0.256397	0.190934
17.3077	0.255691	0.228091
17.5	0.263659	0.267681
17.6923	0.25964	0.236293
17.8846	0.245399	0.229253
18.0769	0.22488	0.295482
18.2692	0.211666	0.305807
18.4615	0.232185	0.294983
18.6538	0.250602	0.272735
18.8462	0.24773	0.273168
19.0385	0.270986	0.290702
19.2308	0.319979	0.319307
19.4231	0.353178	0.313805
19.6154	0.384431	0.263781
19.8077	0.389328	0.219888
20	0.385557	0.238147
20.1923	0.326451	0.262396
20.3846	0.292119	0.325854
20.5769	0.25954	0.323316
20.7692	0.203812	0.27255
20.9615	0.15407	0.18635
21.1538	0.117978	0.146695
21.3462	0.103374	0.108513
21.5385	0.076761	0.130125
21.7308	0.057774	0.154719
21.9231	0.066212	0.152414
22.1154	0.075635	0.109755
22.3077	0.061758	0.100899
22.5	0.042322	0.119428
22.6923	0.066654	0.105683
22.8846	0.108926	0.114262
23.0769	0.138911	0.148448
23.2692	0.142417	0.222074
23.4615	0.140186	0.246357
23.6538	0.136701	0.235471
23.8462	0.140393	0.176519
24.0385	0.111136	0.135862
24.2308	0.112746	0.134307
24.4231	0.112105	0.14356
24.6154	0.139524	0.175416
24.8077	0.1309	0.168996
25	0.121078	0.154705
25.1923	0.10651	0.165828
25.3846	0.088642	0.217667
25.5769	0.085492	0.253678
25.7692	0.091714	0.170006
25.9615	0.084102	0.065164
26.1538	0.066284	0
26.3462	0.044823	0.00183
26.5385	0.016257	0.027603
26.7308	0	0.086521
26.9231	0.018481	0.126987
27.1154	0.079783	0.165086
27.3077	0.11951	0.174856
27.5	0.132418	0.177776
27.6923	0.138668	0.195253
27.8846	0.148789	0.237425
28.0769	0.146159	0.270917
28.2692	0.126046	0.227689
28.4615	0.11817	0.165082
28.6538	0.12415	0.142752
28.8462	0.149708	0.143644
29.0385	0.152089	0.161736
29.2308	0.154412	0.183385
29.4231	0.148504	0.226376
29.6154	0.175474	0.242707
29.8077	0.205572	0.282297
30	0.186165	0.260786
30.1923	0.145254	0.255038
30.3846	0.110558	0.240073
30.5769	0.124849	0.225583
30.7692	0.150058	0.209487
30.9615	0.178831	0.188597
31.1538	0.183057	0.200184
31.3462	0.164533	0.193222
31.5385	0.136003	0.21494
31.7308	0.15355	0.174885
31.9231	0.208737	0.182586
32.1154	0.272084	0.257372
32.3077	0.329323	0.356205
32.5	0.350398	0.39394
32.6923	0.350819	0.377684
32.8846	0.35615	0.359061
33.0769	0.372001	0.363949
33.2692	0.39617	0.353548
33.4615	0.371524	0.322941
33.6538	0.338474	0.283602
33.8462	0.325125	0.286342
34.0385	0.335823	0.318438
34.2308	0.359022	0.341301
34.4231	0.352088	0.393182
34.6154	0.325724	0.447118
34.8077	0.291762	0.482386
35	0.281178	0.471047
35.1923	0.294271	0.527834
35.3846	0.323785	0.57873
35.5769	0.32603	0.665974
35.7692	0.326016	0.634369
35.9615	0.331661	0.556072
36.1538	0.335659	0.466985
36.3462	0.296787	0.448269
36.5385	0.272732	0.484157
36.7308	0.252969	0.494598
36.9231	0.235243	0.523833
37.1154	0.208402	0.483812
37.3077	0.199314	0.433682
37.5	0.196357	0.393056
37.6923	0.1962	0.328763
37.8846	0.184026	0.301024
38.0769	0.163585	0.323283
38.2692	0.121663	0.371034
38.4615	0.129082	0.341384
38.6538	0.144947	0.308963
38.8462	0.18062	0.281413
39.0385	0.208188	0.297425
39.2308	0.22741	0.308526
39.4231	0.216427	0.265497
39.6154	0.191111	0.232016
39.8077	0.180192	0.253299
40	0.186528	0.323062
40.1923	0.179893	0.299332
40.3846	0.176578	0.232995
40.5769	0.180947	0.176678
40.7692	0.175409	0.197399
40.9615	0.163806	0.232983
41.1538	0.181831	0.241929
41.3462	0.224345	0.219653
41.5385	0.236134	0.212273
41.7308	0.204432	0.21229
41.9231	0.181567	0.206943
42.1154	0.16881	0.183234
42.3077	0.175146	0.223587
42.5	0.219192	0.313009
42.6923	0.310471	0.37755
42.8846	0.391216	0.403583
43.0769	0.495852	0.414606
43.2692	0.582142	0.480079
43.4615	0.664148	0.544888
43.6538	0.693948	0.601535
43.8462	0.762597	0.665945
44.0385	0.82236	0.855072
44.2308	0.875772	0.963386
44.4231	0.903511	1
44.6154	0.938114	0.953922
44.8077	0.96323	0.976989
45	0.941542	0.9834
45.1923	0.937487	0.921406
45.3846	0.962282	0.834445
45.5769	1	0.816622
45.7692	0.950366	0.868865
45.9615	0.91175	0.902305
46.1538	0.908536	0.945326
46.3462	0.881445	0.92333
46.5385	0.807093	0.910368
46.7308	0.727211	0.836118
46.9231	0.727353	0.78768
47.1154	0.744815	0.771906
47.3077	0.766475	0.787576
47.5	0.73659	0.764377
47.6923	0.67397	0.662024
47.8846	0.574302	0.591804
48.0769	0.510249	0.572671
48.2692	0.484912	0.610542
48.4615	0.459709	0.605563
48.6538	0.429974	0.532667
48.8462	0.449852	0.474922
49.0385	0.502487	0.50648
49.2308	0.51315	0.547553
49.4231	0.460964	0.495856
49.6154	0.459189	0.397267
49.8077	0.47266	0.394857
50	0.467571	0.460701
50.1923	0.43254	0.503704
50.3846	0.424052	0.469817
50.5769	0.424201	0.461574
50.7692	0.42661	0.503106
50.9615	0.421044	0.560741
51.1538	0.421172	0.573097
51.3462	0.384681	0.570723
51.5385	0.352608	0.570177
51.7308	0.325453	0.557149
51.9231	0.346649	0.49181
52.1154	0.339586	0.433423
52.3077	0.341176	0.454875
52.5	0.33727	0.502584
52.6923	0.3334	0.534523
52.8846	0.325788	0.515047
53.0769	0.324419	0.48186
53.2692	0.309274	0.438893
53.4615	0.28487	0.436227
53.6538	0.282846	0.440908
53.8462	0.293345	0.468476
54.0385	0.284778	0.440703
