# Supplementary material for: Extraction of active RhoGTPases by RhoGDI regulates spatiotemporal patterning of RhoGTPases
Source: eLife. 2019 Oct 24;8:e50471. doi: 10.7554/eLife.50471 (PMC6910828; doi:10.7554/eLife.50471)
Supplement: Figure 2—source data 1. [file elife-50471-fig2-data1.xlsx]

## Sheet: IT-Rho (1)
control	ring	bg	ring-bg
1	858.001	542.157	315.844
7	800.278	348.449	451.829
8	1055.23	405.921	649.308
9	986.095	379.544	606.551
5	775.282	444.895	330.387
6	997.703	386.344	611.359
control + C3
13	453.822	405.047	48.775
16	352.369	265.036	87.333
19	432.54	364.209	68.331
24	354.59	347.807	6.783
25	563.15	351.891	211.259
IT-Rho N41V
2	1242.01	708.98	533.028
3	1383.73	713.035	670.697
4	1448.1	783.981	664.123
10	1311.37	557.07	754.296
11	1236.21	563.538	672.677
12	1072.62	416.326	656.298
IT-Rho N41V + C3
14	1338.7	508.486	830.211
15	1015.55	496.136	519.418
17	961.684	419.461	542.223
18	1109.8	444.119	665.676
20	1336.42	543.435	792.985
21	919.87	547.449	372.421

## Sheet: IT-Rho (2)
control	ring	bg	ring-bg
1	1379.94	338.858	1041.08
2	1209.7	352.64	857.059
3	806.069	303.091	502.978
4	726.668	307.952	418.716
5	1113.83	301.218	812.609
6	1291.15	300.674	990.477
control + C3
13	334.943	299.965	34.978
22	287.096	241.145	45.951
23	314.474	281.523	32.951
24	233.83	182.954	50.876
IT-Rho N41V
7	937.898	346.179	591.719
8	1189.87	367.455	822.411
9	1004.12	460.915	543.21
10	937.994	491.879	446.115
11	1541.61	563.707	977.899
12	1698.95	580.378	1118.57
IT-Rho N41V + C3
14	DEAD
15	976.216	413.823	562.393
16	539.004	321.964	217.04
17	575.027	382.255	192.772
20	535.828	337.677	198.151
21	574.523	395.677	178.846

## Sheet: mCh-Rho (1)
control		bg	ring	bg-ring
1		475.132	823.617	348.485
2		458.104	766.765	308.661
22		421.453	657.613	236.16
23		416.318	632.405	216.087
24		398.795	632.405	233.61
25		434.45	622.846	188.396
control + C3
9		551.41	568.654	17.244
10		556.416	605.166	48.75
18		386.409	411.483	25.074
19		413.601	447.57	33.969
20		414.688	434.449	19.761
21		411.011	438.505	27.494
mCh-Rho N41V
3		500.844	1110.14	609.301
4		493.292	826.734	333.442
5		455.389	871.285	415.896
6		411.661	659.875	248.214
7		367.344	661.013	293.669
8		371.25	665.753	294.503
mCh-Rho N41V + C3
11		340.873	355.541	14.668
12		329.693	392.697	63.004
13		370.255	407.98	37.725
14		388.955	399.96	11.005
15		389.202	446.284	57.082
16		406.618	454.198	47.58

## Sheet: mCh-Rho (2)
control		bg	ring	ring-bg
1		534.127	1190.08	655.955
2		553.75	1224.02	670.265
17		465.598	1208.07	742.47
18		482.592	1719.27	1236.68
19		482.592	1064.71	582.123
20		520.983	1329.87	808.884
control + C3
5		477.391	734.928	257.537
6		413.512	424.894	11.382
11		355.344	384.764	29.42
12		262.866	329.846	66.98
15		364.761	425.466	60.705
16		366.363	387.019	20.656
mCh-Rho N41V
21		459.911	1027.77	567.862
23		469.895	819.339	349.444
25		531.82	1383.29	851.466
3		499.653	1520.92	1021.27
4		481.304	1011.19	529.887
mCh-Rho N41V + C3
7		522.24	713.802	191.562
8		474.803	719.111	244.308
9		378.057	637.281	259.224
10		474.912	551.514	76.602
13		432.552	437.153	4.601
14		406.777	415.508	8.731
