# Supplementary material for: Extraction of active RhoGTPases by RhoGDI regulates spatiotemporal patterning of RhoGTPases
Source: eLife. 2019 Oct 24;8:e50471. doi: 10.7554/eLife.50471 (PMC6910828; doi:10.7554/eLife.50471)
Supplement: Figure 3—source data 1. [file elife-50471-fig3-data1.xlsx]

## Sheet: expt1
CY3-CDC42 CONTROL			Cdc42 ring	Cdc42 bg	wGBD ring	wGBD bg	Cdc42 Corr	wGBD Corr	Ratio
Cy3Cdc42eGFPwGBD-001com			123.62	64.515	99.817	32.67	59.105	67.147	1.13606
Cy3Cdc42eGFPwGBD-002com			110.424	54.887	97.092	30.77	55.537	66.322	1.19419
Cy3Cdc42eGFPwGBD-003com			89.673	45.513	82.306	31.536	44.16	50.77	1.14968
Cy3Cdc42eGFPwGBD-004com			121.474	52.447	108.438	32.102	69.027	76.336	1.10589
Cy3Cdc42eGFPwGBD-005com			128.676	57.54	181.175	47.107	71.136	134.068	1.88467
Cy3Cdc42eGFPwGBD-006com			96.373	42.088	155.12	37.474	54.285	117.646	2.16719
Cy3Cdc42eGFPwGBD-007com			99.641	52.161	136.312	42.975	47.48	93.337	1.96582
Cy3Cdc42eGFPwGBD-008com			114.64	52.475	130.715	35.815	62.165	94.9	1.52658
average							57.8619	87.5657	1.51336
std dev							9.52177	28.0373
CY3-CDC42 ABR 50 NG/UL
Cy3Cdc42eGFPwGBDAbr50-009com			78.105	40.779	97.629	36.056	37.326	61.573	1.6496
Cy3Cdc42eGFPwGBDAbr50-010com			76.223	41.702	106.279	39.071	34.521	67.208	1.94687
Cy3Cdc42eGFPwGBDAbr50-011com			97.298	48.122	144.733	42.199	49.176	102.534	2.08504
Cy3Cdc42eGFPwGBDAbr50-012com			85.596	44.339	130.715	39.766	41.257	90.949	2.20445
Cy3Cdc42eGFPwGBDAbr50-014com			82.448	44.962	60.387	32.527	37.486	27.86	0.743211
Cy3Cdc42eGFPwGBDAbr50-015com			124.53	66.379	88.443	37.392	58.151	51.051	0.877904
average							42.9862	66.8625	1.55544
std dev							9.0025	27.0256
CY3-CDC42 ABR 100 NG/UL
Cy3Cdc42eGFPwGBDAbr100-017com			50.579	34.82	63.449	34.562	15.759	28.887	1.83305
Cy3Cdc42eGFPwGBDAbr100-018com			83.962	50.406	81.149	36.173	33.556	44.976	1.34033
Cy3Cdc42eGFPwGBDAbr100-019com			100.015	57.037	59.805	31.963	42.978	27.842	0.64782
Cy3Cdc42eGFPwGBDAbr100-020com			98.691	58.182	84.726	43.381	40.509	41.345	1.02064
Cy3Cdc42eGFPwGBDAbr100-021com			126.718	64.192	133.907	45.553	62.526	88.354	1.41308
Cy3Cdc42eGFPwGBDAbr100-022com			137.169	58.547	132.659	35.059	78.622	97.6	1.24138
Cy3Cdc42eGFPwGBDAbr100-023com			74.152	49.962	52.718	35.992	24.19	16.726	0.691443
Cy3Cdc42eGFPwGBDAbr100-024com			55.907	38.79	54.528	39.971	17.117	14.557	0.850441
average							39.4071	45.0359	1.14284
std dev							22.0653	31.4867
CY3-CDC42 ABR 500 NG/UL
Cy3Cdc42eGFPwGBDAbr500-025com			91.074	51.342	73.95	44.084	39.732	29.866	0.751686
Cy3Cdc42eGFPwGBDAbr500-026com			92.446	52.151	61.892	30.399	40.295	31.493	0.781561
Cy3Cdc42eGFPwGBDAbr500-027com			73.539	48.586	35.907	32.738	24.953	3.169	0.126999
Cy3Cdc42eGFPwGBDAbr500-028com			69.591	46.331	37.739	33.699	23.26	4.04	0.173689
Cy3Cdc42eGFPwGBDAbr500-029com			62.804	44.02	37.53	30.585	18.784	6.945	0.36973
Cy3Cdc42eGFPwGBDAbr500-030com			64.34	44.048	41.375	30.978	20.292	10.397	0.512369
Cy3Cdc42eGFPwGBDAbr500-031com			83.915	51.903	64.669	33.028	32.012	31.641	0.988411
Cy3Cdc42eGFPwGBDAbr500-032com			83.392	50.773	90.778	42.768	32.619	48.01	1.47184
average							28.9934	20.6951	0.713788
std dev							8.40445	16.6746

## Sheet: expt2
CY3-CDC42 CONTROL			Cdc42 ring	Cdc42 bg	wGBD ring	wGBD bg	Cdc42 Corr	wGBD Corr	Ratio
Cy3Cdc42eGFPwGBD-001com			98.275	56.621	76.087	37.648	41.654	38.439	0.922817
Cy3Cdc42eGFPwGBD-002com			54.35	36.767	62.71	34.203	17.583	28.507	1.62128
Cy3Cdc42eGFPwGBD-003com			100.295	66.101	65.442	33.501	34.194	31.941	0.934111
Cy3Cdc42eGFPwGBD-004com			100.864	62.916	88.58	38.289	37.948	50.291	1.32526
Cy3Cdc42eGFPwGBD-005com			66.382	42.289	97.457	36.174	24.093	61.283	2.5436
Cy3Cdc42eGFPwGBD-006com			77.064	49.474	91.291	39.052	27.59	52.239	1.8934
Cy3Cdc42eGFPwGBD-007com			89.801	51.068	48.568	23.985	38.733	24.583	0.634678
Cy3Cdc42eGFPwGBD-008com			90.032	58.891	55.786	26.513	31.141	29.273	0.940015
average							31.617	39.5695	1.25153
std dev							8.17757	13.4132
CY3-CDC42 ABR 500 NG/UL
Cy3Cdc42eGFPwGBDAbr50-009com			87.315	53.635	48.633	28.848	33.68	19.785	0.587441
Cy3Cdc42eGFPwGBDAbr50-010com			70.94	48.37	48.497	30.717	22.57	17.78	0.787771
Cy3Cdc42eGFPwGBDAbr50-011com			78.326	50.352	39.99	33.134	27.974	6.856	0.245085
Cy3Cdc42eGFPwGBDAbr50-012com			94.272	56.067	50.454	44.873	38.205	5.581	0.14608
Cy3Cdc42eGFPwGBDAbr50-013com			65.236	46.494	41.608	40.766	18.742	0.842	0.0449258
Cy3Cdc42eGFPwGBDAbr50-014com			62.356	52.632	34.692	33.715	9.724	0.977	0.100473
Cy3Cdc42eGFPwGBDAbr50-015com			71.807	59.339	34.817	33.457	12.468	1.36	0.109079
average							23.3376	7.59729	0.325539
std dev							10.6042	8.01258
CY3-CDC42 ABR 100 NG/UL
Cy3Cdc42eGFPwGBDAbr100-016com			89.877	57.823	73.429	28.285	32.054	45.144	1.40837
Cy3Cdc42eGFPwGBDAbr100-017com			81.399	52.344	69.894	32.272	29.055	37.622	1.29485
Cy3Cdc42eGFPwGBDAbr100-018com			109.848	74.049	56.608	37.043	35.799	19.565	0.546524
Cy3Cdc42eGFPwGBDAbr100-019com			95.489	65.16	70.068	41.997	30.329	28.071	0.92555
Cy3Cdc42eGFPwGBDAbr100-020com			91.33	49.537	36.567	11.719	41.793	24.848	0.594549
Cy3Cdc42eGFPwGBDAbr100-021com			114.147	65.24	105.67	44.462	48.907	61.208	1.25152
average							36.3228	36.0763	0.993214
std dev							7.68803	15.3558
CY3-CDC42 ABR 50 NG/UL
Cy3Cdc42eGFPwGBDAbr500-023com			72.069	43.86	69.124	37.073	28.209	32.051	1.1362
Cy3Cdc42eGFPwGBDAbr500-024com			59.633	40.824	34.823	26.828	18.809	7.995	0.425062
Cy3Cdc42eGFPwGBDAbr500-025com			41.685	32.146	47.759	27.496	9.539	20.263	2.12423
Cy3Cdc42eGFPwGBDAbr500-026com			44.112	31.437	54.859	29.672	12.675	25.187	1.98714
Cy3Cdc42eGFPwGBDAbr500-027com			83.987	53.078	82.942	31.316	30.909	51.626	1.67026
Cy3Cdc42eGFPwGBDAbr500-028com			85.496	53.876	58.331	23.914	31.62	34.417	1.08846
average							21.9602	28.5898	1.3019
std dev							9.62155	14.7083

## Sheet: exp3
CY3-CDC42 CONTROL				Cdc42 ring	Cdc42 bg	wGBD ring	wGBD bg	Cdc42 Corr	wGBD Corr	Ratio
Cy3Cdc42eGFPwGBD-001com				100.689	62.495	120.473	43.768	38.194	76.705	2.0083
Cy3Cdc42eGFPwGBD-002com				110.659	66.65	143.167	51.469	44.009	91.698	2.08362
Cy3Cdc42eGFPwGBD-003com				149.629	62.94	184.153	46.854	86.689	137.299	1.58381
Cy3Cdc42eGFPwGBD-004com				155.445	64.835	189.453	47.719	90.61	141.734	1.56422
Cy3Cdc42eGFPwGBD-005com				130.911	57.991	193.492	57.308	72.92	136.184	1.86758
Cy3Cdc42eGFPwGBD-006com				127.398	65.108	158.909	51.171	62.29	107.738	1.72962
Cy3Cdc42eGFPwGBD-009com				128.542	70.105	164.982	51.773	58.437	113.209	1.93728
Cy3Cdc42eGFPwGBD-010com				129.92	77.294	183.535	64.183	52.626	119.352	2.26793
average								63.2219	115.49	1.82674
std dev								18.9979	23.1244
CY3-CDC42 ABR 25 NG/UL
Cy3Cdc42eGFPwGBDAbr25-007com				145.583	76.904	139.467	49.566	68.679	89.901	1.309
Cy3Cdc42eGFPwGBDAbr25-008com				159.55	87.459	163.029	60.479	72.091	102.55	1.42251
Cy3Cdc42eGFPwGBDAbr25-011com				99.89	70.245	75.985	54.264	29.645	21.721	0.732704
Cy3Cdc42eGFPwGBDAbr25-012com				140.044	74.227	130.45	48.208	65.817	82.242	1.24956
Cy3Cdc42eGFPwGBDAbr25-013com				87.128	54.286	134.853	57.389	32.842	77.464	2.35869
Cy3Cdc42eGFPwGBDAbr25-014com				67.825	46.786	119.481	47.917	21.039	71.564	3.40149
Cy3Cdc42eGFPwGBDAbr25-015com				127.107	74.877	128.529	51.411	52.23	77.118	1.47651
Cy3Cdc42eGFPwGBDAbr25-016com				116.83	69.64	123.696	49.113	47.19	74.583	1.58048
average								48.6916	74.6429	1.53297
std dev								19.3971	23.5847
CY3-CDC42 ABR 50 NG/UL
Cy3Cdc42eGFPwGBDAbr50-017com				111.001	62.613	61.473	51.754	48.388	9.719	0.200856
Cy3Cdc42eGFPwGBDAbr50-018com				94.058	64.147	53.332	44.006	29.911	9.326	0.311792
Cy3Cdc42eGFPwGBDAbr50-019com				93.443	62.443	130.823	55.689	31	75.134	2.42368
Cy3Cdc42eGFPwGBDAbr50-020com				117.381	65.025	152.932	62.598	52.356	90.334	1.72538
Cy3Cdc42eGFPwGBDAbr50-021com				94.08	54.705	105.616	51.372	39.375	54.244	1.37763
Cy3Cdc42eGFPwGBDAbr50-022com				96.402	61.618	98.558	53.548	34.784	45.01	1.29399
Cy3Cdc42eGFPwGBDAbr50-023com				95.204	59.322	68.539	48.893	35.882	19.646	0.547517
average								38.8137	43.3447	1.11674
std dev								8.56856	32.1188
CY3-CDC42 ABR 100 NG/UL
Cy3Cdc42eGFPwGBDAbr100-025com				102.975	56.281	97.997	47.174	46.694	50.823	1.08843
Cy3Cdc42eGFPwGBDAbr100-026com				108.636	63.515	104.55	54.727	45.121	49.823	1.10421
Cy3Cdc42eGFPwGBDAbr100-027com				125.837	66.866	132.439	58.548	58.971	73.891	1.25301
Cy3Cdc42eGFPwGBDAbr100-028com				126.212	64.254	156.841	70.205	61.958	86.636	1.3983
Cy3Cdc42eGFPwGBDAbr100-029com				138.171	72.021	144.056	46.752	66.15	97.304	1.47096
Cy3Cdc42eGFPwGBDAbr100-030com				119.886	66.161	130.281	47.306	53.725	82.975	1.54444
Cy3Cdc42eGFPwGBDAbr100-031com				85.249	55.95	51.517	35.586	29.299	15.931	0.543739
Cy3Cdc42eGFPwGBDAbr100-032com				92.866	56.659	59.973	40.577	36.207	19.396	0.535698
Cy3Cdc42eGFPwGBDAbr100-033com				79.522	51.161	64.309	44.95	28.361	19.359	0.682592
Cy3Cdc42eGFPwGBDAbr100-034com				91.946	62.031	75.434	49.624	29.915	25.81	0.862778
average								45.6401	52.1948	1.14362
std dev								14.2722	31.2905
CY3-CDC42 ABR 500 NG/UL
Cy3Cdc42eGFPwGBDAbr500-035com				114.267	81.09	62.505	61.164	33.177	1.341	0.0404196
Cy3Cdc42eGFPwGBDAbr500-037com				141.841	80.129	130.07	55.988	61.712	74.082	1.20045
Cy3Cdc42eGFPwGBDAbr500-038com				127.005	74.856	103.231	47.759	52.149	55.472	1.06372
Cy3Cdc42eGFPwGBDAbr500-039com				128.741	70.252	142.997	53.99	58.489	89.007	1.52177
Cy3Cdc42eGFPwGBDAbr500-040com				104.42	73.813	70.252	66.906	30.607	3.346	0.109321
Cy3Cdc42eGFPwGBDAbr500-041com				99.138	72.15	63.552	60.784	26.988	2.768	0.102564
average								43.8537	37.6693	0.858978
std dev								15.3352	39.9858
