# Supplementary material for: Extraction of active RhoGTPases by RhoGDI regulates spatiotemporal patterning of RhoGTPases
Source: eLife. 2019 Oct 24;8:e50471. doi: 10.7554/eLife.50471 (PMC6910828; doi:10.7554/eLife.50471)
Supplement: Figure 4—source data 1. [file elife-50471-fig4-data1.xlsx]

## Sheet: Peak-to-peak calculations
movie #		rGBD to GDI		rGBD to wGBD		GDI to wGBD
8		2.641		3.251		0.599
7		2.612		3.607		0.967
6		1.779		2.543		0.802
5		0.173		1.071		0.898
4		3.238		3.58		0.619
3		1.809		2.887		1.232
2		2.497		3.224		0.772
4		2.802		3.443		0.962
5		3.526		4.717		1.129
8		1.41		3.015		1.919
9		2.447		3.583		1.194
10		3.735		5.038		2.106
11		1.717		2.319		0.694
13		2.943		5.321		2.395
14		2.895		5.182		2.168
15		2.325		2.813		0.311
average		2.40931		3.47463		1.17294
st dev		0.883695		1.13845		0.631721
			n=16

## Sheet: Radial reslice
	Active Cdc42	RhoGDI	Active Rho
0	0.0864198	0	0
0.1923	0.0987654	0.015625	0.0126582
0.3846	0.0987654	0.015625	0.0253165
0.5769	0.111111	0.015625	0.0253165
0.7692	0.111111	0.015625	0.0379747
0.9615	0.123457	0.015625	0.0506329
1.1538	0.135802	0.03125	0.0379747
1.3462	0.148148	0.046875	0.0506329
1.5385	0.160494	0.046875	0.0379747
1.7308	0.17284	0.046875	0.0506329
1.9231	0.185185	0.0625	0.0632911
2.1154	0.209877	0.078125	0.0886076
2.3077	0.222222	0.09375	0.0886076
2.5	0.234568	0.109375	0.101266
2.6923	0.246914	0.125	0.113924
2.8846	0.271605	0.125	0.126582
3.0769	0.283951	0.109375	0.151899
3.2692	0.308642	0.125	0.177215
3.4615	0.333333	0.15625	0.189873
3.6538	0.345679	0.1875	0.21519
3.8462	0.37037	0.1875	0.227848
4.0385	0.395062	0.203125	0.253165
4.2308	0.432099	0.21875	0.265823
4.4231	0.444444	0.25	0.265823
4.6154	0.469136	0.28125	0.278481
4.8077	0.493827	0.296875	0.316456
5	0.518519	0.328125	0.35443
5.1923	0.555556	0.34375	0.367089
5.3846	0.592593	0.375	0.405063
5.5769	0.617284	0.390625	0.43038
5.7692	0.641975	0.421875	0.443038
5.9615	0.666667	0.4375	0.468354
6.1538	0.703704	0.453125	0.506329
6.3462	0.728395	0.46875	0.544304
6.5385	0.777778	0.5	0.56962
6.7308	0.814815	0.53125	0.607595
6.9231	0.839506	0.53125	0.64557
7.1154	0.876543	0.5625	0.683544
7.3077	0.901235	0.59375	0.734177
7.5	0.938272	0.625	0.772152
7.6923	0.962963	0.640625	0.810127
7.8846	0.975309	0.65625	0.860759
8.0769	0.987654	0.6875	0.911392
8.2692	1	0.71875	0.936709
8.4615	1	0.75	0.962025
8.6538	1	0.75	0.974684
8.8462	0.987654	0.78125	0.974684
9.0385	0.987654	0.796875	0.974684
9.2308	0.975309	0.8125	0.987342
9.4231	0.962963	0.828125	1
9.6154	0.925926	0.859375	1
9.8077	0.901235	0.875	1
10	0.864198	0.875	1
10.1923	0.82716	0.890625	1
10.3846	0.790123	0.90625	0.974684
10.5769	0.740741	0.921875	0.949367
10.7692	0.703704	0.9375	0.936709
10.9615	0.641975	0.96875	0.924051
11.1538	0.580247	0.984375	0.911392
11.3462	0.530864	1	0.873418
11.5385	0.481481	1	0.835443
11.7308	0.444444	1	0.797468
11.9231	0.395062	0.984375	0.746835
12.1154	0.345679	0.984375	0.708861
12.3077	0.296296	0.96875	0.696203
12.5	0.259259	0.9375	0.658228
12.6923	0.234568	0.890625	0.607595
12.8846	0.209877	0.859375	0.556962
13.0769	0.185185	0.828125	0.518987
13.2692	0.160494	0.78125	0.493671
13.4615	0.148148	0.71875	0.455696
13.6538	0.123457	0.671875	0.43038
13.8462	0.0987654	0.625	0.392405
14.0385	0.0864198	0.59375	0.341772
14.2308	0.0740741	0.546875	0.278481
14.4231	0.0740741	0.5	0.240506
14.6154	0.0617284	0.46875	0.202532
14.8077	0.0493827	0.4375	0.177215
15	0.037037	0.40625	0.164557
15.1923	0.0246914	0.375	0.151899
15.3846	0.0246914	0.375	0.126582
15.5769	0.0123457	0.375	0.113924
15.7692	0.0123457	0.359375	0.101266
15.9615	0.0123457	0.34375	0.0886076
16.1538	0.0123457	0.3125	0.0886076
16.3462	0.0123457	0.3125	0.0886076
16.5385	0.0123457	0.328125	0.101266
16.7308	0	0.3125	0.101266
16.9231	0.0123457	0.296875	0.113924
17.1154	0	0.28125	0.113924
17.3077	0.0123457	0.265625	0.113924
