# Supplementary material for: Extraction of active RhoGTPases by RhoGDI regulates spatiotemporal patterning of RhoGTPases
Source: eLife. 2019 Oct 24;8:e50471. doi: 10.7554/eLife.50471 (PMC6910828; doi:10.7554/eLife.50471)
Supplement: Figure 5—figure supplement 2—source data 1. [file elife-50471-fig5-figsupp2-data1.xlsx]

## Sheet: 01.26.17
						Cdc42 R	Cdc42 BG	Rho R	Rho BG	Cdc42 R-BG	Rho R-BG
mRFPwGBDeGFP2xrGBDctrl001						76.361	47.972	97.748	29.22	28.389	68.528
mRFPwGBDeGFP2xrGBDctrl002						84.798	54.082	99.844	31.411	30.716	68.433
mRFPwGBDeGFP2xrGBDctrl003						86.58	34.099	83.213	22.283	52.481	60.93
mRFPwGBDeGFP2xrGBDctrl004						98.353	50.655	123.119	35.149	47.698	87.97
mRFPwGBDeGFP2xrGBDctrl005						98.499	50.928	119.43	34.184	47.571	85.246
mRFPwGBDeGFP2xrGBDctrl006						102.423	50.682	104.756	25.942	51.741	78.814
mRFPwGBDeGFP2xrGBDctrl007						72.129	42.946	87.91	26.332	29.183	61.578
mRFPwGBDeGFP2xrGBDctrl008						78.911	35.623	68.323	20.326	43.288	47.997
										41.3834	69.937
										10.3076	13.4958
mRFPwGBDeGFP2xrGBDFlagGDIWTProtein0.5x017						64.177	46.803	76.666	19.761	17.374	56.905		0.58017
mRFPwGBDeGFP2xrGBDFlagGDIWTProtein0.5x018						55.501	40.162	68.851	18.365	15.339	50.486		0.629344
mRFPwGBDeGFP2xrGBDFlagGDIWTProtein0.5x019						42.024	37.518	44.986	20.848	4.506	24.138		0.891116
mRFPwGBDeGFP2xrGBDFlagGDIWTProtein0.5x020						45.615	42.819	53.092	21.565	2.796	31.527		0.932437
mRFPwGBDeGFP2xrGBDFlagGDIWTProtein0.5x025						64.538	42.982	60.803	27.86	21.556	32.943		0.479114
										12.3142	39.1998
										8.24206	13.8359
mRFPwGBDeGFP2xrGBDFlagGDIWTProtein0.25x021						61.549	45.341	88.276	26.8	16.208	61.476		0.608345
mRFPwGBDeGFP2xrGBDFlagGDIWTProtein0.25x022						49.782	40.679	100.684	30.322	9.103	70.362		0.780032
mRFPwGBDeGFP2xrGBDFlagGDIWTProtein0.25x023						58.532	44.615	104.862	30.701	13.917	74.161		0.663706
mRFPwGBDeGFP2xrGBDFlagGDIWTProtein0.25x024						57.411	45.396	101.417	29.383	12.015	72.034		0.709666
										12.8107	69.5083
										3.00808	5.57594
mRFPwGBDeGFP2xrGBDFlagGDIWTProtein1x009						48.492	47.115	33.402	22.007	1.377	11.395		0.966726
mRFPwGBDeGFP2xrGBDFlagGDIWTProtein1x010						49.039	40.84	27.217	22.232	8.199	4.985		0.801877
mRFPwGBDeGFP2xrGBDFlagGDIWTProtein1x011						55.347	46.041	38.748	25.372	9.306	13.376		0.775127
mRFPwGBDeGFP2xrGBDFlagGDIWTProtein1x012						52.265	34.866	32.389	19.306	17.399	13.083		0.579565
										9.07025	10.7097
										6.56681	3.91508
mRFPwGBDeGFP2xrGBDFlagGDIWTProtein2x013						62.678	56.685	36.021	28.635	5.993	7.386		0.855183
mRFPwGBDeGFP2xrGBDFlagGDIWTProtein2x014						62.954	59.106	33.37	24.882	3.848	8.488		0.907016
mRFPwGBDeGFP2xrGBDFlagGDIWTProtein2x015						45.556	38.001	29.337	20.066	7.555	9.271		0.817439
mRFPwGBDeGFP2xrGBDFlagGDIWTProtein2x016						40.569	32.822	27.473	19.217	7.747	8.256		0.812799
										6.28575	8.35025
										1.80505	0.775761
Summary:
	Cdc42	Rho	% Change		T-test
Ctrl	41.3834	69.937	Cdc42	Rho	Cdc42	Rho
0.25	12.8107	69.5083	0.690437	0.00613052	4.88636e-05	0.939705
0.5	12.3142	39.1998	0.702436	0.439498	0.000215632	0.00387986
1	9.07025	10.7097	0.780824	0.846866	9.79455e-05	1.15995e-06
2	6.28575	8.35025	0.848109	0.880603	1.63403e-05	3.56993e-06
176uM protein, 40nL injections, 1x=7.04pmol protein injected, 0.25x=1.76pmol=1760fmol
Total GDI in oocyte 1195.54fmol, so with 0.25x injection with 2.5 fold change the amount of GDI over endogenous protein

## Sheet: 02.02.17
						Cdc42 R	Cdc42 BG	Rho R	Rho BG	Cdc42 R-BG	Rho R-BG
mRFPwGBDeGFP2xrGBDctrl001						117.642	53.726	119.004	26.725	63.916	92.279
mRFPwGBDeGFP2xrGBDctrl002						102.087	44.377	147.601	41.265	57.71	106.336
mRFPwGBDeGFP2xrGBDctrl019						77.772	53.133	120.963	35.642	24.639	85.321
mRFPwGBDeGFP2xrGBDctrl020						102.463	52.251	130.596	29.555	50.212	101.041
mRFPwGBDeGFP2xrGBDctrl021						118.818	35.226	80.854	22.987	83.592	57.867
mRFPwGBDeGFP2xrGBDctrl022						132.709	46.956	114.161	26.254	85.753	87.907
										60.9703	88.4585
										22.7197	16.9618
mRFPwGBDeGFP2xrGBDFlagGDIWTProtein0.5x003						60.404	47.947	85.664	22.56	12.457	63.104		0.795688
mRFPwGBDeGFP2xrGBDFlagGDIWTProtein0.5x004						61.4	48.687	81.946	22.051	12.713	59.895		0.791489
mRFPwGBDeGFP2xrGBDFlagGDIWTProtein0.5x005						50.846	40.792	58.979	28.942	10.054	30.037		0.8351
mRFPwGBDeGFP2xrGBDFlagGDIWTProtein0.5x006						171.625	72.304	137.826	34.667	99.321	103.159		-0.629005
mRFPwGBDeGFP2xrGBDFlagGDIWTProtein0.5x013						47.746	42.895	48.16	29.1	4.851	19.06		0.920437
mRFPwGBDeGFP2xrGBDFlagGDIWTProtein0.5x014						61.686	53.617	57.26	28.908	8.069	28.352		0.867657
mRFPwGBDeGFP2xrGBDFlagGDIWTProtein0.5x015						58.538	50.759	78.741	29.153	7.779	49.588		0.872413
mRFPwGBDeGFP2xrGBDFlagGDIWTProtein0.5x016						66.483	47.7	62.184	26.001	18.783	36.183		0.691932
mRFPwGBDeGFP2xrGBDFlagGDIWTProtein0.5x017						61.327	37.926	106.717	26.766	23.401	79.951		0.61619
mRFPwGBDeGFP2xrGBDFlagGDIWTProtein0.5x018						67.279	35.183	102.406	21.97	32.096	80.436		0.47358
										22.9524	54.9765
										28.0756	27.2576
mRFPwGBDeGFP2xrGBDFlagGDIWTProtein0.25007						90.411	35.157	90.895	25.536	55.254	65.359		0.093756
mRFPwGBDeGFP2xrGBDFlagGDIWTProtein0.25008						70.137	35.681	98.579	23.707	34.456	74.872		0.434873
mRFPwGBDeGFP2xrGBDFlagGDIWTProtein0.25023						155.475	79.012	231.087	39.053	76.463	192.034		-0.254102
mRFPwGBDeGFP2xrGBDFlagGDIWTProtein0.25024						170.248	80.461	178.181	35.793	89.787	142.388		-0.472634
mRFPwGBDeGFP2xrGBDFlagGDIWTProtein0.25025						117.73	53.992	159.337	34.377	63.738	124.96		-0.0453937
mRFPwGBDeGFP2xrGBDFlagGDIWTProtein0.25026						98.79	42.431	132.746	27.223	56.359	105.523		0.0756324
										62.6762	117.523
										19.0661	46.7111
mRFPwGBDeGFP2xrGBDFlagGDIWTProtein0.125009						137.157	54.7621	123.372	26.48	82.3949	96.892		-0.351393
mRFPwGBDeGFP2xrGBDFlagGDIWTProtein0.125010						179.947	61.704	136.949	31.385	118.243	105.564		-0.939353
mRFPwGBDeGFP2xrGBDFlagGDIWTProtein0.125011						92.542	48.675	109.382	24.982	43.867	84.4		0.280519
mRFPwGBDeGFP2xrGBDFlagGDIWTProtein0.125012						134.439	51.65	111.15	28.375	82.789	82.775		-0.357857
										81.8235	92.4077
										30.3773	10.8029
Summary:
	Cdc42	Rho	% Change		T-test
Ctrl	60.9703	88.4585	Cdc42	Rho	Cdc42	Rho
0.5	22.9524	54.9765	0.623548	0.378505	0.0114292	0.00907711
0.25	62.6762	117.523	-0.0279781	-0.328563	0.890846	0.199704
0.125	81.8235	92.4077	-0.342021	-0.0446452	0.291999	0.664868
176uM protein, 40nL injections, 1x=7.04pmol protein injected, 0.25x=1.76pmol=1760fmol
Total GDI in oocyte 1195.54fmol, so with 0.25x injection with 2.5 fold change the amount of GDI over endogenous protein

## Sheet: 02.9.17
						Cdc42 R	Cdc42 BG	Rho R	Rho BG	Cdc42 R-BG	Rho R-BG
mRFPwGBDeGFP2xrGBDctrl001												Crap coming out of wound
mRFPwGBDeGFP2xrGBDctrl002						159.028	57.117	166.508	36.344	101.911	130.164
mRFPwGBDeGFP2xrGBDctrl003						142.647	53.6	158.888	36.628	89.047	122.26
mRFPwGBDeGFP2xrGBDctrl004												Crap coming out of wound
mRFPwGBDeGFP2xrGBDctrl005						154.525	69.284	156.155	36.15	85.241	120.005
mRFPwGBDeGFP2xrGBDctrl006						148.389	61.506	168.02	37.754	86.883	130.266
mRFPwGBDeGFP2xrGBDctrl007												Crap coming out of wound
mRFPwGBDeGFP2xrGBDctrl008												Crap coming out of wound
mRFPwGBDeGFP2xrGBDctrl039						186.806	55.573	153.543	46.904	131.233	106.639
mRFPwGBDeGFP2xrGBDctrl040						168.629	44.964	135.045	28.426	123.665	106.619
mRFPwGBDeGFP2xrGBDctrl041						228.93	57.405	136.47	32.212	171.525	104.258
mRFPwGBDeGFP2xrGBDctrl042						163.968	37.339	133.198	31.211	126.629	101.987
										114.517	115.275
										29.7323	11.7414
mRFPwGBDeGFP2xrGBDProteinFlagGDIa20.75009						68.542	46.558	68.539	33.839	21.984	34.7		0.808028
mRFPwGBDeGFP2xrGBDProteinFlagGDIa20.75010						71.51	53.144	53.629	33.411	18.366	20.218		0.839622
mRFPwGBDeGFP2xrGBDProteinFlagGDIa20.75011						60.716	58.675	46.55	35.544	2.041	11.006		0.982177
mRFPwGBDeGFP2xrGBDProteinFlagGDIa20.75012						76.044	60.75	49.032	41.066	15.294	7.966		0.866447
mRFPwGBDeGFP2xrGBDProteinFlagGDIa20.75037						66.777	62.138	59.21	32.591	4.639	26.619		0.959491
mRFPwGBDeGFP2xrGBDProteinFlagGDIa20.75038						85.278	60.674	96.41	30.324	24.604	66.086		0.785149
										14.488	27.7658
										9.23193	21.2025
mRFPwGBDeGFP2xrGBDProteinFlagGDIa20.5013						51.303	42.67	79.272	30.355	8.633	48.917		0.924614
mRFPwGBDeGFP2xrGBDProteinFlagGDIa20.5014						48.197	47.791	85.67	25.081	0.406	60.589		0.996455
mRFPwGBDeGFP2xrGBDProteinFlagGDIa20.5015
mRFPwGBDeGFP2xrGBDProteinFlagGDIa20.5016						108.542	60.806	73.564	24.421	47.736	49.143		0.583153
mRFPwGBDeGFP2xrGBDProteinFlagGDIa20.5017						110.991	65.472	100.812	36.241	45.519	64.571		0.602512
mRFPwGBDeGFP2xrGBDProteinFlagGDIa20.5018						103.521	54.581	96.576	40.215	48.94	56.361		0.572639
										30.2468	55.9162
										23.6969	6.92466
mRFPwGBDeGFP2xrGBDProteinFlagGDIa20.25019						107.377	57.321	149.787	34.276	50.056	115.511		0.562894
mRFPwGBDeGFP2xrGBDProteinFlagGDIa20.25020						94.459	63.392	126.855	39.124	31.067	87.731		0.728712
mRFPwGBDeGFP2xrGBDProteinFlagGDIa20.25021						166.893	79.233	193.576	39.345	87.66	154.231		0.234522
mRFPwGBDeGFP2xrGBDProteinFlagGDIa20.25022						182.959	76.74	149.891	32.221	106.219	117.67		0.0724588
mRFPwGBDeGFP2xrGBDProteinFlagGDIa20.25023						77.219	42.969	94.096	31.193	34.25	62.903		0.700917
mRFPwGBDeGFP2xrGBDProteinFlagGDIa20.25024						112.749	50.711	120.116	32.742	62.038	87.374		0.458263
										61.8817	104.237
										29.9441	31.8505
mRFPwGBDeGFP2xrGBDProteinFlagGDIa20.125025						144.242	46.431	129.966	36.289	97.811	93.677		0.14588
mRFPwGBDeGFP2xrGBDProteinFlagGDIa20.125026						145.391	1.665	186.147	36.12	143.726	150.027		-0.255065
mRFPwGBDeGFP2xrGBDProteinFlagGDIa20.125027						196.321	68.853	189.5	55.961	127.468	133.539		-0.113095
mRFPwGBDeGFP2xrGBDProteinFlagGDIa20.125028						164.409	59.291	123.501	28.321	105.118	95.18		0.0820731
mRFPwGBDeGFP2xrGBDProteinFlagGDIa20.125029						151.234	54.391	137.424	29.932	96.843	107.492		0.154333
mRFPwGBDeGFP2xrGBDProteinFlagGDIa20.125030						190.811	58.627	163.335	29.341	132.184	133.994		-0.154277
										117.192	118.985
										19.8489	23.4092
mRFPwGBDeGFP2xrGBDProteinFlagGDIa20.0675031
mRFPwGBDeGFP2xrGBDProteinFlagGDIa20.0675032						110.402	48.351	116.367	30.824	62.051	85.543		0.458149
mRFPwGBDeGFP2xrGBDProteinFlagGDIa20.0675033						162.615	66.061	181.888	43.288	96.554	138.6		0.156857
mRFPwGBDeGFP2xrGBDProteinFlagGDIa20.0675034						164.275	50.991	134.934	27.573	113.284	107.361		0.0107648
mRFPwGBDeGFP2xrGBDProteinFlagGDIa20.0675035						168.568	51.368	139.981	27.044	117.2	112.937		-0.0234311
mRFPwGBDeGFP2xrGBDProteinFlagGDIa20.0675036						180.963	61.804	110.666	25.601	119.159	85.065		-0.0405377
										101.65	105.901
										23.863	22.1892
Summary:
	Cdc42	Rho	% Change		T-test
Ctrl	114.517	115.275
0.75	14.488	27.7658	0.873486	0.759133	1.10073e-05	3.05469e-05
0.5	30.2468	55.9162	0.735874	0.514931	0.00020328	1.86543e-07
0.25	61.8817	104.237	0.459628	0.0957546	0.00764148	0.449436
0.125	117.192	118.985	-0.0233583	-0.0321847	0.843682	0.732439
0.0675	101.65	105.901	0.11236	0.0813149	0.410284	0.420393

## Sheet: 02.12.17
						Cdc42 R	Cdc42 BG	Rho R	Rho BG	Cdc42 R-BG	Rho R-BG
mRFPwGBDeGFP2xrGBDctrl001						167.42	63.968	183.614	42.579	103.452	141.035
mRFPwGBDeGFP2xrGBDctrl002						130.553	49.278	174.924	43.605	81.275	131.319
mRFPwGBDeGFP2xrGBDctrl003						198.455	61	125.951	35.479	137.455	90.472
mRFPwGBDeGFP2xrGBDctrl004						132.714	45.912	177.856	37.334	86.802	140.522
mRFPwGBDeGFP2xrGBDctrl028						148.01	63.256	215.182	55.861	84.754	159.321
mRFPwGBDeGFP2xrGBDctrl029						149.362	62.297	204.369	45.57	87.065	158.799
										96.8005	136.911
										21.3445	25.295
mRFPwGBDeGFP2xrGBDProteinFlagGDIa20.5005						56.613	54.591	62.416	35.119	2.022	27.297		0.979112
mRFPwGBDeGFP2xrGBDProteinFlagGDIa20.5006						51.817	40.177	68.908	35.293	11.64	33.615		0.879753
mRFPwGBDeGFP2xrGBDProteinFlagGDIa20.525						82.322	53.798	214.095	43.936	28.524	170.159		0.705332
mRFPwGBDeGFP2xrGBDProteinFlagGDIa20.526						82.442	48.725	169.189	39.655	33.717	129.534		0.651686
mRFPwGBDeGFP2xrGBDProteinFlagGDIa20.527						46.331	29.88	49.855	42.127	16.451	7.728		0.830053
										18.4708	73.6666
										12.7947	71.6487
mRFPwGBDeGFP2xrGBDProteinFlagGDIa20.25007						80.386	60.078	174.961	42.194	20.308	132.767		0.790208
mRFPwGBDeGFP2xrGBDProteinFlagGDIa20.25008						64.813	45.265	162.301	40.216	19.548	122.085		0.798059
mRFPwGBDeGFP2xrGBDProteinFlagGDIa20.25021						85.262	58.647	145.533	53.652	26.615	91.881		0.725053
mRFPwGBDeGFP2xrGBDProteinFlagGDIa20.25022						98.478	59.98	175.733	52.377	38.498	123.356		0.602295
mRFPwGBDeGFP2xrGBDProteinFlagGDIa20.25023						55.497	44.72	63.366	30.922	10.777	32.444		0.888668
mRFPwGBDeGFP2xrGBDProteinFlagGDIa20.25024						53.827	50.641	30.89	28.193	3.186	2.697		0.967087
										19.822	84.205
										12.2786	54.2359
mRFPwGBDeGFP2xrGBDProteinFlagGDIa20.125009						73.42	48.77	133.11	36.334	24.65	96.776		0.745353
mRFPwGBDeGFP2xrGBDProteinFlagGDIa20.125010						78.232	50.279	154.14	31.043	27.953	123.097		0.711231
mRFPwGBDeGFP2xrGBDProteinFlagGDIa20.25017						109.117	42.951	144.321	28.557	66.166	115.764		0.31647
mRFPwGBDeGFP2xrGBDProteinFlagGDIa20.25018						131.351	46.9	150.748	27.877	84.451	122.871		0.127577
mRFPwGBDeGFP2xrGBDProteinFlagGDIa20.25019						76.772	41.289	109.15	42.326	35.483	66.824		0.633442
mRFPwGBDeGFP2xrGBDProteinFlagGDIa20.25020						94.715	50.601	97.415	38.728	44.114	58.687		0.544279
										47.1362	97.3365
										23.5503	28.5668
mRFPwGBDeGFP2xrGBDProteinFlagGDIa20.0675011						104.912	53.595	155.354	38.419	51.317	116.935		0.469868
mRFPwGBDeGFP2xrGBDProteinFlagGDIa20.0675012						113.469	44.936	212.625	39.277	68.533	173.348		0.292018
mRFPwGBDeGFP2xrGBDProteinFlagGDIa20.0675013						147.264	54.715	170.688	48.157	92.549	122.531		0.0439202
mRFPwGBDeGFP2xrGBDProteinFlagGDIa20.0675014						128.178	45.565	216.244	51.68	82.613	164.564		0.146564
mRFPwGBDeGFP2xrGBDProteinFlagGDIa20.0675015						74.75	43.673	160.404	37.622	31.077	122.782		0.678958
mRFPwGBDeGFP2xrGBDProteinFlagGDIa20.0675016						116.969	59.133	149.709	39.403	57.836	110.306		0.402524
										63.9875	135.078
										22.2028	26.7786
Summary:
	Cdc42	Rho	% Change		T-test
Ctrl	96.8005	136.911
0.5	18.4708	73.6666	0.809187	0.461939	5.59174e-05	0.121097
0.25	19.822	84.205	0.795228	0.384967	6.04588e-05	0.0674555
0.125	47.1362	97.3365	0.513059	0.289054	0.00339095	0.0296416
0.0675	63.9875	135.078	0.338976	0.0133931	0.0260848	0.905376

## Sheet: 02.16.17
						Cdc42 R	Cdc42 BG	Rho R	Rho BG	Cdc42 R-BG	Rho R-BG
mRFPwGBDeGFP2xrGBDctrl001						97.96	40.176	92.12	23.282	57.784	68.838
mRFPwGBDeGFP2xrGBDctrl002						92.551	36.33	94.727	26.758	56.221	67.969
mRFPwGBDeGFP2xrGBDctrl040						141.702	44.563	122.261	37.081	97.139	85.18
mRFPwGBDeGFP2xrGBDctrl041						135.173	47.527	100.423	26.278	87.646	74.145
mRFPwGBDeGFP2xrGBDctrl042						131.108	55.081	146.448	31.711	76.027	114.737
mRFPwGBDeGFP2xrGBDctrl043						191.372	53.754	134.022	35.375	137.618	98.647
										85.4058	84.9193
										30.2373	18.6527
mRFPwGBDeGFP2xrGBDProteinFlagGDIa20.5007						89.973	69.06	49.038	35.379	20.913	13.659		0.755134
mRFPwGBDeGFP2xrGBDProteinFlagGDIa20.5008						120.181	62.886	62.155	30.978	57.295	31.177		0.329144
mRFPwGBDeGFP2xrGBDProteinFlagGDIa20.5020						124.065	61.226	120.375	27.236	62.839	93.139		0.264231
mRFPwGBDeGFP2xrGBDProteinFlagGDIa20.5021						82.341	46.675	87.003	30.227	35.666	56.776		0.582394
mRFPwGBDeGFP2xrGBDProteinFlagGDIa20.5032						78.086	45.978	84.544	26.219	32.108	58.325		0.624054
mRFPwGBDeGFP2xrGBDProteinFlagGDIa20.5033						85.465	49.485	86.395	29.293	35.98	57.102		0.578717
										40.8002	51.6963
										15.9902	27.1453
mRFPwGBDeGFP2xrGBDProteinFlagGDIa20.25009						99.498	52.896	105.408	29.404	46.602	76.004		0.454346
mRFPwGBDeGFP2xrGBDProteinFlagGDIa20.25010						74.512	35.312	86.455	25.184	39.2	61.271		0.541015
mRFPwGBDeGFP2xrGBDProteinFlagGDIa20.25018						58.567	43.369	104.743	30.207	15.198	74.536		0.82205
mRFPwGBDeGFP2xrGBDProteinFlagGDIa20.25019						98.164	49.588	88.243	30.208	48.576	58.035		0.431233
mRFPwGBDeGFP2xrGBDProteinFlagGDIa20.25034						123.257	48.938	69.784	22.552	74.319	47.232		0.129814
mRFPwGBDeGFP2xrGBDProteinFlagGDIa20.25035						132.582	50.255	101.672	24.757	82.327	76.915		0.0360495
										51.037	65.6655
										24.3778	12.0785
mRFPwGBDeGFP2xrGBDProteinFlagGDIa20.125011						124.739	45.132	88.265	25.286	79.607	62.979		0.0678974
mRFPwGBDeGFP2xrGBDProteinFlagGDIa20.125012						130.451	51.491	115.645	34.169	78.96	81.476		0.075473
mRFPwGBDeGFP2xrGBDProteinFlagGDIa20.125016						146.978	55.4	159.191	33.571	91.578	125.62		-0.0722687
mRFPwGBDeGFP2xrGBDProteinFlagGDIa20.125017						150.743	49.903	121.738	27.522	100.84	94.216		-0.180716
mRFPwGBDeGFP2xrGBDProteinFlagGDIa20.125026						144.752	53.915	124.109	29.44	90.837	94.669		-0.0635925
mRFPwGBDeGFP2xrGBDProteinFlagGDIa20.125027						79.275	45.897	108.865	30.294	33.378	78.571		0.609184
										79.2	89.5885
										23.9032	21.1696
mRFPwGBDeGFP2xrGBDProteinFlagGDIa20.0675014						105.067	46.951	127.546	31.65	58.116	95.896		0.319531
mRFPwGBDeGFP2xrGBDProteinFlagGDIa20.0675015						108.089	41.329	114.972	28.47	66.76	86.502		0.21832
mRFPwGBDeGFP2xrGBDProteinFlagGDIa20.0675036						162.078	61.267	99.863	20.815	100.811	79.048		-0.180376
mRFPwGBDeGFP2xrGBDProteinFlagGDIa20.0675037						121.88	48.863	105.329	25.514	73.017	79.815		0.145058
mRFPwGBDeGFP2xrGBDProteinFlagGDIa20.0675038						120.234	41.024	142.735	26.426	79.21	116.309		0.0725458
mRFPwGBDeGFP2xrGBDProteinFlagGDIa20.0675039						158.249	49.057	141.805	26.848	109.192	114.957		-0.278508
										81.1843	95.4212
										19.902	16.789
mRFPwGBDeGFP2xrGBDProteinFlagGDIa21x005						70.403	47.232	59.304	30.505	23.171	28.799		0.728695
mRFPwGBDeGFP2xrGBDProteinFlagGDIa21x006						49.176	43.802	61.263	25.885	5.374	35.378		0.937077
mRFPwGBDeGFP2xrGBDProteinFlagGDIa21x022						40.195	37.892	50.409	26.385	2.303	24.024		0.973035
mRFPwGBDeGFP2xrGBDProteinFlagGDIa21x023						51.011	44.374	32.565	25.258	6.637	7.307		0.922289
mRFPwGBDeGFP2xrGBDProteinFlagGDIa21x030						50.45	43.783	34.715	29.038	6.667	5.677		0.921937
mRFPwGBDeGFP2xrGBDProteinFlagGDIa21x031						53.349	51.287	47.86	30.791	2.062	17.069		0.975856
										7.70233	19.709
										7.84696	11.8696
mRFPwGBDeGFP2xrGBDProteinFlagGDIa22x003						52.016	50.818	26.912	25.818	1.198	1.094		0.985973
mRFPwGBDeGFP2xrGBDProteinFlagGDIa22x004						45.507	40.459	32.342	29.61	5.048	2.732		0.940894
mRFPwGBDeGFP2xrGBDProteinFlagGDIa22x024						49.225	45.116	26.081	23.945	4.109	2.136		0.951889
mRFPwGBDeGFP2xrGBDProteinFlagGDIa22x025						55.823	46.743	39.376	31.601	9.08	7.775		0.893684
mRFPwGBDeGFP2xrGBDProteinFlagGDIa22x028						33.499	32.594	20.871	18.083	0.905	2.788		0.989404
mRFPwGBDeGFP2xrGBDProteinFlagGDIa22x029						45.683	43.701	26.373	25.628	1.982	0.745		0.976793
										3.72033	2.87833
Summary:										3.09677	2.54137
	Cdc42	Rho	% Change		T-test
Ctrl	85.4058	84.9193
2	3.72033	2.87833	0.956439	0.966105	0.00112137	0.000100275
1	7.70233	19.709	0.909815	0.767909	0.00109641	6.72654e-05
0.5	40.8002	51.6963	0.522279	0.39123	0.0136231	0.0359131
0.25	51.037	65.6655	0.402418	0.226731	0.0565956	0.064331
0.125	79.2	89.5885	0.0726629	-0.0549836	0.702012	0.693884
0.0675	81.1843	95.4212	0.0494287	-0.123668	0.781866	0.329759

## Sheet: 06.08.17
Standard Curve of Peter's RhoGDI protein
					Cdc42 R	Cdc42 BG	Rho R	Rho BG	Cdc42 R-BG	Rho R-BG
mRFPwGBDeGFP2xrGBD001					71.026	44.882	89.242	33.268	26.144	55.974
mRFPwGBDeGFP2xrGBD002					75.429	39.669	80.564	24.289	35.76	56.275
mRFPwGBDeGFP2xrGBD003					87.078	38.112	40.351	15.83	48.966	24.521
mRFPwGBDeGFP2xrGBD004					86.528	34.791	50.913	17.481	51.737	33.432
mRFPwGBDeGFP2xrGBD005					87.088	43.749	67.28	27.678	43.339	39.602
mRFPwGBDeGFP2xrGBD006					89.114	33.238	83.064	28.63	55.876	54.434
									43.637	44.0397
									11.0629	13.5157
mRFPwGBDeGFP2xrGBDPeter'sRhoGDI0.5028					26.466	25.37	24.125	19.471	1.096	4.654
mRFPwGBDeGFP2xrGBDPeter'sRhoGDI0.5029					39.175	34.51	34.157	21.755	4.665	12.402
									2.8805	8.528
mRFPwGBDeGFP2xrGBDPeter'sRhoGDI0.25017
mRFPwGBDeGFP2xrGBDPeter'sRhoGDI0.25018
mRFPwGBDeGFP2xrGBDPeter'sRhoGDI0.25019
mRFPwGBDeGFP2xrGBDPeter'sRhoGDI0.25020
mRFPwGBDeGFP2xrGBDPeter'sRhoGDI0.25021
mRFPwGBDeGFP2xrGBDPeter'sRhoGDI0.25022
mRFPwGBDeGFP2xrGBDPeter'sRhoGDI0.25023
mRFPwGBDeGFP2xrGBDPeter'sRhoGDI0.125013					50.44	34.115	82.814	24.765	16.325	58.049
mRFPwGBDeGFP2xrGBDPeter'sRhoGDI0.125014					55.261	35.629	75.316	21.358	19.632	53.958
mRFPwGBDeGFP2xrGBDPeter'sRhoGDI0.125015					56.577	49.03	26.514	20.355	7.547	6.159
mRFPwGBDeGFP2xrGBDPeter'sRhoGDI0.125016					45.047	41.879	24.219	17.302	3.168	6.917
mRFPwGBDeGFP2xrGBDPeter'sRhoGDI0.125023					42.527	40.296	30.718	29.851	2.231	0.867
mRFPwGBDeGFP2xrGBDPeter'sRhoGDI0.125024					37.165	36.257	37.324	24.873	0.908	12.451
mRFPwGBDeGFP2xrGBDPeter'sRhoGDI0.125025					48.832	47.198	54.249	28.284	1.634	25.965
mRFPwGBDeGFP2xrGBDPeter'sRhoGDI0.125026
mRFPwGBDeGFP2xrGBDPeter'sRhoGDI0.125027					95.174	42.053	54.512	27.7	53.121	26.812
									13.0708	23.8973
									17.6573	21.867
mRFPwGBDeGFP2xrGBDPeter'sRhoGDI0.0625007					47.215	42.423	69.111	25.03	4.792	44.081
mRFPwGBDeGFP2xrGBDPeter'sRhoGDI0.0625008					53.13	45.127	55	19.659	8.003	35.341
mRFPwGBDeGFP2xrGBDPeter'sRhoGDI0.0625009					67.649	39.368	67.355	22.611	28.281	44.744
mRFPwGBDeGFP2xrGBDPeter'sRhoGDI0.0625010					81.82	43.851	80.941	23.172	37.969	57.769
mRFPwGBDeGFP2xrGBDPeter'sRhoGDI0.0625011					33.838	23.606	41.357	17.506	10.232	23.851
mRFPwGBDeGFP2xrGBDPeter'sRhoGDI0.0625012					60.36	30.001	56.649	22.275	30.359	34.374
									19.9393	40.0267
									13.9239	11.5676
	Cdc42	Rho	% C Chg	% R Chg	C T-test	R T-test
ctrl	43.637	44.0397
0.5	2.8805	8.528	0.93399	0.806356
0.125	13.0708	23.8973	0.700466	0.45737
0.0625	19.9393	40.0267	0.543064	0.0911224

## Sheet: 06.15.17
Standard Curve of Peter's RhoGDI protein
					Cdc42 R	Cdc42 BG	Rho R	Rho BG	Cdc42 R-BG	Rho R-BG
mRFPwGBDeGFP2xrGBD001					82.742	48.029	60.662	27.656	34.713	33.006
mRFPwGBDeGFP2xrGBD002					81.222	41.174	79.135	26.542	40.048	52.593
mRFPwGBDeGFP2xrGBD003					87.205	42.939	104.023	25.654	44.266	78.369
mRFPwGBDeGFP2xrGBD004					83.034	39.294	98.085	27.038	43.74	71.047
mRFPwGBDeGFP2xrGBD011					63.165	34.481	71.455	21.646	28.684	49.809
mRFPwGBDeGFP2xrGBD012					61.142	27.837	70.154	25.591	33.305	44.563
									37.4593	54.8978
									6.23355	16.9054
mRFPwGBDeGFP2xrGBDPeter'sproteinRhoGDIa0.03019					83.581	45.79	61.984	24.273	37.791	37.711
mRFPwGBDeGFP2xrGBDPeter'sproteinRhoGDIa0.03020					80.791	39.693	60.932	22.149	41.098	38.783
mRFPwGBDeGFP2xrGBDPeter'sproteinRhoGDIa0.03021					67.517	37.861	79.492	27.553	29.656	51.939
mRFPwGBDeGFP2xrGBDPeter'sproteinRhoGDIa0.03022					71.096	40.603	72.218	29.34	30.493	42.878
mRFPwGBDeGFP2xrGBDPeter'sproteinRhoGDIa0.03023					73.512	44.041	75.285	26.987	29.471	48.298
mRFPwGBDeGFP2xrGBDPeter'sproteinRhoGDIa0.03024					89.412	45.3	100.059	29.438	44.112	70.621
									35.4368	48.3717
									6.4234	12.1946
mRFPwGBDeGFP2xrGBDPeter'sproteinRhoGDIa0.06025					43.524	39.151	29.692	20.173	4.373	9.519
mRFPwGBDeGFP2xrGBDPeter'sproteinRhoGDIa0.06026					51.155	38.535	32.269	20.392	12.62	11.877
mRFPwGBDeGFP2xrGBDPeter'sproteinRhoGDIa0.06027					101.75	47.707	74.998	24.061	54.043	50.937
mRFPwGBDeGFP2xrGBDPeter'sproteinRhoGDIa0.06028					97.88	46.065	81.432	24.72	51.815	56.712
mRFPwGBDeGFP2xrGBDPeter'sproteinRhoGDIa0.06029					94.243	45.901	57.365	21.798	48.342	35.567
mRFPwGBDeGFP2xrGBDPeter'sproteinRhoGDIa0.06030					87.019	41.286	99.274	25.317	45.733	73.957
									36.1543	39.7615
									21.7691	25.6565
mRFPwGBDeGFP2xrGBDPeter'sproteinRhoGDIa0.015013					80.619	36.696	45.261	20.218	43.923	25.043
mRFPwGBDeGFP2xrGBDPeter'sproteinRhoGDIa0.015014					115.33	48.694	69.665	19.944	66.636	49.721
mRFPwGBDeGFP2xrGBDPeter'sproteinRhoGDIa0.015015					108.522	48.129	111.371	35.557	60.393	75.814
mRFPwGBDeGFP2xrGBDPeter'sproteinRhoGDIa0.015016					108.665	48.61	103.889	34.078	60.055	69.811
mRFPwGBDeGFP2xrGBDPeter'sproteinRhoGDIa0.015017					78.698	47.361	96.83	26.954	31.337	69.876
mRFPwGBDeGFP2xrGBDPeter'sproteinRhoGDIa0.015018					105.327	43.874	84.087	24.802	61.453	59.285
									53.9662	58.2583
									13.4752	18.7288
mRFPwGBDeGFP2xrGBDPeter'sproteinRhoGDIa0.25031					44.874	43.621	24.533	19.347	1.253	5.186
mRFPwGBDeGFP2xrGBDPeter'sproteinRhoGDIa0.25032					42.027	40.566	19.24	18.844	1.461	0.396
mRFPwGBDeGFP2xrGBDPeter'sproteinRhoGDIa0.25007					24.772	22.11	18.752	17.862	2.662	0.89
mRFPwGBDeGFP2xrGBDPeter'sproteinRhoGDIa0.25008					44.021	37.648	20.964	20.194	6.373	0.77
mRFPwGBDeGFP2xrGBDPeter'sproteinRhoGDIa0.25009					46.86	44.508	20.623	19.954	2.352	0.669
mRFPwGBDeGFP2xrGBDPeter'sproteinRhoGDIa0.25010					46.233	40.626	22.217	21.733	5.607	0.484
									3.28467	1.39917
									2.17449	1.86399
mRFPwGBDeGFP2xrGBDPeter'sproteinRhoGDIa0.0125033					38.145	34.001	22.972	16.763	4.144	6.209
mRFPwGBDeGFP2xrGBDPeter'sproteinRhoGDIa0.0125034					52.534	38.602	24.63	17.933	13.932	6.697
mRFPwGBDeGFP2xrGBDPeter'sproteinRhoGDIa0.0125035					65.648	40.789	29.223	21.069	24.859	8.154
mRFPwGBDeGFP2xrGBDPeter'sproteinRhoGDIa0.0125036					56.085	45.79	32.909	21.731	10.295	11.178
mRFPwGBDeGFP2xrGBDPeter'sproteinRhoGDIa0.0125037					45.203	20.615	56.085	41.203	24.588	14.882
									15.5636	9.424
									9.06465	3.61427
	Cdc42	Rho	% Ch C	% Ch R	T-test C	T-test R
ctrl	37.4593	54.8978
0.015	53.9662	58.2583	-0.44066	-0.0612137
0.03	35.4368	48.3717	0.0539919	0.118878
0.06	36.1543	39.7615	0.0348378	0.275718
0.125	15.5636	9.424	0.58452	0.828336
0.25	3.28467	1.39917	0.912314	0.974513

## Sheet: 06.22.17
Standard Curve of Peter's RhoGDI protein
					Cdc42 R	Cdc42 BG	Rho R	Rho BG	Cdc42 R-BG	Rho R-BG
mRFPwGBDeGFP2xrGBD001					65.927	3.423	62.52	40.075	62.504	22.445
mRFPwGBDeGFP2xrGBD002					123.739	42.637	132.363	36.482	81.102	95.881
mRFPwGBDeGFP2xrGBD003					58.293	27.421	59.423	20.664	30.872	38.759
mRFPwGBDeGFP2xrGBD004					68.337	24.465	55.391	21.209	43.872	34.182
mRFPwGBDeGFP2xrGBD005					83.93	27.628	103.919	27.93	56.302	75.989
mRFPwGBDeGFP2xrGBD006					81.997	31.665	88.358	27.233	50.332	61.125
									54.164	54.7302
									17.105	27.9495
mRFPwGBDeGFP2xrGBDPeter'sproteinRhoGDIa0.03027					54.858	22.494	33.935	13.398	32.364	20.537
mRFPwGBDeGFP2xrGBDPeter'sproteinRhoGDIa0.03028					63.452	29.33	29.394	14.174	34.122	15.22
mRFPwGBDeGFP2xrGBDPeter'sproteinRhoGDIa0.03029					51.994	24.71	47.95	18.703	27.284	29.247
mRFPwGBDeGFP2xrGBDPeter'sproteinRhoGDIa0.03030					42.351	22.607	37.004	16.1	19.744	20.904
mRFPwGBDeGFP2xrGBDPeter'sproteinRhoGDIa0.03031					59.798	29.229	37.948	17.56	30.569	20.388
mRFPwGBDeGFP2xrGBDPeter'sproteinRhoGDIa0.03032					46.551	19.595	32.148	14.16	26.956	17.988
									28.5065	20.714
									5.12539	4.70321
mRFPwGBDeGFP2xrGBDPeter'sproteinRhoGDIa0.06022					96.372	30.126	59.687	17.487	66.246	42.2
mRFPwGBDeGFP2xrGBDPeter'sproteinRhoGDIa0.06023					67.468	26.028	49.162	19.027	41.44	30.135
mRFPwGBDeGFP2xrGBDPeter'sproteinRhoGDIa0.06024					77.024	33.165	59.374	21.867	43.859	37.507
mRFPwGBDeGFP2xrGBDPeter'sproteinRhoGDIa0.06025					69.19	28.689	69.094	23.364	40.501	45.73
mRFPwGBDeGFP2xrGBDPeter'sproteinRhoGDIa0.06026					94.991	31.978	74.119	23.74	63.013	50.379
mRFPwGBDeGFP2xrGBDPeter'sproteinRhoGDIa0.06033					87.107	44.862	92.764	42.539	42.245	50.225
mRFPwGBDeGFP2xrGBDPeter'sproteinRhoGDIa0.06034					82.208	39.751	95.738	44.842	42.457	50.896
									48.5373	43.8674
									11.0796	7.82628
mRFPwGBDeGFP2xrGBDPeter'sproteinRhoGDIa0.015007					63.521	24.018	48.506	17.866	39.503	30.64
mRFPwGBDeGFP2xrGBDPeter'sproteinRhoGDIa0.015008					66.258	23.948	43.689	15.442	42.31	28.247
mRFPwGBDeGFP2xrGBDPeter'sproteinRhoGDIa0.015009					71.768	28.768	62.16	20.422	43	41.738
mRFPwGBDeGFP2xrGBDPeter'sproteinRhoGDIa0.015010					57.597	21.86	60.842	18.945	35.737	41.897
mRFPwGBDeGFP2xrGBDPeter'sproteinRhoGDIa0.015011					43.149	25.65	42.513	20.861	17.499	21.652
mRFPwGBDeGFP2xrGBDPeter'sproteinRhoGDIa0.015012					28.879	15.687	53.457	20.329	13.192	33.128
									31.8735	32.8837
									13.1262	7.9042
mRFPwGBDeGFP2xrGBDPeter'sproteinRhoGDIa0.25013					37.82	29.724	20.791	13.958	8.096	6.833
mRFPwGBDeGFP2xrGBDPeter'sproteinRhoGDIa0.25014					24.359	21.884	23.066	18.968	2.475	4.098
mRFPwGBDeGFP2xrGBDPeter'sproteinRhoGDIa0.25015					27.13	25.935	20.967	19.164	1.195	1.803
mRFPwGBDeGFP2xrGBDPeter'sproteinRhoGDIa0.25016					30.373	26.651	23.484	17.744	3.722	5.74
mRFPwGBDeGFP2xrGBDPeter'sproteinRhoGDIa0.25017					26.684	25.255	16.485	11.981	1.429	4.504
mRFPwGBDeGFP2xrGBDPeter'sproteinRhoGDIa0.25018					28.528	22.982	24.245	14.515	5.546	9.73
									3.74383	5.45133
									2.67038	2.69587
mRFPwGBDeGFP2xrGBDPeter'sproteinRhoGDIa0.0125019					25.322	22.033	16.305	14.48	3.289	1.825
mRFPwGBDeGFP2xrGBDPeter'sproteinRhoGDIa0.0125020					52.137	29.669	29.422	12.449	22.468	16.973
mRFPwGBDeGFP2xrGBDPeter'sproteinRhoGDIa0.0125021					26.378	22.411	34.505	16.177	3.967	18.328
mRFPwGBDeGFP2xrGBDPeter'sproteinRhoGDIa0.0125035					24.558	20.436	20.185	14.177	4.122	6.008
mRFPwGBDeGFP2xrGBDPeter'sproteinRhoGDIa0.0125036					41.247	25.07	17.848	13.676	16.177	4.172
									10.0046	9.4612
									8.79761	7.63641
	Cdc42	Rho	% Ch C	% Ch R	T-test C	T-test R
ctrl	54.164	54.7302
0.015	31.8735	32.8837	0.411537	0.399167	0.0311667	0.116737
0.03	28.5065	20.714	0.4737	0.621525	0.0129094	0.0301909
0.06	48.5373	43.8674	0.103883	0.198478	0.508313	0.394265
0.125	10.0046	9.4612	0.815291	0.82713	0.000645514	0.00931559
0.25	3.74383	5.45133	0.93088	0.900396	0.000687669	0.00740931

## Sheet: 06.26.17
Standard Curve of Peter's RhoGDI protein
					Cdc42 R	Cdc42 BG	Rho R	Rho BG	Cdc42 R-BG	Rho R-BG
mRFPwGBDeGFP2xrGBD001					64.538	28.531	59.104	31.019	36.007	28.085
mRFPwGBDeGFP2xrGBD002					81.279	34.441	56.982	18.27	46.838	38.712
mRFPwGBDeGFP2xrGBD003					138.911	37.91	89.083	34.854	101.001	54.229
mRFPwGBDeGFP2xrGBD004					132.733	44.848	100.019	33.498	87.885	66.521
mRFPwGBDeGFP2xrGBD005					87.583	37.017	108.053	27.307	50.566	80.746
mRFPwGBDeGFP2xrGBD006					80.714	32.656	124.665	28.971	48.058	95.694
									61.7258	60.6645
									26.1584	25.4927
mRFPwGBDeGFP2xrGBDPeter'sproteinRhoGDIa0.03013					69.469	39.919	84.241	25.082	29.55	59.159
mRFPwGBDeGFP2xrGBDPeter'sproteinRhoGDIa0.03014					53.948	31.409	94.661	25.386	22.539	69.275
mRFPwGBDeGFP2xrGBDPeter'sproteinRhoGDIa0.03015					81.134	34.982	99.191	21.98	46.152	77.211
mRFPwGBDeGFP2xrGBDPeter'sproteinRhoGDIa0.03016					74.999	32.575	101.879	21.688	42.424	80.191
mRFPwGBDeGFP2xrGBDPeter'sproteinRhoGDIa0.03017					47.167	24.869	69.981	22.223	22.298	47.758
mRFPwGBDeGFP2xrGBDPeter'sproteinRhoGDIa0.03018					48.363	21.159	89.451	24.228	27.204	65.223
									31.6945	66.4695
									10.2081	11.972
mRFPwGBDeGFP2xrGBDPeter'sproteinRhoGDIa0.06019					38.291	28.49	41.937	18.371	9.801	23.566
mRFPwGBDeGFP2xrGBDPeter'sproteinRhoGDIa0.06020					37.056	26.931	43.359	20.655	10.125	22.704
mRFPwGBDeGFP2xrGBDPeter'sproteinRhoGDIa0.06021					76.883	34.73	67.528	20.033	42.153	47.495
mRFPwGBDeGFP2xrGBDPeter'sproteinRhoGDIa0.06022					72.165	31.423	62.688	20.126	40.742	42.562
mRFPwGBDeGFP2xrGBDPeter'sproteinRhoGDIa0.06023					67.431	37.608	39.348	26.368	29.823	12.98
mRFPwGBDeGFP2xrGBDPeter'sproteinRhoGDIa0.06024					57.89	36.489	29.361	19.986	21.401	9.375
									25.6742	26.447
									14.3374	15.478
mRFPwGBDeGFP2xrGBDPeter'sproteinRhoGDIa0.015007					87.421	26.322	82.538	30.076	61.099	52.462
mRFPwGBDeGFP2xrGBDPeter'sproteinRhoGDIa0.015008					80.511	32.919	107.725	25.817	47.592	81.908
mRFPwGBDeGFP2xrGBDPeter'sproteinRhoGDIa0.015009					74.034	32.749	58.894	19.166	41.285	39.728
mRFPwGBDeGFP2xrGBDPeter'sproteinRhoGDIa0.015010					81.507	31.333	61.562	20.173	50.174	41.389
mRFPwGBDeGFP2xrGBDPeter'sproteinRhoGDIa0.015011					110.552	34.353	64.658	24.311	76.199	40.347
mRFPwGBDeGFP2xrGBDPeter'sproteinRhoGDIa0.015012					96.97	40.803	79.03	25.75	56.167	53.28
									55.4193	51.519
									12.2733	16.0869
mRFPwGBDeGFP2xrGBDPeter'sproteinRhoGDIa0.25031					23.867	21.212	29.072	23.444	2.655	5.628
mRFPwGBDeGFP2xrGBDPeter'sproteinRhoGDIa0.25032					28.963	28.686	33.927	24	0.277	9.927
mRFPwGBDeGFP2xrGBDPeter'sproteinRhoGDIa0.25033					40.484	38.37	29.739	28.797	2.114	0.942
mRFPwGBDeGFP2xrGBDPeter'sproteinRhoGDIa0.25034					36.041	33.154	28.383	22.296	2.887	6.087
mRFPwGBDeGFP2xrGBDPeter'sproteinRhoGDIa0.25035					24.78	19.452	33.984	19.597	5.328	14.387
mRFPwGBDeGFP2xrGBDPeter'sproteinRhoGDIa0.25036					38.23	35.025	36.969	23.048	3.205	13.921
									2.74433	8.482
									1.63713	5.23971
mRFPwGBDeGFP2xrGBDPeter'sproteinRhoGDIa0.0125025					35.477	33.156	34.136	23.889	2.321	10.247
mRFPwGBDeGFP2xrGBDPeter'sproteinRhoGDIa0.0125026					43.089	34.1	35.849	22.714	8.989	13.135
mRFPwGBDeGFP2xrGBDPeter'sproteinRhoGDIa0.0125027					48.344	29.478	26.309	21.926	18.866	4.383
mRFPwGBDeGFP2xrGBDPeter'sproteinRhoGDIa0.0125028					40.881	37.381	32.553	22.175	3.5	10.378
mRFPwGBDeGFP2xrGBDPeter'sproteinRhoGDIa0.0125029					54.446	46.126	34.936	24.906	8.32	10.03
mRFPwGBDeGFP2xrGBDPeter'sproteinRhoGDIa0.0125030					61.104	46.535	32.75	28.017	14.569	4.733
									9.4275	8.81767
									6.36517	3.49106
	Cdc42	Rho	% Ch C	% Ch R	T-test C	T-test R
ctrl	61.7258	60.6645
0.015	55.4193	51.519	0.10217	0.150755	0.609237	0.477567
0.03	31.6945	66.4695	0.486528	-0.0956902	0.0368497	0.62893
0.06	25.6742	26.447	0.584061	0.564045	0.0187743	0.0221604
0.125	9.4275	8.81767	0.847268	0.854649	0.00378136	0.00392269
0.25	2.74433	8.482	0.95554	0.860182	0.00262363	0.0035519

## Sheet: 06.29.17
Standard Curve of Peter's RhoGDI protein
					Cdc42 R	Cdc42 BG	Rho R	Rho BG	Cdc42 R-BG	Rho R-BG
mRFPwGBDeGFP2xrGBD001					111.005	37.213	112.711	26.818	73.792	85.893
mRFPwGBDeGFP2xrGBD002					89.878	31.673	99.346	20.912	58.205	78.434
mRFPwGBDeGFP2xrGBD003					82.302	33.142	77.857	22.481	49.16	55.376
mRFPwGBDeGFP2xrGBD004					103.032	41.36	69.803	20.948	61.672	48.855
mRFPwGBDeGFP2xrGBD005					88.946	38.824	46.028	18.62	50.122	27.408
mRFPwGBDeGFP2xrGBD006					69.945	35.29	61.132	22.4	34.655	38.732
									54.601	55.783
									13.2574	22.6439
mRFPwGBDeGFP2xrGBDPeter'sproteinRhoGDIa0.03013					66.935	27.502	114.985	32.916	39.433	82.069
mRFPwGBDeGFP2xrGBDPeter'sproteinRhoGDIa0.03014					125.274	45.401	86.442	24.221	79.873	62.221
mRFPwGBDeGFP2xrGBDPeter'sproteinRhoGDIa0.03015					63.832	28.435	51.336	16.56	35.397	34.776
mRFPwGBDeGFP2xrGBDPeter'sproteinRhoGDIa0.03016					101.278	40.159	59.593	19.169	61.119	40.424
mRFPwGBDeGFP2xrGBDPeter'sproteinRhoGDIa0.03017					64.74	31.23	65.299	21.749	33.51	43.55
mRFPwGBDeGFP2xrGBDPeter'sproteinRhoGDIa0.03018					53.817	26.825	83.197	25.716	26.992	57.481
									46.054	53.4202
									20.2425	17.485
mRFPwGBDeGFP2xrGBDPeter'sproteinRhoGDIa0.06019					83.373	43.417	106.014	25.779	39.956	80.235
mRFPwGBDeGFP2xrGBDPeter'sproteinRhoGDIa0.06020					90.686	50.635	117.785	32.307	40.051	85.478
mRFPwGBDeGFP2xrGBDPeter'sproteinRhoGDIa0.06021					37.725	28.464	36.745	21.896	9.261	14.849
mRFPwGBDeGFP2xrGBDPeter'sproteinRhoGDIa0.06022					43.894	39.261	38.426	20.932	4.633	17.494
mRFPwGBDeGFP2xrGBDPeter'sproteinRhoGDIa0.06023					89.41	46.508	107.268	27.46	42.902	79.808
mRFPwGBDeGFP2xrGBDPeter'sproteinRhoGDIa0.06024					108.658	48.097	94.922	26.328	60.561	68.594
									32.894	57.743
									21.5589	32.6791
mRFPwGBDeGFP2xrGBDPeter'sproteinRhoGDIa0.015007					65.104	33.896	63.61	18.302	31.208	45.308
mRFPwGBDeGFP2xrGBDPeter'sproteinRhoGDIa0.015008					79.028	34.177	74.765	23.423	44.851	51.342
mRFPwGBDeGFP2xrGBDPeter'sproteinRhoGDIa0.015009					77.819	39.63	41.316	19.222	38.189	22.094
mRFPwGBDeGFP2xrGBDPeter'sproteinRhoGDIa0.015010					82.559	40.714	83.181	32.192	41.845	50.989
mRFPwGBDeGFP2xrGBDPeter'sproteinRhoGDIa0.015011					87.167	44.681	59.677	23.687	42.486	35.99
mRFPwGBDeGFP2xrGBDPeter'sproteinRhoGDIa0.015012					111.108	43.691	68.092	22.266	67.417	45.826
									44.3327	41.9248
									12.2699	11.1892
mRFPwGBDeGFP2xrGBDPeter'sproteinRhoGDIa0.25031					41.735	38.791	23.568	17.349	2.944	6.219
mRFPwGBDeGFP2xrGBDPeter'sproteinRhoGDIa0.25032					36.89	36.281	20.377	13.37	0.609	7.007
mRFPwGBDeGFP2xrGBDPeter'sproteinRhoGDIa0.25033					39.055	31.649	26.91	18.763	7.406	8.147
mRFPwGBDeGFP2xrGBDPeter'sproteinRhoGDIa0.25034					39.979	33.83	32.048	17.469	6.149	14.579
mRFPwGBDeGFP2xrGBDPeter'sproteinRhoGDIa0.25035					37.641	32.089	19.539	19.047	5.552	0.492
mRFPwGBDeGFP2xrGBDPeter'sproteinRhoGDIa0.25036					36.697	33	26.356	20.626	3.697	5.73
									4.39283	7.029
									2.46608	4.54596
mRFPwGBDeGFP2xrGBDPeter'sproteinRhoGDIa0.125025					38.818	36.911	36.012	23.858	1.907	12.154
mRFPwGBDeGFP2xrGBDPeter'sproteinRhoGDIa0.125026					55.065	40.029	34.69	21.935	15.036	12.755
mRFPwGBDeGFP2xrGBDPeter'sproteinRhoGDIa0.125027					37.556	31.012	26.12	13.401	6.544	12.719
mRFPwGBDeGFP2xrGBDPeter'sproteinRhoGDIa0.125028					34.739	32.901	33.695	21.051	1.838	12.644
mRFPwGBDeGFP2xrGBDPeter'sproteinRhoGDIa0.125029					32.099	25.098	16.866	14.483	7.001	2.383
mRFPwGBDeGFP2xrGBDPeter'sproteinRhoGDIa0.125030					26.82	22.462	25.078	19.156	4.358	5.922
									6.114	9.76283
									4.89163	4.49277
	Cdc42	Rho	% Ch C	% Ch R	T-test C	T-test R
ctrl	54.601	55.783
0.015	44.3327	41.9248	0.188061	0.24843	0.194165	0.219203
0.03	46.054	53.4202	0.156536	0.0423576	0.410351	0.84399
0.06	32.894	57.743	0.397557	-0.0351362	0.0675656	0.906565
0.125	6.114	9.76283	0.888024	0.824986	0.000115336	0.00369973
0.25	4.39283	7.029	0.919547	0.873994	0.000185871	0.0028339

[truncated: 1 more sheets: Summary]
