# Supplementary material for: Extraction of active RhoGTPases by RhoGDI regulates spatiotemporal patterning of RhoGTPases
Source: eLife. 2019 Oct 24;8:e50471. doi: 10.7554/eLife.50471 (PMC6910828; doi:10.7554/eLife.50471)
Supplement: Figure 6—source data 1. [file elife-50471-fig6-data1.xlsx]

## Sheet: Figure6B
Unprenylated	Prenylated
594.68	7402.64
569.248	5927.43
584.173	9412.82
568.728	4772.43

## Sheet: Figure6C
Time	Control	RhoGDI	RabGGTase Beta
0	1	1	1
0.15	0.994457	0.97453	0.995166
0.3	0.994948	0.943057	0.989379
0.45	0.991775	0.915914	0.986232
0.601	0.988453	0.881628	0.979403
0.751	0.984288	0.849307	0.974247
0.901	0.983441	0.817688	0.967888
1.051	0.978898	0.781884	0.964368
1.201	0.977058	0.747394	0.95942
1.351	0.974723	0.711711	0.953153
1.502	0.969479	0.676693	0.95175
1.652	0.967648	0.64273	0.942228
1.802	0.963844	0.607675	0.93925
1.952	0.962068	0.573486	0.932458
2.102	0.959366	0.536764	0.928792
2.252	0.957062	0.503843	0.925643
2.402	0.955691	0.469184	0.918208
2.553	0.95511	0.437399	0.914245
2.703	0.949352	0.40442	0.906791
2.853	0.948225	0.374345	0.900627
3.003	0.945768	0.344891	0.896544
3.153	0.942783	0.317119	0.891182
3.303	0.939908	0.290441	0.887997
3.453	0.936734	0.265594	0.882786
3.604	0.934651	0.2425	0.877656
3.754	0.931114	0.221324	0.873332
3.904	0.928592	0.20128	0.867494
4.054	0.92871	0.183682	0.862967
4.204	0.923721	0.166509	0.857291
4.354	0.921357	0.152197	0.853341
4.505	0.916955	0.138308	0.845941
4.655	0.914001	0.126319	0.840491
4.805	0.912215	0.11629	0.837109
4.955	0.909996	0.106535	0.831549
5.105	0.908097	0.0989381	0.828745
5.255	0.903602	0.0919245	0.820945
5.405	0.900641	0.0862843	0.817232
5.556	0.895332	0.0814126	0.812886
5.706	0.89349	0.077128	0.807082
5.856	0.892749	0.0735259	0.80335
6.006	0.888372	0.0706841	0.796147
6.156	0.887274	0.0682691	0.793459
6.306	0.882687	0.0662506	0.786209
6.456	0.882348	0.064641	0.781662
6.607	0.879146	0.0627048	0.779369
6.757	0.876211	0.0614755	0.77297
6.907	0.87554	0.0601702	0.769247
7.057	0.87117	0.0589095	0.762866
7.207	0.868978	0.0580621	0.758635
7.357	0.866231	0.0569846	0.754992
7.508	0.865253	0.0564512	0.75054
7.658	0.864887	0.0553687	0.746649
7.808	0.860379	0.0547486	0.741258
7.958	0.861277	0.0541365	0.737114
8.108	0.85605	0.0532976	0.729865
8.258	0.853911	0.0528246	0.726501
8.408	0.852368	0.0521131	0.723464
8.559	0.847965	0.0514237	0.717888
8.709	0.846793	0.0510279	0.713786
8.859	0.84328	0.0510121	0.709143
9.009	0.841096	0.050173	0.705383
9.159	0.838165	0.0498345	0.699977
9.309	0.836676	0.0493576	0.69629
9.459	0.835214	0.0494537	0.692616
9.61	0.831187	0.0488355	0.687852
9.76	0.829429	0.0482155	0.684604
9.91	0.824044	0.0481594	0.680787
10.06	0.823332	0.0471347	0.675747
10.21	0.821975	0.0468828	0.670941
10.36	0.818023	0.0465786	0.663652
10.511	0.817421	0.0465641	0.661684
10.661	0.814	0.0464773	0.655173
10.811	0.810919	0.0460535	0.655145
10.961	0.809737	0.0456413	0.650357
11.111	0.805835	0.0455821	0.644573
11.261	0.805244	0.0452922	0.642788
11.411	0.800621	0.0447797	0.63734
11.562	0.799222	0.0446413	0.633289
11.712	0.794597	0.0443027	0.630852
11.862	0.793948	0.0442224	0.627563
12.012	0.79248	0.0440585	0.624861
12.162	0.788399	0.0440105	0.618859
12.312	0.787156	0.0438058	0.617791
12.462	0.783292	0.043193	0.613932
12.613	0.78154	0.0433991	0.611078
12.763	0.779494	0.0433507	0.607876
12.913	0.776509	0.0430964	0.603001
13.063	0.775456	0.0427123	0.599198
13.213	0.771209	0.0427086	0.594557
13.363	0.767723	0.0422377	0.592414
13.514	0.764976	0.0423336	0.588124
13.664	0.763991	0.041885	0.583931
13.814	0.762039	0.0419187	0.58048
13.964	0.757777	0.0420787	0.575749
14.114	0.758349	0.041195	0.573631
14.264	0.752797	0.041308	0.568386
14.414	0.753044	0.0415543	0.565774
14.565	0.749861	0.0413803	0.562696
14.715	0.746239	0.0415039	0.558674
14.865	0.745216	0.0413348	0.555918
15.015	0.742153	0.0410181	0.552567
15.165	0.741376	0.0407726	0.549226
15.315	0.736893	0.0408654	0.546039
15.465	0.735067	0.0405622	0.540789
15.616	0.733915	0.040585	0.539308
15.766	0.730231	0.0409777	0.534555
15.916	0.730986	0.040502	0.531373
16.066	0.726181	0.0402554	0.528339
16.216	0.724617	0.0403015	0.524227
16.366	0.722873	0.0404879	0.522357
16.517	0.719167	0.0400632	0.516875
16.667	0.717035	0.0398709	0.515309
16.817	0.713003	0.0400567	0.509406
16.967	0.712089	0.0394942	0.509333
17.117	0.709299	0.0397401	0.506535
17.267	0.707295	0.039779	0.501768
17.417	0.706946	0.0397691	0.500587
17.568	0.703609	0.0398539	0.496738
17.718	0.700019	0.0395983	0.493721
17.868	0.698475	0.0394349	0.491328
18.018	0.696957	0.0397107	0.489159
18.168	0.694193	0.0394952	0.486589
18.318	0.692617	0.0396038	0.483881
18.468	0.691314	0.0395611	0.481407
18.619	0.687155	0.0391319	0.477202
18.769	0.685691	0.0390948	0.473663
18.919	0.683101	0.0389847	0.471148
19.069	0.68031	0.0388967	0.468571
19.219	0.679639	0.0391076	0.465974
19.369	0.675242	0.0387376	0.463739
19.52	0.673878	0.0389874	0.461509
19.67	0.671733	0.0389898	0.459392
19.82	0.669329	0.0388558	0.454931
19.97	0.668852	0.0384524	0.454353
20.12	0.664893	0.038683	0.448645
20.27	0.663544	0.0387142	0.447743
20.42	0.659772	0.0388081	0.44491
20.571	0.659035	0.0384842	0.441842
20.721	0.656468	0.0385702	0.440789
20.871	0.655466	0.0385244	0.437259
21.021	0.654813	0.0385069	0.435638
21.171	0.649831	0.0380483	0.43262
21.321	0.650964	0.0383704	0.430772
21.471	0.647765	0.0384197	0.427995
21.622	0.647198	0.0383641	0.424596
21.772	0.645628	0.038371	0.423365
21.922	0.641021	0.0382288	0.421217
22.072	0.640443	0.0381806	0.419416
22.222	0.637076	0.0381318	0.416769
22.372	0.636903	0.0382645	0.414297
22.523	0.635015	0.0381087	0.411962
22.673	0.631964	0.0377954	0.408752
22.823	0.631345	0.0378941	0.405948
22.973	0.627801	0.0376472	0.403713
23.123	0.626243	0.0380426	0.402049
23.273	0.624965	0.038097	0.401031
23.423	0.623143	0.037887	0.397548
23.574	0.621746	0.0379248	0.395913
23.724	0.617806	0.0375505	0.392359
23.874	0.617207	0.0377266	0.390936
24.024	0.613855	0.0378636	0.389442
24.174	0.613223	0.037452	0.386691
24.324	0.611345	0.0379393	0.385382
24.474	0.608817	0.0375465	0.380903
24.625	0.607454	0.037721	0.380704
24.775	0.605315	0.0375177	0.377322
24.925	0.603341	0.0373412	0.375832
25.075	0.602264	0.0375969	0.374626
25.225	0.600945	0.0379141	0.371552
25.375	0.598666	0.0373294	0.370183
25.526	0.596972	0.0369397	0.367055
25.676	0.594797	0.037511	0.365315
25.826	0.592131	0.0373777	0.363685
25.976	0.590169	0.0376466	0.361213
26.126	0.590539	0.0373401	0.359375
26.276	0.586081	0.0377198	0.356533
26.426	0.587385	0.0375643	0.355283
26.577	0.583775	0.0372565	0.352805
26.727	0.582219	0.0373836	0.350692
26.877	0.580623	0.0374484	0.348539
27.027	0.578817	0.037211	0.346056
27.177	0.577769	0.0371165	0.345448
27.327	0.5735	0.0373516	0.343427
27.477	0.572578	0.0370756	0.341132
27.628	0.570745	0.0369592	0.339939
27.778	0.569059	0.0371765	0.337069
27.928	0.56889	0.0371436	0.336031
28.078	0.566092	0.0370561	0.332738
28.228	0.566733	0.0373665	0.332045
28.378	0.563301	0.0370365	0.330439
28.529	0.561478	0.0368246	0.328739
28.679	0.560704	0.0368997	0.327044
28.829	0.55823	0.03719	0.324571
28.979	0.55783	0.0366008	0.323143
29.129	0.554562	0.0370542	0.321643
29.279	0.553696	0.0372583	0.320062
29.429	0.553622	0.0372188	0.318561
29.58	0.550722	0.0370902	0.316597
29.73	0.549634	0.0367959	0.315812
29.88	0.546605	0.0366327	0.313322
30.03	0.544663	0.0370893	0.312001
30.18	0.542941	0.0367249	0.309783
30.33	0.541255	0.036889	0.307833
30.48	0.541532	0.036954	0.307853
30.631	0.538238	0.0370398	0.305825
30.781	0.536645	0.0367836	0.303887
30.931	0.534979	0.0370187	0.302521
31.081	0.533329	0.0369165	0.30182
31.231	0.532277	0.0371522	0.300119
31.381	0.529776	0.0366475	0.297773
31.532	0.530084	0.0365983	0.296926
31.682	0.527101	0.036479	0.294585
31.832	0.525597	0.0365324	0.293106
31.982	0.524476	0.0368484	0.291584
32.132	0.522556	0.0367388	0.289923
32.282	0.521377	0.0366736	0.289596
32.432	0.518206	0.0365458	0.287356
32.583	0.517322	0.0364506	0.286248
32.733	0.514147	0.0368634	0.284997
32.883	0.513377	0.0364687	0.283799
33.033	0.51196	0.0368597	0.283317
33.183	0.510365	0.0367428	0.280678
33.333	0.509598	0.0366832	0.279831
33.483	0.505943	0.0363467	0.278062
33.634	0.505928	0.0365796	0.276222
33.784	0.504201	0.0365356	0.274765
33.934	0.502629	0.0365423	0.27449
34.084	0.502176	0.0362763	0.273028
34.234	0.498486	0.0361754	0.271099
34.384	0.498997	0.0365464	0.270644
34.535	0.495441	0.0362018	0.269645
34.685	0.495342	0.03615	0.267548
34.835	0.493819	0.0362579	0.266811
34.985	0.4912	0.0363629	0.264519
35.135	0.490229	0.0365211	0.264717
35.285	0.488078	0.0360998	0.262041
35.435	0.487529	0.0362828	0.26075
35.586	0.485419	0.036601	0.260143
35.736	0.48358	0.0364386	0.258091
35.886	0.483546	0.0359694	0.257503
36.036	0.482106	0.0360979	0.255721
36.186	0.480533	0.0362618	0.254689
36.336	0.478465	0.0365178	0.252823
36.486	0.478447	0.0366207	0.25183
36.637	0.477474	0.0360185	0.251142
36.787	0.475577	0.0361615	0.249187
36.937	0.475545	0.0360136	0.249002
37.087	0.471383	0.0362841	0.247409
37.237	0.470414	0.0362048	0.246266
37.387	0.470491	0.0361589	0.245329
37.538	0.468594	0.0362204	0.24384
37.688	0.467527	0.0365018	0.243024
37.838	0.465337	0.0361445	0.241582
37.988	0.463196	0.0357527	0.240028
38.138	0.462209	0.0359943	0.239271
38.288	0.460669	0.0365962	0.237829
38.438	0.459824	0.0361723	0.237365
38.589	0.457541	0.036396	0.235659
38.739	0.457238	0.0359515	0.234937
38.889	0.455013	0.0361152	0.233842
39.039	0.454439	0.0359264	0.232914
39.189	0.453523	0.0360799	0.232384
39.339	0.451967	0.0360551	0.230355
39.489	0.450719	0.0360234	0.229982
39.64	0.448127	0.0356397	0.228313
39.79	0.446107	0.0361182	0.227613
39.94	0.446559	0.0360747	0.227044
40.09	0.444642	0.0358396	0.225477
40.24	0.444536	0.0361044	0.225044
40.39	0.4412	0.0357521	0.223343
40.541	0.441409	0.0360443	0.222544
40.691	0.438935	0.0358572	0.221625
40.841	0.437148	0.0359723	0.220175
40.991	0.4367	0.0358858	0.219544
41.141	0.435054	0.0357482	0.217493
41.291	0.434603	0.0357453	0.216739
41.441	0.431776	0.0356326	0.216065
41.592	0.431552	0.0354946	0.215643
41.742	0.430002	0.0356627	0.214812
41.892	0.429471	0.035885	0.213782
42.042	0.428343	0.0356816	0.213202
42.192	0.425503	0.0357796	0.211764
42.342	0.425428	0.0354057	0.211022
42.492	0.422351	0.0357681	0.210276
42.643	0.423015	0.0360038	0.209272
42.793	0.421768	0.0358424	0.20848
42.943	0.418845	0.0361784	0.207154
43.093	0.418817	0.0357708	0.206433
43.243	0.416637	0.0360163	0.205081
43.393	0.4157	0.0358695	0.205086
43.544	0.414207	0.035827	0.204472
43.694	0.412802	0.0358635	0.202909
43.844	0.41244	0.0359447	0.202358
43.994	0.410456	0.0354979	0.200842
44.144	0.409598	0.0357412	0.200566
44.294	0.405769	0.0355881	0.20012
44.444	0.406929	0.0355663	0.199126
44.595	0.406747	0.035387	0.19843
44.745	0.405438	0.0358159	0.196879
44.895	0.406206	0.0355665	0.196371
45.045	0.401133	0.0359881	0.19543
45.195	0.401615	0.0355185	0.194469
45.345	0.400678	0.0358033	0.19353
45.495	0.398138	0.0355956	0.193554
45.646	0.399523	0.03529	0.192525
45.796	0.39651	0.0357417	0.191263
45.946	0.396353	0.0356267	0.19024
46.096	0.394348	0.0357354	0.189933
46.246	0.392418	0.035562	0.188878
46.396	0.391855	0.0357059	0.18873
46.547	0.390656	0.0352957	0.187238
46.697	0.38916	0.035492	0.186751
46.847	0.387237	0.0358661	0.185538
46.997	0.385887	0.0356988	0.185014
47.147	0.386498	0.035261	0.184261
47.297	0.38597	0.0354231	0.183521
47.447	0.382976	0.0355215	0.182223
47.598	0.382027	0.0355354	0.181107
47.748	0.380697	0.0355995	0.180772
47.898	0.379888	0.0355983	0.179799
48.048	0.37892	0.0351476	0.179168
48.198	0.378574	0.0358398	0.178419
48.348	0.374081	0.0353266	0.176922
48.498	0.375572	0.0354786	0.176766
48.649	0.373077	0.0355954	0.176005
48.799	0.373203	0.0351895	0.175701
48.949	0.370691	0.0352921	0.175071
49.099	0.369992	0.0354088	0.174077
49.249	0.369344	0.0353855	0.173087
49.399	0.367067	0.0355769	0.172544
49.55	0.366827	0.0356575	0.171865
49.7	0.365476	0.0352686	0.171568
49.85	0.36481	0.0354209	0.16998
50	0.364792	0.0355077	0.169755
50.15	0.362319	0.0354236	0.168756
50.3	0.361684	0.0351862	0.168271
50.45	0.360197	0.0352262	0.167633
50.601	0.357961	0.0349735	0.166827
50.751	0.359064	0.0355995	0.166742
50.901	0.355881	0.0352248	0.165669
51.051	0.356345	0.0356531	0.164876
51.201	0.35443	0.0353984	0.164371
51.351	0.352882	0.0353196	0.163695
51.501	0.352919	0.0350031	0.162864
51.652	0.351222	0.0354431	0.162454
51.802	0.351378	0.0355249	0.161841
51.952	0.349075	0.0353349	0.161061
52.102	0.347648	0.0352603	0.160653
52.252	0.346295	0.0351921	0.160076
52.402	0.345204	0.0352299	0.159719
52.553	0.345317	0.0355039	0.15962
52.703	0.342487	0.035356	0.157694
52.853	0.342298	0.0356471	0.156694
53.003	0.340306	0.0356266	0.155855
53.153	0.339764	0.0353625	0.155518
53.303	0.338828	0.0353321	0.154465
53.453	0.337401	0.0350058	0.154163
53.604	0.337397	0.0353948	0.153415
53.754	0.334964	0.0355593	0.153135
53.904	0.335204	0.0352191	0.152723
54.054	0.333834	0.0354168	0.152461
54.204	0.332513	0.0351666	0.151501
54.354	0.331743	0.0352654	0.151283
54.504	0.331379	0.035428	0.150067
54.655	0.331593	0.0352036	0.150125
54.805	0.329725	0.0348575	0.149844
54.955	0.328409	0.0354243	0.148931
55.105	0.328151	0.0347298	0.148554
55.255	0.325719	0.0352167	0.147482
55.405	0.326296	0.0349949	0.147245
55.556	0.324196	0.0351798	0.146497
55.706	0.322993	0.0354599	0.146312
55.856	0.32212	0.034787	0.145484
56.006	0.321126	0.0352319	0.145194
56.156	0.321477	0.0349242	0.144287
56.306	0.319833	0.0352067	0.14334
56.456	0.318635	0.0351798	0.14306
56.607	0.316552	0.0352696	0.142718
56.757	0.316292	0.0354496	0.142398
56.907	0.315265	0.0349321	0.142011
57.057	0.313842	0.0352317	0.14132
57.207	0.313272	0.0348932	0.141506
57.357	0.310895	0.035219	0.140308
57.507	0.311012	0.0352504	0.139832
57.658	0.31102	0.0355503	0.139486
57.808	0.308869	0.0350632	0.138812
57.958	0.308871	0.0347996	0.138119
58.108	0.30717	0.0350985	0.137142
58.258	0.307266	0.0351152	0.136815
58.408	0.304943	0.0356973	0.136808
58.559	0.305325	0.0354126	0.136232
58.709	0.304672	0.0351032	0.136048
58.859	0.302975	0.035213	0.135031
59.009	0.302697	0.0347925	0.134757
59.159	0.300555	0.0351288	0.134287
59.309	0.30005	0.0349229	0.133851
59.459	0.299983	0.0343234	0.133521
59.61	0.298761	0.0349145	0.132869
59.76	0.298115	0.0351079	0.132768
59.91	0.29669	0.0346688	0.131853
60.06	0.296505	0.0347542	0.131881
60.21	0.295552	0.0348236	0.130483
60.36	0.294708	0.0345827	0.130573
60.51	0.294247	0.0346438	0.131296
60.661	0.292598	0.0346496	0.130519
60.811	0.292493	0.0345404	0.129283
60.961	0.290934	0.0347891	0.128245
61.111	0.290739	0.0348794	0.12796
61.261	0.290945	0.0351753	0.128201
61.411	0.289078	0.0345047	0.126593
61.562	0.289104	0.0347352	0.126267
61.712	0.288001	0.0344434	0.125729
61.862	0.287735	0.0345887	0.125299
62.012	0.286236	0.0347277	0.125182
62.162	0.285585	0.0347738	0.124314
62.312	0.285245	0.0345612	0.124142
62.462	0.284245	0.0342447	0.124003
62.613	0.283719	0.0347751	0.123491
62.763	0.282605	0.0345755	0.12341
62.913	0.282794	0.0350707	0.122456
63.063	0.280806	0.0348103	0.122167
63.213	0.279427	0.0343508	0.121921
63.363	0.280196	0.0345511	0.121925
63.513	0.279101	0.0342803	0.120772
63.664	0.2785	0.0346628	0.120928
63.814	0.277589	0.0347909	0.120182
63.964	0.276574	0.033972	0.120111
64.114	0.275714	0.0342527	0.119786
64.264	0.274458	0.034583	0.119155
64.414	0.273785	0.0344405	0.119275
64.565	0.273032	0.0348103	0.118804
64.715	0.272647	0.034635	0.118349
64.865	0.272087	0.0344275	0.118068
65.015	0.270992	0.0344027	0.117536
65.165	0.270119	0.0343052	0.117085
65.315	0.269307	0.0346184	0.116527
65.465	0.269201	0.0345735	0.116683
65.616	0.268383	0.0343568	0.116445
65.766	0.267455	0.0341668	0.115882
65.916	0.267021	0.0344352	0.11555
66.066	0.265516	0.0342619	0.115099
66.216	0.265114	0.0346668	0.114513
66.366	0.264153	0.0348896	0.114439
66.516	0.26371	0.0342752	0.113769
66.667	0.263456	0.0347941	0.113772
66.817	0.261747	0.0350592	0.11324
66.967	0.262076	0.0344793	0.112925
67.117	0.260989	0.0346273	0.112922
67.267	0.259759	0.0343651	0.112247
67.417	0.259546	0.0349379	0.112372
67.568	0.259166	0.034142	0.111406
67.718	0.258486	0.0341252	0.111132
67.868	0.256179	0.0347958	0.110902
68.018	0.256472	0.0349613	0.110375
68.168	0.255745	0.0348131	0.110923
68.318	0.254227	0.0345312	0.1103
68.468	0.255119	0.0344633	0.109852
68.619	0.252997	0.0343676	0.109501
68.769	0.252457	0.0344147	0.109285
68.919	0.251542	0.0343391	0.108955
69.069	0.250919	0.0340791	0.108538
69.219	0.250468	0.0344994	0.108387
69.369	0.249861	0.034621	0.107666
69.519	0.249613	0.0347426	0.107738
69.67	0.247629	0.0347894	0.106922
69.82	0.247386	0.0344572	0.106456
69.97	0.247417	0.0342804	0.106737
70.12	0.245742	0.0343198	0.106282
70.27	0.245522	0.0346277	0.105877
70.42	0.244877	0.0347737	0.105396
70.571	0.244584	0.0343782	0.105538
70.721	0.24377	0.0346161	0.105236
70.871	0.242988	0.0343997	0.104648
71.021	0.242462	0.0343197	0.1045
71.171	0.241271	0.0345147	0.104245
71.321	0.240763	0.0344305	0.103758
71.471	0.240508	0.0342679	0.103696
71.622	0.240332	0.0346103	0.103038
71.772	0.239466	0.0342706	0.103075
71.922	0.238394	0.0342729	0.102524
72.072	0.238406	0.034179	0.102438
72.222	0.236781	0.0344875	0.101888
72.372	0.236322	0.034279	0.101767
72.522	0.236396	0.0344178	0.101493
72.673	0.234969	0.0346249	0.101226
72.823	0.234983	0.0342484	0.101219
72.973	0.233066	0.0344139	0.100564
73.123	0.232772	0.0343751	0.100515
73.273	0.232649	0.0346316	0.100171
73.423	0.23222	0.0343667	0.0999443
73.574	0.231464	0.0344208	0.0995699
73.724	0.230427	0.0345352	0.098948
73.874	0.229653	0.0344766	0.0990809
74.024	0.228612	0.0340085	0.0987303
74.174	0.22835	0.0341756	0.0983655
74.324	0.228177	0.0344609	0.0983427
74.474	0.227786	0.0343499	0.0977301
74.625	0.227282	0.0343826	0.0978256
74.775	0.22588	0.034351	0.0972474
74.925	0.225298	0.0343404	0.0970577
75.075	0.224407	0.0344324	0.0967908
75.225	0.224602	0.0344492	0.0964314
75.375	0.224471	0.0343378	0.0964199
75.525	0.222825	0.0344003	0.0960869
75.676	0.223311	0.0343104	0.0960858
75.826	0.220993	0.0340526	0.0957167
75.976	0.220734	0.0341774	0.095514
76.126	0.22042	0.0345577	0.0951529
76.276	0.219642	0.034452	0.0948472
76.426	0.21911	0.0343992	0.0948592
76.577	0.218233	0.0342848	0.0943198
76.727	0.218427	0.0346281	0.0938406
76.877	0.217029	0.0345678	0.0938517
77.027	0.216302	0.0343663	0.0933732
77.177	0.216033	0.0344577	0.0934853
77.327	0.215227	0.034292	0.0931133
77.477	0.214882	0.0338576	0.0928292
77.628	0.213524	0.0340337	0.0923573
77.778	0.213099	0.0342457	0.0922023
77.928	0.212245	0.0339225	0.0920289
78.078	0.212148	0.034459	0.0917096
78.228	0.212502	0.0343668	0.0915749
78.378	0.210583	0.0343292	0.0913841
78.528	0.2104	0.033797	0.0912182
78.679	0.209815	0.0343792	0.0908087
78.829	0.209779	0.0342889	0.0906736
78.979	0.208782	0.0342388	0.0908578
79.129	0.208648	0.0343474	0.0900545
79.279	0.208246	0.0341649	0.0902521
79.429	0.207365	0.0340561	0.0899397
79.58	0.206755	0.0344581	0.0894618
79.73	0.206939	0.0337864	0.0894931
79.88	0.206285	0.0343679	0.0892134
80.03	0.20628	0.0339988	0.0895597
80.18	0.204811	0.034315	0.0890356
80.33	0.204413	0.0341049	0.0887196
80.48	0.203941	0.0339249	0.0882979
80.631	0.202999	0.0342593	0.0882466
80.781	0.203504	0.0342468	0.0885463
80.931	0.202247	0.0342232	0.0877629
81.081	0.202074	0.0340412	0.0874832
81.231	0.201125	0.0341603	0.0873379
81.381	0.201067	0.0341032	0.0873831
81.532	0.200716	0.0343916	0.0874189
81.682	0.199696	0.0339612	0.0866313
81.832	0.199351	0.0339168	0.0863354
81.982	0.198232	0.0342745	0.0860393
82.132	0.197525	0.0339307	0.086043
82.282	0.198058	0.0342051	0.0860963
82.432	0.196885	0.0342195	0.0855444
82.583	0.196247	0.0338738	0.0853313
82.733	0.195344	0.034338	0.0850608
82.883	0.194772	0.0340537	0.0851443
83.033	0.194262	0.0345447	0.0849288
83.183	0.193229	0.0343891	0.0848528
83.333	0.193662	0.0339648	0.0847456
83.483	0.192814	0.0339508	0.0844867
83.634	0.192399	0.034235	0.0839741
83.784	0.191166	0.0341814	0.0840922
83.934	0.191275	0.034338	0.0836922
84.084	0.190876	0.0338917	0.0836445
84.234	0.189826	0.0342496	0.083214
84.384	0.189709	0.0345575	0.083225
84.535	0.188419	0.0339955	0.0832267
84.685	0.188259	0.0345129	0.0827319
84.835	0.187665	0.0341453	0.0825966
84.985	0.187838	0.0341178	0.0822979
85.135	0.187429	0.0345585	0.0822215
85.285	0.186646	0.0340403	0.0820493
85.435	0.186574	0.0340367	0.0817847
85.586	0.186788	0.0338615	0.081487
85.736	0.185884	0.0340992	0.0812978
85.886	0.185272	0.0340812	0.0815732
86.036	0.184417	0.0342064	0.0809785
86.186	0.184419	0.0338605	0.0809809
86.336	0.183783	0.0340858	0.0806415
86.486	0.183253	0.0342395	0.0805884
86.637	0.182826	0.0340169	0.080363
86.787	0.182108	0.0340907	0.0800121
86.937	0.181811	0.0341114	0.0800388
87.087	0.18161	0.0338225	0.0796282
87.237	0.181198	0.0337929	0.0798242
87.387	0.180587	0.0341751	0.0794603
87.538	0.180196	0.0335576	0.079462
87.688	0.179823	0.034022	0.0792914
87.838	0.179025	0.0338944	0.0792285
87.988	0.179368	0.0342202	0.0786931
88.138	0.178044	0.0339816	0.0782612
88.288	0.177823	0.0345357	0.0782912
88.438	0.17774	0.0341848	0.0783635
88.589	0.177343	0.0339258	0.0779947
88.739	0.176894	0.0342734	0.0779426
88.889	0.17557	0.0340622	0.0777332
89.039	0.175517	0.0340816	0.0775996
89.189	0.174812	0.033956	0.0776981
89.339	0.174738	0.0341778	0.0771547
89.489	0.174811	0.0343386	0.0772654
89.64	0.173784	0.0338595	0.0770583
89.79	0.173652	0.0340586	0.0770376
89.94	0.172844	0.0337948	0.0764498
90.09	0.172813	0.0341643	0.0765472
90.24	0.171712	0.0340775	0.0762991
90.39	0.171254	0.0341305	0.0760687
90.541	0.171232	0.034274	0.0762229
90.691	0.170053	0.034109	0.0756732
90.841	0.169961	0.0339023	0.0753123
90.991	0.170131	0.0342939	0.0754287
91.141	0.169089	0.0339538	0.0749498
91.291	0.169286	0.0338104	0.0752827
91.441	0.168147	0.0341015	0.0751769
91.592	0.16834	0.0342062	0.0748093
91.742	0.167725	0.0342585	0.0746901
91.892	0.167616	0.0338017	0.0744705
92.042	0.167182	0.0342756	0.0744185
92.192	0.166339	0.033964	0.0742001
92.342	0.165919	0.0340476	0.0742453
92.492	0.165118	0.0339219	0.0740814
92.643	0.164562	0.0341728	0.0739324
92.793	0.164005	0.034044	0.073858
92.943	0.164317	0.0340453	0.0734919
93.093	0.164412	0.0343172	0.0733866
93.243	0.163837	0.034152	0.0731906
93.393	0.16325	0.0337525	0.073071
93.544	0.162901	0.0340416	0.0729904
93.694	0.162475	0.0340931	0.0731212
93.844	0.161988	0.0336925	0.0730463
93.994	0.161107	0.0340773	0.0724767
94.144	0.160847	0.0337951	0.0721821
94.294	0.160428	0.034144	0.072089
94.444	0.159558	0.0338561	0.072205
94.595	0.159293	0.0342268	0.0719464
94.745	0.15876	0.0339263	0.0718054
94.895	0.158625	0.0340572	0.0716859
95.045	0.158431	0.0338177	0.0715609
95.195	0.158314	0.0340936	0.0714844
95.345	0.157398	0.0342566	0.071174
95.495	0.157565	0.0339161	0.0712165
95.646	0.156902	0.0344181	0.0711187
95.796	0.156316	0.0338259	0.0706309
95.946	0.156932	0.0337203	0.0708464
96.096	0.155516	0.0336821	0.0708515
96.246	0.155107	0.0340006	0.0704361
96.396	0.155141	0.0338579	0.0703741
96.547	0.154388	0.0337665	0.0701431
96.697	0.154318	0.0336899	0.0700357
96.847	0.15368	0.0339019	0.0699762
96.997	0.153728	0.0341331	0.0700334
97.147	0.152941	0.0339366	0.0697685
97.297	0.152706	0.0338743	0.0696113
97.447	0.152589	0.0341464	0.0694402
97.598	0.151429	0.0336035	0.0692893
97.748	0.151801	0.0338381	0.0695014
97.898	0.150909	0.0340398	0.0692065
98.048	0.15096	0.0339315	0.0690654
98.198	0.15055	0.033733	0.0691416
98.348	0.150318	0.0339738	0.0687166
98.498	0.150134	0.0338397	0.0687684
98.649	0.149331	0.0340732	0.0684117
98.799	0.148955	0.0336065	0.068346
98.949	0.148798	0.0342055	0.0683449
99.099	0.148894	0.0341679	0.0682592
99.249	0.148653	0.0342076	0.0682785
99.399	0.1474	0.0340274	0.0679438
99.55	0.147298	0.0341156	0.0680928
99.7	0.146916	0.0339954	0.0680137
99.85	0.146311	0.0338038	0.0675084
100	0.146265	0.0339304	0.0674886
100.15	0.145505	0.0337823	0.0672769
100.3	0.145248	0.0336561	0.0670829
100.45	0.144768	0.0340034	0.0669193
100.601	0.144688	0.0335792	0.0668741
100.751	0.144705	0.0335776	0.0672422
100.901	0.144059	0.0340711	0.0669351
101.051	0.143886	0.0338744	0.0671044
101.201	0.142911	0.0337994	0.0668217
101.351	0.14252	0.0339495	0.066403
101.501	0.142222	0.0341014	0.0663276
101.652	0.141933	0.0340459	0.0665261
101.802	0.141435	0.0340709	0.0664237
101.952	0.140998	0.0341305	0.065959
102.102	0.140865	0.033905	0.0659216
102.252	0.140659	0.0339692	0.0659142
102.402	0.140665	0.0339765	0.0653639
102.553	0.140194	0.0335316	0.0655
102.703	0.139778	0.0340299	0.0653897
102.853	0.139449	0.0335484	0.0652878
103.003	0.138761	0.0338943	0.0653506
103.153	0.138438	0.0339364	0.0648292
103.303	0.138028	0.0341466	0.0649297
103.453	0.138024	0.0339416	0.0648799
103.604	0.137951	0.0335217	0.0647877
103.754	0.137335	0.0339295	0.06448
103.904	0.136538	0.0340852	0.0642411
104.054	0.13605	0.0338739	0.0642532
104.204	0.135753	0.0339152	0.0642997
104.354	0.135891	0.0335348	0.0643436
104.504	0.135787	0.0336852	0.0639763
104.655	0.135558	0.0337864	0.0639712
104.805	0.1347	0.0334766	0.0640106
104.955	0.134325	0.0338585	0.0636749
105.105	0.1343	0.0337129	0.0640281
105.255	0.134064	0.0339401	0.0634725
105.405	0.133753	0.0337034	0.0635994
105.556	0.133322	0.0336415	0.0634703
105.706	0.133256	0.0339279	0.0632843
105.856	0.132741	0.033724	0.0631285
106.006	0.132672	0.0340849	0.0632018
106.156	0.132423	0.0341433	0.0628198
106.306	0.132033	0.0335565	0.0626935
106.456	0.131434	0.0337037	0.0623371
106.607	0.131433	0.0338244	0.0624667
106.757	0.130943	0.033786	0.0623268
106.907	0.130277	0.0336895	0.0622244
107.057	0.130069	0.0333577	0.062038
107.207	0.129969	0.0340051	0.0617491
107.357	0.129419	0.033578	0.0619478
107.507	0.129098	0.0339226	0.0616506
107.658	0.128778	0.0340144	0.0618609
107.808	0.128573	0.0338284	0.0615954
107.958	0.12838	0.0336571	0.0614728
108.108	0.127819	0.0338745	0.0614907
108.258	0.127618	0.0338093	0.0617394
108.408	0.127137	0.0337129	0.0612955
108.559	0.127034	0.0340253	0.061109
108.709	0.126578	0.0338105	0.0611517
108.859	0.126331	0.0335058	0.0611074
109.009	0.126107	0.033813	0.0608165
109.159	0.125436	0.0338729	0.0605982
109.309	0.125677	0.0340309	0.060655
109.459	0.125402	0.0339395	0.060479
109.61	0.12492	0.0336416	0.060187
109.76	0.124981	0.0339206	0.0605762
109.91	0.123939	0.0337774	0.0601987
110.06	0.124	0.0335838	0.0605119
110.21	0.123358	0.0336888	0.060008
110.36	0.123519	0.0338803	0.0599111
110.51	0.123566	0.0337685	0.0600347
110.661	0.123023	0.0335606	0.0599638
110.811	0.123078	0.0334812	0.0598258
110.961	0.122337	0.0334224	0.0594429
111.111	0.122288	0.0335909	0.0595871
111.261	0.121842	0.0337708	0.0595664
111.411	0.121642	0.0340121	0.0592437
111.562	0.121798	0.0335498	0.0591045
111.712	0.120886	0.0336868	0.0589022
111.862	0.120662	0.0334697	0.0589324
112.012	0.120393	0.0338277	0.059314
112.162	0.120392	0.0338811	0.0591113
112.312	0.119919	0.033458	0.0588322
112.462	0.119665	0.0339659	0.0583056
112.613	0.119582	0.0338925	0.0587176
112.763	0.11911	0.0340742	0.0584925
112.913	0.118958	0.0336116	0.0586337
113.063	0.118714	0.0337419	0.0583472
113.213	0.118157	0.033864	0.0586164
113.363	0.118248	0.0335724	0.0582015
113.513	0.11793	0.0338927	0.0582054
113.664	0.117703	0.0338089	0.0579822
113.814	0.117201	0.0335525	0.0579908
113.964	0.117055	0.0338511	0.0580786
114.114	0.116601	0.033816	0.057693
114.264	0.116656	0.0337479	0.0576986
114.414	0.116666	0.0338984	0.0574258
114.565	0.116054	0.0339182	0.0575078
114.715	0.115572	0.0332253	0.057254
114.865	0.115611	0.0335728	0.0575523
115.015	0.115122	0.0337658	0.0573775
115.165	0.115227	0.0339898	0.057299
115.315	0.114408	0.0335134	0.0571969
115.465	0.114296	0.0334091	0.0568951
115.616	0.114131	0.0336977	0.0567261
115.766	0.114392	0.033754	0.0567656
115.916	0.113761	0.0335074	0.0569935
116.066	0.113589	0.0339203	0.0567711
116.216	0.113102	0.033841	0.0564627
116.366	0.113285	0.0332487	0.0562379
116.516	0.112853	0.0336674	0.0564451
116.667	0.112446	0.0335967	0.056642
116.817	0.112007	0.0333956	0.0560683
116.967	0.111925	0.0337487	0.0560923
117.117	0.111854	0.0341361	0.0559737
117.267	0.111901	0.0338127	0.0558358
117.417	0.111589	0.0337169	0.0561253
117.568	0.111282	0.0337654	0.0558472
117.718	0.11141	0.033631	0.0558899
117.868	0.110667	0.0337022	0.055762
118.018	0.110739	0.0338905	0.0554139
118.168	0.1102	0.033879	0.055122
118.318	0.109607	0.0335038	0.0554712
118.468	0.109357	0.0334267	0.0555785
118.619	0.109512	0.0337508	0.0550489
118.769	0.109651	0.0336455	0.0550473
118.919	0.109095	0.0336884	0.0550991
119.069	0.109208	0.0339979	0.054951
119.219	0.108413	0.0339361	0.0549719
119.369	0.108252	0.0338161	0.0546566
119.519	0.108244	0.0338942	0.0543214
119.67	0.107943	0.033463	0.0551206
119.82	0.107678	0.0331336	0.054439
119.97	0.107121	0.0337539	0.0544783
120.12	0.107246	0.0338551	0.0543817
120.27	0.107041	0.0333835	0.0543542
120.42	0.106782	0.033738	0.054222
120.571	0.106539	0.0339686	0.0542437
120.721	0.106195	0.0336093	0.0540192
120.871	0.106098	0.0334559	0.05395
121.021	0.105627	0.0338175	0.0539923
121.171	0.10546	0.0334691	0.0538447
121.321	0.105356	0.033994	0.0541669
121.471	0.1048	0.0333101	0.0539959
121.622	0.10495	0.0333137	0.053376
121.772	0.104811	0.0340821	0.0539284
121.922	0.104384	0.0339736	0.0533071
122.072	0.104122	0.0336714	0.0533502
122.222	0.103838	0.0336795	0.052941
122.372	0.103929	0.0335828	0.0532615
122.522	0.103793	0.0336953	0.0533437
122.673	0.103551	0.0341331	0.0530549
122.823	0.103326	0.0340986	0.0530974
122.973	0.102802	0.0333743	0.0525831
123.123	0.102559	0.0334982	0.052804
123.273	0.102309	0.0335575	0.0524138
123.423	0.102133	0.0330795	0.052755
123.574	0.101667	0.0337853	0.0529198
123.724	0.101738	0.0335234	0.0525149
123.874	0.101973	0.0339282	0.0524915
124.024	0.101754	0.0337141	0.0524307
124.174	0.101426	0.0336091	0.0525012
124.324	0.101178	0.0338058	0.0524574
124.474	0.100764	0.0338479	0.0521901
124.625	0.100373	0.0338518	0.0522461
124.775	0.100272	0.0336684	0.0517332
124.925	0.100547	0.0334774	0.0519811
125.075	0.100037	0.033755	0.0518747
125.225	0.0996921	0.0334561	0.0520554
125.375	0.0996038	0.0338622	0.0519182
125.525	0.0992597	0.0334251	0.0517661
125.676	0.0991598	0.0336404	0.0520555
125.826	0.0984798	0.0336718	0.0518031
125.976	0.0986702	0.0333432	0.0514872
126.126	0.0985283	0.0335991	0.0513846
126.276	0.098469	0.0335088	0.0515351
126.426	0.098092	0.0333728	0.0515
126.577	0.0977177	0.0334481	0.0514785
126.727	0.0976876	0.0334701	0.0513659
126.877	0.0976715	0.0333281	0.0512575
127.027	0.0970683	0.0337216	0.0508676
127.177	0.0973907	0.0336413	0.0509009
127.327	0.0969153	0.0338188	0.0510843
127.477	0.0969675	0.0340838	0.0507064
127.628	0.0968721	0.033506	0.0509263
127.778	0.0963609	0.0335655	0.0503583
127.928	0.0964182	0.0334591	0.0504594
128.078	0.0962811	0.033442	0.050959
128.228	0.0960767	0.0331567	0.0507548
128.378	0.0956926	0.0337095	0.0504295
128.528	0.095565	0.0335179	0.0505952
128.679	0.0952934	0.0334901	0.050513
128.829	0.0954292	0.0338656	0.0504366
128.979	0.095255	0.0334181	0.0504001
129.129	0.094705	0.033575	0.0504471
129.279	0.0947637	0.0333422	0.0502134
129.429	0.0943544	0.0335022	0.0500833
129.58	0.0937369	0.0335264	0.0503674
129.73	0.0939133	0.033617	0.0500748
129.88	0.0936405	0.0335624	0.0499036
130.03	0.0937094	0.0339616	0.0499616
130.18	0.0930672	0.0334557	0.0498838
130.33	0.0932874	0.033585	0.0500604
130.48	0.0931737	0.0340028	0.0497951
130.631	0.0929709	0.0334298	0.0498052
130.781	0.0926641	0.0338486	0.0495505
130.931	0.0924805	0.0337632	0.0493421
131.081	0.0924355	0.0335735	0.0494373
131.231	0.0924153	0.0337663	0.0493509
131.381	0.0926307	0.0337131	0.0491308
131.531	0.0919674	0.0337289	0.049296
131.682	0.0914598	0.0336685	0.0490913
131.832	0.0918362	0.0333394	0.0492871
131.982	0.0910895	0.0334758	0.0492276
132.132	0.091192	0.0332226	0.0488471
132.282	0.0909386	0.0338883	0.0491209
132.432	0.0907822	0.0337811	0.0489312
132.583	0.0909714	0.033452	0.048913
132.733	0.09092	0.0336419	0.0488755
132.883	0.0905389	0.0333957	0.0485904
133.033	0.0904541	0.0334812	0.0487441
133.183	0.0900663	0.0334151	0.0487209
133.333	0.0900398	0.0335149	0.0488386
133.483	0.0896041	0.0331022	0.0483929
133.634	0.089914	0.0336662	0.0483823
133.784	0.0893585	0.0337224	0.0485032
133.934	0.089308	0.0337576	0.048374
134.084	0.0891903	0.0337372	0.0483364
134.234	0.0891685	0.0335612	0.0479586
134.384	0.0892187	0.0334655	0.0483858
134.534	0.0887218	0.0333244	0.0479223
134.685	0.0887543	0.0333814	0.0479728
134.835	0.0884999	0.0339446	0.0477782
134.985	0.0883532	0.0334396	0.0481597
135.135	0.088337	0.0334184	0.0482032
135.285	0.0879744	0.0334544	0.0480579
135.435	0.0879417	0.0334807	0.0478595
135.586	0.0875559	0.0334143	0.0475304
135.736	0.0876822	0.0334366	0.0476436
135.886	0.087294	0.0338318	0.0476497
136.036	0.087213	0.0334514	0.0477006
136.186	0.087311	0.0332393	0.0477728
136.336	0.086842	0.0338954	0.0473321
136.486	0.0870882	0.0336488	0.0476302
136.637	0.0865946	0.0336733	0.0473155
136.787	0.0865729	0.0333997	0.0475514
136.937	0.0861463	0.0333962	0.0473236
137.087	0.0864927	0.0335004	0.0471948
137.237	0.0861781	0.0338288	0.0469533
137.387	0.0857872	0.0332384	0.0473605
137.537	0.0859523	0.0339244	0.0472178
137.688	0.0857979	0.0332005	0.047139
137.838	0.0854095	0.0335795	0.0470332
137.988	0.0857151	0.0335932	0.0472417
138.138	0.0851401	0.033566	0.0470224
138.288	0.0851035	0.0330277	0.0470508
138.438	0.0850436	0.0333212	0.0468922
138.589	0.0849904	0.0332956	0.0468556
138.739	0.0846675	0.0333544	0.0468556
138.889	0.0845061	0.0334717	0.0466491
139.039	0.0842038	0.0332981	0.0464951
139.189	0.0842212	0.0339018	0.0464622
139.339	0.084182	0.0335767	0.0463034
139.489	0.0837728	0.0335542	0.046493
139.64	0.084026	0.0335197	0.0463605
139.79	0.0838393	0.0336009	0.0461978
139.94	0.0831761	0.0333108	0.0463871
140.09	0.0836121	0.0335466	0.0463899
140.24	0.0832832	0.03334	0.0462071
140.39	0.0830028	0.0333725	0.0461003
140.54	0.0830909	0.0330303	0.0461256
140.691	0.0829337	0.0336566	0.0462191
140.841	0.0828291	0.0334735	0.0461908
140.991	0.0826919	0.0336572	0.046361
141.141	0.0825099	0.0335956	0.0459327
141.291	0.0824899	0.033222	0.0458279
141.441	0.0824463	0.0332709	0.0459577
141.592	0.0822973	0.0335812	0.0458675
141.742	0.0819637	0.0336703	0.0455412
141.892	0.0819759	0.0338414	0.045799
142.042	0.0820253	0.0338759	0.0458326
142.192	0.0818531	0.0333101	0.045521
142.342	0.0818227	0.03389	0.0457997
142.492	0.081705	0.0334799	0.0453847
142.643	0.081384	0.0337987	0.0456721
142.793	0.0814876	0.0334663	0.0453964
142.943	0.0812256	0.0335663	0.0452534
143.093	0.0812176	0.0333467	0.045436
143.243	0.0811069	0.0334834	0.0454344
143.393	0.0808233	0.0333331	0.0451608
143.543	0.080775	0.033495	0.0451822
143.694	0.0807212	0.0330467	0.0450314
143.844	0.0805409	0.0333549	0.0451287
143.994	0.0802648	0.0334934	0.0451506
144.144	0.0804846	0.0334229	0.0452044
144.294	0.0803889	0.0334265	0.0448432
144.444	0.0803882	0.0335965	0.0449957
144.595	0.0799494	0.0333232	0.0449241
144.745	0.0800565	0.0336065	0.0448021
144.895	0.0799088	0.0333324	0.0447993
145.045	0.0797038	0.0334195	0.0446681
145.195	0.0796987	0.0335817	0.0447833
145.345	0.0796614	0.0334658	0.0445705
145.495	0.0797272	0.0333811	0.0447546
145.646	0.0795766	0.0335279	0.0445299
145.796	0.0794936	0.0334419	0.0445888
145.946	0.0797124	0.0332902	0.0445355
146.096	0.079112	0.0339149	0.044487
146.246	0.0792546	0.0332411	0.0446752
146.396	0.0791394	0.0334848	0.0446151
146.546	0.0791788	0.0331611	0.0444451
146.697	0.0794131	0.0332666	0.0444172
146.847	0.0786732	0.0332356	0.044376
146.997	0.0788092	0.0331576	0.0445184
147.147	0.0785937	0.0333431	0.0443323
147.297	0.0787607	0.0335868	0.0443408
147.447	0.0788117	0.0337465	0.0440208
147.598	0.0783928	0.0334311	0.043857
147.748	0.0785965	0.0335678	0.044228
147.898	0.078406	0.0334461	0.0439872
148.048	0.0784922	0.0336577	0.0438055
148.198	0.0783199	0.0333942	0.0441017
148.348	0.0781125	0.0334026	0.0439362
148.498	0.0783079	0.0333581	0.043689
148.649	0.0778697	0.0333552	0.0438119
148.799	0.0781893	0.0334534	0.0436764
148.949	0.0774488	0.0333935	0.0438256
149.099	0.0775994	0.0330466	0.0435954
149.249	0.0776189	0.033917	0.0438191
149.399	0.0775874	0.0332955	0.0435757
149.549	0.0774023	0.0335978	0.0438197
149.7	0.0770472	0.033754	0.0436416
149.85	0.0772503	0.033394	0.0436558
150	0.0770052	0.0335184	0.0437487
150.15	0.0770098	0.0337049	0.0436332
150.3	0.0769466	0.0336159	0.0434514
150.45	0.0770009	0.0338437	0.0434913
150.601	0.0768427	0.0336702	0.0434259
150.751	0.0765046	0.0339748	0.0435201
150.901	0.0765852	0.033831	0.0434399
151.051	0.0766045	0.0338232	0.0432551
151.201	0.0766816	0.0337816	0.0436265
151.351	0.0765351	0.0340629	0.0431265
151.501	0.0763451	0.0337836	0.0431541
151.652	0.0764075	0.0341831	0.043224
151.802	0.0761508	0.033903	0.0431497
151.952	0.0761157	0.0338248	0.0432547
152.102	0.0763708	0.0336102	0.0433013
152.252	0.0762581	0.0332454	0.0431748
152.402	0.0761747	0.033775	0.04291
152.552	0.0759549	0.033908	0.0429643
152.703	0.0755849	0.0335191	0.043058
152.853	0.0758508	0.0336232	0.0429639
153.003	0.0758062	0.0339062	0.0430656
153.153	0.0754767	0.0337666	0.0430673
153.303	0.0753564	0.0335054	0.0425159
153.453	0.0754842	0.0337885	0.0427984
153.604	0.0755648	0.0340067	0.042851
153.754	0.0752996	0.0336356	0.0426527
153.904	0.0752634	0.0339134	0.0427016
154.054	0.0752961	0.0338102	0.0426814
154.204	0.0749634	0.0335814	0.0425292
154.354	0.0751078	0.0340589	0.0425223
154.504	0.0751532	0.0337193	0.0428302
154.655	0.0755046	0.0333282	0.0427317
154.805	0.0747738	0.0337183	0.042748
154.955	0.0747625	0.0339931	0.0425185
155.105	0.0746125	0.0333421	0.0423867
155.255	0.0749078	0.0331837	0.0423994
155.405	0.0747499	0.0333463	0.0424621
155.555	0.0746481	0.0329241	0.0420763
155.706	0.0746968	0.0337786	0.0422742
155.856	0.0744147	0.0334877	0.042306
156.006	0.0743986	0.0337064	0.042287
156.156	0.0744461	0.0334917	0.0419452
156.306	0.0743743	0.033566	0.0421414
156.456	0.0742079	0.0335138	0.0419709
156.607	0.0741606	0.0332591	0.0421487
156.757	0.0743711	0.0330641	0.0423523
156.907	0.0739896	0.0336005	0.0419891
157.057	0.0739001	0.0335761	0.041859
157.207	0.0737527	0.0332199	0.0424896
157.357	0.0739083	0.0335252	0.0418536
157.507	0.0738055	0.0332855	0.0419192
157.658	0.0735187	0.0332467	0.0417277
157.808	0.0736078	0.0334657	0.0418082
157.958	0.0735753	0.0335754	0.0420391
158.108	0.0738363	0.0331347	0.0417052
158.258	0.0734644	0.0336011	0.0416919
158.408	0.073402	0.0330009	0.0419697
158.559	0.0732379	0.0335381	0.0418023
158.709	0.0730869	0.0333708	0.0418516
158.859	0.0729559	0.0333538	0.0418406
159.009	0.0730197	0.0333007	0.0418758
159.159	0.0726677	0.0332902	0.0416087
159.309	0.0730124	0.033496	0.0418854
159.459	0.0726476	0.0333601	0.0414459
159.61	0.0729054	0.0336084	0.0416721
159.76	0.0726709	0.0332361	0.0416201
159.91	0.0729451	0.0334599	0.0414798
160.06	0.0728044	0.0333606	0.0412709
160.21	0.0725761	0.0334787	0.0412564
160.36	0.0726135	0.0333273	0.0415142
160.51	0.0723762	0.0330734	0.0415267
160.661	0.0723217	0.0332512	0.0412505
160.811	0.0725256	0.0333264	0.0413687
160.961	0.0720082	0.0334939	0.0413878
161.111	0.0725542	0.0331759	0.0413453
161.261	0.0721546	0.0334169	0.0412715
161.411	0.0720288	0.033684	0.0412266
161.561	0.0720702	0.0335202	0.0412967
161.712	0.0721675	0.0333357	0.0410576
161.862	0.0718781	0.0331283	0.0410199
162.012	0.0720647	0.0330169	0.041343
162.162	0.0717638	0.0333527	0.0410797
162.312	0.0719261	0.032963	0.0413307
162.462	0.0717349	0.0331781	0.0411962
162.613	0.0719671	0.0336894	0.0411176
162.763	0.071501	0.0335327	0.0408173
162.913	0.0716914	0.0338175	0.0408778
163.063	0.0715566	0.0332937	0.0411809
163.213	0.0716068	0.0336763	0.041108
163.363	0.0716238	0.0335866	0.0408606
163.513	0.0712992	0.0332786	0.0408139
163.664	0.0714023	0.0336985	0.04092
163.814	0.0717032	0.0334348	0.0407062
163.964	0.0713776	0.0333221	0.0409822
164.114	0.071523	0.0335843	0.0407879
164.264	0.0713462	0.0334844	0.0407547
164.414	0.0715051	0.0334417	0.0409992
164.564	0.0710366	0.0332534	0.0406012
164.715	0.0710972	0.0328361	0.0407421
164.865	0.0709495	0.0337318	0.0405152
165.015	0.0709567	0.0333101	0.0405888
165.165	0.0711948	0.0331797	0.0404306
165.315	0.0706082	0.0331615	0.0405259
165.465	0.0707595	0.0330274	0.04077
165.616	0.0707522	0.0333998	0.0403736
165.766	0.0705116	0.0331449	0.0405221
165.916	0.0707071	0.0332351	0.0404674
166.066	0.0703153	0.0332699	0.0404911
166.216	0.0704045	0.0334744	0.0407822
166.366	0.0704572	0.0332407	0.0406984
166.516	0.0704532	0.0333928	0.040345
166.667	0.0704278	0.033367	0.0404207
166.817	0.070677	0.0332712	0.040185
166.967	0.070511	0.0333282	0.0403132
167.117	0.0700258	0.0330443	0.0403117
167.267	0.0702894	0.0333921	0.0400751
167.417	0.0703014	0.0334489	0.0403603
167.568	0.0701197	0.0334759	0.0401991
167.718	0.0698772	0.0334786	0.0401279
167.868	0.0700722	0.0335704	0.0399438
168.018	0.0700802	0.0332193	0.0399342
168.168	0.0698235	0.033167	0.0400005
168.318	0.0699521	0.0333467	0.0403885
168.468	0.069682	0.0330865	0.0400601
168.619	0.069932	0.0335792	0.0402085
168.769	0.0699039	0.0332435	0.0402765
168.919	0.0695988	0.033173	0.0400108
169.069	0.0695786	0.0332524	0.0399273
169.219	0.0695263	0.0333912	0.0400468
169.369	0.0698427	0.0331666	0.0399879
169.519	0.0695592	0.0333717	0.0401192
169.67	0.0694453	0.0332728	0.0397942
169.82	0.069414	0.0332317	0.0399943
169.97	0.0693764	0.0333908	0.0397878
170.12	0.0693471	0.0335699	0.0400218
170.27	0.0694417	0.0329265	0.0397359
170.42	0.0694993	0.0334882	0.0400542
170.57	0.069362	0.0335674	0.0395823
170.721	0.0692088	0.0330556	0.0397831
170.871	0.069129	0.0334616	0.0399876
171.021	0.0692983	0.0334869	0.0401374
171.171	0.0688436	0.0333056	0.0399591
171.321	0.069363	0.0328623	0.0397484
171.471	0.0691229	0.0331047	0.0395502
171.622	0.0691695	0.0333075	0.0398085
171.772	0.0690856	0.0334686	0.0393506
171.922	0.0688811	0.0334722	0.0396015
172.072	0.0691593	0.0331768	0.039546
172.222	0.0688725	0.0334067	0.0398487
172.372	0.0691896	0.0334888	0.0394876
172.522	0.069005	0.0332025	0.0393734
172.673	0.0689291	0.0332058	0.0395585
172.823	0.0690959	0.0332838	0.0394234
172.973	0.068952	0.0336487	0.0394833
173.123	0.0688992	0.0336882	0.0395479
173.273	0.0686679	0.0336883	0.0393124
173.423	0.0687763	0.033093	0.0394382
173.574	0.0687405	0.033429	0.0394539
173.724	0.0682938	0.0333452	0.0393741
173.874	0.0687841	0.0335498	0.0392386
174.024	0.0686798	0.0329998	0.038942
174.174	0.0683538	0.0333592	0.0393193
174.324	0.0686434	0.0336378	0.0390804
174.474	0.068584	0.0335097	0.0391654
174.625	0.0683248	0.0337975	0.039046
174.775	0.0685138	0.0331309	0.0392834
174.925	0.0686134	0.0331193	0.0392434
175.075	0.0679583	0.0333416	0.0389369
175.225	0.0680319	0.0332807	0.0390591
175.375	0.068555	0.0334921	0.0388313
175.525	0.0682373	0.0337785	0.0389895
175.676	0.0684932	0.0332196	0.0389313
175.826	0.0679078	0.0335954	0.039052
175.976	0.0680714	0.033535	0.0390706
176.126	0.0682188	0.0334332	0.0388873
176.276	0.0682064	0.0333357	0.0391063
176.426	0.0681587	0.0333652	0.0389465
176.577	0.0682507	0.0333488	0.0393075
176.727	0.067983	0.0336174	0.0387888
176.877	0.0678339	0.0334906	0.0386415
177.027	0.0679231	0.0334117	0.0388772
177.177	0.0677577	0.0334848	0.0388189
177.327	0.0678693	0.0334936	0.039067
177.477	0.0678228	0.0331008	0.0388731
177.628	0.0677892	0.033334	0.0388007
177.778	0.0677726	0.0332141	0.0390202
177.928	0.0678078	0.0328779	0.0387831
178.078	0.0677588	0.0336859	0.0387033
178.228	0.0676719	0.0333569	0.0388719
178.378	0.0677257	0.033404	0.0390522
178.528	0.0676972	0.0333601	0.0387611
178.679	0.0674718	0.0333539	0.0384094
178.829	0.0678579	0.0331034	0.0384263
178.979	0.0676959	0.0331825	0.0389427
179.129	0.0678766	0.0329353	0.0386259
179.279	0.0677677	0.033493	0.0383442
179.429	0.0674253	0.0334906	0.0385677
179.58	0.0675687	0.0335051	0.0386096
179.73	0.0668793	0.033305	0.0387088
179.88	0.067262	0.0333979	0.0387319
180.03	0.0672098	0.033687	0.038552
180.18	0.0673387	0.0332273	0.0383531
180.33	0.067308	0.0332089	0.0383811
180.48	0.0674192	0.0333565	0.0382716
180.631	0.0674844	0.0334478	0.0386061
180.781	0.067411	0.0332052	0.0382327
180.931	0.0673524	0.0334944	0.0384805
181.081	0.0671745	0.0334019	0.0383936
181.231	0.0671893	0.0337242	0.03857
181.381	0.0667868	0.0330528	0.0386249
181.531	0.0669814	0.0331937	0.0385028
181.682	0.0670541	0.0335785	0.0381846
181.832	0.0671097	0.0333798	0.0386759
181.982	0.0669696	0.0336298	0.0382461
182.132	0.0668937	0.033572	0.0383676
182.282	0.0667925	0.0333108	0.0384095
182.432	0.0671221	0.033466	0.038395
182.583	0.0670554	0.0332504	0.0383073
182.733	0.0668317	0.033428	0.0380565
182.883	0.0669128	0.0330272	0.0381271
183.033	0.0666388	0.0334619	0.038005
183.183	0.0668614	0.033418	0.0384342
183.333	0.0664638	0.0336331	0.0379193
183.483	0.0666283	0.0331325	0.0380745
183.634	0.0665906	0.0335168	0.0380737
183.784	0.0665891	0.0330579	0.037987
183.934	0.066848	0.0333033	0.0382961
184.084	0.0662804	0.0333592	0.0380511
184.234	0.0665562	0.0334888	0.0381533
184.384	0.066567	0.0332946	0.0381333
184.534	0.0662793	0.033357	0.038009
184.685	0.0666452	0.0331989	0.0380117
184.835	0.0663646	0.0332715	0.0377264
184.985	0.0663222	0.0332685	0.0379239
185.135	0.0665549	0.0332787	0.0379483
185.285	0.0664521	0.0333567	0.0378906
185.435	0.0662894	0.033546	0.0376877
185.586	0.0665326	0.0330364	0.0378164
185.736	0.0662682	0.0333211	0.0378993
185.886	0.0661691	0.0330667	0.037789
186.036	0.0663289	0.033146	0.0379537
186.186	0.0662687	0.0331039	0.0379527
186.336	0.0663588	0.0333698	0.0379803
186.486	0.0661956	0.0329687	0.0377643
186.637	0.0662309	0.0332483	0.0378737
186.787	0.0662698	0.0335171	0.0377993
186.937	0.0660373	0.0331314	0.0377753
187.087	0.0661124	0.0330768	0.0378425
187.237	0.0663379	0.0332254	0.0379754
187.387	0.0661052	0.0334667	0.0375553
187.537	0.0662725	0.0335224	0.0376708
187.688	0.0662955	0.0332174	0.037641
187.838	0.0660753	0.0333177	0.0373854
187.988	0.0663541	0.0332464	0.0376289
188.138	0.0660631	0.0335855	0.0375427
188.288	0.0661194	0.0334028	0.0377375
188.438	0.0659773	0.0332503	0.0373212
188.589	0.0657631	0.0329097	0.0379295
188.739	0.0660346	0.033299	0.0376313
188.889	0.0655992	0.0333574	0.0374964
189.039	0.0657919	0.0334173	0.0375998
189.189	0.0657493	0.0333297	0.0373027
189.339	0.0658815	0.0330501	0.0374396
189.489	0.0660051	0.0333069	0.0375181
189.64	0.065824	0.0334129	0.0374545
189.79	0.0658535	0.0336554	0.0374078
189.94	0.0658063	0.0334493	0.0376803
190.09	0.065701	0.0332129	0.0374038
190.24	0.0653071	0.0333756	0.0371803
190.39	0.0658108	0.033471	0.0375774
190.54	0.0657316	0.0330781	0.0374168
190.691	0.0656701	0.0332102	0.0374109
190.841	0.0657481	0.0332858	0.0376492
190.991	0.0654816	0.0330635	0.0372503
191.141	0.065731	0.0331467	0.0370106
191.291	0.0653211	0.0333927	0.0371464
191.441	0.0655396	0.0332059	0.0372671
191.592	0.0653742	0.0333129	0.0374217
191.742	0.0653933	0.0331884	0.0371716
191.892	0.0657027	0.033069	0.0370321
192.042	0.0652309	0.0332668	0.0370005
192.192	0.0653195	0.0333274	0.0370454
192.342	0.0654179	0.0331663	0.0370917
192.492	0.0653699	0.0333417	0.0370657
192.643	0.0656757	0.0331316	0.0371581
192.793	0.065311	0.0334485	0.0368295
192.943	0.0651093	0.0332837	0.0370184
193.093	0.065366	0.0330111	0.0371216
193.243	0.0650461	0.0328302	0.0368171
193.393	0.065302	0.0334055	0.0366611
193.543	0.065232	0.0330984	0.0369204
193.694	0.0650514	0.0330735	0.036946
193.844	0.0650448	0.0330259	0.036952
193.994	0.0649867	0.0329568	0.0369876
194.144	0.0650866	0.0332969	0.0371074
194.294	0.0649574	0.0333947	0.0370287
194.444	0.064871	0.0328555	0.0365978
194.595	0.0649058	0.0332093	0.0366521
194.745	0.0649194	0.0332502	0.0366806
194.895	0.0650598	0.0330104	0.0368337
195.045	0.0648088	0.0333796	0.0365401
195.195	0.0649283	0.0334204	0.0369286
195.345	0.0645651	0.0331638	0.03659
195.495	0.0649895	0.0331867	0.0370363
195.646	0.0649146	0.0332878	0.0365773
195.796	0.0647692	0.0330416	0.0365928
195.946	0.0646121	0.0333987	0.0364427
196.096	0.0647187	0.0330603	0.0370433
196.246	0.0649777	0.032979	0.0367805
196.396	0.064532	0.0330854	0.0365696
196.546	0.0646403	0.0329821	0.0367282
196.697	0.0645378	0.0332394	0.0367819
196.847	0.0644398	0.0329847	0.0365605
196.997	0.0649863	0.03342	0.0364938
197.147	0.0645071	0.0334544	0.0362745
197.297	0.0647933	0.033094	0.0363894
197.447	0.0647229	0.0331479	0.0366329
197.598	0.0644717	0.0331952	0.0363783
197.748	0.0647004	0.0330651	0.036642
197.898	0.064435	0.033184	0.0364518
198.048	0.0646568	0.0336119	0.0365662
198.198	0.0643541	0.0331285	0.0361798
198.348	0.0645062	0.033465	0.0363041
198.498	0.0643289	0.033081	0.0361064
198.649	0.0641624	0.0330767	0.0360848
198.799	0.0642183	0.0332554	0.0360041
198.949	0.0643386	0.0328371	0.036026
199.099	0.064125	0.0332293	0.0360069
199.249	0.0641753	0.0329091	0.0356523
199.399	0.0642416	0.033477	0.0359938
199.549	0.064312	0.0330316	0.0359167
199.7	0.0638963	0.033571	0.0361139
199.85	0.0643015	0.0335361	0.0358996
200	0.0638402	0.0334922	0.0358384
200.15	0.0640556	0.0331369	0.0357878
200.3	0.0640686	0.0333144	0.0361382
200.45	0.0641741	0.0331333	0.0357541
200.601	0.0639035	0.0332758	0.0358395
200.751	0.0637774	0.0334188	0.0357939
200.901	0.0642679	0.0332256	0.0357906
201.051	0.0638914	0.0328286	0.0357985
201.201	0.0638771	0.0331535	0.035947
201.351	0.0640627	0.0331583	0.035959
201.501	0.0639447	0.0336457	0.035453
201.652	0.0639385	0.0331253	0.0358537
201.802	0.0635918	0.0334815	0.0360054
201.952	0.0637846	0.0331174	0.0357537
202.102	0.0638365	0.0335061	0.0355434
202.252	0.0637325	0.0330576	0.0357859
202.402	0.0635801	0.0334926	0.0354398
202.552	0.0634831	0.0332217	0.0357864
202.703	0.0637455	0.0331789	0.0353609
202.853	0.063652	0.0330093	0.0352407
203.003	0.0636059	0.0334225	0.0358523
203.153	0.0639024	0.0329138	0.0355313
203.303	0.0633751	0.0334405	0.0355941
203.453	0.0636522	0.0332038	0.0354335
203.604	0.063464	0.0330053	0.0355381
203.754	0.0632932	0.0332127	0.0354268
203.904	0.063341	0.0329039	0.0354835
204.054	0.06346	0.0333482	0.0353781
204.204	0.0634132	0.0331851	0.0353007
204.354	0.0631679	0.0334291	0.0352561
204.504	0.0632355	0.0332212	0.035347
204.655	0.0634298	0.0333034	0.035358
204.805	0.0633169	0.0331108	0.0352529
204.955	0.0633047	0.0335395	0.0355727
205.105	0.0632411	0.0333304	0.0350163
205.255	0.0631796	0.0331913	0.0353034
205.405	0.0632277	0.0337014	0.0352261
205.555	0.0629749	0.0332625	0.035098
205.706	0.063454	0.0332037	0.0352223
205.856	0.0629154	0.0333453	0.0352562
206.006	0.0634182	0.0331403	0.0351763
206.156	0.0632715	0.0332486	0.0351791
206.306	0.0630123	0.0333338	0.0350208
206.456	0.0632975	0.0332001	0.0351363
206.607	0.0632564	0.033214	0.0349862
206.757	0.0632422	0.0333108	0.0351774
206.907	0.0630646	0.0336433	0.0353658
207.057	0.0630945	0.0332926	0.0351731
207.207	0.0629025	0.0335068	0.0350297
207.357	0.0629846	0.0332758	0.0350591
207.507	0.0631601	0.0333891	0.0351287
207.658	0.0627476	0.0331558	0.0352014
207.808	0.0630333	0.0334473	0.0352156
207.958	0.0626419	0.0333394	0.035048
208.108	0.0627642	0.0328592	0.0353599
208.258	0.063075	0.0330975	0.0350674
208.408	0.0627588	0.0335211	0.0349149
208.558	0.0629408	0.0330898	0.0350572
208.709	0.0628189	0.0329253	0.0350801
208.859	0.0625732	0.0330789	0.034939
209.009	0.0628065	0.0335676	0.034844
209.159	0.0627938	0.0330361	0.0349682
209.309	0.0629019	0.0332836	0.0345884
209.459	0.0626014	0.033424	0.0350833
209.61	0.0625304	0.0330907	0.0347384
209.76	0.062598	0.0332319	0.0349741
209.91	0.0625845	0.0334113	0.0349518
210.06	0.0625208	0.0331582	0.0351052
210.21	0.0625852	0.0332364	0.0347304
210.36	0.0625857	0.0331983	0.0348075
210.51	0.0625523	0.0330715	0.0351407
210.661	0.0626074	0.0330245	0.0349611
210.811	0.0628019	0.0332131	0.0349602
210.961	0.0623497	0.0332491	0.0347594
211.111	0.0623622	0.032788	0.0346849
211.261	0.0626442	0.03318	0.0345088
211.411	0.062605	0.0332521	0.0347956
211.561	0.0622675	0.0331403	0.0346038
211.712	0.0622543	0.0334667	0.0344832
211.862	0.0623802	0.0335881	0.0345125
212.012	0.0625773	0.0332746	0.0346362
212.162	0.0623123	0.0333846	0.0346468
212.312	0.062219	0.0333995	0.0350189
212.462	0.0625024	0.0333931	0.0344499
212.613	0.0621305	0.03372	0.0349244
212.763	0.0623471	0.033379	0.034638
212.913	0.0625458	0.0331709	0.0346564
213.063	0.0619271	0.0334833	0.0347274
213.213	0.0622996	0.0331923	0.0346898
213.363	0.0619502	0.032958	0.0348294
213.513	0.0623059	0.0330279	0.0348073
213.664	0.0624167	0.0330683	0.0345955
213.814	0.0621586	0.0333563	0.0346284
213.964	0.062229	0.0335898	0.0348739
214.114	0.0622375	0.0331349	0.0344799
214.264	0.0619121	0.0335098	0.0346535
214.414	0.0623935	0.033184	0.0345262
214.564	0.0619667	0.033256	0.0347242
214.715	0.0620033	0.0335063	0.0346694
214.865	0.0619187	0.0328623	0.0345684
215.015	0.0618887	0.0334666	0.0344386
215.165	0.0618103	0.0327653	0.0344339
215.315	0.0622595	0.0332251	0.0346636
215.465		0.0334413	0.0347805
215.616		0.0331369	0.0345067
215.766		0.0330756	0.0346542
215.916		0.0333447	0.0347185
216.066		0.0332502	0.0347183
216.216		0.0328364	0.0346264
216.366		0.0330626	0.0343004
216.516		0.0334225	0.0345036
216.667		0.0332812	0.0345586
216.817		0.0330709	0.0346818
216.967		0.0328829	0.0346239
217.117		0.0327763	0.0342915
217.267		0.0332631	0.034443
217.417		0.0329133	0.0344862
217.567		0.0333064	0.0345714
217.718		0.0331869	0.034481
217.868		0.0334526	0.0345695
218.018		0.0333653	0.0346385
218.168		0.0332863	0.0346783
218.318		0.0336589	0.0342895
218.468		0.0332368	0.0342114
218.619		0.0335448	0.0344439
218.769		0.0334246	0.0345298
218.919		0.0334322	0.0344466
219.069		0.0332281	0.0343977
219.219		0.033629	0.034005
219.369		0.0328589	0.0342562
219.519		0.0333472	0.0344573
219.67		0.0329181	0.0344484
219.82		0.0333958	0.0346472
219.97		0.0328631	0.0341738
220.12		0.0328969	0.0342166
220.27		0.0333738	0.0346334
220.42		0.0331861	0.0345052
220.57		0.033051	0.0342924
220.721		0.0331067	0.0344754
220.871		0.0331638	0.0343967
221.021		0.0330491	0.0341932
221.171		0.0331359	0.0344072
221.321		0.0334106	0.0344739
221.471		0.0334521	0.0343935
221.622		0.0333169	0.034434
221.772		0.033126	0.0346366
221.922		0.0328629	0.0341915
222.072		0.0332746	0.0341926
222.222		0.0330664	0.034137
222.372			0.0343824
222.522			0.0341991
222.673			0.0340602
222.823			0.0342932
222.973			0.0344363
223.123			0.0341914
223.273			0.0341986
223.423			0.0342985
223.573			0.0340053
223.724			0.0344669
223.874			0.0342767
224.024			0.0341924
224.174			0.034334
224.324			0.0339658
224.474			0.0340487
224.625			0.0341995
224.775			0.0341664
224.925			0.0342353
225.075			0.0338186
225.225			0.0338635
225.375			0.0341249
225.525			0.033838

## Sheet: Figure6D
Control	RhoGDI	RabGGTase Beta
0.0303502	0.347921	0.0502732
0.0238632	0.3524	0.0410462
0.0273907		0.0414374
