# Supplementary material for: Extraction of active RhoGTPases by RhoGDI regulates spatiotemporal patterning of RhoGTPases
Source: eLife. 2019 Oct 24;8:e50471. doi: 10.7554/eLife.50471 (PMC6910828; doi:10.7554/eLife.50471)
Supplement: Figure 7—figure supplement 2—source data 1. [file elife-50471-fig7-figsupp2-data1.xlsx]

## Sheet: SuppFigXX_Q61L_GDIWT_B
Time	Cdc42WTGDP	Cdc42WTGDP	Cdc42WTGDP	Cdc42WTGDP	Cdc42WTGDP	Cdc42Q61LGTP	Cdc42Q61LGTP	Cdc42Q61LGTP	Cdc42Q61LGTP	Cdc42Q61LGTP
sec	XlRhoGDIWT/20uM	XlRhoGDIWT/5uM	XlRhoGDIWT/1.25uM	XlRhoGDIWT/0.3125uM	XlRhoGDIWT/0uM	XlRhoGDIWT/20uM	XlRhoGDIWT/5uM	XlRhoGDIWT/1.25uM	XlRhoGDIWT/0.3125uM	XlRhoGDIWT/0uM
0	1	1	1	1	1	1	1	1	1	1
0.15	0.965604	0.972051	0.981883	0.988795	0.993528	0.98773	0.990506	0.995586	0.996231	0.999415
0.3	0.930028	0.937827	0.959567	0.977492	0.990695	0.97796	0.979574	0.984904	0.99571	0.995474
0.45	0.89734	0.900598	0.936656	0.962564	0.983611	0.964552	0.972054	0.976217	0.992623	0.988566
0.601	0.864202	0.860826	0.916938	0.945622	0.972756	0.9454	0.963967	0.96606	0.985349	0.985759
0.751	0.831268	0.824469	0.896644	0.927959	0.964448	0.928092	0.951415	0.962607	0.977014	0.98401
0.901	0.799563	0.795707	0.873662	0.915527	0.960113	0.914033	0.936808	0.953644	0.969643	0.981386
1.051	0.76836	0.764914	0.848984	0.903542	0.955375	0.90127	0.926293	0.948688	0.965029	0.980676
1.201	0.73161	0.735473	0.827635	0.887237	0.951796	0.88766	0.918216	0.942483	0.961545	0.978512
1.351	0.694702	0.710431	0.802551	0.873401	0.949138	0.875163	0.906254	0.937324	0.955288	0.979266
1.501	0.657379	0.684023	0.777495	0.859693	0.946452	0.857584	0.895917	0.926623	0.952464	0.973425
1.652	0.622387	0.655993	0.753011	0.843227	0.938643	0.831932	0.88953	0.916597	0.950296	0.967016
1.802	0.586002	0.628812	0.734916	0.825363	0.931429	0.811143	0.879698	0.908547	0.939684	0.962437
1.952	0.551049	0.602307	0.714993	0.810646	0.924394	0.795264	0.86473	0.904835	0.933122	0.962449
2.102	0.51749	0.579529	0.696203	0.799183	0.920063	0.784426	0.852503	0.896775	0.926993	0.961574
2.252	0.483376	0.553249	0.678944	0.78505	0.91613	0.772403	0.843949	0.88934	0.923758	0.956896
2.402	0.447363	0.528344	0.662542	0.774145	0.909903	0.758763	0.836056	0.885306	0.917553	0.956988
2.553	0.413221	0.505213	0.643773	0.76249	0.907317	0.749025	0.826097	0.877206	0.913159	0.954705
2.703	0.380953	0.47897	0.624807	0.74811	0.904247	0.738543	0.816331	0.867868	0.910475	0.94774
2.853	0.35107	0.454543	0.605862	0.734306	0.896665	0.723154	0.809354	0.860633	0.907017	0.94128
3.003	0.322586	0.430268	0.591845	0.719355	0.888861	0.709317	0.798809	0.854318	0.897788	0.938108
3.153	0.297126	0.408094	0.577517	0.708389	0.881587	0.695615	0.788308	0.852663	0.891084	0.934917
3.303	0.272643	0.387255	0.563474	0.698344	0.880092	0.686214	0.77622	0.845029	0.887163	0.93399
3.453	0.249444	0.366201	0.549383	0.688601	0.876493	0.672741	0.768506	0.840519	0.883201	0.931311
3.604	0.228035	0.346498	0.53351	0.678825	0.870124	0.662508	0.760153	0.838445	0.878352	0.931036
3.754	0.20824	0.327782	0.517159	0.669709	0.867037	0.653862	0.751093	0.828413	0.875754	0.926363
3.904	0.191443	0.308306	0.501645	0.659144	0.863525	0.642984	0.744921	0.821931	0.872978	0.919868
4.054	0.176512	0.289792	0.487828	0.646985	0.85631	0.629009	0.737801	0.814237	0.866462	0.911345
4.204	0.162534	0.27115	0.474917	0.634243	0.84943	0.617385	0.727686	0.811376	0.858307	0.911167
4.354	0.150608	0.256235	0.462437	0.626293	0.843962	0.607031	0.717066	0.806103	0.849965	0.911845
4.504	0.138633	0.240996	0.449482	0.619264	0.842476	0.596862	0.707276	0.799412	0.849217	0.908467
4.655	0.127785	0.226845	0.437457	0.610409	0.837997	0.585551	0.702047	0.796606	0.844653	0.904484
4.805	0.117894	0.213023	0.422639	0.602529	0.834486	0.57594	0.694189	0.794385	0.839285	0.906017
4.955	0.108044	0.200231	0.408892	0.59505	0.83231	0.568388	0.686607	0.784987	0.837867	0.902287
5.105	0.100018	0.187492	0.395673	0.585558	0.827267	0.559308	0.680952	0.778214	0.835291	0.896271
5.255	0.0933299	0.17467	0.382818	0.575028	0.821064	0.548104	0.673323	0.77152	0.827755	0.890916
5.405	0.0860658	0.163875	0.372514	0.565357	0.813121	0.536141	0.664344	0.768138	0.821402	0.890884
5.556	0.0801177	0.154229	0.360764	0.559445	0.809925	0.527553	0.654264	0.763514	0.816663	0.888966
5.706	0.0749336	0.144597	0.350521	0.550919	0.808139	0.519874	0.647485	0.758261	0.815801	0.884263
5.856	0.0698044	0.135601	0.340404	0.543065	0.804399	0.509502	0.641206	0.756852	0.812392	0.883006
6.006	0.0645563	0.127725	0.32901	0.537386	0.801201	0.502172	0.635149	0.753355	0.807528	0.884207
6.156	0.060143	0.119621	0.317883	0.530598	0.796853	0.495801	0.628091	0.744988	0.805995	0.87761
6.306	0.0567807	0.111954	0.306765	0.521981	0.790657	0.485431	0.625451	0.739693	0.804935	0.870068
6.456	0.0531155	0.104692	0.298222	0.51328	0.785365	0.474106	0.616608	0.734406	0.798871	0.866373
6.607	0.0497737	0.0983146	0.289123	0.504736	0.778393	0.464899	0.60722	0.732151	0.792132	0.865603
6.757	0.0469187	0.0925381	0.281097	0.498884	0.778126	0.457064	0.600842	0.726217	0.787904	0.863209
6.907	0.0446179	0.0869656	0.272244	0.492707	0.774245	0.450194	0.595816	0.722675	0.787542	0.860983
7.057	0.0421118	0.0820944	0.264035	0.485215	0.768897	0.442406	0.589759	0.720802	0.782919	0.861906
7.207	0.0392286	0.0772524	0.254711	0.479993	0.768566	0.435723	0.583232	0.714857	0.780595	0.860491
7.357	0.0369141	0.0728801	0.245447	0.47314	0.765719	0.429003	0.578782	0.709725	0.780438	0.853028
7.507	0.0351063	0.0686215	0.237044	0.465311	0.760978	0.420034	0.575576	0.701974	0.77569	0.84746
7.658	0.0340651	0.0640578	0.230261	0.457385	0.754076	0.409937	0.568157	0.700163	0.770222	0.844921
7.808	0.0324424	0.0606909	0.223096	0.449222	0.748663	0.401611	0.55973	0.697306	0.762624	0.844839
7.958	0.0307287	0.0576456	0.215403	0.44503	0.747059	0.395982	0.55316	0.694191	0.761939	0.843255
8.108	0.0295311	0.0547446	0.209697	0.439001	0.744575	0.389513	0.549736	0.691595	0.759962	0.840053
8.258	0.0280389	0.0512706	0.203171	0.432355	0.741542	0.382424	0.54387	0.68943	0.756911	0.838601
8.408	0.0264399	0.0491292	0.196038	0.427563	0.740703	0.376344	0.538171	0.683822	0.755393	0.836675
8.559	0.0253669	0.0463651	0.188324	0.421058	0.738085	0.368998	0.534385	0.677865	0.753812	0.832336
8.709	0.0245698	0.0435018	0.183062	0.414747	0.732103	0.3606	0.530559	0.672353	0.74975	0.826532
8.859	0.0234265	0.041585	0.178087	0.4073	0.725803	0.351705	0.52329	0.670543	0.742109	0.825351
9.009	0.0223659	0.0396231	0.17231	0.401639	0.723296	0.345832	0.517208	0.668567	0.738257	0.825578
9.159	0.0216421	0.0377261	0.167283	0.397324	0.72173	0.340839	0.51077	0.662277	0.736194	0.821389
9.309	0.0206072	0.0356291	0.161925	0.390888	0.718407	0.333482	0.506627	0.662198	0.733772	0.81904
9.459	0.0197488	0.0343031	0.156461	0.385876	0.715906	0.328298	0.502579	0.659263	0.729904	0.820208
9.61	0.0190196	0.03294	0.150851	0.381285	0.713919	0.32324	0.49718	0.653448	0.729538	0.814325
9.76	0.0179791	0.0312841	0.145601	0.375322	0.710592	0.316336	0.494502	0.648714	0.727938	0.809841
9.91	0.0174066	0.0295483	0.141008	0.369241	0.706192	0.309075	0.489111	0.643305	0.723593	0.803961
10.06	0.0170961	0.0282435	0.136798	0.362063	0.700422	0.301481	0.483193	0.642534	0.718824	0.803852
10.21	0.0164648	0.0268902	0.132798	0.358065	0.698129	0.296339	0.477229	0.638241	0.714251	0.801691
10.36	0.0161743	0.0261368	0.128249	0.35341	0.697348	0.29054	0.472859	0.634334	0.713971	0.799795
10.51	0.0153436	0.0248423	0.124621	0.348721	0.694364	0.286309	0.469101	0.633562	0.709822	0.800385
10.661	0.0141664	0.0238282	0.120377	0.343828	0.691316	0.281541	0.464781	0.630382	0.705944	0.79883
10.811	0.0141352	0.0227932	0.116029	0.339195	0.689724	0.276426	0.460228	0.623913	0.707159	0.794303
10.961	0.0135845	0.0219929	0.112356	0.334365	0.686191	0.269732	0.458448	0.619612	0.705676	0.78797
11.111	0.0131548	0.0210959	0.108792	0.327979	0.682301	0.263254	0.452642	0.61553	0.699303	0.784235
11.261	0.0125741	0.0202253	0.105991	0.322775	0.677463	0.25708	0.447217	0.613524	0.695723	0.784664
11.411	0.0124064	0.0195206	0.102659	0.319347	0.676293	0.252806	0.441058	0.609359	0.693337	0.782919
11.562	0.0119802	0.0186586	0.100284	0.315216	0.674041	0.248795	0.43666	0.606999	0.692417	0.780714
11.712	0.0112903	0.0183506	0.0968509	0.310415	0.673183	0.243122	0.432962	0.606175	0.688427	0.780463
11.862	0.0108027	0.0177416	0.0935279	0.307583	0.671132	0.239237	0.428253	0.602627	0.685626	0.778482
12.012	0.010291	0.0168526	0.0904149	0.303825	0.669803	0.235626	0.425576	0.597262	0.685628	0.772805
12.162	0.0105066	0.0164282	0.0879864	0.298063	0.665934	0.229348	0.422216	0.592822	0.682146	0.766827
12.312	0.00992359	0.0153012	0.0855743	0.292982	0.660409	0.224733	0.417304	0.589686	0.678523	0.76637
12.462	0.00980073	0.0153722	0.0831692	0.287683	0.656654	0.218771	0.411839	0.58846	0.673788	0.765536
12.613	0.0097092	0.0144622	0.0807818	0.284185	0.655564	0.216338	0.407183	0.584848	0.671469	0.761844
12.763	0.00929122	0.0139519	0.0780917	0.281359	0.653598	0.212324	0.403938	0.582753	0.669529	0.761976
12.913	0.00874508	0.0137829	0.0757426	0.277076	0.651666	0.208719	0.400662	0.581261	0.666097	0.762187
13.063	0.00830534	0.0131534	0.0729254	0.273738	0.650538	0.205172	0.395252	0.576936	0.665422	0.759648
13.213	0.00802486	0.0128494	0.0704722	0.26913	0.648425	0.201491	0.393766	0.57183	0.663482	0.754744
13.363	0.00788353	0.0120424	0.0686395	0.26479	0.643827	0.196695	0.391106	0.56695	0.660482	0.751816
13.513	0.00761856	0.0114608	0.0668701	0.260214	0.63835	0.192098	0.385767	0.565619	0.655948	0.747582
13.664	0.00738144	0.0114593	0.0651869	0.256286	0.635181	0.188536	0.380952	0.563239	0.651247	0.74781
13.814	0.00724296	0.0110423	0.0629957	0.254053	0.635362	0.185659	0.376865	0.559131	0.65184	0.745656
13.964	0.00737157	0.0106885	0.0617015	0.250463	0.634239	0.182194	0.374182	0.558559	0.64838	0.744441
14.114	0.0068269	0.0101677	0.0599445	0.246769	0.631277	0.17813	0.370511	0.556188	0.645	0.744924
14.264	0.00640798	0.00991504	0.0576638	0.244226	0.630554	0.17617	0.36678	0.55076	0.643781	0.740013
14.414	0.00626465	0.00985	0.055627	0.240456	0.628364	0.172415	0.363517	0.546351	0.643812	0.735334
14.564	0.00637056	0.00932521	0.0544354	0.236091	0.623251	0.168907	0.362413	0.541428	0.63931	0.731683
14.715	0.0058253	0.00909271	0.052841	0.232117	0.618639	0.165399	0.357512	0.540372	0.634444	0.732281
14.865	0.00596864	0.00896482	0.0513325	0.229566	0.617173	0.161736	0.353377	0.537677	0.630691	0.731409
15.015	0.00575125	0.00825587	0.0502242	0.226685	0.618092	0.158974	0.35041	0.535675	0.630833	0.727605
15.165	0.00528864	0.00827214	0.0488513	0.222981	0.614966	0.157216	0.34831	0.534713	0.628038	0.727827
15.315	0.00537374	0.00781525	0.0468573	0.22012	0.612927	0.15401	0.344661	0.531143	0.626173	0.727343
15.465	0.00503771	0.00808194	0.0455718	0.21728	0.611938	0.151618	0.340572	0.525841	0.625382	0.723515
15.616	0.00523467	0.0076307	0.0442038	0.213802	0.610031	0.147603	0.338736	0.522519	0.623219	0.719563
15.766	0.00510307	0.00710498	0.0433191	0.210338	0.605514	0.145139	0.334107	0.51922	0.61846	0.716222
15.916	0.00471961	0.00692744	0.0422836	0.206735	0.601148	0.141526	0.330402	0.518481	0.614493	0.716639
16.066	0.00450993	0.00710657	0.0412493	0.204651	0.601432	0.139074	0.326642	0.515821	0.613276	0.714788
16.216	0.00458968	0.00721655	0.0401783	0.201704	0.598627	0.136628	0.323727	0.513672	0.611777	0.714422
16.366	0.00429279	0.00662743	0.0386109	0.199176	0.597953	0.134137	0.32168	0.511998	0.610584	0.713923
16.516	0.00425911	0.00679111	0.0376274	0.197145	0.597431	0.131862	0.31809	0.508218	0.608587	0.711738
16.667	0.00365384	0.00637526	0.0366585	0.193967	0.595535	0.129893	0.316247	0.503644	0.607429	0.70661
16.817	0.00396153	0.00585601	0.0356093	0.190827	0.591793	0.125995	0.313295	0.499899	0.605022	0.702706
16.967	0.00349666	0.0055662	0.0349172	0.187305	0.589422	0.123667	0.310365	0.497611	0.599767	0.70041
17.117	0.00341097	0.00591327	0.033747	0.18512	0.58638	0.12132	0.306555	0.496233	0.597229	0.699742
17.267	0.00356133	0.00583875	0.0329174	0.182917	0.585774	0.11943	0.30288	0.493435	0.595466	0.698457
17.417	0.00346331	0.00531961	0.0324455	0.18079	0.58402	0.118079	0.300828	0.492224	0.594094	0.6964
17.567	0.0033515	0.00502136	0.0315879	0.178085	0.581769	0.114223	0.298613	0.490002	0.591602	0.698132
17.718	0.00303394	0.00516509	0.0307876	0.175876	0.580886	0.113571	0.295017	0.487564	0.591407	0.69605
17.868	0.00276583	0.00526893	0.0293441	0.173597	0.579833	0.112223	0.292649	0.48324	0.591846	0.690189
18.018	0.00272262	0.00472929	0.0285576	0.170414	0.576195	0.109179	0.290986	0.47941	0.587489	0.686892
18.168	0.00257722	0.00462984	0.0283182	0.167209	0.572264	0.107212	0.287011	0.478816	0.583149	0.684972
18.318	0.00314988	0.00472809	0.0271869	0.16507	0.570026	0.104256	0.282809	0.475669	0.577292	0.684114
18.468	0.00315228	0.00435865	0.026431	0.163592	0.570206	0.102969	0.279101	0.473514	0.57715	0.683999
18.619	0.00238512	0.00470102	0.0265476	0.160946	0.568575	0.10166	0.277715	0.471667	0.576171	0.68253
18.769	0.00293426	0.0043901	0.0258483	0.159116	0.567412	0.0985054	0.274545	0.470425	0.574004	0.68185
18.919	0.00237446	0.00389206	0.0245383	0.157107	0.566993	0.0988471	0.272856	0.466551	0.573108	0.679451
19.069	0.00221684	0.00400922	0.0240371	0.154986	0.564244	0.0957825	0.271572	0.461749	0.572032	0.675558
19.219	0.00223289	0.00380324	0.0235658	0.151862	0.560289	0.0935327	0.269594	0.458482	0.568537	0.673197
19.369	0.00206884	0.0038308	0.0229117	0.149313	0.557021	0.0913425	0.265948	0.458138	0.564457	0.67182
19.519	0.00231426	0.00346827	0.0226638	0.14775	0.555155	0.0891291	0.262249	0.456128	0.560686	0.67098
19.67	0.00216906	0.00359162	0.0222347	0.145723	0.55397	0.0884326	0.259859	0.453301	0.559945	0.668232
19.82	0.00195251	0.00335407	0.0217507	0.143995	0.551923	0.0868985	0.25883	0.452482	0.558626	0.668508
19.97	0.00161815	0.00303072	0.0212375	0.142569	0.551076	0.0858619	0.255641	0.450217	0.555891	0.666762
20.12	0.00164644	0.00313483	0.0202188	0.14048	0.550636	0.0851335	0.253045	0.446936	0.555436	0.663826
20.27	0.00115318	0.00291231	0.0194484	0.137838	0.54714	0.0827469	0.252021	0.443744	0.555318	0.660841
20.42	0.00141692	0.00282359	0.0195831	0.135761	0.54354	0.0806414	0.249815	0.440477	0.550328	0.657874
20.57	0.00150138	0.00237662	0.0190162	0.132971	0.539205	0.0793295	0.245631	0.440484	0.548159	0.658355
20.721	0.00131552	0.00248572	0.0182989	0.132271	0.538261	0.0767327	0.243378	0.437213	0.545123	0.656162
20.871	0.00161093	0.00285937	0.0180856	0.130171	0.537458	0.0757647	0.240864	0.436513	0.545068	0.655306
21.021	0.00115966	0.00259274	0.0176782	0.12818	0.535927	0.0752014	0.238627	0.435143	0.543997	0.653684
21.171	0.00101652	0.00252123	0.0170273	0.127158	0.535884	0.0733822	0.235966	0.431786	0.542269	0.65416
21.321	0.00136168	0.00240484	0.0166873	0.125003	0.535541	0.0723526	0.233651	0.429198	0.542883	0.648488
21.471	0.000897931	0.00229771	0.016287	0.122593	0.533386	0.0713381	0.232897	0.424775	0.539936	0.645603
21.622	0.00103611	0.00214757	0.0157703	0.120106	0.529756	0.0693842	0.230448	0.422801	0.534833	0.641732
21.772	0.000956464	0.00230369	0.0158726	0.118585	0.526793	0.0683554	0.227142	0.421071	0.53121	0.641376
21.922	0.000935594	0.00178301	0.0152128	0.117937	0.525168	0.0668695	0.224553	0.419756	0.530411	0.639828
22.072	0.000963093	0.00201409	0.0150717	0.116349	0.524177	0.0657049	0.222745	0.418809	0.529451	0.638881
22.222	0.000700333	0.00169419	0.0147101	0.114812	0.523216	0.0647233	0.220818	0.416216	0.526654	0.63968
22.372	0.000789164	0.00178088	0.0142273	0.113361	0.522775	0.0639916	0.218796	0.41379	0.526002	0.63817
22.522	0.000631144	0.00161314	0.0139218	0.111679	0.52243	0.0633255	0.217539	0.410023	0.526904	0.632024
22.673	0.000909716	0.00164465	0.0135938	0.109598	0.51828	0.0604537	0.215765	0.405824	0.522979	0.62813
22.823	0.00104397	0.00130426	0.0134129	0.107833	0.514648	0.060237	0.212766	0.405856	0.519373	0.629062
22.973	0.000579535	0.00129615	0.0129205	0.106616	0.513239	0.0585164	0.210117	0.403542	0.515869	0.628826
23.123	0.000858991	0.00135347	0.0129521	0.10559	0.512607	0.0577609	0.207217	0.401791	0.516689	0.627192
23.273	0.000411842	0.00115894	0.0126201	0.103457	0.511227	0.0570369	0.206707	0.399913	0.513445	0.626655
23.423	0.000809886	0.00173583	0.0123647	0.102699	0.510247	0.0560663	0.204698	0.398668	0.51298	0.627929
23.573	0.000338971	0.00222582	0.0116857	0.101665	0.509429	0.0561243	0.203339	0.395889	0.512304	0.622591
23.724	0.00043114	0.0025586	0.0113714	0.100036	0.506946	0.0549179	0.201842	0.391769	0.51117	0.617972
23.874	0.000245622	0.00118223	0.0112684	0.098059	0.503811	0.0527598	0.19984	0.389501	0.507342	0.615699
24.024	0.000278817	0.000852464	0.0115778	0.0961636	0.50059	0.0515592	0.19769	0.387768	0.504944	0.616915
24.174	0.000118588	0.00110633	0.0112852	0.0957789	0.500095	0.0497842	0.194861	0.385683	0.501	0.615075
24.324	0.000382085	0.000732296	0.0111491	0.0943239	0.499158	0.0498481	0.192703	0.384538	0.501677	0.613339
24.474	0	0.000823751	0.0107872	0.0927773	0.497599	0.0500062	0.191807	0.382806	0.499256	0.614563
24.625	0.00635107	0.000985071	0.0105648	0.0920831	0.497539	0.048963	0.189629	0.380756	0.498055	0.611482
24.775		0.000767968	0.00976952	0.09028	0.496062	0.0491839	0.188905	0.377638	0.497374	0.606748
24.925		0.000719364	0.00996577	0.0891371	0.493785	0.0475069	0.187281	0.37346	0.496446	0.603929
25.075		0	0.00968755	0.0871073	0.490916	0.046776	0.185644	0.371833	0.493163	0.601762
25.225		0.000256994	0.00958085	0.0862939	0.487295	0.0449598	0.182897	0.3706	0.489568	0.601812
25.375		0.000215623	0.00951045	0.0850105	0.487313	0.0449823	0.180903	0.367883	0.487274	0.600735
25.525		0.000257597	0.00929002	0.0839256	0.486577	0.0434404	0.178809	0.366668	0.487377	0.598886
25.676		0.000570373	0.0088307	0.0830869	0.485478	0.0430967	0.178057	0.366494	0.485629	0.598209
25.826		0.000523906	0.00869426	0.0820051	0.48427	0.041927	0.176413	0.364075	0.484258	0.597506
25.976		4.99741e-05	0.00885271	0.0808692	0.484001	0.0433469	0.174547	0.360702	0.483668	0.593708
26.126		0.000108058	0.00833294	0.0797584	0.481483	0.0410372	0.173726	0.358121	0.481759	0.589888
26.276			0.00812586	0.0779621	0.47877	0.0408842	0.172462	0.355893	0.478121	0.587196
26.426			0.00809563	0.076894	0.476395	0.039661	0.1703	0.354884	0.474164	0.588341
26.576			0.00796845	0.0760809	0.476465	0.0388699	0.167977	0.353039	0.473303	0.585718
26.727			0.0076373	0.0751466	0.475951	0.0387478	0.166839	0.351823	0.472974	0.58467
26.877			0.00762419	0.0743007	0.474327	0.036975	0.165603	0.352201	0.470884	0.585446
27.027			0.00758729	0.0734124	0.474114	0.0377259	0.164419	0.34901	0.469335	0.581744
27.177			0.00706865	0.0724893	0.472363	0.0373088	0.163466	0.34531	0.469177	0.578782
27.327			0.0070364	0.0713381	0.469479	0.0361416	0.162201	0.342742	0.466584	0.57442
27.477			0.00697669	0.0695717	0.466252	0.0350583	0.159463	0.341523	0.463721	0.574159
27.628			0.00688695	0.0686323	0.465792	0.0346519	0.157749	0.340191	0.461193	0.574085
27.778			0.00666929	0.0677724	0.464803	0.0348834	0.155861	0.337654	0.460544	0.571807
27.928			0.00691926	0.0671308	0.463905	0.0337697	0.15518	0.337502	0.459428	0.572101
28.078			0.00627358	0.0661282	0.463196	0.0326746	0.153832	0.336568	0.457455	0.574094
28.228			0.00656699	0.0656289	0.463004	0.0335126	0.15222	0.333213	0.456206	0.568853
28.378			0.00640507	0.0642756	0.460447	0.0334898	0.151442	0.330754	0.456171	0.564266
28.528			0.00605557	0.0632793	0.458053	0.0324464	0.150213	0.327504	0.452885	0.560828
28.679			0.00586131	0.0619169	0.455486	0.0311104	0.148348	0.327327	0.44919	0.561305
28.829			0.0060674	0.061747	0.454582	0.0298984	0.145849	0.326059	0.448105	0.559803
28.979			0.00580932	0.0608966	0.455489	0.0303343	0.14475	0.32367	0.447712	0.558685
29.129			0.00579818	0.0602422	0.454311	0.030217	0.144124	0.323402	0.445424	0.558703
29.279			0.00574901	0.0595427	0.453399	0.0297242	0.142899	0.322354	0.443055	0.557907
29.429			0.00538467	0.0585961	0.452682	0.0292618	0.141374	0.31843	0.443602	0.554669
29.579			0.00520955	0.0575179	0.449949	0.0282741	0.140738	0.316238	0.442179	0.550594
29.73			0.0052753	0.0567578	0.448358	0.0275158	0.139382	0.314582	0.438767	0.547968
29.88			0.00539541	0.0559555	0.445426	0.0270014	0.137812	0.313794	0.436513	0.549218
30.03			0.00466786	0.0554029	0.445858	0.0270327	0.13628	0.312662	0.434969	0.547146
30.18			0.00523844	0.0545566	0.444296	0.0267809	0.134854	0.311645	0.43464	0.546283
30.33			0.00505719	0.0539252	0.443056	0.0259575	0.133814	0.310648	0.432876	0.546572
30.48			0.00453618	0.0535396	0.442205	0.0257533	0.132505	0.308402	0.431706	0.545197
30.63			0.00470808	0.0529015	0.441799	0.0258799	0.132278	0.304676	0.431639	0.542278
30.781			0.00427221	0.0517388	0.438413	0.0253272	0.131447	0.302366	0.429581	0.538574
30.931			0.00457719	0.0507438	0.435356	0.024641	0.129581	0.301091	0.426966	0.53597
31.081			0.00412039	0.0501542	0.43246	0.0229103	0.12836	0.299931	0.423538	0.53587
31.231			0.00403461	0.0496229	0.433253	0.0242074	0.126967	0.299374	0.42382	0.53389
31.381			0.00380868	0.0489966	0.432582	0.0231251	0.125823	0.297953	0.422522	0.534763
31.531			0.00410871	0.048306	0.432002	0.0243532	0.124911	0.296823	0.421366	0.533644
31.682			0.00377831	0.047835	0.430791	0.0226335	0.123704	0.294921	0.420334	0.530887
31.832			0.00369095	0.0468016	0.429513	0.0227274	0.123272	0.292966	0.420141	0.527917
31.982			0.00355639	0.046145	0.426922	0.0221695	0.122589	0.289759	0.418318	0.526099
32.132			0.00353353	0.0452997	0.423874	0.0204856	0.120938	0.28901	0.41547	0.52525
32.282			0.00365201	0.0442902	0.42286	0.0210907	0.119355	0.287358	0.413049	0.523396
32.432			0.0035971	0.0444266	0.422657	0.0209759	0.117809	0.286264	0.413535	0.522926
32.582			0.00324627	0.0437617	0.420979	0.0204172	0.117462	0.285412	0.410274	0.52282
32.733			0.00307555	0.0428622	0.420549	0.0207318	0.116572	0.284789	0.409346	0.521906
32.883			0.00304151	0.0428484	0.419908	0.0205041	0.115726	0.282398	0.409432	0.51877
33.033			0.00309247	0.0418632	0.417743	0.0202717	0.114893	0.279692	0.408735	0.514739
33.183			0.00258501	0.0413389	0.415227	0.0195915	0.113936	0.276927	0.405534	0.513143
33.333			0.00300486	0.0401102	0.41194	0.0192403	0.112372	0.277157	0.402947	0.514066
33.483			0.00285576	0.0397756	0.411283	0.019041	0.1111	0.275542	0.400557	0.51301
33.633			0.00263883	0.0392798	0.410803	0.0188607	0.109967	0.273838	0.400911	0.513118
33.784			0.00261212	0.0389708	0.410901	0.0184824	0.109598	0.274183	0.397581	0.510869
33.934			0.00225965	0.0381418	0.410366	0.0182531	0.108668	0.271771	0.398011	0.510791
34.084			0.00243764	0.0379362	0.409813	0.0177426	0.10807	0.270034	0.397023	0.507992
34.234			0.00226727	0.0371855	0.408193	0.0172676	0.107113	0.267227	0.395735	0.503227
34.384			0.00201008	0.0364294	0.405985	0.0172403	0.106181	0.265813	0.393046	0.501311
34.534			0.00256053	0.0358488	0.403478	0.0165515	0.104849	0.265601	0.390483	0.50079
34.685			0.00252075	0.0357025	0.402562	0.0169633	0.103379	0.263539	0.389154	0.499094
34.835			0.00218278	0.0347447	0.402549	0.0157952	0.102921	0.263179	0.38997	0.499419
34.985			0.00237398	0.0343822	0.401692	0.0160406	0.102412	0.262063	0.38799	0.499922
35.135			0.00210214	0.0346862	0.400212	0.0159154	0.101052	0.260501	0.387629	0.498307
35.285			0.00172989	0.034159	0.400337	0.0156571	0.100443	0.258523	0.387921	0.493779
35.435			0.0018127	0.0338291	0.397326	0.0153333	0.100084	0.255868	0.386594	0.490307
35.585			0.00176095	0.0328317	0.395338	0.015718	0.099208	0.254826	0.383201	0.489682
35.736			0.00176645	0.0322525	0.393608	0.0145415	0.0979652	0.254935	0.380174	0.490882
35.886			0.00171243	0.03194	0.393679	0.0144052	0.0970913	0.253124	0.379558	0.490727
36.036			0.00150911	0.0315201	0.392209	0.014192	0.0965116	0.252415	0.378016	0.489149
36.186			0.00158168	0.0309336	0.39194	0.0134442	0.0952772	0.251629	0.377534	0.488493
36.336			0.00173582	0.0307898	0.391015	0.0146229	0.0950441	0.249952	0.376859	0.487714
36.486			0.00126463	0.0301962	0.389664	0.0142444	0.0943473	0.247688	0.377444	0.484744
36.636			0.00117504	0.0298516	0.388115	0.0138335	0.0933953	0.245876	0.3754	0.480046
36.787			0.00153864	0.0292598	0.384813	0.0127502	0.092287	0.245258	0.372075	0.480834
36.937			0.00102332	0.0287598	0.384458	0.0124992	0.0914945	0.244165	0.369723	0.480866
37.087			0.00113878	0.0284877	0.383782	0.0124571	0.0903584	0.242174	0.370569	0.479093
37.237			0.0012251	0.0282827	0.383113	0.0129738	0.0898966	0.241722	0.369236	0.478249
37.387			0.00125231	0.0275983	0.381629	0.0123825	0.0891346	0.241041	0.36764	0.478418
37.537			0.00106393	0.0278135	0.381757	0.0123022	0.0885838	0.238853	0.367857	0.476768
37.688			0.000978105	0.0271414	0.380323	0.0117361	0.0884326	0.237153	0.366563	0.473276
37.838			0.00115941	0.0266614	0.377882	0.012112	0.087545	0.235474	0.364128	0.46901
37.988			0.000768603	0.0258884	0.375166	0.0111692	0.0864374	0.235176	0.362251	0.470081
38.138			0.000890841	0.0260515	0.374314	0.011186	0.0852972	0.233274	0.360124	0.469985
38.288			0.00109426	0.0257607	0.374971	0.0109904	0.0846435	0.232442	0.359409	0.468873
38.438			0.000968458	0.0253692	0.373699	0.0105321	0.0840019	0.231581	0.358438	0.468712
38.588			0.000767514	0.0249653	0.373081	0.0110908	0.0833807	0.230395	0.356997	0.468436
38.739			0.000685495	0.0246616	0.372759	0.0120638	0.0826699	0.228116	0.356633	0.465285
38.889			0.000631227	0.0241282	0.370351	0.0111288	0.0824047	0.226991	0.354582	0.462405
39.039			0.00055079	0.023575	0.367622	0.010623	0.0818571	0.225242	0.352171	0.460591
39.189			0.000598429	0.0232947	0.365698	0.0101492	0.0807035	0.224523	0.350169	0.461181
39.339			0.000542677	0.0233962	0.365249	0.0103299	0.0798361	0.224839	0.349231	0.460534
39.489			0.000174181	0.022664	0.364805	0.00977268	0.0793287	0.221619	0.34955	0.460328
39.639			0.000351825	0.0229021	0.363188	0.00942204	0.0785521	0.221639	0.347784	0.460717
39.79			4.20488e-05	0.0225841	0.363143	0.00931107	0.0785502	0.220029	0.347587	0.458929
39.94			0.000501568	0.0221513	0.36163	0.0100697	0.0778279	0.217901	0.347381	0.456785
40.09			0.000130698	0.0217898	0.359857	0.00936888	0.0774078	0.216541	0.345795	0.453296
40.24			0.000125404	0.0211038	0.35776	0.00883605	0.0767113	0.215415	0.343095	0.452283
40.39			0	0.0211335	0.355939	0.00863614	0.0759763	0.214875	0.340633	0.450987
40.54				0.0205433	0.356337	0.00847315	0.0751869	0.214326	0.339495	0.450545
40.691				0.0201423	0.355426	0.00893226	0.0743872	0.213447	0.339488	0.448886
40.841				0.0202215	0.354428	0.00828494	0.0741117	0.213568	0.338588	0.449933
40.991				0.0205291	0.354734	0.00771735	0.0735561	0.210959	0.33864	0.44824
41.141				0.0196364	0.354388	0.00885389	0.0733163	0.208554	0.338789	0.446114
41.291				0.0191058	0.35138	0.00799813	0.0730626	0.207785	0.335465	0.443325
41.441				0.0186308	0.349666	0.00816817	0.0721488	0.207203	0.332884	0.44381
41.591				0.0185234	0.348742	0.00684376	0.0707898	0.205496	0.331171	0.442641
41.742				0.0183578	0.348006	0.00797144	0.070278	0.204607	0.330858	0.441476
41.892				0.0181763	0.346392	0.00796417	0.0698885	0.204506	0.329687	0.441427
42.042				0.0177106	0.34626	0.00748086	0.0698998	0.203335	0.327663	0.440453
42.192				0.0180642	0.345958	0.00795111	0.069415	0.201213	0.328148	0.438456
42.342				0.0174403	0.344422	0.00739477	0.068914	0.199795	0.327732	0.434688
42.492				0.0171379	0.34242	0.00721678	0.0684656	0.198383	0.325569	0.43203
42.642				0.016802	0.34062	0.00624085	0.0672573	0.198831	0.323135	0.432399
42.793				0.0171049	0.339361	0.0070874	0.066537	0.197002	0.321566	0.431708
42.943				0.0170447	0.339826	0.0071877	0.0659977	0.195673	0.32241	0.43078
43.093				0.0161828	0.338526	0.00676493	0.0658332	0.195899	0.321076	0.430387
43.243				0.0161821	0.337309	0.00691771	0.0649516	0.194678	0.320118	0.429681
43.393				0.016012	0.337968	0.0073098	0.0645009	0.193046	0.320302	0.427622
43.543				0.0153418	0.336106	0.00604957	0.0646332	0.191222	0.319597	0.425324
43.693				0.0151513	0.333835	0.00622801	0.0644344	0.190194	0.316855	0.423179
43.844				0.0150344	0.330583	0.00559966	0.0632625	0.189093	0.314238	0.422253
43.994				0.0147975	0.329856	0.00626754	0.062484	0.188594	0.314103	0.421055
44.144				0.0146425	0.330906	0.00555979	0.0620053	0.187232	0.312828	0.420499
44.294				0.0143132	0.32916	0.0061928	0.0613849	0.187156	0.312054	0.420888
44.444				0.0143462	0.328662	0.00592622	0.0614119	0.186458	0.311124	0.418746
44.594				0.0141655	0.328105	0.006013	0.061184	0.184746	0.311516	0.417689
44.745				0.0135748	0.32575	0.00544223	0.0608896	0.183024	0.310048	0.412704
44.895				0.0132912	0.323919	0.00465894	0.0598997	0.182591	0.308436	0.412271
45.045				0.0129953	0.323037	0.00489179	0.0590761	0.181587	0.306224	0.411919
45.195				0.0130873	0.323391	0.00531456	0.0582705	0.17994	0.305251	0.410156
45.345				0.0125088	0.32237	0.00569144	0.0583795	0.179892	0.304201	0.409351
45.495				0.0124824	0.323058	0.00467723	0.0580774	0.179609	0.30334	0.411141
45.645				0.0127302	0.322161	0.00561068	0.0574488	0.177948	0.302693	0.409281
45.796				0.0125939	0.321242	0.00543621	0.0569077	0.176758	0.302763	0.405139
45.946				0.0121342	0.318165	0.00510193	0.0567497	0.174933	0.300915	0.403984
46.096				0.0114789	0.317094	0.00370721	0.0560515	0.175187	0.298903	0.40273
46.246				0.0113966	0.315627	0.00411759	0.0556185	0.174089	0.296981	0.402436
46.396				0.0115556	0.316022	0.0048392	0.0549671	0.172798	0.296886	0.40079
46.546				0.0113577	0.314181	0.00446835	0.055084	0.172832	0.295368	0.399904
46.696				0.0112978	0.313213	0.00430092	0.0545075	0.172048	0.294757	0.400191
46.847				0.0113247	0.312926	0.00428456	0.0541116	0.170803	0.29489	0.397247
46.997				0.0108387	0.311869	0.00346118	0.053954	0.169358	0.294376	0.395028
47.147				0.0102867	0.310299	0.00371187	0.0534904	0.167615	0.292307	0.39368
47.297				0.0103754	0.30771	0.00338428	0.0530245	0.16778	0.290486	0.393146
47.447				0.010473	0.306656	0.0038936	0.052589	0.166623	0.28896	0.392511
47.597				0.00996022	0.30711	0.0029722	0.0521616	0.1653	0.288961	0.391776
47.748				0.0101749	0.306477	0.00325911	0.0519138	0.165496	0.288454	0.391895
47.898				0.00989018	0.305979	0.00338928	0.0515033	0.164286	0.287343	0.390581
48.048				0.00976949	0.306515	0.00368767	0.0510575	0.162794	0.288016	0.388088
48.198				0.00990099	0.303976	0.00338213	0.0509241	0.161693	0.287104	0.384699
48.348				0.00918636	0.301039	0.00305012	0.0505543	0.161289	0.284727	0.383611
48.498				0.00901567	0.299215	0.0024597	0.0497566	0.160688	0.283067	0.384314
48.648				0.00924191	0.299145	0.00292426	0.0491261	0.159599	0.282039	0.381943
48.799				0.00879573	0.299545	0.00287428	0.0488977	0.158486	0.282146	0.380842
48.949				0.00896592	0.297659	0.0032431	0.0488452	0.158281	0.281245	0.381488
49.099				0.00892832	0.298374	0.00223468	0.0486855	0.158056	0.280634	0.380702
49.249				0.00883968	0.298976	0.00239177	0.0489126	0.155758	0.280721	0.378347
49.399				0.0082922	0.296	0.0032849	0.0483249	0.154483	0.279667	0.374745
49.549				0.00807569	0.29515	0.00242108	0.0476823	0.154162	0.277694	0.37426
49.699				0.0082301	0.292279	0.00157873	0.0471343	0.153274	0.27533	0.37425
49.85				0.00767821	0.292373	0.00195038	0.0464302	0.153066	0.275313	0.373572
50				0.00784384	0.29105	0.0018109	0.0464765	0.152429	0.27447	0.372388
50.15				0.00778541	0.290434	0.00184849	0.0461172	0.152506	0.273366	0.371877
50.3				0.00801978	0.289994	0.00214132	0.0457892	0.151572	0.273515	0.370498
50.45				0.00761254	0.288508	0.00264371	0.0456973	0.149356	0.273138	0.368007
50.6				0.00748818	0.287659	0.00169447	0.0454894	0.148332	0.271694	0.365937
50.751				0.00695554	0.285874	0.00112825	0.0450839	0.147973	0.269155	0.366231
50.901				0.00673768	0.284613	0.00157543	0.0446095	0.147393	0.268268	0.365125
51.051				0.00694468	0.283983	0.000724336	0.0442928	0.146513	0.267474	0.363876
51.201				0.0070167	0.28453	0.0014556	0.0439011	0.146557	0.266672	0.363362
51.351				0.00678128	0.283583	0.00189086	0.0435499	0.145454	0.266229	0.363865
51.501				0.00664016	0.28367	0.0013737	0.0433661	0.144243	0.265801	0.361468
51.651				0.00666849	0.282603	0.00178341	0.0431699	0.142357	0.266082	0.359375
51.802				0.00631278	0.280855	0.00095605	0.0429328	0.141864	0.26364	0.357288
51.952				0.0059785	0.279374	0.000778289	0.0423056	0.141475	0.262327	0.357213
52.102				0.00655569	0.278546	0.00134792	0.0417827	0.140682	0.260581	0.357282
52.252				0.00604681	0.27779	0.000814636	0.0416666	0.140108	0.261089	0.355595
52.402				0.00571585	0.277817	0.0014088	0.0413144	0.140078	0.259658	0.35569
52.552				0.00614715	0.277806	0.00108713	0.04124	0.139197	0.259139	0.354188
52.702				0.00602622	0.277628	0.00135019	0.041227	0.137826	0.25914	0.351936
52.853				0.00539973	0.276261	0.00047581	0.0407486	0.136195	0.258299	0.350887
53.003				0.00572195	0.274396	0.000262042	0.0406999	0.135401	0.255721	0.349387
53.153				0.00556347	0.271084	4.21403e-05	0.0399566	0.135905	0.253832	0.349663
53.303				0.00525608	0.272084	0.000186167	0.0395995	0.13518	0.253116	0.349096
53.453				0.00528356	0.271088	0.000214109	0.0392878	0.134417	0.253195	0.3473
53.603				0.00510583	0.270474	0	0.0391078	0.134171	0.251441	0.347236
53.754				0.00526863	0.270049	--	0.0390538	0.133048	0.252023	0.346755
53.904				0.00507403	0.270596	--	0.0387499	0.131503	0.251815	0.343386
54.054				0.00462478	0.268942	--	0.0384893	0.131089	0.249893	0.341847
54.204				0.00442135	0.267507	--	0.0382771	0.130244	0.24778	0.341391
54.354				0.00460092	0.264978	--	0.0384514	0.129519	0.246043	0.34005
54.504				0.0043345	0.265873	--	0.0375076	0.12893	0.246454	0.34038
54.654				0.00425503	0.265484	--	0.037506	0.128574	0.245977	0.338722
54.805				0.00454224	0.26521	--	0.0376785	0.128346	0.244392	0.338364
54.955				0.00443033	0.26505	--	0.0369304	0.126997	0.244664	0.337478
55.105				0.00432021	0.262935	--	0.036793	0.125905	0.244254	0.335435
55.255				0.00385696	0.261613	--	0.036648	0.124942	0.242804	0.332352
55.405				0.00377735	0.259335	--	0.0362242	0.125092	0.241024	0.332752
55.555				0.00370984	0.258512	--	0.0358321	0.124624	0.239923	0.331857
55.705				0.00336926	0.258942	--	0.0356911	0.124064	0.240109	0.33151
55.856				0.00354555	0.25802	--	0.0353235	0.123805	0.238741	0.331472
56.006				0.00370339	0.257685	--	0.0352644	0.123645	0.23845	0.331289
56.156				0.00382705	0.257834	--	0.0350322	0.122723	0.237841	0.33006
56.306				0.0035518	0.256697	--	0.0352087	0.121543	0.237412	0.327358
56.456				0.00302903	0.254814	--	0.0349378	0.12009	0.235999	0.324636
56.606				0.00300289	0.253605	--	0.0344056	0.120487	0.234346	0.325551
56.756				0.0029581	0.25277	--	0.0338437	0.119697	0.23275	0.324713
56.907				0.00291936	0.252675	--	0.0338041	0.119215	0.233482	0.323327
57.057				0.00285994	0.251622	--	0.0334559	0.118518	0.23212	0.323303
57.207				0.00282774	0.251473	--	0.0331553	0.117941	0.231466	0.322829
57.357				0.00280205	0.251668	--	0.0333141	0.117258	0.231274	0.320895
57.507				0.00266976	0.250284	--	0.032838	0.116541	0.230519	0.319079
57.657				0.00259163	0.248195	--	0.0326301	0.11601	0.228438	0.317197
57.808				0.00242794	0.246722	--	0.0324878	0.115458	0.226589	0.317822
57.958				0.00263712	0.246452	--	0.032026	0.114446	0.226075	0.315945
58.108				0.00288042	0.246521	--	0.0321704	0.113774	0.226272	0.316177
58.258				0.00250775	0.24586	--	0.0317691	0.113907	0.22498	0.316263
58.408				0.00250091	0.245867	--	0.0316173	0.113391	0.224747	0.314993
58.558				0.00227576	0.245618	--	0.0313466	0.111695	0.224226	0.31295
58.708				0.00225993	0.243994	--	0.0319623	0.111052	0.223412	0.311486
58.859				0.00203339	0.242719	--	0.0314152	0.110419	0.221685	0.311038
59.009				0.00187655	0.240987	--	0.0309845	0.110163	0.219938	0.3105
59.159				0.00202675	0.241889	--	0.0307591	0.109374	0.219842	0.308692
59.309				0.00210214	0.24135	--	0.0309226	0.109176	0.219742	0.309488
59.459				0.00199877	0.240373	--	0.030464	0.10895	0.218767	0.308989
59.609				0.00205953	0.240116	--	0.0302765	0.107477	0.218651	0.30772
59.759				0.00156633	0.239385	--	0.0305458	0.106614	0.218183	0.305715
59.91				0.00143389	0.23781	--	0.0297675	0.106104	0.216646	0.302703
60.06				0.00121642	0.236849	--	0.0295438	0.105708	0.214404	0.302871
60.21				0.00113379	0.236199	--	0.0296392	0.105468	0.213424	0.302885
60.36				0.00113547	0.235619	--	0.0289257	0.104727	0.213626	0.302444
60.51				0.00184272	0.234947	--	0.0290716	0.104524	0.212855	0.301621
60.66				0.00156866	0.23453	--	0.0292314	0.104309	0.212269	0.30252
60.811				0.00115273	0.234505	--	0.0289449	0.102869	0.211927	0.299853
60.961				0.00121757	0.234033	--	0.0288433	0.102514	0.211541	0.297116
61.111				0.000909231	0.232256	--	0.0289767	0.101318	0.210127	0.296368
61.261				0.000860074	0.230275	--	0.0284165	0.101661	0.208635	0.295952
61.411				0.00111201	0.229665	--	0.0280219	0.101098	0.207618	0.295088
61.561				0.000832941	0.230197	--	0.0279394	0.0998721	0.206926	0.294256
61.711				0.00074797	0.230503	--	0.0277695	0.100566	0.206014	0.294769
61.862				0.000828228	0.230121	--	0.02778	0.099548	0.205377	0.293814
62.012				0.00105308	0.22956	--	0.0276862	0.0986825	0.205743	0.291992
62.162				0.000758337	0.2286	--	0.0275261	0.0978181	0.204512	0.290681
62.312				0.000397125	0.228401	--	0.0278055	0.0971319	0.203337	0.288529
62.462				0.000167015	0.226838	--	0.0272915	0.0970829	0.20239	0.289067
62.612				5.00499e-05	0.226953	--	0.0268753	0.0968719	0.202131	0.288616
62.762				0.00044534	0.226539	--	0.0267431	0.096321	0.200882	0.288495
62.913				0.000428028	0.225726	--	0.0264854	0.0960469	0.199582	0.288732
63.063				0.000381698	0.225503	--	0.0263245	0.0955549	0.199077	0.28744
63.213				0.000444	0.22445	--	0.026514	0.0945866	0.199393	0.284936
63.363				0	0.223774	--	0.0262364	0.0938824	0.198812	0.283079
63.513					0.223138	--	0.0259906	0.0933266	0.196831	0.282964
63.663					0.221814	--	0.0258042	0.0927439	0.195804	0.282943
63.814					0.222918	--	0.025085	0.0921339	0.195567	0.281728
63.964					0.222082	--	0.0254121	0.0922046	0.195581	0.280958
64.114					0.221674	--	0.0254965	0.0920616	0.195145	0.281329
64.264					0.220871	--	0.0248924	0.0908805	0.195411	0.280152
64.414					0.220725	--	0.0253671	0.0903451	0.194921	0.278692
64.564					0.219179	--	0.0248867	0.0893403	0.19347	0.276458
64.714					0.217642	--	0.0246952	0.0896016	0.191893	0.276095
64.865					0.216995	--	0.0241715	0.0889877	0.190728	0.276826
65.015					0.217306	--	0.0240996	0.088052	0.190528	0.275004
65.165					0.215969	--	0.0240975	0.0879804	0.189707	0.275435
65.315					0.21682	--	0.0242612	0.0881026	0.189175	0.275828
65.465					0.216599	--	0.023892	0.0870309	0.188957	0.273388
65.615					0.215449	--	0.0240686	0.0862655	0.18914	0.271864
65.765					0.214788	--	0.0237589	0.0858187	0.187714	0.27048
65.916					0.213428	--	0.0235291	0.0859696	0.185838	0.271207
66.066					0.212602	--	0.0233483	0.0851169	0.184804	0.270138
66.216					0.212847	--	0.0228722	0.0850289	0.18472	0.270056
66.366					0.212488	--	0.0232545	0.0847055	0.183859	0.26959
66.516					0.212486	--	0.0229132	0.0842874	0.183469	0.269058
66.666					0.211932	--	0.0228008	0.0835411	0.183757	0.267472
66.817					0.211006	--	0.0226418	0.0829374	0.183167	0.265837
66.967					0.209887	--	0.0227593	0.0825376	0.181566	0.265516
67.117					0.208577	--	0.0222777	0.0823187	0.180487	0.26516
67.267					0.208538	--	0.0224925	0.0817436	0.179511	0.265091
67.417					0.208404	--	0.0225119	0.0815645	0.179425	0.263873
67.567					0.207541	--	0.0221538	0.0814722	0.178639	0.264333
67.717					0.207261	--	0.0221869	0.0809277	0.177901	0.263675
67.868					0.206649	--	0.0221165	0.0798489	0.177778	0.261779
68.018					0.206624	--	0.0220137	0.0791379	0.176669	0.259611
68.168					0.205252	--	0.0216603	0.0791708	0.175116	0.259367
68.318					0.204136	--	0.0213735	0.078993	0.174008	0.260266
68.468					0.204313	--	0.021122	0.0784401	0.173814	0.258639
68.618					0.204045	--	0.0209572	0.0781577	0.173883	0.25868
68.768					0.203701	--	0.0215551	0.0781142	0.172582	0.25822
68.919					0.203615	--	0.0210719	0.0768315	0.172907	0.257355
69.069					0.202871	--	0.0207846	0.0761162	0.172921	0.255271
69.219					0.201893	--	0.0209728	0.0756531	0.171574	0.253842
69.369					0.200387	--	0.0211499	0.0751051	0.170889	0.253899
69.519					0.200093	--	0.0203345	0.0748276	0.16922	0.254072
69.669					0.200102	--	0.0203598	0.0743183	0.16908	0.253304
69.82					0.200036	--	0.0205582	0.0742637	0.168144	0.253646
69.97					0.199601	--	0.0200785	0.0740466	0.167997	0.253047
70.12					0.199849	--	0.0203205	0.0732179	0.168273	0.252235
70.27					0.198333	--	0.0203346	0.0729671	0.168435	0.250512
70.42					0.197387	--	0.0203104	0.0723575	0.166521	0.249181
70.57					0.196394	--	0.0199338	0.0721167	0.165107	0.25018
70.72					0.196265	--	0.0194338	0.0719981	0.164	0.249247
70.871					0.195702	--	0.0195894	0.0716852	0.163886	0.248462
71.021					0.195671	--	0.0195662	0.0717436	0.16337	0.248662
71.171					0.195754	--	0.0196217	0.0716524	0.162575	0.248936
71.321					0.196066	--	0.0194909	0.0703262	0.162688	0.247124
71.471					0.194162	--	0.0195217	0.0693294	0.162289	0.244863
71.621					0.192778	--	0.019264	0.0692629	0.160949	0.244181
71.771					0.191424	--	0.0189342	0.0691765	0.159374	0.244537
71.922					0.192077	--	0.0190605	0.0685817	0.159118	0.244095
72.072					0.191261	--	0.0187604	0.068407	0.158806	0.243443
72.222					0.191226	--	0.0190697	0.0688634	0.158735	0.243832
72.372					0.191276	--	0.0187683	0.0678323	0.157908	0.24259
72.522					0.190751	--	0.0185943	0.0670308	0.158086	0.240917
72.672					0.189915	--	0.0185145	0.0664273	0.156884	0.239682
72.822					0.188091	--	0.0183774	0.066298	0.155842	0.239368
72.973					0.187287	--	0.0181969	0.0662179	0.155025	0.238947
73.123					0.187701	--	0.018016	0.0661115	0.154715	0.238094
73.273					0.187134	--	0.018383	0.0661361	0.154304	0.238421
73.423					0.18735	--	0.0178759	0.0654724	0.153539	0.238651
73.573					0.187185	--	0.0179669	0.0647591	0.15333	0.236941
73.723					0.186428	--	0.0177106	0.0646495	0.153354	0.235586
73.874					0.185206	--	0.0179636	0.0640387	0.152484	0.234314
74.024					0.184243	--	0.0175723	0.0637211	0.150951	0.233861
74.174					0.18368	--	0.017697	0.0634511	0.150204	0.23411
74.324					0.184477	--	0.0175362	0.0632852	0.150021	0.233156
74.474					0.183223	--	0.0173098	0.0632984	0.149451	0.233577
74.624					0.183394	--	0.0175051	0.0629169	0.148679	0.233683
74.774					0.183367	--	0.0173229	0.0626094	0.148732	0.232504
74.925					0.182877	--	0.017249	0.0618642	0.148654	0.230879
75.075					0.18102	--	0.0174165	0.0613742	0.147099	0.230098
75.225					0.180119	--	0.0170205	0.0610866	0.145955	0.229937
75.375					0.180205	--	0.0165713	0.0613932	0.145246	0.230182
75.525					0.180042	--	0.0168447	0.0608035	0.145083	0.22885
75.675					0.180171	--	0.0166019	0.0604173	0.144489	0.230209
75.825					0.179702	--	0.0164873	0.0604858	0.144347	0.229631
75.976					0.178965	--	0.0166154	0.0594142	0.145049	0.227781
76.126					0.178101	--	0.0169405	0.0589014	0.143219	0.226379
76.276					0.17718	--	0.0166316	0.0585421	0.141573	0.22576
76.426					0.176152	--	0.0162118	0.0588926	0.140884	0.22659
76.576					0.176305	--	0.0162315	0.0584714	0.140211	0.225647
76.726					0.175682	--	0.0162852	0.0584875	0.139787	0.225157
76.877					0.175742	--	0.0165084	0.0580008	0.139169	0.225773
77.027					0.175098	--	0.016192	0.0576758	0.138722	0.224895
77.177					0.174605	--	0.0160303	0.0571844	0.139448	0.223007
77.327					0.174083	--	0.0163688	0.0564383	0.138907	0.221877
77.477					0.172495	--	0.015606	0.0564862	0.137539	0.221843
77.627					0.171844	--	0.0155786	0.0561337	0.136168	0.221891
77.777					0.172055	--	0.0151455	0.0557946	0.136258	0.220794
77.928					0.171624	--	0.0156584	0.0555335	0.13591	0.220214
78.078					0.171061	--	0.0154406	0.0557807	0.135306	0.220916
78.228					0.171317	--	0.0153808	0.0550591	0.135351	0.219092
78.378					0.171222	--	0.0151999	0.0544086	0.13633	0.218258
78.528					0.170585	--	0.0156517	0.0537226	0.135012	0.217552
78.678					0.168608	--	0.0149805	0.0541142	0.13408	0.21716
78.828					0.168302	--	0.0146871	0.053702	0.132875	0.217587
78.979					0.168527	--	0.0149448	0.0535071	0.132753	0.216812
79.129					0.168137	--	0.0150222	0.0533492	0.132316	0.216508
79.279					0.167581	--	0.0152596	0.0531873	0.132173	0.216478
79.429					0.167338	--	0.0146227	0.0527456	0.132428	0.21492
79.579					0.166751	--	0.0150039	0.0520852	0.131711	0.213278
79.729					0.16601	--	0.0149432	0.0512984	0.130408	0.213581
79.88					0.164176	--	0.0147345	0.0517166	0.129281	0.213217
80.03					0.163849	--	0.0145893	0.0516285	0.128952	0.212473
80.18					0.16422	--	0.0144335	0.0508667	0.128804	0.211665
80.33					0.164255	--	0.0146369	0.0511437	0.128045	0.21264
80.48					0.163789	--	0.0147486	0.050865	0.127768	0.212528
80.63					0.16423	--	0.014486	0.0502433	0.127993	0.210918
80.78					0.162785	--	0.0147026	0.0493581	0.127495	0.209025
80.931					0.161261	--	0.0143256	0.0494834	0.125931	0.208085
81.081					0.160834	--	0.0142728	0.049389	0.125073	0.208472
81.231					0.161357	--	0.0140047	0.049153	0.124578	0.208509
81.381					0.160827	--	0.0140291	0.0489739	0.12456	0.207825
81.531					0.160536	--	0.0134739	0.0489003	0.123905	0.20811
81.681					0.160527	--	0.0138229	0.0489748	0.124043	0.20642
81.831					0.159707	--	0.0138351	0.0482676	0.124339	0.205712
81.982					0.159044	--	0.0142787	0.047734	0.123152	0.204705
82.132					0.158205	--	0.0142385	0.0471899	0.12225	0.204152
82.282					0.157495	--	0.013673	0.0476048	0.121844	0.204623
82.432					0.157645	--	0.0137823	0.0472601	0.121417	0.203187
82.582					0.15809	--	0.0137139	0.0471906	0.121359	0.203498
82.732					0.157258	--	0.0135967	0.0467207	0.120515	0.203491
82.883					0.157518	--	0.0133549	0.0463222	0.12022	0.202754
83.033					0.156962	--	0.0135204	0.0460209	0.120561	0.201823
83.183					0.155414	--	0.0135864	0.0460725	0.119577	0.200153
83.333					0.153941	--	0.0137562	0.04575	0.118489	0.199638
83.483					0.154029	--	0.0131132	0.0454106	0.117867	0.199613
83.633					0.154163	--	0.0132356	0.0456701	0.118071	0.198432
83.783					0.153348	--	0.0135141	0.0449396	0.117606	0.19918
83.934					0.154108	--	0.0133269	0.0446495	0.117137	0.199331
84.084					0.15417	--	0.0132192	0.0443723	0.117147	0.198075
84.234					0.153244	--	0.0131975	0.0441456	0.117343	0.19703
84.384					0.152149	--	0.0129522	0.0432669	0.11577	0.196327
84.534					0.150882	--	0.0129461	0.0436675	0.115304	0.196892
84.684					0.15112	--	0.0126568	0.0435863	0.114203	0.195725
84.834					0.151529	--	0.0124885	0.0435298	0.114502	0.195211
84.985					0.151256	--	0.0130045	0.0428139	0.11425	0.19542
85.135					0.150922	--	0.0128944	0.0429131	0.114196	0.195171
85.285					0.151217	--	0.0127129	0.0425776	0.114129	0.194169
85.435					0.150388	--	0.0128204	0.0419615	0.11364	0.193153
85.585					0.149414	--	0.0126641	0.0418558	0.112431	0.192711
85.735					0.148627	--	0.01263	0.0419936	0.111479	0.19223
85.885					0.148632	--	0.0123539	0.042003	0.111251	0.192101
86.036					0.148581	--	0.0123795	0.0416713	0.111176	0.191721
86.186					0.14816	--	0.0119455	0.0421544	0.110946	0.191463
86.336					0.147728	--	0.0123631	0.0412502	0.110502	0.190763
86.486					0.148418	--	0.012246	0.041135	0.110494	0.189314
86.636					0.147107	--	0.012397	0.0409596	0.10969	0.187719
86.786					0.145509	--	0.012241	0.0405614	0.108427	0.187396
86.937					0.145139	--	0.0119053	0.0407018	0.107728	0.187908
87.087					0.14584	--	0.012379	0.0401316	0.107729	0.187473
87.237					0.145237	--	0.0121169	0.040486	0.107841	0.187028
87.387					0.144843	--	0.0119075	0.0405426	0.106868	0.187167
87.537					0.145023	--	0.0121684	0.0399718	0.106754	0.186558
87.687					0.144679	--	0.0119401	0.0395894	0.107056	0.184924
87.837					0.143242	--	0.0122293	0.0390319	0.106014	0.184323
87.988					0.142455	--	0.0120411	0.0389685	0.105036	0.184082
88.138					0.141956	--	0.0116755	0.0389676	0.104483	0.184026
88.288					0.142588	--	0.0115515	0.0388407	0.104585	0.183143
88.438					0.142354	--	0.0118881	0.0385006	0.104114	0.182919
88.588					0.142007	--	0.0115405	0.0384504	0.103514	0.182414
88.738					0.142193	--	0.0119031	0.0379415	0.10406	0.181665
88.888					0.141519	--	0.0122105	0.0371982	0.10332	0.180407
89.039					0.140975	--	0.0117197	0.0372703	0.102614	0.178984
89.189					0.139464	--	0.0116853	0.0372319	0.101684	0.179299
89.339					0.139204	--	0.0115607	0.037014	0.101418	0.178646
89.489					0.139165	--	0.0116504	0.036916	0.101348	0.178881
89.639					0.138657	--	0.0113052	0.0369437	0.10078	0.179508
89.789					0.13877	--	0.0110913	0.0372117	0.10055	0.178932
89.94					0.138752	--	0.0111847	0.0365403	0.100811	0.177266
90.09					0.137362	--	0.0111521	0.0358607	0.100138	0.176089
90.24					0.137	--	0.0111715	0.0357319	0.0992061	0.175421
90.39					0.136271	--	0.0111432	0.0357266	0.0986175	0.176034
90.54					0.136182	--	0.0109173	0.0353204	0.0981986	0.17519
90.69					0.136207	--	0.0106504	0.0352642	0.0979609	0.175092
90.84					0.135587	--	0.0107526	0.0357795	0.097919	0.175321
90.991					0.135839	--	0.0109655	0.0353804	0.0977599	0.174104
91.141					0.13538	--	0.0110688	0.034508	0.0979516	0.172624
91.291					0.135042	--	0.011078	0.0342619	0.0974811	0.172199
91.441					0.134228	--	0.0109125	0.0344417	0.0965756	0.171304
91.591					0.133088	--	0.0112176	0.0342478	0.0955022	0.171634
91.741					0.132778	--	0.0101687	0.0340282	0.0958918	0.170934
91.891					0.132783	--	0.0103346	0.0341227	0.095469	0.170719
92.042					0.132766	--	0.010433	0.033619	0.0948304	0.170618
92.192					0.132961	--	0.0105264	0.0339293	0.0948644	0.17005
92.342					0.132345	--	0.0105879	0.0336184	0.0947643	0.168557
92.492					0.131099	--	0.0106833	0.033035	0.0937762	0.16827
92.642					0.1308	--	0.0103145	0.0328977	0.0931619	0.168083
92.792					0.130251	--	0.010309	0.0329226	0.0923371	0.168203
92.943					0.130364	--	0.00988887	0.0328313	0.0927627	0.167318
93.093					0.130323	--	0.0103808	0.0328007	0.092375	0.167863
93.243					0.1301	--	0.01009	0.0324413	0.092069	0.166976
93.393					0.12967	--	0.0100783	0.0321943	0.0918581	0.165965
93.543					0.128839	--	0.0102015	0.0318564	0.0915746	0.164326
93.693					0.12811	--	0.0101784	0.0312398	0.0907977	0.163854
93.843					0.127869	--	0.00992895	0.0316255	0.0902728	0.164194
93.994					0.127868	--	0.00967861	0.0312585	0.0896648	0.163641
94.144					0.128077	--	0.0102252	0.0312261	0.0896539	0.163618
94.294					0.127438	--	0.0101758	0.0311608	0.0889311	0.163933
94.444					0.12687	--	0.00972794	0.0309497	0.0889135	0.163482
94.594					0.127219	--	0.00970095	0.0303925	0.088705	0.162108
94.744					0.126257	--	0.00993577	0.0302835	0.0881579	0.161473
94.894					0.12504	--	0.0102343	0.0303499	0.0877386	0.160574
95.045					0.124693	--	0.00994763	0.0301999	0.086923	0.160677
95.195					0.125156	--	0.00981908	0.0301969	0.0865516	0.160324
95.345					0.124717	--	0.00975176	0.0302173	0.0862061	0.16016
95.495					0.124599	--	0.00964821	0.0299375	0.0859904	0.160402
95.645					0.124661	--	0.00948274	0.0295649	0.0856459	0.159841
95.795					0.124328	--	0.0099072	0.0296018	0.085728	0.158874
95.946					0.123981	--	0.0095545	0.0290172	0.0851127	0.157812
96.096					0.122564	--	0.00967391	0.0290087	0.0841507	0.157262
96.246					0.122275	--	0.00968474	0.0288383	0.0834223	0.156874
96.396					0.122322	--	0.00933733	0.0284683	0.0833576	0.156507
96.546					0.122081	--	0.00951427	0.0282006	0.0826869	0.156131
96.696					0.121821	--	0.00932363	0.0287262	0.0826022	0.156463
96.846					0.121671	--	0.00934558	0.028544	0.0824706	0.156124
96.997					0.121463	--	0.00939797	0.0280342	0.0828201	0.154054
97.147					0.120208	--	0.00944438	0.0278063	0.0818272	0.153723
97.297					0.119596	--	0.00957684	0.0284314	0.0809647	0.15414
97.447					0.119862	--	0.00919676	0.0281028	0.0805741	0.153496
97.597					0.119423	--	0.00905886	0.0280201	0.0804563	0.153822
97.747					0.119628	--	0.00911802	0.0277349	0.0799762	0.153435
97.897					0.119508	--	0.00934879	0.0283518	0.0802782	0.153716
98.048					0.119361	--	0.00888488	0.0277349	0.0800559	0.15192
98.198					0.119275	--	0.00944132	0.0274954	0.0798065	0.151046
98.348					0.117662	--	0.00938982	0.0272471	0.0788157	0.150586
98.498					0.117156	--	0.00903677	0.027055	0.0780008	0.150533
98.648					0.116878	--	0.00894681	0.0271239	0.0777237	0.150516
98.798					0.116374	--	0.0089821	0.0273515	0.0777934	0.150409
98.948					0.116962	--	0.00870957	0.026757	0.0774373	0.150759
99.099					0.116638	--	0.00913206	0.0269079	0.0774012	0.150458
99.249					0.116021	--	0.00909632	0.02627	0.0772591	0.149418
99.399					0.115455	--	0.00913023	0.026063	0.0768659	0.148097
99.549					0.114558	--	0.00945718	0.0256438	0.0760838	0.147455
99.699					0.113788	--	0.00869079	0.0260111	0.0756243	0.147769
99.849					0.114765	--	0.00852531	0.0259215	0.0750486	0.147438
100					0.114038	--	0.00890623	0.0258566	0.0751614	0.147163
100.15					0.114058	--	0.00881	0.0259411	0.0747984	0.147143
100.3					0.113625	--	0.00896574	0.0256257	0.0748246	0.146359
100.45					0.113506	--	0.0086637	0.0255553	0.0745578	0.145599
100.6					0.112902	--	0.00860909	0.0250767	0.0739965	0.144946
100.75					0.112068	--	0.00864932	0.0251873	0.0733389	0.144505
100.9					0.111891	--	0.00903257	0.0251069	0.0726209	0.144439
101.051					0.111846	--	0.00835014	0.02502	0.0725434	0.144148
101.201					0.111231	--	0.00903286	0.024966	0.0722345	0.144037
101.351					0.11161	--	0.00873324	0.0251658	0.0721339	0.143568
101.501					0.111503	--	0.00842196	0.024802	0.0719247	0.143314
101.651					0.110752	--	0.00820058	0.0243624	0.0721809	0.141925
101.801					0.110172	--	0.00856608	0.0239604	0.0716884	0.141954
101.951					0.109588	--	0.00833383	0.0240648	0.0709796	0.141888
102.102					0.109102	--	0.00839023	0.0240816	0.0701024	0.141173
102.252					0.109648	--	0.00803154	0.0239144	0.0704831	0.140828
102.402					0.109477	--	0.00828757	0.0237996	0.0702629	0.140694
102.552					0.109533	--	0.00833324	0.0240664	0.0704076	0.140402
102.702					0.109069	--	0.00812224	0.023615	0.0701983	0.13986
102.852					0.108661	--	0.00831559	0.0232269	0.0699615	0.138659
103.003					0.107952	--	0.00840342	0.0230254	0.0692094	0.137976
103.153					0.10703	--	0.00782312	0.0227088	0.0686017	0.13824
103.303					0.107436	--	0.00798508	0.0228339	0.0681965	0.137179
103.453					0.106823	--	0.00816821	0.0232094	0.0682144	0.136399
103.603					0.10697	--	0.00820221	0.0228106	0.068111	0.136652
103.753					0.107047	--	0.00824101	0.0229298	0.06792	0.136173
103.903					0.106585	--	0.00815279	0.0226346	0.0678566	0.135269
104.054					0.105778	--	0.00814216	0.0221279	0.0674901	0.13413
104.204					0.105355	--	0.00798667	0.0220411	0.0666815	0.133732
104.354					0.105286	--	0.00819776	0.0219987	0.0660927	0.134332
104.504					0.105334	--	0.00796319	0.0221429	0.0658604	0.133404
104.654					0.104557	--	0.00790719	0.0218016	0.0662406	0.133545
104.804					0.103902	--	0.00814631	0.0220395	0.0656662	0.133691
104.954					0.104557	--	0.00798795	0.0219381	0.065342	0.133235
105.105					0.103514	--	0.00813262	0.0217945	0.065674	0.132001
105.255					0.103775	--	0.00811152	0.0209807	0.0648977	0.131261
105.405					0.103097	--	0.00813193	0.0214859	0.0641738	0.131224
105.555					0.102128	--	0.0080008	0.0212971	0.0637211	0.130884
105.705					0.102432	--	0.00786449	0.0210101	0.0639513	0.130883
105.855					0.102306	--	0.00768769	0.0211024	0.0636423	0.13099
106.006					0.101868	--	0.00788297	0.0209444	0.0635873	0.130612
106.156					0.102019	--	0.00781303	0.0207805	0.0634988	0.130058
106.306					0.101726	--	0.00831925	0.0209037	0.0634773	0.128529
106.456					0.100895	--	0.00815615	0.0207442	0.0629336	0.127967
106.606					0.100365	--	0.00866123	0.0203442	0.0623216	0.128365
106.756					0.100187	--	0.00849837	0.0205158	0.061913	0.128208
106.906					0.100529	--	0.00815674	0.0202234	0.0620511	0.128205
107.057					0.100116	--	0.0081218	0.0204254	0.0615773	0.127946
107.207					0.100194	--	0.00769599	0.0205028	0.0611983	0.128067
107.357					0.1	--	0.00795652	0.0200151	0.0609592	0.126641
107.507					0.0993248	--	0.00795044	0.0196667	0.0610692	0.125553
107.657					0.0991923	--	0.00770148	0.0194788	0.0605771	0.125027
107.807					0.0983732	--	0.00811483	0.0196012	0.0596909	0.125061
107.957					0.0988102	--	0.00772506	0.019742	0.0594223	0.124722
108.108					0.098475	--	0.00754094	0.0197552	0.0593533	0.124581
108.258					0.0976873	--	0.00763421	0.0198635	0.0589211	0.124986
108.408					0.0977793	--	0.00730286	0.0192881	0.0591531	0.12406
108.558					0.0979739	--	0.00754134	0.0191932	0.0591144	0.124009
108.708					0.0977397	--	0.00703858	0.0191386	0.0591955	0.123391
108.858					0.0965514	--	0.00735614	0.0188723	0.0582871	0.122517
109.009					0.0959234	--	0.00748776	0.0185839	0.0578582	0.123096
109.159					0.0963077	--	0.00758928	0.0188825	0.0578628	0.122131
109.309					0.0964034	--	0.00703255	0.0186905	0.0577033	0.122349
109.459					0.0964803	--	0.00697685	0.0188412	0.057144	0.122017
109.609					0.096234	--	0.0069165	0.0184283	0.0570398	0.12217
109.759					0.096032	--	0.00694694	0.0185019	0.0572233	0.121052
109.909					0.0955118	--	0.00684562	0.0178752	0.056979	0.119681
110.06					0.0945888	--	0.00738496	0.0182132	0.0564411	0.119736
110.21					0.093916	--	0.00676091	0.0179349	0.0560746	0.119685
110.36					0.0944324	--	0.00654378	0.0179091	0.0557034	0.11915
110.51					0.0940832	--	0.00665588	0.0177278	0.0556665	0.119036
110.66					0.0944309	--	0.00671296	0.0179736	0.0555626	0.118726
110.81					0.094099	--	0.00667713	0.0174698	0.0553219	0.118209
110.96					0.0940554	--	0.00650715	0.0174496	0.0555458	0.117007
111.111					0.0931798	--	0.00660774	0.017325	0.0546976	0.116419
111.261					0.092585	--	0.00649579	0.0171072	0.0542798	0.116667
111.411					0.0924202	--	0.00666863	0.0175096	0.0537968	0.116425
111.561					0.0926369	--	0.00617447	0.0172299	0.0537736	0.116643
111.711					0.0923676	--	0.0061586	0.0171381	0.0537287	0.116324
111.861					0.0926646	--	0.00624154	0.0169794	0.0536227	0.115366
112.011					0.092343	--	0.00632181	0.0169067	0.0535185	0.114927
112.162					0.0914667	--	0.00599748	0.0165838	0.0534307	0.113906
112.312					0.0912731	--	0.00652653	0.0165496	0.0532738	0.11346
112.462					0.0907377	--	0.00617689	0.0164676	0.0525733	0.112823
112.612					0.0904615	--	0.00594424	0.0165131	0.0525638	0.112724
112.762					0.0906622	--	0.00633693	0.0163079	0.0523334	0.112392
112.912					0.0906047	--	0.00598665	0.0162595	0.0520365	0.112849
113.063					0.0906547	--	0.00600168	0.0163896	0.0517638	0.112302
113.213					0.0904392	--	0.00602347	0.0164391	0.051885	0.111203
113.363					0.0901411	--	0.00590861	0.0158611	0.0515884	0.110626
113.513					0.0892603	--	0.00589833	0.0157601	0.0508262	0.109723
113.663					0.0887434	--	0.00576023	0.0158115	0.0506192	0.109678
113.813					0.0886135	--	0.00551098	0.015819	0.0505263	0.109069
113.963					0.0888085	--	0.00535202	0.015823	0.0503046	0.10914
114.114					0.0882347	--	0.0055305	0.0161659	0.0497479	0.109316
114.264					0.0884519	--	0.00541366	0.0159315	0.0500104	0.108904
114.414					0.0883831	--	0.005612	0.0155814	0.0499189	0.107934
114.564					0.087861	--	0.005354	0.0153726	0.0495651	0.106908
114.714					0.0869336	--	0.00533636	0.0153124	0.049069	0.106805
114.864					0.0864389	--	0.00553673	0.0151135	0.0486339	0.106659
115.014					0.0866334	--	0.00532217	0.0152341	0.0487718	0.106063
115.165					0.0866656	--	0.00503901	0.0150405	0.0484758	0.106399
115.315					0.0868979	--	0.00498474	0.0150905	0.0484557	0.106133
115.465					0.086526	--	0.00508621	0.0152445	0.048303	0.105399
115.615					0.0864819	--	0.00467637	0.01479	0.0483728	0.10459
115.765					0.0854391	--	0.00511809	0.014649	0.0478902	0.103807
115.915					0.0849894	--	0.00494866	0.0145414	0.0472938	0.10405
116.066					0.0846694	--	0.00491895	0.0144594	0.0467669	0.103793
116.216					0.0856535	--	0.00482875	0.0145417	0.0468285	0.103457
116.366					0.0848728	--	0.00486879	0.0147938	0.0469024	0.103385
116.516					0.0848185	--	0.00452345	0.0142141	0.0468731	0.103221
116.666					0.0852474	--	0.00467954	0.0143415	0.0467871	0.102591
116.816					0.0848661	--	0.00486296	0.0138766	0.0465589	0.101333
116.966					0.0841623	--	0.00495578	0.0140484	0.0460409	0.100984
117.117					0.0833597	--	0.00483434	0.0135726	0.0455902	0.100613
117.267					0.0832199	--	0.00470489	0.0139086	0.0451965	0.100694
117.417					0.0835917	--	0.00455202	0.0138733	0.0453958	0.100642
117.567					0.083343	--	0.00434735	0.0136389	0.0454025	0.100278
117.717					0.0832764	--	0.00441531	0.0133951	0.0449852	0.100077
117.867					0.0833022	--	0.00446528	0.0131441	0.0451988	0.0993849
118.017					0.0827913	--	0.0044977	0.0133836	0.0448214	0.098834
118.168					0.0823567	--	0.00450076	0.0132004	0.0442932	0.0985216
118.318					0.0819562	--	0.00434482	0.0132327	0.0438775	0.0983788
118.468					0.0816898	--	0.00452829	0.0130936	0.0439744	0.0983138
118.618					0.0813891	--	0.00424518	0.0131467	0.0440595	0.0979034
118.768					0.0805486	--	0.00444076	0.0131172	0.0438225	0.0977304
118.918					0.0811745	--	0.00439208	0.0126921	0.0437123	0.0974634
119.069					0.081242	--	0.0044075	0.0126744	0.0438271	0.0966326
119.219					0.0804692	--	0.00445336	0.0123582	0.0435717	0.0956905
119.369					0.0800603	--	0.00422858	0.012571	0.0432474	0.0955869
119.519					0.0797532	--	0.00446518	0.0127637	0.0426705	0.0958842
119.669					0.079468	--	0.00427163	0.0124463	0.0424393	0.0948482
119.819					0.0792005	--	0.0039169	0.0128421	0.0419391	0.0947635
119.969					0.0789299	--	0.00388304	0.0127164	0.0421918	0.0948393
120.12					0.0792243	--	0.00396266	0.012638	0.0420686	0.0940465
120.27					0.0789443	--	0.00420876	0.0120482	0.0419679	0.0933407
120.42					0.0787717	--	0.00389465	0.0120796	0.0415694	0.0929008
120.57					0.0782199	--	0.0040328	0.0123144	0.0410935	0.0929155
120.72					0.0782217	--	0.00393108	0.0119443	0.0404468	0.092961
120.87					0.078158	--	0.00390187	0.0116646	0.0407225	0.0923156
121.02					0.077787	--	0.00360008	0.0119301	0.0404153	0.0924786
121.171					0.077938	--	0.00361658	0.0119366	0.0404943	0.0926867
121.321					0.0781489	--	0.0038005	0.0116238	0.0403963	0.0917642
121.471					0.0773981	--	0.00377781	0.0115306	0.0401885	0.0909361
121.621					0.0764342	--	0.00345462	0.01121	0.039627	0.0904863
121.771					0.0760659	--	0.00353098	0.0111272	0.0392261	0.0905694
121.921					0.0764839	--	0.00365425	0.0113308	0.0391164	0.0901846
122.072					0.0764419	--	0.00340722	0.0110182	0.0390581	0.0901596
122.222					0.0758531	--	0.00317931	0.0111933	0.0388019	0.0904056
122.372					0.0761664	--	0.00305288	0.0111692	0.038791	0.0901034
122.522					0.0757571	--	0.00347058	0.0111832	0.0389435	0.0890855
122.672					0.0753246	--	0.00342842	0.0109051	0.0385368	0.0891059
122.822					0.0750197	--	0.00318594	0.0112642	0.038052	0.0880867
122.972					0.0745164	--	0.00312361	0.0109591	0.0375284	0.0882461
123.123					0.0748586	--	0.00318035	0.0107415	0.0376489	0.0879017
123.273					0.0748127	--	0.00319493	0.0105286	0.0377531	0.0882343
123.423					0.0747243	--	0.00318431	0.0106886	0.0372623	0.0875133
123.573					0.0743414	--	0.00298957	0.0106981	0.0370011	0.0874165
123.723					0.0743806	--	0.00333713	0.0103972	0.0373296	0.0866519
123.873					0.0738711	--	0.00312569	0.0103516	0.0369292	0.0858851
124.023					0.073314	--	0.00318055	0.0102696	0.0367753	0.0859071
124.174					0.0731644	--	0.00291602	0.0101774	0.0361231	0.0859969
124.324					0.0734703	--	0.00300588	0.010178	0.0360933	0.0859258
124.474					0.0731567	--	0.00277027	0.0104593	0.0356136	0.0855691
124.624					0.0731334	--	0.00284287	0.0104157	0.0354777	0.0854687
124.774					0.0731909	--	0.00271471	0.0103099	0.0356073	0.084633
124.924					0.0723339	--	0.00271397	0.00986154	0.0356042	0.0844298
125.075					0.0720576	--	0.00264996	0.010073	0.0354635	0.0839362
125.225					0.0713074	--	0.00280274	0.00997547	0.0351754	0.0840584
125.375					0.0711842	--	0.0028493	0.00980858	0.0348697	0.0833959
125.525					0.0713376	--	0.00283754	0.00959606	0.0346116	0.083407
125.675					0.0708233	--	0.00295868	0.0100844	0.034588	0.0831636
125.825					0.0711335	--	0.00258294	0.00973236	0.0340909	0.0830345
125.975					0.0708904	--	0.00284594	0.00973482	0.0347361	0.0822964
126.126					0.0709936	--	0.00250352	0.00969997	0.0344914	0.0817437
126.276					0.0702001	--	0.00276261	0.00958353	0.0339781	0.0813497
126.426					0.0697857	--	0.00277951	0.00988691	0.0334029	0.0812811
126.576					0.0698233	--	0.00223948	0.00977313	0.0334213	0.0808616
126.726					0.0699415	--	0.0023757	0.00989022	0.0333384	0.0807648
126.876					0.0695588	--	0.00227947	0.00984469	0.0331648	0.0810417
127.026					0.0693088	--	0.00206279	0.00969139	0.0331178	0.0805962
127.177					0.0695977	--	0.00237605	0.0095561	0.0331542	0.080029
127.327					0.0691704	--	0.00252872	0.00935225	0.03259	0.0794077
127.477					0.0681803	--	0.00228762	0.00969621	0.0323708	0.0793089
127.627					0.0678505	--	0.00248978	0.00902475	0.0324763	0.0795317
127.777					0.0682893	--	0.00247816	0.00899145	0.0320325	0.0791137
127.927					0.0681151	--	0.00210707	0.00901382	0.0319382	0.078732
128.077					0.0680415	--	0.00227047	0.00916295	0.0317031	0.0787941
128.228					0.0682741	--	0.00210682	0.00895585	0.0318005	0.078211
128.378					0.0679395	--	0.00218694	0.00901457	0.0316579	0.0778445
128.528					0.0676947	--	0.00202245	0.00867453	0.0314145	0.0773414
128.678					0.0664914	--	0.00211676	0.00874579	0.0309615	0.0771446
128.828					0.0665005	--	0.00205438	0.0089058	0.0308873	0.0769995
128.978					0.0668055	--	0.00193225	0.00861165	0.030791	0.0767581
129.129					0.0667819	--	0.00224897	0.00881559	0.0305727	0.0769027
129.279					0.0667371	--	0.00187808	0.00861465	0.0306772	0.0770203
129.429					0.0664165	--	0.00199972	0.00877653	0.030471	0.0765008
129.579					0.0660906	--	0.00197016	0.0086471	0.030394	0.0755527
129.729					0.0658995	--	0.00191683	0.00824904	0.0300553	0.0750395
129.879					0.0650105	--	0.00178902	0.00857404	0.0295529	0.0747679
130.029					0.0652484	--	0.00180711	0.00857223	0.0293848	0.0749441
130.18					0.0655119	--	0.00177241	0.00861516	0.0293958	0.0750112
130.33					0.0649782	--	0.00197051	0.00883485	0.029385	0.0744606
130.48					0.0652094	--	0.00153512	0.00841086	0.0292296	0.0748408
130.63					0.0653607	--	0.00164588	0.00834968	0.0292681	0.0744642
130.78					0.0640607	--	0.00195588	0.00809043	0.029142	0.0737533
130.93					0.0642894	--	0.0012825	0.00819433	0.0285531	0.0729006
131.08					0.0637018	--	0.00183083	0.0081845	0.0282711	0.0729052
131.231					0.0637751	--	0.00201346	0.00789681	0.0282376	0.0729186
131.381					0.0635818	--	0.00169936	0.00777767	0.0283425	0.072541
131.531					0.0631341	--	0.0015064	0.00778238	0.0283736	0.0729407
131.681					0.0633775	--	0.00121182	0.00800312	0.0280892	0.0725028
131.831					0.0631299	--	0.00131972	0.00789696	0.0279201	0.0721048
131.981					0.0629103	--	0.00104328	0.00763154	0.0278535	0.0712268
132.132					0.0625263	--	0.00132392	0.00754659	0.0275265	0.0710261
132.282					0.0619758	--	0.00140611	0.00739786	0.0270712	0.0708645
132.432					0.0619481	--	0.000947542	0.00719938	0.0273091	0.0702786
132.582					0.0621822	--	0.00111371	0.00736266	0.02706	0.0703589
132.732					0.0617968	--	0.00128991	0.00781387	0.026761	0.0705108
132.882					0.0618237	--	0.000904393	0.00753451	0.0270624	0.0702714
133.032					0.0615528	--	0.00116032	0.00763199	0.0267677	0.0692746
133.183					0.0615769	--	0.00104664	0.00744449	0.0265112	0.0692459
133.333					0.0605912	--	0.000956587	0.00768941	0.0261492	0.0690389
133.483					0.0606601	--	0.000979026	0.00714091	0.0256817	0.0690937
133.633					0.0604169	--	0.00116714	0.00740994	0.0260341	0.0689703
133.783					0.0604561	--	0.000989752	0.00734175	0.0256571	0.0691505
133.933					0.060281	--	0.00115978	0.00714933	0.0256401	0.0688921
134.083					0.0603	--	0.00117747	0.00731582	0.025677	0.0682758
134.234					0.0600803	--	0.00087627	0.00711749	0.0255389	0.0681385
134.384					0.0591608	--	0.000967609	0.0070843	0.0253995	0.0671076
134.534					0.0589779	--	0.00083065	0.00688627	0.0252611	0.0669516
134.684					0.0591789	--	0.00114277	0.00692709	0.024846	0.0665794
134.834					0.0588506	--	0.00110121	0.00693356	0.0247537	0.0671249
134.984					0.0587469	--	0.00102509	0.00696776	0.0246251	0.0668371
135.135					0.0585793	--	0.000976407	0.0067938	0.0245484	0.0669971
135.285					0.0586915	--	0.000972552	0.00677088	0.0245212	0.0659506
135.435					0.0584689	--	0.000887935	0.00647522	0.0245404	0.0656779
135.585					0.0579668	--	0.000919271	0.00632498	0.0241948	0.0652222
135.735					0.0572112	--	0.00121469	0.00671241	0.0239929	0.0650936
135.885					0.0575721	--	0.000830699	0.00647041	0.0236959	0.0647903
136.035					0.0580073	--	0.000737927	0.00663127	0.0237585	0.0645812
136.186					0.0576786	--	0.000809891	0.00652261	0.0237068	0.0650135
136.336					0.0577518	--	0.000723841	0.00682865	0.0236419	0.0647206
136.486					0.0574873	--	0.000734764	0.00646544	0.0234585	0.0643551
136.636					0.0570645	--	0.000576008	0.00620909	0.02344	0.0636256
136.786					0.0561928	--	0.000699177	0.00650165	0.0233561	0.0637464
136.936					0.0560772	--	0.000636456	0.00625212	0.0229871	0.0637907
137.086					0.0560649	--	0.000652767	0.00610339	0.0228948	0.0633211
137.237					0.0560611	--	0.000435441	0.00614752	0.0225457	0.0630141
137.387					0.0557491	--	0.000275351	0.0066064	0.0224624	0.0630935
137.537					0.0558819	--	0.000217918	0.00634128	0.0224812	0.0628888
137.687					0.0554452	--	0.000884425	0.00621416	0.0224449	0.0626573
137.837					0.0552847	--	0.000436084	0.00619275	0.0223364	0.0617171
137.987					0.0545983	--	0.00068519	0.00576214	0.0221306	0.0616585
138.138					0.0543048	--	0.000641349	0.00571541	0.0219166	0.0619302
138.288					0.0548321	--	0.000612386	0.00570974	0.0217563	0.061228
138.438					0.0543766	--	0.00027629	0.00601352	0.0218318	0.061548
138.588					0.0540675	--	0.000349836	0.00600309	0.0219146	0.0615764
138.738					0.0543564	--	0	0.00586389	0.0215945	0.0606748
138.888					0.0543568	--	0.000475674	0.00543584	0.0217557	0.0601195
139.038					0.0532862	--	0.000241494	0.0054054	0.021494	0.0600115
139.189					0.0531289	--	0.000214903	0.00535536	0.021162	0.0601206
139.339					0.0530654	--	0.000107946	0.00553784	0.0209965	0.0600406
139.489					0.0528406	--	0.000382605	0.00576274	0.0210499	0.0596677
139.639					0.0529453	--	0.000223652	0.00535465	0.020853	0.0597824
139.789					0.0529517	--	0.000331795	0.00531123	0.020811	0.0597429
139.939					0.0526584	--	7.29031e-05	0.00516214	0.0207782	0.0591013
140.089					0.0525266	--	8.86699e-05	0.00537777	0.0209263	0.0588853
140.24					0.0519406	--	8.17503e-05	0.00483905	0.0207151	0.0585466
140.39					0.0516459	--	--	0.00518421	0.0204635	0.0580734
140.54					0.0512958	--	--	0.00503502	0.0201223	0.0576574
140.69					0.0516593	--	--	0.00523867	0.0201346	0.0576916
140.84					0.0511617	--	--	0.00514409	0.0200255	0.0577756
140.99					0.0516991	--	--	0.0049761	0.0202531	0.0573303
141.141					0.0517172	--	--	0.00465446	0.0204079	0.0568359
141.291					0.0507693	--	--	0.00492741	0.0198391	0.0561564
141.441					0.0508121	--	--	0.00480711	0.019515	0.0562655
141.591					0.0505296	--	--	0.00465863	0.0193949	0.0562315
141.741					0.0507383	--	--	0.00437696	0.019375	0.0558639
141.891					0.0507729	--	--	0.00453562	0.0193488	0.0559122
142.041					0.0505418	--	--	0.00457729	0.0191894	0.0562174
142.192					0.050547	--	--	0.00477366	0.0191416	0.0556589
142.342					0.0503137	--	--	0.00441005	0.0190455	0.0549738
142.492					0.0497961	--	--	0.00412281	0.0190208	0.054419
142.642					0.0490232	--	--	0.00436853	0.0185722	0.0545605
142.792					0.049164	--	--	0.00424276	0.0183225	0.0544612
142.942					0.0493139	--	--	0.00417065	0.0183906	0.054033
143.092					0.0490349	--	--	0.00434511	0.018161	0.0541974
143.243					0.0489765	--	--	0.00430424	0.0180952	0.0541867
143.393					0.0492093	--	--	0.00386757	0.018391	0.0538494
143.543					0.0489545	--	--	0.00400166	0.018044	0.0532766
143.693					0.0481822	--	--	0.00355476	0.0176862	0.0530709
143.843					0.0480545	--	--	0.00389189	0.0171224	0.0530946
143.993					0.0481041	--	--	0.00392093	0.016985	0.0526711
144.143					0.0481262	--	--	0.00371172	0.0171428	0.0523432
144.294					0.0476547	--	--	0.00372124	0.0169968	0.0524224
144.444					0.0477799	--	--	0.00362592	0.0166738	0.0525086
144.594					0.0477467	--	--	0.00366774	0.0170011	0.0519675
144.744					0.0472444	--	--	0.0031908	0.0165587	0.051343
144.894					0.0471094	--	--	0.00357081	0.0164335	0.0508046
145.044					0.0467202	--	--	0.00349483	0.0163941	0.0510022
145.195					0.0466683	--	--	0.00342207	0.0160831	0.0509611
145.345					0.0466442	--	--	0.00324751	0.0161413	0.0506561
145.495					0.0464912	--	--	0.00367195	0.016327	0.050793
145.645					0.0466131	--	--	0.00321211	0.01629	0.0504396
145.795					0.0468048	--	--	0.00289062	0.0162073	0.0504069
145.945					0.0462713	--	--	0.00295922	0.0157689	0.0497453
146.095					0.0460931	--	--	0.0030192	0.015721	0.0491654
146.246					0.0458718	--	--	0.0032436	0.0154812	0.049659
146.396					0.0454736	--	--	0.00283296	0.0153024	0.0489571
146.546					0.0455486	--	--	0.0029158	0.0155067	0.0495356
146.696					0.0454645	--	--	0.00309472	0.0152928	0.04922
146.846					0.045282	--	--	0.00303565	0.0153521	0.0491913
146.996					0.0450709	--	--	0.00285748	0.0155752	0.0489557
147.146					0.0446302	--	--	0.00277238	0.0152026	0.0480164
147.297					0.0445226	--	--	0.00292954	0.0148289	0.0480593
147.447					0.0437927	--	--	0.00233982	0.0146047	0.0482103
147.597					0.044015	--	--	0.00296008	0.0146958	0.0481823
147.747					0.0440462	--	--	0.00263458	0.014259	0.0478926
147.897					0.0438518	--	--	0.00258167	0.0143153	0.0479807
148.047					0.0440475	--	--	0.00291861	0.0143243	0.0472856
148.198					0.0436633	--	--	0.00268678	0.0144342	0.0470937
148.348					0.0430411	--	--	0.00252235	0.014363	0.0464739
148.498					0.0428888	--	--	0.00230587	0.0139405	0.0471122
148.648					0.0426469	--	--	0.00242045	0.0135516	0.0468254
148.798					0.0429571	--	--	0.0026267	0.0135716	0.0466886
148.948					0.0424873	--	--	0.00274565	0.0134936	0.0464788
149.098					0.0424631	--	--	0.00247246	0.0135107	0.0462702
149.249					0.0427445	--	--	0.00217925	0.0137758	0.0456988
149.399					0.0419914	--	--	0.0022463	0.0136075	0.0451961
149.549					0.0418807	--	--	0.0023855	0.0132061	0.0451479
149.699					0.0413959	--	--	0.00247506	0.0129566	0.0449191
149.849					0.041294	--	--	0.00241639	0.0131131	0.0447112
149.999					0.0416403	--	--	0.002315	0.0130736	0.0446141
150.149					0.0416041	--	--	0.00234278	0.013031	0.0448971
150.3					0.0413344	--	--	0.00230136	0.0127877	0.0450281
150.45					0.0414235	--	--	0.00221897	0.0128232	0.0441772
150.6					0.040892	--	--	0.00218742	0.0127601	0.0439681
150.75					0.0402524	--	--	0.00202024	0.012572	0.0436996
150.9					0.0403137	--	--	0.00208272	0.0121461	0.0437916
151.05					0.0404329	--	--	0.00209887	0.0120156	0.0437758
151.201					0.0401815	--	--	0.00204135	0.0121571	0.0434944
151.351					0.0403352	--	--	0.00200399	0.011948	0.0439807
151.501					0.0399053	--	--	0.00206351	0.0120911	0.0434791
151.651					0.0404625	--	--	0.0019212	0.0120019	0.0432742
151.801					0.0397975	--	--	0.0017147	0.0118568	0.0421298
151.951					0.0393443	--	--	0.0017147	0.0116764	0.0425639
152.101					0.0387661	--	--	0.00199085	0.0114355	0.0425476
152.252					0.0390312	--	--	0.00194567	0.0117202	0.0425182
152.402					0.0387157	--	--	0.0018864	0.0114704	0.0424667
152.552					0.0391543	--	--	0.00203899	0.0112769	0.0426489
152.702					0.0387794	--	--	0.00183149	0.0114257	0.0420987
152.852					0.038866	--	--	0.00215628	0.0113634	0.0420216
153.002					0.0381424	--	--	0.00180867	0.0109255	0.0417766
153.152					0.0379966	--	--	0.00190545	0.0108625	0.0415864
153.303					0.0377154	--	--	0.0015973	0.0107522	0.0416006
153.453					0.0376387	--	--	0.00166335	0.0108375	0.0414214
153.603					0.0377656	--	--	0.00166806	0.0105485	0.0415534
153.753					0.0374623	--	--	0.00184794	0.0104389	0.0414628
153.903					0.0376709	--	--	0.0017497	0.0107051	0.0411264
154.053					0.0375279	--	--	0.00141758	0.010551	0.0408444
154.204					0.0371944	--	--	0.00157875	0.0103573	0.040496
154.354					0.0366549	--	--	0.00157725	0.010147	0.0408046
154.504					0.0365139	--	--	0.00138564	0.0100771	0.0403956
154.654					0.0365221	--	--	0.00134271	0.00970488	0.040318
154.804					0.036187	--	--	0.00170582	0.00981694	0.0406009
154.954					0.0367355	--	--	0.00157369	0.00975905	0.0406024
155.104					0.0366327	--	--	0.0014582	0.0100711	0.0397522
155.255					0.0361803	--	--	0.00135751	0.0100652	0.0395226
155.405					0.0359556	--	--	0.00152163	0.00938077	0.0396031
155.555					0.0354596	--	--	0.00157599	0.00944949	0.0396608
155.705					0.0355474	--	--	0.00164499	0.00942033	0.0396014
155.855					0.0354658	--	--	0.00132993	0.00940295	0.0396097
156.005					0.0355474	--	--	0.00135736	0.0092589	0.0395811
156.155					0.0355298	--	--	0.00128058	0.00955444	0.0391901
156.306					0.0353981	--	--	0.000853287	0.00988115	0.0388973
156.456					0.0345826	--	--	0.000932116	0.0095335	0.0383947
156.606					0.0346005	--	--	0.00102133	0.00953895	0.0387954
156.756					0.034208	--	--	0.000980056	0.00943837	0.0387025
156.906					0.0343404	--	--	0.000952175	0.00921614	0.038627
157.056					0.0341958	--	--	0.00142174	0.00914919	0.0379923
157.206					0.034139	--	--	0.0010653	0.0090503	0.0383826
157.357					0.0341028	--	--	0.00120892	0.00890465	0.0378317
157.507					0.0338784	--	--	0.000598544	0.00900628	0.0376835
157.657					0.0333534	--	--	0.00088177	0.00862291	0.0374056
157.807					0.0328029	--	--	0.00101305	0.00870412	0.0376873
157.957					0.0331618	--	--	0.000626125	0.00829952	0.0376305
158.107					0.0331146	--	--	0.00074121	0.00851584	0.0373605
158.258					0.0327959	--	--	0.00121454	0.0085361	0.0374686
158.408					0.0331383	--	--	0.000764378	0.0082716	0.0377409
158.558					0.033081	--	--	0.000609175	0.0082475	0.0375108
158.708					0.0325727	--	--	0.000708966	0.00816714	0.036821
158.858					0.0320037	--	--	0.000601453	0.00828931	0.0366697
159.008					0.0321619	--	--	0.000729877	0.00783064	0.036405
159.158					0.0320336	--	--	0.000465456	0.00778006	0.036301
159.309					0.0319859	--	--	0.000754047	0.00782399	0.0362318
159.459					0.0322256	--	--	0.00049073	0.00775462	0.0363674
159.609					0.0318324	--	--	0.000324897	0.00763203	0.0362714
159.759					0.0316598	--	--	0.000314567	0.00779679	0.0358862
159.909					0.0315061	--	--	5.11992e-05	0.00757434	0.03547
160.059					0.0309217	--	--	0.000334324	0.00721217	0.0355388
160.209					0.0306177	--	--	0.000491432	0.00728669	0.0353926
160.36					0.0308309	--	--	0.000347763	0.00720708	0.0357511
160.51					0.0303064	--	--	0.000500007	0.00722981	0.035442
160.66					0.0304263	--	--	0.000248073	0.00697458	0.0353363
160.81					0.0306777	--	--	0.000119398	0.00709607	0.0348141
160.96					0.0305758	--	--	0	0.00706505	0.0345773
161.11					0.0302328	--	--	4.91432e-06	0.00693108	0.0341804
161.261					0.0300963	--	--	0.000235687	0.0067945	0.0341023
161.411					0.0295312	--	--	8.77557e-05	0.00647424	0.0342883
161.561					0.0301209	--	--	3.28959e-05	0.00656177	0.0338591
161.711					0.0300254	--	--	0.000367621	0.00649191	0.0339462
161.861					0.029851	--	--	0.000107463	0.00631596	0.0343893
162.011					0.0299195	--	--	0.000213422	0.00665703	0.0338253
162.161					0.0298059	--	--	3.48014e-05	0.00648712	0.0330539
162.312					0.0292677	--	--	0.00162035	0.0060427	0.0332639
162.462					0.0289317	--	--	0.00153931	0.00586092	0.0333133
162.612					0.029365	--	--	0.00167934	0.00581731	0.0329952
162.762					0.0292484	--	--	0.00157966	0.0061075	0.0332787
162.912					0.0290806	--	--	0.00144532	0.00592722	0.0332393
163.062					0.0290455	--	--	0.00158082	0.00612423	0.0328657
163.212					0.0293026	--	--	0.00152922	0.00612107	0.0325991
163.363					0.0288063	--	--	0.00132144	0.00610675	0.0324734
163.513					0.0282729	--	--	0.00122468	0.00580332	0.031779
163.663					0.0279906	--	--	0.000993013	0.0056141	0.0323948
163.813					0.0280691	--	--	0.00108121	0.00542198	0.032231
163.963					0.0283959	--	--	0.00110836	0.00538225	0.0318126
164.113					0.0279976	--	--	0.00111756	0.00569064	0.0320064
164.264					0.0285064	--	--	0.00110026	0.00531729	0.0317869
164.414					0.0279889	--	--	0.000753906	0.00546656	0.0317611
164.564					0.0279039	--	--	0.000873195	0.00538679	0.0313314
164.714					0.0274418	--	--	0.000861286	0.00529847	0.0310882
164.864					0.0271243	--	--	0.000724167	0.0050617	0.0310822
165.014					0.0270842	--	--	0.000822152	0.00498418	0.0310261
165.164					0.027155	--	--	0.000659197	0.00495796	0.0311467
165.315					0.0271292	--	--	0.000780735	0.00486928	0.0315301
165.465					0.0274511	--	--	0.000512947	0.00481926	0.0309871
165.615					0.0270779	--	--	0.000469016	0.00486547	0.0306307
165.765					0.0266243	--	--	0.000227164	0.00503294	0.030552
165.915					0.0265749	--	--	0.000312975	0.00454827	0.0304405
166.065					0.0265074	--	--	0.000187699	0.00438612	0.0301294
166.215					0.026631	--	--	0.00012253	0.00456458	0.0300673
166.366					0.0266429	--	--	0.000181083	0.00455186	0.0303694
166.516					0.0262388	--	--	0.000259616	0.00440429	0.0305181
166.666					0.0262666	--	--	0	0.00449906	0.0298922
166.816					0.0259835	--	--	--	0.00452848	0.0297403
166.966					0.0261399	--	--	--	0.00428114	0.0293195
167.116					0.0256666	--	--	--	0.00373158	0.0294779
167.267					0.0255068	--	--	--	0.00392282	0.0295503
167.417					0.0252789	--	--	--	0.00402921	0.0295754
167.567					0.0258081	--	--	--	0.00388065	0.0293145
167.717					0.0254768	--	--	--	0.00388868	0.0292619
167.867					0.0255177	--	--	--	0.00385564	0.0289895
168.017					0.0251555	--	--	--	0.00387798	0.0287524
168.167					0.0253385	--	--	--	0.00342009	0.0286513
168.318					0.0249335	--	--	--	0.0032208	0.0286185
168.468					0.0252978	--	--	--	0.00341921	0.0287588
168.618					0.024404	--	--	--	0.00322435	0.0286532
168.768					0.0249025	--	--	--	0.00302062	0.0287498
168.918					0.0250525	--	--	--	0.00316503	0.0284433
169.068					0.0252108	--	--	--	0.0032389	0.0280869
169.218					0.024636	--	--	--	0.00304338	0.0279211
169.369					0.0240663	--	--	--	0.00278724	0.0276613
169.519					0.0242663	--	--	--	0.00293778	0.0275689
169.669					0.0245572	--	--	--	0.00266165	0.0277102
169.819					0.0239311	--	--	--	0.00275952	0.0278422
169.969					0.024165	--	--	--	0.00275169	0.0279235
170.119					0.0242702	--	--	--	0.00278789	0.0275352
170.269					0.0240593	--	--	--	0.00293775	0.0270566
170.42					0.0237359	--	--	--	0.00261667	0.0272887
170.57					0.0232355	--	--	--	0.00246199	0.0271207
170.72					0.0231234	--	--	--	0.00219277	0.0271321
170.87					0.0234646	--	--	--	0.0021188	0.0268079
171.02					0.0231303	--	--	--	0.00234866	0.0270003
171.17					0.0230395	--	--	--	0.00222929	0.0271104
171.321					0.0231958	--	--	--	0.00216407	0.0269735
171.471					0.0232438	--	--	--	0.00227482	0.0264671
171.621					0.0225998	--	--	--	0.00218021	0.0259146
171.771					0.0226252	--	--	--	0.00170517	0.026134
171.921					0.0225878	--	--	--	0.00168273	0.025929
172.071					0.0223288	--	--	--	0.00185229	0.0257914
172.221					0.0225427	--	--	--	0.00173244	0.0261327
172.372					0.0223765	--	--	--	0.00145066	0.0261622
172.522					0.0225785	--	--	--	0.00172203	0.0258355
172.672					0.0223318	--	--	--	0.0019634	0.0253448
172.822					0.0214553	--	--	--	0.0015305	0.025198
172.972					0.0213737	--	--	--	0.00126516	0.0253436
173.122					0.0214663	--	--	--	0.0012785	0.0250113
173.272					0.0216959	--	--	--	0.00129816	0.025152
173.423					0.0214959	--	--	--	0.00121255	0.0253128
173.573					0.0215037	--	--	--	0.0010985	0.0249782
173.723					0.0217516	--	--	--	0.00105904	0.0248626
173.873					0.0214838	--	--	--	0.00108898	0.0242958
174.023					0.0210621	--	--	--	0.000859711	0.0244317
174.173					0.0208359	--	--	--	0.000725672	0.0243559
174.324					0.0208656	--	--	--	0.000865125	0.0243227
174.474					0.0207719	--	--	--	0.000771265	0.0241598
174.624					0.0210441	--	--	--	0.000662533	0.024146
174.774					0.0209512	--	--	--	0.000569684	0.0243391
174.924					0.0207987	--	--	--	0.000735456	0.0239151
175.074					0.0201498	--	--	--	0.000549073	0.0237192
175.224					0.0199888	--	--	--	0.000164011	0.0235385
175.375					0.0200276	--	--	--	0.000206995	0.0240094
175.525					0.0198302	--	--	--	0.000349057	0.0234539
175.675					0.0195323	--	--	--	0.000227019	0.0234589
175.825					0.0197817	--	--	--	0.000192482	0.0235612
175.975					0.0197359	--	--	--	0.000296615	0.02304
176.125					0.0192717	--	--	--	0.000305943	0.0228844
176.275					0.0191245	--	--	--	5.38115e-06	0.0228901
176.426					0.0189521	--	--	--	0	0.0229443
176.576					0.0189425	--	--	--	--	0.0227693
176.726					0.0188792	--	--	--	--	0.0222984
176.876					0.018985	--	--	--	--	0.0227424
177.026					0.0186241	--	--	--	--	0.0228304
177.176					0.0188323	--	--	--	--	0.0223924
177.327					0.0186619	--	--	--	--	0.0220967
177.477					0.0183058	--	--	--	--	0.0219474
177.627					0.0180847	--	--	--	--	0.0217741
177.777					0.0183517	--	--	--	--	0.0219221
177.927					0.0178613	--	--	--	--	0.0217728
178.077					0.01804	--	--	--	--	0.0220646
178.227					0.0182994	--	--	--	--	0.0216489
178.378					0.0179019	--	--	--	--	0.0215982
178.528					0.0175692	--	--	--	--	0.0212963
178.678					0.0175414	--	--	--	--	0.0211989
178.828					0.0173273	--	--	--	--	0.0212067
178.978					0.0175261	--	--	--	--	0.0209953
179.128					0.0168595	--	--	--	--	0.0208535
179.278					0.017201	--	--	--	--	0.0209929
179.429					0.0171789	--	--	--	--	0.0207525
179.579					0.0172897	--	--	--	--	0.0204322
179.729					0.0166041	--	--	--	--	0.0203135
179.879					0.0158742	--	--	--	--	0.0202629
180.029					0.0159993	--	--	--	--	0.020253
180.179					0.0163555	--	--	--	--	0.0203113
180.33					0.0159857	--	--	--	--	0.0203866
180.48					0.0161201	--	--	--	--	0.020325
180.63					0.0160175	--	--	--	--	0.0200405
180.78					0.0157323	--	--	--	--	0.0199714
180.93					0.0158386	--	--	--	--	0.0195702
181.08					0.0158955	--	--	--	--	0.0198971
181.23					0.0156311	--	--	--	--	0.0193358
181.381					0.0156791	--	--	--	--	0.0192896
181.531					0.0154945	--	--	--	--	0.0197294
181.681					0.0155382	--	--	--	--	0.0196345
181.831					0.0154213	--	--	--	--	0.0192896
181.981					0.0153805	--	--	--	--	0.0189427
182.131					0.0147221	--	--	--	--	0.018927
182.281					0.0145719	--	--	--	--	0.0191439
182.432					0.0148037	--	--	--	--	0.0189135
182.582					0.0146264	--	--	--	--	0.0188277
182.732					0.0149801	--	--	--	--	0.0188738
182.882					0.0147749	--	--	--	--	0.0185062
183.032					0.0145281	--	--	--	--	0.0183673
183.182					0.0145522	--	--	--	--	0.0180505
183.332					0.0141608	--	--	--	--	0.0183575
183.483					0.0141373	--	--	--	--	0.0185745
183.633					0.0137828	--	--	--	--	0.0185921
183.783					0.0139416	--	--	--	--	0.0186247
183.933					0.0138888	--	--	--	--	0.0185181
184.083					0.0141542	--	--	--	--	0.0183365
184.233					0.0141002	--	--	--	--	0.0180233
184.384					0.0139097	--	--	--	--	0.017796
184.534					0.0134269	--	--	--	--	0.0177887
184.684					0.013387	--	--	--	--	0.0177277
184.834					0.0135971	--	--	--	--	0.0177069
184.984					0.0134233	--	--	--	--	0.0178098
185.134					0.0132061	--	--	--	--	0.0178034
185.284					0.0138158	--	--	--	--	0.0175445
185.435					0.0133921	--	--	--	--	0.0173518
185.585					0.013073	--	--	--	--	0.0173241
185.735					0.01321	--	--	--	--	0.0171349
185.885					0.0129206	--	--	--	--	0.01741
186.035					0.0126803	--	--	--	--	0.0172371
186.185					0.0128607	--	--	--	--	0.0172553
186.335					0.0129001	--	--	--	--	0.017178
186.486					0.0127206	--	--	--	--	0.0168732
186.636					0.0123938	--	--	--	--	0.01645
186.786					0.0123651	--	--	--	--	0.0163171
186.936					0.0121762	--	--	--	--	0.0164394
187.086					0.012364	--	--	--	--	0.016412
187.236					0.0122378	--	--	--	--	0.0163771
187.387					0.0118625	--	--	--	--	0.0166703
187.537					0.012047	--	--	--	--	0.0165495
187.687					0.0122122	--	--	--	--	0.0157637
187.837					0.0116342	--	--	--	--	0.0160695
187.987					0.0115405	--	--	--	--	0.0155588
188.137					0.0116362	--	--	--	--	0.0156248
188.287					0.0119622	--	--	--	--	0.0156641
188.438					0.011672	--	--	--	--	0.015562
188.588					0.0114514	--	--	--	--	0.0156596
188.738					0.0115207	--	--	--	--	0.0156021
188.888					0.0116583	--	--	--	--	0.015364
189.038					0.0115617	--	--	--	--	0.0149995
189.188					0.0110484	--	--	--	--	0.0153162
189.338					0.0110875	--	--	--	--	0.0152712
189.489					0.0111939	--	--	--	--	0.0148605
189.639					0.0109915	--	--	--	--	0.0154424
189.789					0.0108718	--	--	--	--	0.0153891
189.939					0.0111181	--	--	--	--	0.0150367
190.089					0.0108741	--	--	--	--	0.0147907
190.239					0.0107526	--	--	--	--	0.0146769
190.39					0.0100554	--	--	--	--	0.0149132
190.54					0.0101593	--	--	--	--	0.0148127
190.69					0.0106477	--	--	--	--	0.0146033
190.84					0.0103552	--	--	--	--	0.0148518
190.99					0.0104915	--	--	--	--	0.0145957
191.14					0.0106844	--	--	--	--	0.01442
191.29					0.0100911	--	--	--	--	0.0141543
191.441					0.010602	--	--	--	--	0.014214
191.591					0.00994223	--	--	--	--	0.0139791
191.741					0.00994568	--	--	--	--	0.013921
191.891					0.0100728	--	--	--	--	0.0138522
192.041					0.0100081	--	--	--	--	0.0144052
192.191					0.0099488	--	--	--	--	0.0140448
192.341					0.0102772	--	--	--	--	0.0136662
192.492					0.00998222	--	--	--	--	0.0135356
192.642					0.00956157	--	--	--	--	0.0135862
192.792					0.00964756	--	--	--	--	0.0134908
192.942					0.00961288	--	--	--	--	0.0138409
193.092					0.00963538	--	--	--	--	0.0132562
193.242					0.00953682	--	--	--	--	0.0136014
193.393					0.0100024	--	--	--	--	0.0134715
193.543					0.00985638	--	--	--	--	0.0130617
193.693					0.00967568	--	--	--	--	0.0128766
193.843					0.00945419	--	--	--	--	0.0127922
193.993					0.00911831	--	--	--	--	0.0127583
194.143					0.00938433	--	--	--	--	0.0128433
194.293					0.00910214	--	--	--	--	0.0128999
194.444					0.00940533	--	--	--	--	0.0128868
194.594					0.00927812	--	--	--	--	0.0126385
194.744					0.00908358	--	--	--	--	0.0121499
194.894					0.00901361	--	--	--	--	0.0123968
195.044					0.00902594	--	--	--	--	0.012303
195.194					0.00904153	--	--	--	--	0.0124619
195.344					0.00901001	--	--	--	--	0.0122232
195.495					0.00885605	--	--	--	--	0.0124256
195.645					0.00946335	--	--	--	--	0.0117811
195.795					0.00917834	--	--	--	--	0.0118064
195.945					0.00885454	--	--	--	--	0.0117184
196.095					0.00885323	--	--	--	--	0.0113808
196.245					0.00833284	--	--	--	--	0.0116971
196.395					0.00835511	--	--	--	--	0.0116132
196.546					0.00874823	--	--	--	--	0.0112419
196.696					0.00843584	--	--	--	--	0.0112109
196.846					0.00845114	--	--	--	--	0.0111843
196.996					0.0087364	--	--	--	--	0.010783
197.146					0.00835262	--	--	--	--	0.0109749
197.296					0.00803589	--	--	--	--	0.0111502
197.447					0.00818327	--	--	--	--	0.0111944
197.597					0.00773548	--	--	--	--	0.0106406
197.747					0.00819243	--	--	--	--	0.0109376
197.897					0.00794294	--	--	--	--	0.0110004
198.047					0.00816052	--	--	--	--	0.0103578
198.197					0.00813962	--	--	--	--	0.0104211
198.347					0.00782342	--	--	--	--	0.0105164
198.498					0.00742518	--	--	--	--	0.0102169
198.648					0.0073561	--	--	--	--	0.0103182
198.798					0.00780623	--	--	--	--	0.0104626
198.948					0.00753778	--	--	--	--	0.0102723
199.098					0.00751254	--	--	--	--	0.0105062
199.248					0.00746757	--	--	--	--	0.00998531
199.398					0.00743741	--	--	--	--	0.00989011
199.549					0.00728711	--	--	--	--	0.00998146
199.699					0.00732682	--	--	--	--	0.00979871
199.849					0.0071505	--	--	--	--	0.00995534
199.999					0.00728959	--	--	--	--	0.00969431
200.149					0.00747541	--	--	--	--	0.00992498
200.299					0.00725471	--	--	--	--	0.00985712
200.45					0.00712857	--	--	--	--	0.00932606
200.6					0.00717262	--	--	--	--	0.00953807
200.75					0.00722187	--	--	--	--	0.00927253
200.9					0.00717496	--	--	--	--	0.00927997
201.05					0.00689822	--	--	--	--	0.00934889
201.2					0.00673511	--	--	--	--	0.00952546
201.35					0.00724589	--	--	--	--	0.00940015
201.501					0.00713267	--	--	--	--	0.00956822
201.651					0.00716394	--	--	--	--	0.00922941
201.801					0.0068003	--	--	--	--	0.0086903
201.951					0.00671674	--	--	--	--	0.0090107
202.101					0.00648493	--	--	--	--	0.00878388
202.251					0.00652766	--	--	--	--	0.00875882
202.401					0.00663723	--	--	--	--	0.00880645
202.552					0.00679002	--	--	--	--	0.00854024
202.702					0.0068038	--	--	--	--	0.00862506
202.852					0.00677784	--	--	--	--	0.00889604
203.002					0.00620518	--	--	--	--	0.00828398
203.152					0.00612844	--	--	--	--	0.00840859
203.302					0.00585838	--	--	--	--	0.00810492
203.453					0.00623178	--	--	--	--	0.00844688
203.603					0.00588128	--	--	--	--	0.00861249
203.753					0.00609107	--	--	--	--	0.00855847
203.903					0.00632936	--	--	--	--	0.00840491
204.053					0.0064881	--	--	--	--	0.00816328
204.203					0.00605634	--	--	--	--	0.00790737
204.353					0.00592654	--	--	--	--	0.00791832
204.504					0.00601853	--	--	--	--	0.00736694
204.654					0.00580581	--	--	--	--	0.00785103
204.804					0.00574482	--	--	--	--	0.00798163
204.954					0.00573074	--	--	--	--	0.00796284
205.104					0.00601229	--	--	--	--	0.00790097
205.254					0.00605965	--	--	--	--	0.00777247
205.404					0.00558419	--	--	--	--	0.00759065
205.555					0.00547661	--	--	--	--	0.00743713
205.705					0.00523398	--	--	--	--	0.00717491
205.855					0.00519033	--	--	--	--	0.00728611
206.005					0.00555096	--	--	--	--	0.007323
206.155					0.00540421	--	--	--	--	0.00728493
206.305					0.00549493	--	--	--	--	0.00732607
206.456					0.00521337	--	--	--	--	0.00695839
206.606					0.00492661	--	--	--	--	0.00670025
206.756					0.00530736	--	--	--	--	0.00694665
206.906					0.00516426	--	--	--	--	0.00693723
207.056					0.00513761	--	--	--	--	0.00714793
207.206					0.00482668	--	--	--	--	0.0072118
207.356					0.00532831	--	--	--	--	0.00688225
207.507					0.0050679	--	--	--	--	0.00659926
207.657					0.00461606	--	--	--	--	0.00639181
207.807					0.00478434	--	--	--	--	0.00666038
207.957					0.00485362	--	--	--	--	0.00697105
208.107					0.00483043	--	--	--	--	0.00659668
208.257					0.00484997	--	--	--	--	0.00664702
208.407					0.00449699	--	--	--	--	0.00661968
208.558					0.00457972	--	--	--	--	0.00666524
208.708					0.00461996	--	--	--	--	0.00634348
208.858					0.00420657	--	--	--	--	0.00620784
209.008					0.00412452	--	--	--	--	0.00641998
209.158					0.0041197	--	--	--	--	0.00618015
209.308					0.00416998	--	--	--	--	0.00618944
209.458					0.00450805	--	--	--	--	0.00619176
209.609					0.00446951	--	--	--	--	0.00607588
209.759					0.00438961	--	--	--	--	0.00611202
209.909					0.00407507	--	--	--	--	0.00594523
210.059					0.00412871	--	--	--	--	0.00587048
210.209					0.00335752	--	--	--	--	0.00586584
210.359					0.00370899	--	--	--	--	0.00581822
210.51					0.00393096	--	--	--	--	0.00587403
210.66					0.00391848	--	--	--	--	0.00571955
210.81					0.00373086	--	--	--	--	0.00583727
210.96					0.00412467	--	--	--	--	0.00554198
211.11					0.00340487	--	--	--	--	0.00538653
211.26					0.00348229	--	--	--	--	0.00552704
211.41					0.00334953	--	--	--	--	0.0058937
211.561					0.00369052	--	--	--	--	0.00577743
211.711					0.00352721	--	--	--	--	0.00540059
211.861					0.00342651	--	--	--	--	0.00563201
212.011					0.0036896	--	--	--	--	0.00585362
212.161					0.00332005	--	--	--	--	0.00504983
212.311					0.00322631	--	--	--	--	0.00485736
212.461					0.00300771	--	--	--	--	0.00514122
212.612					0.00306773	--	--	--	--	0.00488155
212.762					0.00351566	--	--	--	--	0.00517132
212.912					0.00335021	--	--	--	--	0.005134
213.062					0.00317725	--	--	--	--	0.0053046
213.212					0.00316268	--	--	--	--	0.00493412
213.362					0.00322173	--	--	--	--	0.00510959
213.513					0.00315182	--	--	--	--	0.00453508
213.663					0.00277857	--	--	--	--	0.0049906
213.813					0.00260756	--	--	--	--	0.00489241
213.963					0.00296605	--	--	--	--	0.00474674
214.113					0.00270929	--	--	--	--	0.00468847
214.263					0.00296215	--	--	--	--	0.00496781
214.413					0.00258642	--	--	--	--	0.00473272
214.564					0.00281994	--	--	--	--	0.00458152
214.714					0.00241999	--	--	--	--	0.00452404
214.864					0.00234423	--	--	--	--	0.00460492
215.014					0.00257804	--	--	--	--	0.00463795
215.164					0.00222462	--	--	--	--	0.00472606
215.314					0.00277448	--	--	--	--	0.00428167
215.464					0.00252074	--	--	--	--	0.00443234
215.615					0.00253448	--	--	--	--	0.00431496
215.765					0.00243743	--	--	--	--	0.00410558
215.915					0.00171447	--	--	--	--	0.00426611
216.065					0.00252947	--	--	--	--	0.0039557
216.215					0.00236664	--	--	--	--	0.00373129
216.365					0.00233302	--	--	--	--	0.00416504
216.516					0.00214155	--	--	--	--	0.00414874
216.666					0.00204674	--	--	--	--	0.00408008
216.816					0.00215666	--	--	--	--	0.0037684
216.966					0.00190185	--	--	--	--	0.00364428
217.116					0.00202594	--	--	--	--	0.00367219
217.266					0.00180207	--	--	--	--	0.0036944
217.416					0.00164115	--	--	--	--	0.00356318
217.567					0.00194726	--	--	--	--	0.00349168
217.717					0.00183764	--	--	--	--	0.00375368
217.867					0.00195286	--	--	--	--	0.00344064
218.017					0.00174989	--	--	--	--	0.00314583
218.167					0.00146853	--	--	--	--	0.00346001
218.317					0.001403	--	--	--	--	0.00328046
218.467					0.00141504	--	--	--	--	0.00311801
218.618					0.00150268	--	--	--	--	0.00289496
218.768					0.00123116	--	--	--	--	0.00298039
218.918					0.0015022	--	--	--	--	0.00319393
219.068					0.00164714	--	--	--	--	0.0031467
219.218					0.00179335	--	--	--	--	0.00283016
219.368					0.00118663	--	--	--	--	0.00316949
219.519					0.00136222	--	--	--	--	0.00287555
219.669					0.00131155	--	--	--	--	0.00309772
219.819					0.00132583	--	--	--	--	0.00300804
219.969					0.00117216	--	--	--	--	0.00314324
220.119					0.00167364	--	--	--	--	0.00276939
220.269					0.00153737	--	--	--	--	0.00291393
220.419					0.00122274	--	--	--	--	0.00273675
220.57					0.000984444	--	--	--	--	0.0024606
220.72					0.000804861	--	--	--	--	0.00266547
220.87					0.000907125	--	--	--	--	0.00289426
221.02					0.00119487	--	--	--	--	0.00288505
221.17					0.00119428	--	--	--	--	0.00271094
221.32					0.00123438	--	--	--	--	0.00258253
221.47					0.00108724	--	--	--	--	0.00238861
221.621					0.000633073	--	--	--	--	0.00235663
221.771					0.000587958	--	--	--	--	0.00262752
221.921					0.000905469	--	--	--	--	0.00258551
222.071					0.000409641	--	--	--	--	0.00222515
222.221					0.000660405	--	--	--	--	0.00258205
222.371					0.000736409	--	--	--	--	0.0023618
222.521					0.000804179	--	--	--	--	0.0022184
222.672					0.000863423	--	--	--	--	0.00215794
222.822					0.000728273	--	--	--	--	0.0018973
222.972					0.000454756	--	--	--	--	0.00206497
223.122					0.000524037	--	--	--	--	0.0019228
223.272					0.000310836	--	--	--	--	0.00195693
223.422					0.000695143	--	--	--	--	0.00197936
223.573					0.000722523	--	--	--	--	0.00200802
223.723					0.000860646	--	--	--	--	0.00170755
223.873					0.000138658	--	--	--	--	0.00193419
224.023					0.000508982	--	--	--	--	0.00163061
224.173					0	--	--	--	--	0.00163754
224.323					0.000185235	--	--	--	--	0.00170431
224.473						--	--	--	--	0.00186072
224.624						--	--	--	--	0.00193454
224.774						--	--	--	--	0.00151705
224.924						--	--	--	--	0.0015755
225.074						--	--	--	--	0.00154908
225.224						--	--	--	--	0.00128436
225.374						--	--	--	--	0.000994807
225.524						--	--	--	--	0.00131744
225.675						--	--	--	--	0.00176275
225.825						--	--	--	--	0.0014526
225.975						--	--	--	--	0.00146803
226.125						--	--	--	--	0.000995158
226.275						--	--	--	--	0.00126298
226.425						--	--	--	--	0.00114066
226.576						--	--	--	--	0.00127591
226.726						--	--	--	--	0.000841858
226.876						--	--	--	--	0.000774255
227.026						--	--	--	--	0.000934915
227.176						--	--	--	--	0.000823193
227.326						--	--	--	--	0.00039129
227.476						--	--	--	--	0.000548664
227.627						--	--	--	--	0.000596507
227.777						--	--	--	--	0.00060768
227.927						--	--	--	--	0.00034625
228.077						--	--	--	--	0.00076374
228.227						--	--	--	--	0.00019777
228.377						--	--	--	--	0.000328769
228.527						--	--	--	--	0.000209731
228.678						--	--	--	--	9.92792e-05
228.828						--	--	--	--	0.000319919
228.978						--	--	--	--	0.000188394
229.128						--	--	--	--	0.000204736
229.278						--	--	--	--	0.000503099
229.428						--	--	--	--	0.000168941
229.579						--	--	--	--	0.00015054
229.729						--	--	--	--	0

## Sheet: SuppFigXX_Q61L_GDIWT_C
	Cdc42WTGDP/XlGDIWT	Cdc42Q61LGTP/XlGDIWT
0	0.0195123	0.0182849
0	0.0190246	0.0164625
0.3125	0.0967522	0.0228655
0.3125	0.106094	0.0260158
0.625	0.145271	0.0292522
0.625	0.134165	0.0301748
1.25	0.198701	0.0245516
1.25	0.199504	0.0359324
2.5	0.22731	0.0488461
2.5	0.239419	0.0488562
5	0.347921	0.0668661
5	0.3524	0.0606964
10	0.393333	0.097358
10	0.429936	0.0977356
20	0.478597	0.123958
20	0.509076	0.128469

## Sheet: SuppFigXX_Q61L_GDIWT_E
	RhoAWTGDP/XlRhoGDIWT	RhoAQ63LGTP/XlRhoGDIWT
0	0.0162858	0.0250445
0	0.0195039	0.0260238
0.3125	0.0540913	0.0326057
0.3125	0.073048	0.0328467
0.625	0.120744	0.0412909
0.625	0.113686	0.0317818
1.25	0.166634	0.0441602
1.25	0.178915	0.0411986
2.5	0.204136	0.0594718
2.5	0.213433	0.0597582
5	0.349985	0.095925
5	0.342502	0.0934555
10	0.412013	0.135164
10	0.444396	0.141994
20	0.536452	0.187076
20	0.563943	0.197487
