# Supplementary material for: Extraction of active RhoGTPases by RhoGDI regulates spatiotemporal patterning of RhoGTPases
Source: eLife. 2019 Oct 24;8:e50471. doi: 10.7554/eLife.50471 (PMC6910828; doi:10.7554/eLife.50471)
Supplement: Figure 7—figure supplement 4—source data 1. [file elife-50471-fig7-figsupp4-data1.xlsx]

## Sheet: SuppFig6_Cdc42
[BtRhoGDIWT]	Cdc42WTGDP	SD	Cdc42Q61LGTP	SD
uM	sec^-1		sec^-1
0	0.0206171	0.00215415	0.0127038	0.00205475
0.3125	0.113175	0.00648436	0.0468254	0.00953084
0.625	0.158158	0.0244423	0.0772043	0.0103066
1.25	0.205972	0.0347142	0.101407	0.0321515
2.5	0.239168	0.0304672	0.155247	0.0251061
5	0.327174	0.0483286	0.209482	0.0155751
10	0.377908	0.0767321	0.218128	0.0569434
20	0.438063	0.0203729	--	--

## Sheet: SuppFig6_RhoA
[BtRhoGDIWT]	RhoAWTGDP	SD	RhoAQ63LGTP	SD
uM	sec^-1		sec^-1
0	0.0202217	0.00571384	0.0254933	0.00119449
0.3125	0.113942	0.00932139	0.0814943	0.00368379
0.625	0.179727	0.0105162	0.120581	0.00519439
1.25	0.277551	0.0310758	0.160397	0.00140432
2.5	0.418423	0.0262793	0.214945	0.0175724
5	0.572159	0.0217483	0.285613	0.0130186
10	0.795099	0.126584	0.354337	0.0193806
20	1.15299	0.13118	0.378398	0.114474
