# Supplementary material for: Extraction of active RhoGTPases by RhoGDI regulates spatiotemporal patterning of RhoGTPases
Source: eLife. 2019 Oct 24;8:e50471. doi: 10.7554/eLife.50471 (PMC6910828; doi:10.7554/eLife.50471)
Supplement: Figure 7—source data 1. [file elife-50471-fig7-data1.xlsx]

## Sheet: Figure7B
Time	Cdc42WTGDP	Cdc42WTGDP	Cdc42WTGDP	Cdc42WTGDP	Cdc42WTGDP	Time	Cdc42G12VGTPgS	Time	Cdc42G12VGTPgS	Time	Cdc42G12VGTPgS	Time	Cdc42G12VGTPgS	Time	Cdc42G12VGTPgS
sec	XlRhoGDIWT/20uM	XlRhoGDIWT/5uM	XlRhoGDIWT/1.25uM	XlRhoGDIWT/0.3125uM	XlRhoGDIWT/0uM	sec	XlRhoGDIWT/20uM	sec	XlRhoGDIWT/5uM	sec	XlRhoGDIWT/1.25uM	sec	XlRhoGDIWT/0.3125uM	sec	XlRhoGDIWT/0uM
0	1	1	1	1	1	0	1	0	1	0	1	0	1	0	1
0.15	0.965604	0.972051	0.981883	0.988795	0.993528	0.0951096	0.989295	0.19706	0.972441	0.182872	0.987662	0.19723	0.991048	0.328358	0.990061
0.3	0.930028	0.937827	0.959567	0.977492	0.990695	0.190219	0.978591	0.39412	0.944883	0.365744	0.975325	0.39446	0.982096	0.656717	0.980121
0.45	0.89734	0.900598	0.936656	0.962564	0.983611	0.285329	0.967886	0.591181	0.917324	0.548617	0.962987	0.59169	0.973145	0.985075	0.970182
0.601	0.864202	0.860826	0.916938	0.945622	0.972756	0.380439	0.957182	0.788241	0.889766	0.731489	0.950649	0.78892	0.964193	1.31343	0.959927
0.751	0.831268	0.824469	0.896644	0.927959	0.964448	0.475548	0.946477	0.985301	0.862207	0.914361	0.938311	0.98615	0.955241	1.64179	0.949656
0.901	0.799563	0.795707	0.873662	0.915527	0.960113	0.570658	0.931594	1.18236	0.829143	1.09723	0.924134	1.18338	0.943376	1.97015	0.939385
1.051	0.76836	0.764914	0.848984	0.903542	0.955375	0.665767	0.915241	1.37942	0.79562	1.28011	0.908336	1.38061	0.931291	2.29851	0.929111
1.201	0.73161	0.735473	0.827635	0.887237	0.951796	0.760877	0.898887	1.57648	0.762096	1.46298	0.892537	1.57784	0.919206	2.62687	0.918837
1.351	0.694702	0.710431	0.802551	0.873401	0.949138	0.855987	0.882534	1.77354	0.728572	1.64585	0.876739	1.77507	0.907121	2.95523	0.908562
1.501	0.657379	0.684023	0.777495	0.859693	0.946452	0.951096	0.866181	1.9706	0.695048	1.82872	0.860941	1.9723	0.895036	3.28358	0.897318
1.652	0.622387	0.655993	0.753011	0.843227	0.938643	1.04621	0.848026	2.16766	0.664218	2.01159	0.845111	2.16953	0.882118	3.61194	0.885922
1.802	0.586002	0.628812	0.734916	0.825363	0.931429	1.14132	0.827915	2.36472	0.633877	2.19447	0.828761	2.36676	0.869064	3.9403	0.874525
1.952	0.551049	0.602307	0.714993	0.810646	0.924394	1.23643	0.807804	2.56178	0.603536	2.37734	0.812411	2.56399	0.856009	4.26866	0.864092
2.102	0.51749	0.579529	0.696203	0.799183	0.920063	1.33153	0.787694	2.75884	0.573196	2.56021	0.796061	2.76122	0.842955	4.59702	0.853873
2.252	0.483376	0.553249	0.678944	0.78505	0.91613	1.42664	0.767583	2.9559	0.542855	2.74308	0.779711	2.95845	0.829901	4.92538	0.843655
2.402	0.447363	0.528344	0.662542	0.774145	0.909903	1.52175	0.747366	3.15296	0.517543	2.92596	0.763361	3.15568	0.817274	5.25373	0.834107
2.553	0.413221	0.505213	0.643773	0.76249	0.907317	1.61686	0.72677	3.35002	0.493742	3.10883	0.747514	3.35291	0.804765	5.58209	0.824756
2.703	0.380953	0.47897	0.624807	0.74811	0.904247	1.71197	0.706175	3.54708	0.46994	3.2917	0.732019	3.55014	0.792256	5.91045	0.815405
2.853	0.35107	0.454543	0.605862	0.734306	0.896665	1.80708	0.685579	3.74414	0.446139	3.47457	0.716523	3.74737	0.779747	6.23881	0.806871
3.003	0.322586	0.430268	0.591845	0.719355	0.888861	1.90219	0.664983	3.9412	0.422337	3.65744	0.701027	3.9446	0.767238	6.56717	0.798648
3.153	0.297126	0.408094	0.577517	0.708389	0.881587	1.9973	0.644388	4.13826	0.402735	3.84032	0.685531	4.14183	0.755221	6.89553	0.790424
3.303	0.272643	0.387255	0.563474	0.698344	0.880092	2.09241	0.625462	4.33533	0.384999	4.02319	0.670248	4.33906	0.743401	7.22388	0.782903
3.453	0.249444	0.366201	0.549383	0.688601	0.876493	2.18752	0.606607	4.53239	0.367262	4.20606	0.656504	4.53629	0.73158	7.55224	0.775713
3.604	0.228035	0.346498	0.53351	0.678825	0.870124	2.28263	0.587753	4.72945	0.349525	4.38893	0.642759	4.73352	0.71976	7.8806	0.768523
3.754	0.20824	0.327782	0.517159	0.669709	0.867037	2.37774	0.568899	4.92651	0.331788	4.57181	0.629015	4.93075	0.70794	8.20896	0.761263
3.904	0.191443	0.308306	0.501645	0.659144	0.863525	2.47285	0.550044	5.12357	0.316656	4.75468	0.615271	5.12798	0.696757	8.53732	0.753963
4.054	0.176512	0.289792	0.487828	0.646985	0.85631	2.56796	0.532965	5.32063	0.303151	4.93755	0.601527	5.32521	0.685927	8.86568	0.746662
4.204	0.162534	0.27115	0.474917	0.634243	0.84943	2.66307	0.51665	5.51769	0.289647	5.12042	0.588763	5.52244	0.675097	9.19403	0.739608
4.354	0.150608	0.256235	0.462437	0.626293	0.843962	2.75818	0.500336	5.71475	0.276142	5.3033	0.576519	5.71967	0.664267	9.52239	0.732727
4.504	0.138633	0.240996	0.449482	0.619264	0.842476	2.85329	0.484022	5.91181	0.262637	5.48617	0.564276	5.9169	0.653437	9.85075	0.725845
4.655	0.127785	0.226845	0.437457	0.610409	0.837997	2.9484	0.467708	6.10887	0.250818	5.66904	0.552033	6.11413	0.643177	10.1791	0.719531
4.805	0.117894	0.213023	0.422639	0.602529	0.834486	3.04351	0.452943	6.30593	0.240445	5.85191	0.53979	6.31136	0.63334	10.5075	0.713695
4.955	0.108044	0.200231	0.408892	0.59505	0.83231	3.13862	0.440162	6.50299	0.230072	6.03478	0.527801	6.50859	0.623504	10.8358	0.707859
5.105	0.100018	0.187492	0.395673	0.585558	0.827267	3.23373	0.427381	6.70005	0.219699	6.21766	0.516977	6.70582	0.613668	11.1642	0.701935
5.255	0.0933299	0.17467	0.382818	0.575028	0.821064	3.32884	0.4146	6.89711	0.209326	6.40053	0.506153	6.90305	0.603831	11.4925	0.695922
5.405	0.0860658	0.163875	0.372514	0.565357	0.813121	3.42395	0.40182	7.09417	0.200045	6.5834	0.495329	7.10028	0.594509	11.8209	0.689909
5.556	0.0801177	0.154229	0.360764	0.559445	0.809925	3.51906	0.389301	7.29123	0.192038	6.76627	0.484505	7.29751	0.585705	12.1493	0.683884
5.706	0.0749336	0.144597	0.350521	0.550919	0.808139	3.61417	0.377994	7.48829	0.18403	6.94915	0.473681	7.49474	0.576901	12.4776	0.677844
5.856	0.0698044	0.135601	0.340404	0.543065	0.804399	3.70928	0.366686	7.68535	0.176022	7.13202	0.464055	7.69197	0.568096	12.806	0.671804
6.006	0.0645563	0.127725	0.32901	0.537386	0.801201	3.80439	0.355379	7.88241	0.168014	7.31489	0.454915	7.8892	0.559292	13.1343	0.666083
6.156	0.060143	0.119621	0.317883	0.530598	0.796853	3.8995	0.344071	8.07947	0.160674	7.49776	0.445776	8.08643	0.550918	13.4627	0.660828
6.306	0.0567807	0.111954	0.306765	0.521981	0.790657	3.9946	0.332764	8.27653	0.154404	7.68063	0.436636	8.28366	0.543118	13.7911	0.655573
6.456	0.0531155	0.104692	0.298222	0.51328	0.785365	4.08971	0.323022	8.47359	0.148133	7.86351	0.427497	8.48089	0.535318	14.1194	0.650248
6.607	0.0497737	0.0983146	0.289123	0.504736	0.778393	4.18482	0.31342	8.67065	0.141862	8.04638	0.418614	8.67812	0.527518	14.4478	0.644798
6.757	0.0469187	0.0925381	0.281097	0.498884	0.778126	4.27993	0.303819	8.86771	0.135591	8.22925	0.410531	8.87535	0.519718	14.7761	0.639347
6.907	0.0446179	0.0869656	0.272244	0.492707	0.774245	4.37504	0.294217	9.06477	0.129729	8.41212	0.402448	9.07258	0.512087	15.1045	0.634156
7.057	0.0421118	0.0820944	0.264035	0.485215	0.768897	4.47015	0.284615	9.26183	0.124786	8.595	0.394365	9.26981	0.504756	15.4328	0.629526
7.207	0.0392286	0.0772524	0.254711	0.479993	0.768566	4.56526	0.275972	9.45889	0.119843	8.77787	0.386282	9.46704	0.497426	15.7612	0.624896
7.357	0.0369141	0.0728801	0.245447	0.47314	0.765719	4.66037	0.267829	9.65595	0.1149	8.96074	0.378199	9.66427	0.490096	16.0896	0.620162
7.507	0.0351063	0.0686215	0.237044	0.465311	0.760978	4.75548	0.259685	9.85301	0.109957	9.14361	0.370778	9.8615	0.482766	16.4179	0.615143
7.658	0.0340651	0.0640578	0.230261	0.457385	0.754076	4.85059	0.251541	10.0501	0.105262	9.32648	0.363554	10.0587	0.475726	16.7463	0.610125
7.808	0.0324424	0.0606909	0.223096	0.449222	0.748663	4.9457	0.243397	10.2471	0.101398	9.50936	0.356331	10.256	0.469404	17.0746	0.60508
7.958	0.0307287	0.0576456	0.215403	0.44503	0.747059	5.04081	0.235639	10.4442	0.0975326	9.69223	0.349108	10.4532	0.463082	17.403	0.599947
8.108	0.0295311	0.0547446	0.209697	0.439001	0.744575	5.13592	0.228465	10.6413	0.0936677	9.8751	0.341885	10.6504	0.45676	17.7314	0.594813
8.258	0.0280389	0.0512706	0.203171	0.432355	0.741542	5.23103	0.221291	10.8383	0.0898029	10.058	0.334888	10.8477	0.450438	18.0597	0.589826
8.408	0.0264399	0.0491292	0.196038	0.427563	0.740703	5.32614	0.214117	11.0354	0.0860527	10.2408	0.328419	11.0449	0.444203	18.3881	0.585531
8.559	0.0253669	0.0463651	0.188324	0.421058	0.738085	5.42125	0.206943	11.2324	0.0829345	10.4237	0.321949	11.2421	0.438289	18.7164	0.581235
8.709	0.0245698	0.0435018	0.183062	0.414747	0.732103	5.51636	0.199964	11.4295	0.0798163	10.6066	0.31548	11.4393	0.432375	19.0448	0.576922
8.859	0.0234265	0.041585	0.178087	0.4073	0.725803	5.61147	0.194209	11.6266	0.0766982	10.7895	0.30901	11.6366	0.426461	19.3731	0.572489
9.009	0.0223659	0.0396231	0.17231	0.401639	0.723296	5.70658	0.188454	11.8236	0.07358	10.9723	0.30254	11.8338	0.420547	19.7015	0.568057
9.159	0.0216421	0.0377261	0.167283	0.397324	0.72173	5.80169	0.182698	12.0207	0.0705167	11.1552	0.296786	12.031	0.414727	20.0299	0.563644
9.309	0.0206072	0.0356291	0.161925	0.390888	0.718407	5.8968	0.176943	12.2177	0.0681111	11.3381	0.291176	12.2283	0.409472	20.3582	0.559441
9.459	0.0197488	0.0343031	0.156461	0.385876	0.715906	5.99191	0.171188	12.4148	0.0657055	11.521	0.285565	12.4255	0.404217	20.6866	0.555237
9.61	0.0190196	0.03294	0.150851	0.381285	0.713919	6.08702	0.166099	12.6119	0.0632999	11.7038	0.279955	12.6227	0.398962	21.0149	0.551047
9.76	0.0179791	0.0312841	0.145601	0.375322	0.710592	6.18213	0.161103	12.8089	0.0608943	11.8867	0.274345	12.82	0.393707	21.3433	0.547164
9.91	0.0174066	0.0295483	0.141008	0.369241	0.706192	6.27724	0.156106	13.006	0.0584887	12.0696	0.268986	13.0172	0.388481	21.6717	0.543281
10.06	0.0170961	0.0282435	0.136798	0.362063	0.700422	6.37235	0.15111	13.203	0.056545	12.2524	0.264065	13.2144	0.383627	22	0.539398
10.21	0.0164648	0.0268902	0.132798	0.358065	0.698129	6.46746	0.146114	13.4001	0.0546015	12.4353	0.259145	13.4116	0.378773	22.3284	0.535445
10.36	0.0161743	0.0261368	0.128249	0.35341	0.697348	6.56256	0.141679	13.5972	0.0526579	12.6182	0.254225	13.6089	0.373918	22.6567	0.53149
10.51	0.0153436	0.0248423	0.124621	0.348721	0.694364	6.65767	0.137591	13.7942	0.0507143	12.8011	0.249304	13.8061	0.369064	22.9851	0.527536
10.661	0.0141664	0.0238282	0.120377	0.343828	0.691316	6.75278	0.133503	13.9913	0.0487708	12.9839	0.244384	14.0033	0.36421	23.3134	0.523924
10.811	0.0141352	0.0227932	0.116029	0.339195	0.689724	6.84789	0.129416	14.1883	0.0471711	13.1668	0.239881	14.2006	0.359707	23.6418	0.52033
10.961	0.0135845	0.0219929	0.112356	0.334365	0.686191	6.943	0.125328	14.3854	0.0456001	13.3497	0.23543	14.3978	0.355203	23.9702	0.516735
11.111	0.0131548	0.0210959	0.108792	0.327979	0.682301	7.03811	0.121459	14.5825	0.044029	13.5325	0.230979	14.595	0.350699	24.2985	0.513493
11.261	0.0125741	0.0202253	0.105991	0.322775	0.677463	7.13322	0.117983	14.7795	0.042458	13.7154	0.226527	14.7923	0.346196	24.6269	0.510288
11.411	0.0124064	0.0195206	0.102659	0.319347	0.676293	7.22833	0.114507	14.9766	0.0408869	13.8983	0.222076	14.9895	0.341692	24.9552	0.507083
11.562	0.0119802	0.0186586	0.100284	0.315216	0.674041	7.32344	0.111031	15.1736	0.0396046	14.0812	0.217828	15.1867	0.337591	25.2836	0.50366
11.712	0.0112903	0.0183506	0.0968509	0.310415	0.673183	7.41855	0.107556	15.3707	0.0383749	14.264	0.213859	15.3839	0.333522	25.612	0.5002
11.862	0.0108027	0.0177416	0.0935279	0.307583	0.671132	7.51366	0.104145	15.5678	0.0371451	14.4469	0.209891	15.5812	0.329453	25.9403	0.49674
12.012	0.010291	0.0168526	0.0904149	0.303825	0.669803	7.60877	0.101344	15.7648	0.0359154	14.6298	0.205922	15.7784	0.325384	26.2687	0.493432
12.162	0.0105066	0.0164282	0.0879864	0.298063	0.665934	7.70388	0.0985439	15.9619	0.0346856	14.8127	0.201953	15.9756	0.321315	26.597	0.490158
12.312	0.00992359	0.0153012	0.0855743	0.292982	0.660409	7.79899	0.0957434	16.1589	0.0336328	14.9955	0.197985	16.1729	0.317434	26.9254	0.486885
12.462	0.00980073	0.0153722	0.0831692	0.287683	0.656654	7.8941	0.0929428	16.356	0.0326332	15.1784	0.194517	16.3701	0.313585	27.2537	0.483374
12.613	0.0097092	0.0144622	0.0807818	0.284185	0.655564	7.98921	0.0901422	16.5531	0.0316336	15.3613	0.191073	16.5673	0.309736	27.5821	0.479792
12.763	0.00929122	0.0139519	0.0780917	0.281359	0.653598	8.08432	0.0876431	16.7501	0.030634	15.5441	0.187629	16.7646	0.305886	27.9105	0.476209
12.913	0.00874508	0.0137829	0.0757426	0.277076	0.651666	8.17943	0.0852031	16.9472	0.0296343	15.727	0.184185	16.9618	0.302037	28.2388	0.472745
13.063	0.00830534	0.0131534	0.0729254	0.273738	0.650538	8.27454	0.0827631	17.1442	0.0287595	15.9099	0.180742	17.159	0.298311	28.5672	0.469328
13.213	0.00802486	0.0128494	0.0704722	0.26913	0.648425	8.36965	0.0803231	17.3413	0.0279401	16.0928	0.177408	17.3562	0.294619	28.8955	0.465911
13.363	0.00788353	0.0120424	0.0686395	0.26479	0.643827	8.46476	0.0778831	17.5384	0.0271207	16.2756	0.174192	17.5535	0.290927	29.2239	0.46274
13.513	0.00761856	0.0114608	0.0668701	0.260214	0.63835	8.55987	0.0757272	17.7354	0.0263013	16.4585	0.170977	17.7507	0.287235	29.5523	0.45969
13.664	0.00738144	0.0114593	0.0651869	0.256286	0.635181	8.65498	0.0737807	17.9325	0.0254819	16.6414	0.167762	17.9479	0.283543	29.8806	0.456639
13.814	0.00724296	0.0110423	0.0629957	0.254053	0.635362	8.75009	0.0718342	18.1295	0.0247423	16.8242	0.164546	18.1452	0.280262	30.209	0.453476
13.964	0.00737157	0.0106885	0.0617015	0.250463	0.634239	8.8452	0.0698877	18.3266	0.0240527	17.0071	0.161336	18.3424	0.277145	30.5373	0.450245
14.114	0.0068269	0.0101677	0.0599445	0.246769	0.631277	8.94031	0.0679412	18.5237	0.023363	17.19	0.158603	18.5396	0.274028	30.8657	0.447015
14.264	0.00640798	0.00991504	0.0576638	0.244226	0.630554	9.03542	0.06606	18.7207	0.0226733	17.3729	0.15587	18.7369	0.270911	31.194	0.44385
14.414	0.00626465	0.00985	0.055627	0.240456	0.628364	9.13053	0.0643208	18.9178	0.0219836	17.5557	0.153137	18.9341	0.267794	31.5224	0.440732
14.564	0.00637056	0.00932521	0.0544354	0.236091	0.623251	9.22563	0.0625815	19.1148	0.0214007	17.7386	0.150404	19.1313	0.264692	31.8508	0.437614
14.715	0.0058253	0.00909271	0.052841	0.232117	0.618639	9.32074	0.0608422	19.3119	0.0209092	17.9215	0.147671	19.3285	0.261598	32.1791	0.434558
14.865	0.00596864	0.00896482	0.0513325	0.229566	0.617173	9.41585	0.059103	19.509	0.0204177	18.1044	0.145029	19.5258	0.258505	32.5075	0.431555
15.015	0.00575125	0.00825587	0.0502242	0.226685	0.618092	9.51096	0.0573869	19.706	0.0199262	18.2872	0.142464	19.723	0.255411	32.8358	0.428552
15.165	0.00528864	0.00827214	0.0488513	0.222981	0.614966	9.60607	0.056067	19.9031	0.0194347	18.4701	0.139899	19.9202	0.252317	33.1642	0.425947
15.315	0.00537374	0.00781525	0.0468573	0.22012	0.612927	9.70118	0.054747	20.1001	0.0189417	18.653	0.137334	20.1175	0.249456	33.4926	0.423753
15.465	0.00503771	0.00808194	0.0455718	0.21728	0.611938	9.79629	0.0534271	20.2972	0.018447	18.8358	0.134768	20.3147	0.246769	33.8209	0.421559
15.616	0.00523467	0.0076307	0.0442038	0.213802	0.610031	9.8914	0.0521072	20.4943	0.0179523	19.0187	0.132231	20.5119	0.244083	34.1493	0.418967
15.766	0.00510307	0.00710498	0.0433191	0.210338	0.605514	9.98651	0.0507872	20.6913	0.0174576	19.2016	0.130039	20.7092	0.241396	34.4776	0.415882
15.916	0.00471961	0.00692744	0.0422836	0.206735	0.601148	10.0816	0.0496246	20.8884	0.0169629	19.3845	0.127848	20.9064	0.23871	34.806	0.412796
16.066	0.00450993	0.00710657	0.0412493	0.204651	0.601432	10.1767	0.0485027	21.0854	0.0164915	19.5673	0.125656	21.1036	0.23608	35.1343	0.409849
16.216	0.00458968	0.00721655	0.0401783	0.201704	0.598627	10.2718	0.0473809	21.2825	0.0160575	19.7502	0.123464	21.3008	0.233508	35.4627	0.407109
16.366	0.00429279	0.00662743	0.0386109	0.199176	0.597953	10.367	0.046259	21.4796	0.0156234	19.9331	0.121273	21.4981	0.230936	35.7911	0.404369
16.516	0.00425911	0.00679111	0.0376274	0.197145	0.597431	10.4621	0.0451371	21.6766	0.0151894	20.1159	0.119194	21.6953	0.228363	36.1194	0.401727
16.667	0.00365384	0.00637526	0.0366585	0.193967	0.595535	10.5572	0.0440848	21.8737	0.0147553	20.2988	0.117191	21.8925	0.225791	36.4478	0.399267
16.817	0.00396153	0.00585601	0.0356093	0.190827	0.591793	10.6523	0.0430933	22.0707	0.0143737	20.4817	0.115189	22.0898	0.22328	36.7761	0.396806
16.967	0.00349666	0.0055662	0.0349172	0.187305	0.589422	10.7474	0.0421018	22.2678	0.01411	20.6646	0.113186	22.287	0.220849	37.1045	0.39425
17.117	0.00341097	0.00591327	0.033747	0.18512	0.58638	10.8425	0.0411103	22.4649	0.0138463	20.8474	0.111183	22.4842	0.218419	37.4329	0.391483
17.267	0.00356133	0.00583875	0.0329174	0.182917	0.585774	10.9376	0.0401187	22.6619	0.0135826	21.0303	0.109211	22.6815	0.215989	37.7612	0.388715
17.417	0.00346331	0.00531961	0.0324455	0.18079	0.58402	11.0327	0.0391795	22.859	0.0133189	21.2132	0.107444	22.8787	0.213559	38.0896	0.386015
17.567	0.0033515	0.00502136	0.0315879	0.178085	0.581769	11.1278	0.0383791	23.056	0.0130609	21.3961	0.105677	23.0759	0.211206	38.4179	0.383504
17.718	0.00303394	0.00516509	0.0307876	0.175876	0.580886	11.2229	0.0375787	23.2531	0.0128222	21.5789	0.10391	23.2731	0.208997	38.7463	0.380993
17.868	0.00276583	0.00526893	0.0293441	0.173597	0.579833	11.318	0.0367783	23.4502	0.0125834	21.7618	0.102143	23.4704	0.206787	39.0746	0.378521
18.018	0.00272262	0.00472929	0.0285576	0.170414	0.576195	11.4132	0.0359779	23.6472	0.0123447	21.9447	0.100376	23.6676	0.204578	39.403	0.376191
18.168	0.00257722	0.00462984	0.0283182	0.167209	0.572264	11.5083	0.0351784	23.8443	0.012106	22.1275	0.098729	23.8648	0.202368	39.7314	0.373861
18.318	0.00314988	0.00472809	0.0271869	0.16507	0.570026	11.6034	0.0344488	24.0413	0.0118571	22.3104	0.0971425	24.0621	0.200185	40.0597	0.371465
18.468	0.00315228	0.00435865	0.026431	0.163592	0.570206	11.6985	0.0337192	24.2384	0.0115527	22.4933	0.095556	24.2593	0.198068	40.3881	0.368747
18.619	0.00238512	0.00470102	0.0265476	0.160946	0.568575	11.7936	0.0329895	24.4355	0.0112484	22.6762	0.0939694	24.4565	0.195951	40.7164	0.366028
18.769	0.00293426	0.0043901	0.0258483	0.159116	0.567412	11.8887	0.0322599	24.6325	0.010944	22.859	0.0923829	24.6538	0.193834	41.0448	0.363379
18.919	0.00237446	0.00389206	0.0245383	0.157107	0.566993	11.9838	0.0315303	24.8296	0.0106396	23.0419	0.0908231	24.851	0.191717	41.3732	0.361217
19.069	0.00221684	0.00400922	0.0240371	0.154986	0.564244	12.0789	0.0309205	25.0266	0.0103432	23.2248	0.0893764	25.0482	0.189617	41.7015	0.359055
19.219	0.00223289	0.00380324	0.0235658	0.151862	0.560289	12.174	0.0303501	25.2237	0.0101417	23.4076	0.0879297	25.2454	0.187581	42.0299	0.356859
19.369	0.00206884	0.0038308	0.0229117	0.149313	0.557021	12.2691	0.0297797	25.4208	0.00994027	23.5905	0.086483	25.4427	0.185544	42.3582	0.354269
19.519	0.00231426	0.00346827	0.0226638	0.14775	0.555155	12.3643	0.0292093	25.6178	0.00973881	23.7734	0.0850362	25.6399	0.183508	42.6866	0.351678
19.67	0.00216906	0.00359162	0.0222347	0.145723	0.55397	12.4594	0.0286389	25.8149	0.00953736	23.9563	0.0835895	25.8371	0.181472	43.0149	0.349102
19.82	0.00195251	0.00335407	0.0217507	0.143995	0.551923	12.5545	0.0280719	26.0119	0.00933591	24.1391	0.0822086	26.0344	0.179463	43.3433	0.346938
19.97	0.00161815	0.00303072	0.0212375	0.142569	0.551076	12.6496	0.0275085	26.209	0.00915133	24.322	0.0808528	26.2316	0.177617	43.6717	0.344775
20.12	0.00164644	0.00313483	0.0202188	0.14048	0.550636	12.7447	0.026945	26.4061	0.00896675	24.5049	0.0794971	26.4288	0.175771	44	0.342612
20.27	0.00115318	0.00291231	0.0194484	0.137838	0.54714	12.8398	0.0263816	26.6031	0.00878217	24.6878	0.0781414	26.6261	0.173925	44.3284	0.340598
20.42	0.00141692	0.00282359	0.0195831	0.135761	0.54354	12.9349	0.0258181	26.8002	0.00859759	24.8706	0.0767856	26.8233	0.172079	44.6567	0.338586
20.57	0.00150138	0.00237662	0.0190162	0.132971	0.539205	13.03	0.0252963	26.9973	0.00841301	25.0535	0.0754819	27.0205	0.17024	44.9851	0.336574
20.721	0.00131552	0.00248572	0.0182989	0.132271	0.538261	13.1251	0.0249115	27.1943	0.00820768	25.2364	0.0743307	27.2177	0.168481	45.3135	0.33443
20.871	0.00161093	0.00285937	0.0180856	0.130171	0.537458	13.2202	0.0245267	27.3914	0.00800062	25.4192	0.0731795	27.415	0.166722	45.6418	0.332277
21.021	0.00115966	0.00259274	0.0176782	0.12818	0.535927	13.3153	0.0241419	27.5884	0.00779356	25.6021	0.0720283	27.6122	0.164962	45.9702	0.330125
21.171	0.00101652	0.00252123	0.0170273	0.127158	0.535884	13.4105	0.0237571	27.7855	0.00758649	25.785	0.070877	27.8094	0.163203	46.2985	0.328094
21.321	0.00136168	0.00240484	0.0166873	0.125003	0.535541	13.5056	0.0233723	27.9826	0.00737943	25.9679	0.0697258	28.0067	0.161444	46.6269	0.326077
21.471	0.000897931	0.00229771	0.016287	0.122593	0.533386	13.6007	0.022972	28.1796	0.00723485	26.1507	0.0686421	28.2039	0.159852	46.9552	0.324059
21.622	0.00103611	0.00214757	0.0157703	0.120106	0.529756	13.6958	0.0225713	28.3767	0.00710165	26.3336	0.0675767	28.4011	0.15826	47.2836	0.321775
21.772	0.000956464	0.00230369	0.0158726	0.118585	0.526793	13.7909	0.0221705	28.5737	0.00696844	26.5165	0.0665113	28.5984	0.156668	47.612	0.319444
21.922	0.000935594	0.00178301	0.0152128	0.117937	0.525168	13.886	0.0217698	28.7708	0.00683524	26.6993	0.0654459	28.7956	0.155076	47.9403	0.317114
22.072	0.000963093	0.00201409	0.0150717	0.116349	0.524177	13.9811	0.021369	28.9679	0.00670203	26.8822	0.0643806	28.9928	0.153484	48.2687	0.315348
22.222	0.000700333	0.00169419	0.0147101	0.114812	0.523216	14.0762	0.0210308	29.1649	0.00655549	27.0651	0.063359	29.19	0.151825	48.597	0.313718
22.372	0.000789164	0.00178088	0.0142273	0.113361	0.522775	14.1713	0.0207179	29.362	0.00640494	27.248	0.062434	29.3873	0.150162	48.9254	0.312088
22.522	0.000631144	0.00161314	0.0139218	0.111679	0.52243	14.2664	0.020405	29.559	0.00625439	27.4308	0.061509	29.5845	0.148498	49.2538	0.310113
22.673	0.000909716	0.00164465	0.0135938	0.109598	0.51828	14.3616	0.0200921	29.7561	0.00610384	27.6137	0.0605839	29.7817	0.146834	49.5821	0.308029
22.823	0.00104397	0.00130426	0.0134129	0.107833	0.514648	14.4567	0.0197792	29.9532	0.00595329	27.7966	0.0596589	29.979	0.14517	49.9105	0.305945
22.973	0.000579535	0.00129615	0.0129205	0.106616	0.513239	14.5518	0.0194631	30.1502	0.00580016	27.9795	0.0587339	30.1762	0.143744	50.2388	0.303935
23.123	0.000858991	0.00135347	0.0129521	0.10559	0.512607	14.6469	0.0191433	30.3473	0.00564588	28.1623	0.0579016	30.3734	0.142358	50.5672	0.301956
23.273	0.000411842	0.00115894	0.0126201	0.103457	0.511227	14.742	0.0188235	30.5443	0.00549161	28.3452	0.0570865	30.5707	0.140971	50.8955	0.299977
23.423	0.000809886	0.00173583	0.0123647	0.102699	0.510247	14.8371	0.0185037	30.7414	0.00533733	28.5281	0.0562715	30.7679	0.139585	51.2239	0.297967
23.573	0.000338971	0.00222582	0.0116857	0.101665	0.509429	14.9322	0.0181839	30.9385	0.00518305	28.7109	0.0554564	30.9651	0.138198	51.5523	0.295941
23.724	0.00043114	0.0025586	0.0113714	0.100036	0.506946	15.0273	0.0178851	31.1355	0.00507698	28.8938	0.0546413	31.1623	0.136902	51.8806	0.293916
23.874	0.000245622	0.00118223	0.0112684	0.098059	0.503811	15.1224	0.0176752	31.3326	0.005001	29.0767	0.0538275	31.3596	0.135631	52.209	0.29188
24.024	0.000278817	0.000852464	0.0115778	0.0961636	0.50059	15.2175	0.0174652	31.5296	0.00492503	29.2596	0.0530158	31.5568	0.13436	52.5373	0.289837
24.174	0.000118588	0.00110633	0.0112852	0.0957789	0.500095	15.3127	0.0172553	31.7267	0.00484905	29.4424	0.0522042	31.754	0.133088	52.8657	0.287794
24.324	0.000382085	0.000732296	0.0111491	0.0943239	0.499158	15.4078	0.0170454	31.9238	0.00477308	29.6253	0.0513925	31.9513	0.131817	53.1941	0.286949
24.474	0	0.000823751	0.0107872	0.0927773	0.497599	15.5029	0.0168354	32.1208	0.00465	29.8082	0.0505809	32.1485	0.130555	53.5224	0.286987
24.625	0.00635107	0.000985071	0.0105648	0.0920831	0.497539	15.598	0.0165701	32.3179	0.00448656	29.991	0.0497692	32.3457	0.129296	53.8508	0.287024
24.775		0.000767968	0.00976952	0.09028	0.496062	15.6931	0.0163007	32.5149	0.00432312	30.1739	0.0490912	32.543	0.128037	54.1791	0.285088
24.925		0.000719364	0.00996577	0.0891371	0.493785	15.7882	0.0160313	32.712	0.00415968	30.3568	0.0484278	32.7402	0.126779	54.5075	0.281404
25.075		0	0.00968755	0.0871073	0.490916	15.8833	0.015762	32.9091	0.00399624	30.5397	0.0477643	32.9374	0.12552	54.8358	0.277721
25.225		0.000256994	0.00958085	0.0862939	0.487295	15.9784	0.0154926	33.1061	0.00387023	30.7225	0.0471009	33.1346	0.124333	55.1642	0.275006
25.375		0.000215623	0.00951045	0.0850105	0.487313	16.0735	0.0152663	33.3032	0.00378794	30.9054	0.0464374	33.3319	0.123187	55.4926	0.27332
25.525		0.000257597	0.00929002	0.0839256	0.486577	16.1686	0.0150613	33.5002	0.00370564	31.0883	0.0457832	33.5291	0.12204	55.8209	0.271634
25.676		0.000570373	0.0088307	0.0830869	0.485478	16.2637	0.0148562	33.6973	0.00362334	31.2712	0.0451408	33.7263	0.120893	56.1493	0.269894
25.826		0.000523906	0.00869426	0.0820051	0.48427	16.3589	0.0146511	33.8944	0.00354105	31.454	0.0444985	33.9236	0.119747	56.4776	0.268083
25.976		4.99741e-05	0.00885271	0.0808692	0.484001	16.454	0.014446	34.0914	0.00347588	31.6369	0.0438562	34.1208	0.118629	56.806	0.266272
26.126		0.000108058	0.00833294	0.0797584	0.481483	16.5491	0.0142419	34.2885	0.00343812	31.8198	0.0432139	34.318	0.117534	57.1344	0.264853
26.276			0.00812586	0.0779621	0.47877	16.6442	0.0140392	34.4855	0.00340035	32.0026	0.0425716	34.5153	0.116438	57.4627	0.264038
26.426			0.00809563	0.076894	0.476395	16.7393	0.0138365	34.6826	0.00336258	32.1855	0.0420093	34.7125	0.115342	57.7911	0.263223
26.576			0.00796845	0.0760809	0.476465	16.8344	0.0136338	34.8797	0.00332481	32.3684	0.0414498	34.9097	0.114246	58.1194	0.262206
26.727			0.0076373	0.0751466	0.475951	16.9295	0.0134311	35.0767	0.00326963	32.5513	0.0408903	35.1069	0.113167	58.4478	0.260812
26.877			0.00762419	0.0743007	0.474327	17.0246	0.0132414	35.2738	0.00317528	32.7341	0.0403309	35.3042	0.112103	58.7761	0.259418
27.027			0.00758729	0.0734124	0.474114	17.1197	0.0131255	35.4708	0.00308093	32.917	0.0397714	35.5014	0.11104	59.1045	0.257989
27.177			0.00706865	0.0724893	0.472363	17.2148	0.0130095	35.6679	0.00298657	33.0999	0.0392279	35.6986	0.109976	59.4329	0.256481
27.327			0.0070364	0.0713381	0.469479	17.31	0.0128935	35.865	0.00289222	33.2827	0.0387006	35.8959	0.108912	59.7612	0.254972
27.477			0.00697669	0.0695717	0.466252	17.4051	0.0127775	36.062	0.00281328	33.4656	0.0381733	36.0931	0.107863	60.0896	0.253266
27.628			0.00688695	0.0686323	0.465792	17.5002	0.0126616	36.2591	0.00278565	33.6485	0.037646	36.2903	0.106832	60.4179	0.250978
27.778			0.00666929	0.0677724	0.464803	17.5953	0.01254	36.4561	0.00275802	33.8314	0.0371187	36.4876	0.105802	60.7463	0.24869
27.928			0.00691926	0.0671308	0.463905	17.6904	0.0124178	36.6532	0.00273039	34.0142	0.036594	36.6848	0.104771	61.0747	0.246433
28.078			0.00627358	0.0661282	0.463196	17.7855	0.0122955	36.8503	0.00270276	34.1971	0.0361785	36.882	0.10374	61.403	0.244294
28.228			0.00656699	0.0656289	0.463004	17.8806	0.0121732	37.0473	0.00267184	34.38	0.0357631	37.0792	0.10276	61.7314	0.242155
28.378			0.00640507	0.0642756	0.460447	17.9757	0.012051	37.2444	0.00262282	34.5629	0.0353476	37.2765	0.10187	62.0597	0.240124
28.528			0.00605557	0.0632793	0.458053	18.0708	0.0118596	37.4414	0.00257379	34.7457	0.0349322	37.4737	0.10098	62.3881	0.238643
28.679			0.00586131	0.0619169	0.455486	18.1659	0.0116278	37.6385	0.00252477	34.9286	0.0345168	37.6709	0.100091	62.7164	0.237161
28.829			0.0060674	0.061747	0.454582	18.2611	0.0113959	37.8356	0.00247575	35.1115	0.0340893	37.8682	0.0992007	63.0448	0.235698
28.979			0.00580932	0.0608966	0.455489	18.3562	0.011164	38.0326	0.00242829	35.2943	0.0336521	38.0654	0.0982924	63.3732	0.23437
29.129			0.00579818	0.0602422	0.454311	18.4513	0.0109321	38.2297	0.00239959	35.4772	0.033215	38.2626	0.0973376	63.7015	0.233042
29.279			0.00574901	0.0595427	0.453399	18.5464	0.0107651	38.4267	0.00237089	35.6601	0.0327778	38.4599	0.0963828	64.0299	0.231691
29.429			0.00538467	0.0585961	0.452682	18.6415	0.0107088	38.6238	0.00234219	35.843	0.0323407	38.6571	0.095428	64.3582	0.230052
29.579			0.00520955	0.0575179	0.449949	18.7366	0.0106525	38.8209	0.00231349	36.0258	0.0319042	38.8543	0.0944732	64.6866	0.228413
29.73			0.0052753	0.0567578	0.448358	18.8317	0.0105962	39.0179	0.00228478	36.2087	0.0314743	39.0515	0.0935376	65.015	0.226779
29.88			0.00539541	0.0559555	0.445426	18.9268	0.0105399	39.215	0.00219024	36.3916	0.0310444	39.2488	0.0926714	65.3433	0.225347
30.03			0.00466786	0.0554029	0.445858	19.0219	0.0104769	39.412	0.00209571	36.5744	0.0306146	39.446	0.0918053	65.6717	0.223915
30.18			0.00523844	0.0545566	0.444296	19.117	0.0103605	39.6091	0.00200118	36.7573	0.0301847	39.6432	0.0909392	66	0.222482
30.33			0.00505719	0.0539252	0.443056	19.2121	0.0102441	39.8062	0.00190665	36.9402	0.0297548	39.8405	0.0900731	66.3284	0.22092
30.48			0.00453618	0.0535396	0.442205	19.3073	0.0101276	40.0032	0.00181211	37.1231	0.0293697	40.0377	0.0892227	66.6567	0.219355
30.63			0.00470808	0.0529015	0.441799	19.4024	0.0100112	40.2003	0.00181149	37.3059	0.0290128	40.2349	0.088469	66.9851	0.21779
30.781			0.00427221	0.0517388	0.438413	19.4975	0.00989472	40.3973	0.00181871	37.4888	0.028656	40.4322	0.0877152	67.3135	0.216765
30.931			0.00457719	0.0507438	0.435356	19.5926	0.00976752	40.5944	0.00182593	37.6717	0.0282991	40.6294	0.0869615	67.6418	0.215777
31.081			0.00412039	0.0501542	0.43246	19.6877	0.00963842	40.7915	0.00183314	37.8546	0.0279422	40.8266	0.0862077	67.9702	0.214789
31.231			0.00403461	0.0496229	0.433253	19.7828	0.00950931	40.9885	0.00184036	38.0374	0.0275896	41.0238	0.0854536	68.2985	0.213341
31.381			0.00380868	0.0489966	0.432582	19.8779	0.00938021	41.1856	0.00177224	38.2203	0.027262	41.2211	0.0846946	68.6269	0.211838
31.531			0.00410871	0.048306	0.432002	19.973	0.00925111	41.3826	0.00169046	38.4032	0.0269344	41.4183	0.0839356	68.9553	0.210334
31.682			0.00377831	0.047835	0.430791	20.0681	0.00918132	41.5797	0.00160867	38.586	0.0266068	41.6155	0.0831765	69.2836	0.209017
31.832			0.00369095	0.0468016	0.429513	20.1632	0.00915291	41.7768	0.00152689	38.7689	0.0262793	41.8128	0.0824175	69.612	0.207735
31.982			0.00355639	0.046145	0.426922	20.2584	0.0091245	41.9738	0.0014451	38.9518	0.0259517	42.01	0.0816585	69.9403	0.206453
32.132			0.00353353	0.0452997	0.423874	20.3535	0.00909608	42.1709	0.00134228	39.1347	0.0256503	42.2072	0.0809169	70.2687	0.204969
32.282			0.00365201	0.0442902	0.42286	20.4486	0.00906767	42.3679	0.00123315	39.3175	0.0253614	42.4045	0.0801754	70.597	0.203435
32.432			0.0035971	0.0444266	0.422657	20.5437	0.00900306	42.565	0.00112401	39.5004	0.0250725	42.6017	0.0794338	70.9254	0.201901
32.582			0.00324627	0.0437617	0.420979	20.6388	0.0088646	42.7621	0.00101488	39.6833	0.0247836	42.7989	0.0786922	71.2538	0.200749
32.733			0.00307555	0.0428622	0.420549	20.7339	0.00872613	42.9591	0.000905743	39.8661	0.0244947	42.9962	0.0779506	71.5821	0.199723
32.883			0.00304151	0.0428484	0.419908	20.829	0.00858767	43.1562	0.000898939	40.049	0.0242046	43.1934	0.0772512	71.9105	0.198697
33.033			0.00309247	0.0418632	0.417743	20.9241	0.0084492	43.3533	0.000937656	40.2319	0.0239098	43.3906	0.0765549	72.2388	0.197505
33.183			0.00258501	0.0413389	0.415227	21.0192	0.00831726	43.5503	0.000976373	40.4148	0.0236149	43.5878	0.0758586	72.5672	0.196244
33.333			0.00300486	0.0401102	0.41194	21.1143	0.00827388	43.7474	0.00101509	40.5976	0.0233201	43.7851	0.0751623	72.8956	0.194982
33.483			0.00285576	0.0397756	0.411283	21.2094	0.0082305	43.9444	0.00105381	40.7805	0.0230253	43.9823	0.074466	73.2239	0.193841
33.633			0.00263883	0.0392798	0.410803	21.3046	0.00818711	44.1415	0.00102595	40.9634	0.0227305	44.1795	0.0737907	73.5523	0.192762
33.784			0.00261212	0.0389708	0.410901	21.3997	0.00814373	44.3386	0.000956501	41.1463	0.0225047	44.3768	0.0731189	73.8806	0.191682
33.934			0.00225965	0.0381418	0.410366	21.4948	0.00810034	44.5356	0.000887055	41.3291	0.0223039	44.574	0.0724471	74.209	0.190465
34.084			0.00243764	0.0379362	0.409813	21.5899	0.00803062	44.7327	0.000817609	41.512	0.0221032	44.7712	0.0717753	74.5373	0.189161
34.234			0.00226727	0.0371855	0.408193	21.685	0.00795466	44.9297	0.000748162	41.6949	0.0219024	44.9685	0.0711035	74.8657	0.187858
34.384			0.00201008	0.0364294	0.405985	21.7801	0.0078787	45.1268	0.000716578	41.8777	0.0217016	45.1657	0.0705403	75.1941	0.18672
34.534			0.00256053	0.0358488	0.403478	21.8752	0.00780273	45.3239	0.000717457	42.0606	0.0214861	45.3629	0.0700069	75.5224	0.185706
34.685			0.00252075	0.0357025	0.402562	21.9703	0.00772677	45.5209	0.000718337	42.2435	0.0212302	45.5601	0.0694735	75.8508	0.184691
34.835			0.00218278	0.0347447	0.402549	22.0654	0.00763673	45.718	0.000719217	42.4264	0.0209743	45.7574	0.0689401	76.1791	0.183539
34.985			0.00237398	0.0343822	0.401692	22.1605	0.00753509	45.915	0.000720097	42.6092	0.0207183	45.9546	0.0684068	76.5075	0.182261
35.135			0.00210214	0.0346862	0.400212	22.2557	0.00743345	46.1121	0.000719944	42.7921	0.0204624	46.1518	0.0678662	76.8359	0.180983
35.285			0.00172989	0.034159	0.400337	22.3508	0.00733181	46.3092	0.000718587	42.975	0.0202065	46.3491	0.0673227	77.1642	0.179715
35.435			0.0018127	0.0338291	0.397326	22.4459	0.00723017	46.5062	0.000717229	43.1579	0.0199689	46.5463	0.0667792	77.4926	0.178457
35.585			0.00176095	0.0328317	0.395338	22.541	0.00713463	46.7033	0.000715872	43.3407	0.019736	46.7435	0.0662357	77.8209	0.177199
35.736			0.00176645	0.0322525	0.393608	22.6361	0.00705417	46.9003	0.000714515	43.5236	0.0195032	46.9408	0.0656922	78.1493	0.176086
35.886			0.00171243	0.03194	0.393679	22.7312	0.0069737	47.0974	0.000700084	43.7065	0.0192703	47.138	0.0650896	78.4776	0.175162
36.036			0.00150911	0.0315201	0.392209	22.8263	0.00689324	47.2945	0.000664736	43.8893	0.0190374	47.3352	0.0644542	78.806	0.174239
36.186			0.00158168	0.0309336	0.39194	22.9214	0.00681277	47.4915	0.000629389	44.0722	0.018837	47.5324	0.0638188	79.1344	0.173218
36.336			0.00173582	0.0307898	0.391015	23.0165	0.00673303	47.6886	0.000594042	44.2551	0.0187042	47.7297	0.0631834	79.4627	0.172043
36.486			0.00126463	0.0301962	0.389664	23.1116	0.00667849	47.8856	0.000558694	44.438	0.0185714	47.9269	0.062548	79.7911	0.170869
36.636			0.00117504	0.0298516	0.388115	23.2068	0.00662395	48.0827	0.000537496	44.6208	0.0184386	48.1241	0.061986	80.1194	0.169754
36.787			0.00153864	0.0292598	0.384813	23.3019	0.00656942	48.2798	0.000548165	44.8037	0.0183058	48.3214	0.0614797	80.4478	0.168755
36.937			0.00102332	0.0287598	0.384458	23.397	0.00651488	48.4768	0.000558833	44.9866	0.018173	48.5186	0.0609733	80.7762	0.167755
37.087			0.00113878	0.0284877	0.383782	23.4921	0.00646034	48.6739	0.000569501	45.1694	0.0179818	48.7158	0.060467	81.1045	0.166799
37.237			0.0012251	0.0282827	0.383113	23.5872	0.00638424	48.8709	0.00058017	45.3523	0.0177807	48.9131	0.0599607	81.4329	0.165945
37.387			0.00125231	0.0275983	0.381629	23.6823	0.0063016	49.068	0.000580666	45.5352	0.0175797	49.1103	0.059451	81.7612	0.165091
37.537			0.00106393	0.0278135	0.381757	23.7774	0.00621897	49.2651	0.000547276	45.7181	0.0173786	49.3075	0.058938	82.0896	0.164169
37.688			0.000978105	0.0271414	0.380323	23.8725	0.00613633	49.4621	0.000513886	45.9009	0.0171775	49.5047	0.058425	82.4179	0.16304
37.838			0.00115941	0.0266614	0.377882	23.9676	0.00605369	49.6592	0.000480496	46.0838	0.0169922	49.702	0.057912	82.7463	0.16191
37.988			0.000768603	0.0258884	0.375166	24.0627	0.00600529	49.8562	0.000447106	46.2667	0.0168318	49.8992	0.057399	83.0747	0.160824
38.138			0.000890841	0.0260515	0.374314	24.1578	0.00599015	50.0533	0.000425949	46.4496	0.0166714	50.0964	0.0569289	83.403	0.159909
38.288			0.00109426	0.0257607	0.374971	24.253	0.00597501	50.2504	0.000472119	46.6324	0.016511	50.2937	0.0565161	83.7314	0.158993
38.438			0.000968458	0.0253692	0.373699	24.3481	0.00595987	50.4474	0.00051829	46.8153	0.0163506	50.4909	0.0561033	84.0597	0.158073
38.588			0.000767514	0.0249653	0.373081	24.4432	0.00594473	50.6445	0.000564461	46.9982	0.0161902	50.6881	0.0556905	84.3881	0.15713
38.739			0.000685495	0.0246616	0.372759	24.5383	0.00591663	50.8415	0.000610631	47.181	0.0160366	50.8854	0.0552777	84.7165	0.156187
38.889			0.000631227	0.0241282	0.370351	24.6334	0.005849	51.0386	0.000650964	47.3639	0.0158835	51.0826	0.0548139	85.0448	0.155243
39.039			0.00055079	0.023575	0.367622	24.7285	0.00578137	51.2357	0.000621442	47.5468	0.0157305	51.2798	0.0542584	85.3732	0.154288
39.189			0.000598429	0.0232947	0.365698	24.8236	0.00571375	51.4327	0.00059192	47.7297	0.0155775	51.477	0.053703	85.7015	0.153334
39.339			0.000542677	0.0233962	0.365249	24.9187	0.00564612	51.6298	0.000562397	47.9125	0.0154244	51.6743	0.0531475	86.0299	0.152397
39.489			0.000174181	0.022664	0.364805	25.0138	0.0055785	51.8268	0.000532875	48.0954	0.015254	51.8715	0.052592	86.3582	0.151695
39.639			0.000351825	0.0229021	0.363188	25.1089	0.00556028	52.0239	0.000503353	48.2783	0.0150618	52.0687	0.0520931	86.6866	0.150992
39.79			4.20488e-05	0.0225841	0.363143	25.2041	0.00554273			48.4611	0.0148697	52.266	0.0517375	87.015	0.150285
39.94			0.000501568	0.0221513	0.36163	25.2992	0.00552517			48.644	0.0146775	52.4632	0.0513819	87.3433	0.14935
40.09			0.000130698	0.0217898	0.359857	25.3943	0.00550762			48.8269	0.0144854	52.6604	0.0510263	87.6717	0.148415
40.24			0.000125404	0.0211038	0.35776	25.4894	0.00549007			49.0098	0.0142933	52.8577	0.0506707	88	0.14748
40.39			0	0.0211335	0.355939	25.5845	0.00539317			49.1926	0.0142017	53.0549	0.0502918	88.3284	0.146694
40.54				0.0205433	0.356337	25.6796	0.00526639			49.3755	0.0141126	53.2521	0.0498261	88.6568	0.14591
40.691				0.0201423	0.355426	25.7747	0.00513961			49.5584	0.0140234	53.4493	0.0493604	88.9851	0.145127
40.841				0.0202215	0.354428	25.8698	0.00501283			49.7413	0.0139343	53.6466	0.0488947	89.3135	0.144137
40.991				0.0205291	0.354734	25.9649	0.00488605			49.9241	0.0138451	53.8438	0.0484291	89.6418	0.143131
41.141				0.0196364	0.354388	26.06	0.00479673			50.107	0.0137227	54.041	0.0479775	89.9702	0.142126
41.291				0.0191058	0.35138	26.1551	0.00475032			50.2899	0.013568	54.2383	0.0476114	90.2985	0.141231
41.441				0.0186308	0.349666	26.2503	0.0047039			50.4727	0.0134133	54.4355	0.0472453	90.6269	0.14035
41.591				0.0185234	0.348742	26.3454	0.00465749			50.6556	0.0132586	54.6327	0.0468792	90.9553	0.139469
41.742				0.0183578	0.348006	26.4405	0.00461107			50.8385	0.013104	54.83	0.0465131	91.2836	0.138579
41.892				0.0181763	0.346392	26.5356	0.00457156			51.0214	0.0129488	55.0272	0.0461501	91.612	0.137687
42.042				0.0177106	0.34626	26.6307	0.00455868			51.2042	0.0127805	55.2244	0.0458277	91.9403	0.136795
42.192				0.0180642	0.345958	26.7258	0.0045458			51.3871	0.0126123	55.4216	0.0455053	92.2687	0.135983
42.342				0.0174403	0.344422	26.8209	0.00453292			51.57	0.012444	55.6189	0.0451829	92.5971	0.13519
42.492				0.0171379	0.34242	26.916	0.00452004			51.7528	0.0122758	55.8161	0.0448606	92.9254	0.134398
42.642				0.016802	0.34062	27.0111	0.00450715			51.9357	0.0121075	56.0133	0.0445382	93.2538	0.133561
42.793				0.0171049	0.339361	27.1062	0.00443146			52.1186	0.0119754	56.2106	0.044215	93.5821	0.13271
42.943				0.0170447	0.339826	27.2014	0.00435215			52.3015	0.0118709	56.4078	0.0438918	93.9105	0.131859
43.093				0.0161828	0.338526	27.2965	0.00427285			52.4843	0.0117664	56.605	0.0435686	94.2388	0.131186
43.243				0.0161821	0.337309	27.3916	0.00419354			52.6672	0.0116619	56.8023	0.0432455	94.5672	0.130589
43.393				0.016012	0.337968	27.4867	0.00411424			52.8501	0.0115575	56.9995	0.0429223	94.8956	0.129992
43.543				0.0153418	0.336106	27.5818	0.00403398			53.033	0.0114549	57.1967	0.0426889	95.2239	0.12924
43.693				0.0151513	0.333835	27.6769	0.00395328			53.2158	0.0113699	57.3939	0.0424627	95.5523	0.128405
43.844				0.0150344	0.330583	27.772	0.00387258			53.3987	0.0112849	57.5912	0.0422364	95.8806	0.12757
43.994				0.0147975	0.329856	27.8671	0.00379188			53.5816	0.0111999	57.7884	0.0420102	96.209	0.126789
44.144				0.0146425	0.330906	27.9622	0.00371119			53.7644	0.0111149	57.9856	0.0417839	96.5374	0.126043
44.294				0.0143132	0.32916	28.0573	0.00367976			53.9473	0.0110299	58.1829	0.0414142	96.8657	0.125298
44.444				0.0143462	0.328662	28.1525	0.00371494			54.1302	0.010914	58.3801	0.0410204	97.1941	0.124591
44.594				0.0141655	0.328105	28.2476	0.00375012			54.3131	0.01078	58.5773	0.0406266	97.5224	0.123914
44.745				0.0135748	0.32575	28.3427	0.0037853			54.4959	0.0106461	58.7746	0.0402328	97.8508	0.123237
44.895				0.0132912	0.323919	28.4378	0.00382049			54.6788	0.0105121	58.9718	0.039839	98.1791	0.122349
45.045				0.0129953	0.323037	28.5329	0.00384826			54.8617	0.0103781	59.169	0.0395072	98.5075	0.121265
45.195				0.0130873	0.323391	28.628	0.00383854			55.0445	0.0102516	59.3662	0.0391923	98.8359	0.120181
45.345				0.0125088	0.32237	28.7231	0.00382881			55.2274	0.0101654	59.5635	0.0388773	99.1642	0.119386
45.495				0.0124824	0.323058	28.8182	0.00381909			55.4103	0.0100792	59.7607	0.0385624	99.4926	0.118915
45.645				0.0127302	0.322161	28.9133	0.00380937			55.5932	0.00999296	59.9579	0.0382474	99.8209	0.118444
45.796				0.0125939	0.321242	29.0084	0.00379965			55.776	0.00990677	60.1552	0.0379401	100.149	0.117849
45.946				0.0121342	0.318165	29.1035	0.00376531			55.9589	0.00982057	60.3524	0.0376358	100.478	0.11709
46.096				0.0114789	0.317094	29.1987	0.00372838			56.1418	0.00971058	60.5496	0.0373315	100.806	0.116331
46.246				0.0113966	0.315627	29.2938	0.00369144			56.3247	0.00958978	60.7469	0.0370272	101.134	0.115562
46.396				0.0115556	0.316022	29.3889	0.00365451			56.5075	0.00946899	60.9441	0.0367229	101.463	0.114779
46.546				0.0113577	0.314181	29.484	0.00361758			56.6904	0.0093482	61.1413	0.0363974	101.791	0.113996
46.696				0.0112978	0.313213	29.5791	0.00356806			56.8733	0.00922741	61.3385	0.0360601	102.119	0.113275
46.847				0.0113247	0.312926	29.6742	0.00351161			57.0561	0.00911885	61.5358	0.0357227	102.448	0.112677
46.997				0.0108387	0.311869	29.7693	0.00345515			57.239	0.00905378	61.733	0.0353853	102.776	0.112078
47.147				0.0102867	0.310299	29.8644	0.00339869			57.4219	0.0089887	61.9302	0.0350479	103.105	0.111436
47.297				0.0103754	0.30771	29.9595	0.00334223			57.6048	0.00892363	62.1275	0.0347708	103.433	0.110686
47.447				0.010473	0.306656	30.0546	0.00327694			57.7876	0.00885856	62.3247	0.0345391	103.761	0.109937
47.597				0.00996022	0.30711	30.1498	0.00319742			57.9705	0.00879348	62.5219	0.0343073	104.09	0.109184
47.748				0.0101749	0.306477	30.2449	0.00311791			58.1534	0.00871721	62.7192	0.0340756	104.418	0.108422
47.898				0.00989018	0.305979	30.34	0.00303839			58.3362	0.00863712	62.9164	0.0338439	104.746	0.107659
48.048				0.00976949	0.306515	30.4351	0.00295887			58.5191	0.00855703	63.1136	0.0336087	105.075	0.10693
48.198				0.00990099	0.303976	30.5302	0.00289367			58.702	0.00847694	63.3108	0.03337	105.403	0.106335
48.348				0.00918636	0.301039	30.6253	0.00293056			58.8849	0.00839685	63.5081	0.0331312	105.731	0.105741
48.498				0.00901567	0.299215	30.7204	0.00296745			59.0677	0.00831884	63.7053	0.0328925	106.06	0.105151
48.648				0.00924191	0.299145	30.8155	0.00300435			59.2506	0.00824628	63.9025	0.0326538	106.388	0.104591
48.799				0.00879573	0.299545	30.9106	0.00304124			59.4335	0.00817372	64.0998	0.0324045	106.716	0.104031
48.949				0.00896592	0.297659	31.0057	0.00307814			59.6164	0.00810116	64.297	0.0321411	107.045	0.103467
49.099				0.00892832	0.298374	31.1009	0.0030134			59.7992	0.00802859	64.4942	0.0318777	107.373	0.102868
49.249				0.00883968	0.298976	31.196	0.00293248			59.9821	0.00795603	64.6915	0.0316143	107.702	0.102268
49.399				0.0082922	0.296	31.2911	0.00285157			60.165	0.00787415	64.8887	0.0313509	108.03	0.101652
49.549				0.00807569	0.29515	31.3862	0.00277065			60.3478	0.00779006	65.0859	0.0311094	108.358	0.100766
49.699				0.0082301	0.292279	31.4813	0.00268974			60.5307	0.00770598	65.2831	0.0309075	108.687	0.0998803
49.85				0.00767821	0.292373	31.5764	0.0026326			60.7136	0.00762189	65.4804	0.0307057	109.015	0.0989989
50				0.00784384	0.29105	31.6715	0.00259114			60.8965	0.0075378	65.6776	0.0305038	109.343	0.0983985
50.15				0.00778541	0.290434	31.7666	0.00254968			61.0793	0.00744896	65.8748	0.030302	109.672	0.097798
50.3				0.00801978	0.289994	31.8617	0.00250822			61.2622	0.00735089	66.0721	0.0301238	110	0.0971976
50.45				0.00761254	0.288508	31.9568	0.00246677			61.4451	0.00725283	66.2693	0.0300051	110.328	0.0967868
50.6				0.00748818	0.287659	32.0519	0.00243124			61.6279	0.00715477	66.4665	0.0298864	110.657	0.0963819
50.751				0.00695554	0.285874	32.1471	0.00240712			61.8108	0.0070567	66.6638	0.0297677	110.985	0.095977
50.901				0.00673768	0.284613	32.2422	0.00238299			61.9937	0.00695864	66.861	0.029649	111.313	0.0953235
51.051				0.00694468	0.283983	32.3373	0.00235886			62.1766	0.00693566	67.0582	0.0295102	111.642	0.0946497
51.201				0.0070167	0.28453	32.4324	0.00233474			62.3594	0.00692419	67.2554	0.0292978	111.97	0.0939758
51.351				0.00678128	0.283583	32.5275	0.00231218			62.5423	0.00691273	67.4527	0.0290854	112.299	0.0933592
51.501				0.00664016	0.28367	32.6226	0.00230715			62.7252	0.00690126	67.6499	0.0288729	112.627	0.0927504
51.651				0.00666849	0.282603	32.7177	0.00230211			62.9081	0.00688979	67.8471	0.0286605	112.955	0.0921416
51.802				0.00631278	0.280855	32.8128	0.00229708			63.0909	0.00684144	68.0444	0.0284364	113.284	0.0916459
51.952				0.0059785	0.279374	32.9079	0.00229205			63.2738	0.00673746	68.2416	0.0281425	113.612	0.0911727
52.102				0.00655569	0.278546	33.003	0.00228701			63.4567	0.00663349	68.4388	0.0278486	113.94	0.0906996
52.252				0.00604681	0.27779	33.0982	0.0022291			63.6395	0.00652951	68.6361	0.0275548	114.269	0.0902313
52.402				0.00571585	0.277817	33.1933	0.00215972			63.8224	0.00642554	68.8333	0.0272609	114.597	0.0897643
52.552				0.00614715	0.277806	33.2884	0.00209034			64.0053	0.00632157	69.0305	0.026976	114.925	0.0892973
52.702				0.00602622	0.277628	33.3835	0.00202096			64.1882	0.0062256	69.2277	0.0268139	115.254	0.0889239
52.853				0.00539973	0.276261	33.4786	0.00195158			64.371	0.00613022	69.425	0.0266517	115.582	0.0885835
53.003				0.00572195	0.274396	33.5737	0.00187122			64.5539	0.00603485	69.6222	0.0264895	115.911	0.0882431
53.153				0.00556347	0.271084	33.6688	0.00178228			64.7368	0.00593948	69.8194	0.0263273	116.239	0.0876928
53.303				0.00525608	0.272084	33.7639	0.00169334			64.9196	0.00584411	70.0167	0.0261651	116.567	0.0870499
53.453				0.00528356	0.271088	33.859	0.00160439			65.1025	0.00574928	70.2139	0.0260405	116.896	0.0864069
53.603				0.00510583	0.270474	33.9541	0.00151545			65.2854	0.0056551	70.4111	0.025916	117.224	0.0858193
53.754				0.00526863	0.270049	34.0492	0.00146219			65.4683	0.00556091	70.6084	0.0257915	117.552	0.0852618
53.904				0.00507403	0.270596	34.1444	0.00149171			65.6511	0.00546673	70.8056	0.025667	117.881	0.0847042
54.054				0.00462478	0.268942	34.2395	0.00152123			65.834	0.00537254	71.0028	0.0255425	118.209	0.0842697
54.204				0.00442135	0.267507	34.3346	0.00155075			66.0169	0.00527836	71.2	0.0253291	118.537	0.0839163
54.354				0.00460092	0.264978	34.4297	0.00158027			66.1998	0.00524748	71.3973	0.0251089	118.866	0.0835629
54.504				0.0043345	0.265873	34.5248	0.00160778			66.3826	0.00521735	71.5945	0.0248886	119.194	0.0830592
54.654				0.00425503	0.265484	34.6199	0.00158808			66.5655	0.00518721	71.7917	0.0246683	119.522	0.0824362
54.805				0.00454224	0.26521	34.715	0.00156838			66.7484	0.00515708	71.989	0.024448	119.851	0.0818131
54.955				0.00443033	0.26505	34.8101	0.00154868			66.9312	0.00512695	72.1862	0.0242606	120.179	0.081221
55.105				0.00432021	0.262935	34.9052	0.00152898			67.1141	0.00508816	72.3834	0.0240785	120.508	0.0806583
55.255				0.00385696	0.261613	35.0003	0.00150928			67.297	0.00504138	72.5807	0.0238964	120.836	0.0800956
55.405				0.00377735	0.259335	35.0955	0.00145729			67.4799	0.00499461	72.7779	0.0237144	121.164	0.0795515
55.555				0.00370984	0.258512	35.1906	0.00139624			67.6627	0.00494784	72.9751	0.0235323	121.493	0.0790287
55.705				0.00336926	0.258942	35.2857	0.00133518			67.8456	0.00490106	73.1723	0.0234	121.821	0.0785058
55.856				0.00354555	0.25802	35.3808	0.00127413			68.0285	0.0048534	73.3696	0.0232815	122.149	0.0780534
56.006				0.00370339	0.257685	35.4759	0.00121308			68.2113	0.00478947	73.5668	0.0231629	122.478	0.0776978
56.156				0.00382705	0.257834	35.571	0.0011663			68.3942	0.00472553	73.764	0.0230444	122.806	0.0773421
56.306				0.0035518	0.256697	35.6661	0.00113267			68.5771	0.0046616	73.9613	0.0229259	123.134	0.0768725
56.456				0.00302903	0.254814	35.7612	0.00109905			68.76	0.00459767	74.1585	0.0227485	123.463	0.0762136
56.606				0.00300289	0.253605	35.8563	0.00106542			68.9428	0.00453373	74.3557	0.0225473	123.791	0.0755548
56.756				0.0029581	0.25277	35.9514	0.00103179			69.1257	0.00446934	74.553	0.0223461	124.119	0.0750282
56.907				0.00291936	0.252675	36.0466	0.000999879			69.3086	0.0044046	74.7502	0.022145	124.448	0.0747698
57.057				0.00285994	0.251622	36.1417	0.000972836			69.4915	0.00433986	74.9474	0.0219438	124.776	0.0745114
57.207				0.00282774	0.251473	36.2368	0.000945792			69.6743	0.00427513	75.1446	0.0217456	125.105	0.0741793
57.357				0.00280205	0.251668	36.3319	0.000918748			69.8572	0.00421039	75.3419	0.0215491	125.433	0.0736623
57.507				0.00266976	0.250284	36.427	0.000891704			70.0401	0.00414685	75.5391	0.0213526	125.761	0.0731453
57.657				0.00259163	0.248195	36.5221	0.00086466			70.2229	0.00409302	75.7363	0.021156	126.09	0.07266
57.808				0.00242794	0.246722					70.4058	0.00403919	75.9336	0.0209595	126.418	0.0722775
57.958				0.00263712	0.246452					70.5887	0.00398537	76.1308	0.0208047	126.746	0.0718949
58.108				0.00288042	0.246521					70.7716	0.00393154	76.328	0.0206811	127.075	0.0714719
58.258				0.00250775	0.24586					70.9544	0.00387771	76.5253	0.0205576	127.403	0.0708773
58.408				0.00250091	0.245867					71.1373	0.00383571	76.7225	0.020434	127.731	0.0702827
58.558				0.00227576	0.245618					71.3202	0.00380033	76.9197	0.0203104	128.06	0.0697411
58.708				0.00225993	0.243994					71.503	0.00376496	77.1169	0.0201995	128.388	0.0695109
58.859				0.00203339	0.242719					71.6859	0.00372958	77.3142	0.0201013	128.716	0.0692807
59.009				0.00187655	0.240987					71.8688	0.0036942	77.5114	0.0200032	129.045	0.0690374
59.159				0.00202675	0.241889					72.0517	0.00365487	77.7086	0.019905	129.373	0.0686761
59.309				0.00210214	0.24135					72.2345	0.00359595	77.9059	0.0198068	129.702	0.0683148
59.459				0.00199877	0.240373					72.4174	0.00353703	78.1031	0.0196492	130.03	0.0679403
59.609				0.00205953	0.240116					72.6003	0.0034781	78.3003	0.0194114	130.358	0.0673354
59.759				0.00156633	0.239385					72.7832	0.00341918	78.4976	0.0191736	130.687	0.0667305
59.91				0.00143389	0.23781					72.966	0.00336026	78.6948	0.0189359	131.015	0.0661292
60.06				0.00121642	0.236849					73.1489	0.00330492	78.892	0.0186981	131.343	0.0659263
60.21				0.00113379	0.236199					73.3318	0.00325111	79.0892	0.0184899	131.672	0.0657233
60.36				0.00113547	0.235619					73.5146	0.00319731	79.2865	0.0183353	132	0.0655204
60.51				0.00184272	0.234947					73.6975	0.0031435	79.4837	0.0181806	132.328	0.0649826
60.66				0.00156866	0.23453					73.8804	0.00308969	79.6809	0.018026	132.657	0.0644323
60.811				0.00115273	0.234505					74.0633	0.00303731	79.8782	0.0178713	132.985	0.0638819
60.961				0.00121757	0.234033					74.2461	0.00298963	80.0754	0.0177497	133.313	0.0635328
61.111				0.000909231	0.232256					74.429	0.00294195	80.2726	0.0177106	133.642	0.0632016
61.261				0.000860074	0.230275					74.6119	0.00289427	80.4699	0.0176714	133.97	0.0628704
61.411				0.00111201	0.229665					74.7947	0.0028466	80.6671	0.0176322	134.299	0.0623383
61.561				0.000832941	0.230197					74.9776	0.00279892	80.8643	0.0175931	134.627	0.0617769
61.711				0.00074797	0.230503					75.1605	0.00273255	81.0615	0.0175281	134.955	0.0612155
61.862				0.000828228	0.230121					75.3434	0.00266036	81.2588	0.0173663	135.284	0.0608571
62.012				0.00105308	0.22956					75.5262	0.00258817	81.456	0.0172045	135.612	0.0605412
62.162				0.000758337	0.2286					75.7091	0.00251599	81.6532	0.0170426	135.94	0.0602253
62.312				0.000397125	0.228401					75.892	0.0024438	81.8505	0.0168808	136.269	0.0598769
62.462				0.000167015	0.226838					76.0749	0.00237937	82.0477	0.0167282	136.597	0.0595194
62.612				5.00499e-05	0.226953					76.2577	0.00233402	82.2449	0.0166317	136.925	0.0591619
62.762				0.00044534	0.226539					76.4406	0.00228866	82.4422	0.0165353	137.254	0.0589445
62.913				0.000428028	0.225726					76.6235	0.00224331	82.6394	0.0164388	137.582	0.058778
63.063				0.000381698	0.225503					76.8063	0.00219795	82.8366	0.0163423	137.911	0.0586115
63.213				0.000444	0.22445					76.9892	0.0021526	83.0338	0.0162438	138.239	0.0583475
63.363				0	0.223774					77.1721	0.00212225	83.2311	0.0161171	138.567	0.0580392
63.513					0.223138					77.355	0.00209517	83.4283	0.0159904	138.896	0.0577309
63.663					0.221814					77.5378	0.0020681	83.6255	0.0158637	139.224	0.0574026
63.814					0.222918					77.7207	0.00204102	83.8228	0.015737	139.552	0.057063
63.964					0.222082					77.9036	0.00201395	84.02	0.0156104	139.881	0.0567235
64.114					0.221674					78.0864	0.00197545	84.2172	0.0155231	140.209	0.0562936
64.264					0.220871					78.2693	0.00191597	84.4145	0.0154358	140.537	0.0558026
64.414					0.220725					78.4522	0.00185649	84.6117	0.0153485	140.866	0.0553117
64.564					0.219179					78.6351	0.00179701	84.8089	0.0152612	141.194	0.0549351
64.714					0.217642					78.8179	0.00173753	85.0062	0.0151739	141.522	0.0546514
64.865					0.216995					79.0008	0.00167804	85.2034	0.0150057	141.851	0.0543678
65.015					0.217306					79.1837	0.00164224	85.4006	0.0148309	142.179	0.054111
65.165					0.215969					79.3666	0.0016097	85.5978	0.014656	142.508	0.0538804
65.315					0.21682					79.5494	0.00157717	85.7951	0.0144812	142.836	0.0536498
65.465					0.216599					79.7323	0.00154463	85.9923	0.0143063	143.164	0.0533699
65.615					0.215449					79.9152	0.0015121	86.1895	0.0142253	143.493	0.053032
65.765					0.214788					80.098	0.00148706	86.3868	0.0141601	143.821	0.0526942
65.916					0.213428					80.2809	0.00147279	86.584	0.014095	144.149	0.0524365
66.066					0.212602					80.4638	0.00145853	86.7812	0.0140299	144.478	0.0522916
66.216					0.212847					80.6467	0.00144426	86.9785	0.0139648	144.806	0.0521467
66.366					0.212488					80.8295	0.00143	87.1757	0.0139122	145.134	0.0519468
66.516					0.212486					81.0124	0.00141573	87.3729	0.0138631	145.463	0.051653
66.666					0.211932					81.1953	0.00139553	87.5701	0.0138139	145.791	0.0513592
66.817					0.211006					81.3781	0.00137496	87.7674	0.0137648	146.119	0.0510229
66.967					0.209887					81.561	0.00135439	87.9646	0.0137156	146.448	0.050598
67.117					0.208577					81.7439	0.00133382	88.1618	0.0136251	146.776	0.0501732
67.267					0.208538					81.9268	0.00131325	88.3591	0.0135179	147.105	0.0498296
67.417					0.208404					82.1096	0.00128281	88.5563	0.0134107	147.433	0.049696
67.567					0.207541					82.2925	0.0012414	88.7535	0.0133035	147.761	0.0495625
67.717					0.207261					82.4754	0.00119999	88.9508	0.0131964	148.09	0.0493194
67.868					0.206649					82.6583	0.00115859	89.148	0.0131453	148.418	0.0487103
68.018					0.206624					82.8411	0.00111718	89.3452	0.0131259	148.746	0.0481012
68.168					0.205252					83.024	0.00107577	89.5424	0.0131065	149.075	0.0475767
68.318					0.204136							89.7397	0.0130872	149.403	0.0474254
68.468					0.204313							89.9369	0.0130678	149.731	0.047274
68.618					0.204045							90.1341	0.0129973	150.06	0.0471087
68.768					0.203701							90.3314	0.0128879	150.388	0.0468568
68.919					0.203615							90.5286	0.0127785	150.716	0.0466049
69.069					0.202871							90.7258	0.0126691	151.045	0.0463538
69.219					0.201893							90.9231	0.0125597	151.373	0.0461105
69.369					0.200387							91.1203	0.0124061	151.702	0.0458672
69.519					0.200093							91.3175	0.0122079	152.03	0.0456278
69.669					0.200102							91.5147	0.0120096	152.358	0.0454655
69.82					0.200036							91.712	0.0118114	152.687	0.0453032
69.97					0.199601							91.9092	0.0116132	153.015	0.0451407
70.12					0.199849							92.1064	0.0114078	153.343	0.0448995
70.27					0.198333							92.3037	0.0111925	153.672	0.0446583
70.42					0.197387							92.5009	0.0109773	154	0.0444171
70.57					0.196394							92.6981	0.0107621	154.328	0.0440936
70.72					0.196265							92.8954	0.0105469	154.657	0.0437664
70.871					0.195702							93.0926	0.0103912	154.985	0.0434392
71.021					0.195671							93.2898	0.0103423	155.314	0.0432218
71.171					0.195754							93.487	0.0102934	155.642	0.043015
71.321					0.196066							93.6843	0.0102446	155.97	0.0428082
71.471					0.194162							93.8815	0.0101957	156.299	0.0426044
71.621					0.192778							94.0787	0.0101352	156.627	0.042401
71.771					0.191424							94.276	0.0100453	156.955	0.0421976
71.922					0.192077							94.4732	0.00995541	157.284	0.0419857
72.072					0.191261							94.6704	0.00986553	157.612	0.041772
72.222					0.191226							94.8677	0.00977564	157.94	0.0415584
72.372					0.191276							95.0649	0.00968463	158.269	0.0413272
72.522					0.190751							95.2621	0.0095894	158.597	0.041091
72.672					0.189915							95.4593	0.00949417	158.925	0.0408547
72.822					0.188091							95.6566	0.00939895	159.254	0.0405421
72.973					0.187287							95.8538	0.00930372	159.582	0.0402008
73.123					0.187701							96.051	0.00921475	159.911	0.0398595
73.273					0.187134							96.2483	0.00916354	160.239	0.0397674
73.423					0.18735							96.4455	0.00911234	160.567	0.0397916
73.573					0.187185							96.6427	0.00906113	160.896	0.0398158
73.723					0.186428							96.84	0.00900992	161.224	0.0395447
73.874					0.185206							97.0372	0.00895137	161.552	0.0391049
74.024					0.184243							97.2344	0.00879809	161.881	0.038665
74.174					0.18368							97.4316	0.0086448	162.209	0.0384001
74.324					0.184477							97.6289	0.00849152	162.537	0.0382563
74.474					0.183223							97.8261	0.00833823	162.866	0.0381125
74.624					0.183394							98.0233	0.00818494	163.194	0.0379584
74.774					0.183367							98.2206	0.0081887	163.522	0.0377957
74.925					0.182877							98.4178	0.00819299	163.851	0.037633
75.075					0.18102							98.615	0.00819728	164.179	0.0374437
75.225					0.180119							98.8123	0.00820156	164.508	0.037228
75.375					0.180205							99.0095	0.00820585	164.836	0.0370122
75.525					0.180042							99.2067	0.00823585	165.164	0.0368787
75.675					0.180171							99.4039	0.0082679	165.493	0.0368441
75.825					0.179702							99.6012	0.00829994	165.821	0.0368094
75.976					0.178965							99.7984	0.00833199	166.149	0.0366979
76.126					0.178101							99.9956	0.00836403	166.478	0.0364752
76.276					0.17718							100.193	0.00831492	166.806	0.0362525
76.426					0.176152							100.39	0.00825217	167.134	0.0360085
76.576					0.176305							100.587	0.00818942	167.463	0.0357271
76.726					0.175682							100.785	0.00812667	167.791	0.0354457
76.877					0.175742							100.982	0.00806393	168.119	0.0351713
77.027					0.175098							101.179	0.00802567	168.448	0.0349121
77.177					0.174605							101.376	0.00799409	168.776	0.0346528
77.327					0.174083							101.573	0.0079625	169.105	0.0344233
77.477					0.172495							101.771	0.00793092	169.433	0.0342731
77.627					0.171844							101.968	0.00789933	169.761	0.0341229
77.777					0.172055							102.165	0.00778988	170.09	0.0339448
77.928					0.171624							102.362	0.00764874	170.418	0.0336702
78.078					0.171061							102.56	0.00750759	170.746	0.0333956
78.228					0.171317							102.757	0.00736645	171.075	0.033127
78.378					0.171222							102.954	0.0072253	171.403	0.0328859
78.528					0.170585							103.151	0.00720068	171.731	0.0326448
78.678					0.168608							103.349	0.00724148	172.06	0.03241
78.828					0.168302							103.546	0.00728227	172.388	0.032216
78.979					0.168527							103.743	0.00732307	172.716	0.0320219
79.129					0.168137							103.94	0.00736387	173.045	0.0318441
79.279					0.167581							104.137	0.00734599	173.373	0.0318345
79.429					0.167338							104.335	0.0072839	173.702	0.0318248
79.579					0.166751							104.532	0.0072218	174.03	0.0318008
79.729					0.16601							104.729	0.0071597	174.358	0.0314545
79.88					0.164176							104.926	0.0070976	174.687	0.0311082
80.03					0.163849							105.124	0.0070561	175.015	0.0307619
80.18					0.16422							105.321	0.0070352	175.343	0.0307332
80.33					0.164255							105.518	0.00701429	175.672	0.0307054
80.48					0.163789							105.715	0.00699339	176	0.0306776
80.63					0.16423							105.913	0.00697249	176.328	0.0304307
80.78					0.162785							106.11	0.00693502	176.657	0.0301727
80.931					0.161261							106.307	0.00687512	176.985	0.0299146
81.081					0.160834							106.504	0.00681521	177.314	0.0299366
81.231					0.161357							106.701	0.00675531	177.642	0.0299876
81.381					0.160827							106.899	0.00669541	177.97	0.0300387
81.531					0.160536							107.096	0.00660668	178.299	0.0298727
81.681					0.160527							107.293	0.00646547	178.627	0.0296715
81.831					0.159707							107.49	0.00632426	178.955	0.0294703
81.982					0.159044							107.688	0.00618306	179.284	0.0291606
82.132					0.158205							107.885	0.00604185	179.612	0.0288262
82.282					0.157495							108.082	0.00590248	179.94	0.0284919
82.432					0.157645							108.279	0.00576776	180.269	0.0283091
82.582					0.15809							108.477	0.00563304	180.597	0.0281717
82.732					0.157258							108.674	0.00549832	180.925	0.0280343
82.883					0.157518							108.871	0.0053636	181.254	0.0279216
83.033					0.156962							109.068	0.00522871	181.582	0.0278184
83.183					0.155414							109.265	0.00509322	181.911	0.0277152
83.333					0.153941							109.463	0.00495772	182.239	0.0276025
83.483					0.154029							109.66	0.00482222	182.567	0.0274852
83.633					0.154163							109.857	0.00468673	182.896	0.0273678
83.783					0.153348							110.054	0.00456434	183.224	0.027117
83.934					0.154108							110.252	0.00452328	183.552	0.026788
84.084					0.15417							110.449	0.00448223	183.881	0.0264589
84.234					0.153244							110.646	0.00444117	184.209	0.0262466
84.384					0.152149							110.843	0.00440012	184.537	0.0261173
84.534					0.150882							111.041	0.00436303	184.866	0.0259879
84.684					0.15112							111.238	0.00437983	185.194	0.0258592
84.834					0.151529							111.435	0.00439662	185.522	0.0257309
84.985					0.151256							111.632	0.00441342	185.851	0.0256027
85.135					0.150922							111.829	0.00443021	186.179	0.0255309
85.285					0.151217							112.027	0.00444701	186.508	0.0255167
85.435					0.150388							112.224	0.00432782	186.836	0.0255026
85.585					0.149414							112.421	0.0042084	187.164	0.0253531
85.735					0.148627							112.618	0.00408898	187.493	0.0250368
85.885					0.148632							112.816	0.00396956	187.821	0.0247206
86.036					0.148581							113.013	0.00385014	188.149	0.0244752
86.186					0.14816							113.21	0.00381207	188.478	0.0243345
86.336					0.147728							113.407	0.0037803	188.806	0.0241938
86.486					0.148418							113.605	0.00374853	189.134	0.0240952
86.636					0.147107							113.802	0.00371677	189.463	0.024072
86.786					0.145509							113.999	0.003685	189.791	0.0240487
86.937					0.145139							114.196	0.00356315	190.119	0.0239991
87.087					0.14584							114.393	0.00342576	190.448	0.0238911
87.237					0.145237							114.591	0.00328837	190.776	0.0237832
87.387					0.144843							114.788	0.00315098	191.105	0.0236644
87.537					0.145023							114.985	0.00301359	191.433	0.0235152
87.687					0.144679							115.182	0.00296882	191.761	0.023366
87.837					0.143242							115.38	0.0029498	192.09	0.0232575
87.988					0.142455							115.577	0.00293077	192.418	0.0232948
88.138					0.141956							115.774	0.00291174	192.746	0.023332
88.288					0.142588							115.971	0.00289271	193.075	0.0233403
88.438					0.142354							116.168	0.00285469	193.403	0.0232099
88.588					0.142007							116.366	0.002809	193.731	0.0230796
88.738					0.142193							116.563	0.0027633	194.06	0.0229274
88.888					0.141519							116.76	0.00271761	194.388	0.0226257
89.039					0.140975							116.957	0.00267192	194.717	0.0223239
89.189					0.139464							117.155	0.00264974	195.045	0.0220482
89.339					0.139204							117.352	0.00264067	195.373	0.022066
89.489					0.139165							117.549	0.00263159	195.702	0.0220838
89.639					0.138657							117.746	0.00262252	196.03	0.022102
89.789					0.13877							117.944	0.00261344	196.358	0.0221315
89.94					0.138752							118.141	0.00256741	196.687	0.0221609
90.09					0.137362							118.338	0.00249313	197.015	0.0221903
90.24					0.137							118.535	0.00241885	197.343	0.0219989
90.39					0.136271							118.732	0.00234456	197.672	0.0218054
90.54					0.136182							118.93	0.00227028	198	0.0216119
90.69					0.136207							119.127	0.00223878	198.328	0.021495
90.84					0.135587							119.324	0.00225065	198.657	0.0213824
90.991					0.135839							119.521	0.00226252	198.985	0.0212699
91.141					0.13538							119.719	0.00227439	199.314	0.0211739
91.291					0.135042							119.916	0.00228626	199.642	0.0210798
91.441					0.134228							120.113	0.00227728	199.97	0.0209857
91.591					0.133088							120.31	0.00224025	200.299	0.0207021
91.741					0.132778							120.508	0.00220322	200.627	0.0203862
91.891					0.132783							120.705	0.00216619	200.955	0.0200704
92.042					0.132766							120.902	0.00212916	201.284	0.0200033
92.192					0.132961							121.099	0.00205133	201.612	0.019995
92.342					0.132345							121.296	0.00189973	201.94	0.0199866
92.492					0.131099							121.494	0.00174813	202.269	0.0197044
92.642					0.1308							121.691	0.00159653	202.597	0.019336
92.792					0.130251							121.888	0.00144494	202.925	0.0189677
92.943					0.130364							122.085	0.00135535	203.254	0.0190209
93.093					0.130323							122.283	0.00142059	203.582	0.0192421
93.243					0.1301							122.48	0.00148584	203.911	0.0194632
93.393					0.12967							122.677	0.00155109	204.239	0.0194944
93.543					0.128839							122.874	0.00161634	204.567	0.0194318
93.693					0.12811							123.072	0.00163247	204.896	0.0193692
93.843					0.127869							123.269	0.00146458	205.224	0.0191475
93.994					0.127868							123.466	0.00129668	205.552	0.01883
94.144					0.128077							123.663	0.00112879	205.881	0.0185125
94.294					0.127438							123.86	0.000960899	206.209	0.0183728
94.444					0.12687							124.058	0.000806576	206.537	0.0183625
94.594					0.127219							124.255	0.000735305	206.866	0.0183521
94.744					0.126257							124.452	0.000664034	207.194	0.0182361
94.894					0.12504							124.649	0.000592763	207.522	0.0180275
95.045					0.124693							124.847	0.000521492	207.851	0.0178189
95.195					0.125156							125.044	0.000455817	208.179	0.0177949
95.345					0.124717							125.241	0.00046425	208.508	0.0179644
95.495					0.124599							125.438	0.000472682	208.836	0.0181339
95.645					0.124661							125.636	0.000481115	209.164	0.0181331
95.795					0.124328							125.833	0.000489547	209.493	0.0179174
95.946					0.123981							126.03	0.000497979	209.821	0.0177018
96.096					0.122564									210.149	0.0175916
96.246					0.122275									210.478	0.0176416
96.396					0.122322									210.806	0.0176916
96.546					0.122081									211.134	0.017685
96.696					0.121821									211.463	0.0175739
96.846					0.121671									211.791	0.0174628
96.997					0.121463									212.119	0.0173516
97.147					0.120208									212.448	0.0172399
97.297					0.119596									212.776	0.0171282
97.447					0.119862									213.105	0.0169866
97.597					0.119423									213.433	0.0167586
97.747					0.119628									213.761	0.0165306
97.897					0.119508									214.09	0.0163175
98.048					0.119361									214.418	0.0161597
98.198					0.119275									214.746	0.0160018
98.348					0.117662									215.075	0.0158506
98.498					0.117156									215.403	0.0157324
98.648					0.116878									215.731	0.0156143
98.798					0.116374									216.06	0.0155068
98.948					0.116962									216.388	0.0154768
99.099					0.116638									216.717	0.0154469
99.249					0.116021									217.045	0.0154289
99.399					0.115455									217.373	0.0155574
99.549					0.114558									217.702	0.015686
99.699					0.113788									218.03	0.0157997
99.849					0.114765									218.358	0.0154407
100					0.114038									218.687	0.0150818
100.15					0.114058									219.015	0.0147228
100.3					0.113625									219.343	0.0149688
100.45					0.113506									219.672	0.0152242
100.6					0.112902									220	0.0154796
100.75					0.112068									220.328	0.0150481
100.9					0.111891									220.657	0.0145722
101.051					0.111846									220.985	0.0140964
101.201					0.111231									221.314	0.0141295
101.351					0.11161									221.642	0.014223
101.501					0.111503									221.97	0.0143165
101.651					0.110752									222.299	0.0142608
101.801					0.110172									222.627	0.0141786
101.951					0.109588									222.955	0.0140963
102.102					0.109102									223.284	0.0140256
102.252					0.109648									223.612	0.0139577
102.402					0.109477									223.94	0.0138898
102.552					0.109533									224.269	0.0138193
102.702					0.109069									224.597	0.0137481
102.852					0.108661									224.925	0.0136768
103.003					0.107952									225.254	0.0136091
103.153					0.10703									225.582	0.0135428
103.303					0.107436									225.911	0.0134766
103.453					0.106823									226.239	0.0132024
103.603					0.10697									226.567	0.0128228
103.753					0.107047									226.896	0.0124433
103.903					0.106585									227.224	0.0124441
104.054					0.105778									227.552	0.0126798
104.204					0.105355									227.881	0.0129155
104.354					0.105286									228.209	0.0130094
104.504					0.105334									228.537	0.0129975
104.654					0.104557									228.866	0.0129857
104.804					0.103902									229.194	0.0128224
104.954					0.104557									229.522	0.0125234
105.105					0.103514									229.851	0.0122244
105.255					0.103775									230.179	0.0122031
105.405					0.103097									230.508	0.0124805
105.555					0.102128									230.836	0.0127579
105.705					0.102432									231.164	0.012818
105.855					0.102306									231.493	0.0125976
106.006					0.101868									231.821	0.0123771
106.156					0.102019									232.149	0.0122553
106.306					0.101726									232.478	0.012287
106.456					0.100895									232.806	0.0123188
106.606					0.100365									233.134	0.0122737
106.756					0.100187									233.463	0.0120828
106.906					0.100529									233.791	0.0118919
107.057					0.100116									234.12	0.0117429
107.207					0.100194									234.448	0.0116917
107.357					0.1									234.776	0.0116406
107.507					0.0993248									235.105	0.0115715
107.657					0.0991923									235.433	0.0114491
107.807					0.0983732									235.761	0.0113267
107.957					0.0988102									236.09	0.0111835
108.108					0.098475									236.418	0.0109601
108.258					0.0976873									236.746	0.0107367
108.408					0.0977793									237.075	0.0105629
108.558					0.0979739									237.403	0.0106482
108.708					0.0977397									237.731	0.0107335
108.858					0.0965514									238.06	0.0108
109.009					0.0959234									238.388	0.0107225
109.159					0.0963077									238.717	0.0106449
109.309					0.0964034									239.045	0.0105692
109.459					0.0964803									239.373	0.010517
109.609					0.096234									239.702	0.0104648
109.759					0.096032									240.03	0.0104093
109.909					0.0955118									240.358	0.010219
110.06					0.0945888									240.687	0.0100286
110.21					0.093916									241.015	0.00983829
110.36					0.0944324									241.343	0.0099597
110.51					0.0940832									241.672	0.0100879
110.66					0.0944309									242	0.010216
110.81					0.094099									242.328	0.0101827
110.96					0.0940554									242.657	0.0101379
111.111					0.0931798									242.985	0.0100931
111.261					0.092585									243.314	0.0101009
111.411					0.0924202									243.642	0.0101155
111.561					0.0926369									243.97	0.01013
111.711					0.0923676									244.299	0.0101472
111.861					0.0926646									244.627	0.010165
112.011					0.092343									244.955	0.0101828
112.162					0.0914667									245.284	0.0100217
112.312					0.0912731									245.612	0.00981509
112.462					0.0907377									245.94	0.00960845
112.612					0.0904615									246.269	0.00958701
112.762					0.0906622									246.597	0.0096278
112.912					0.0906047									246.925	0.0096686
113.063					0.0906547									247.254	0.00958508
113.213					0.0904392									247.582	0.00944904
113.363					0.0901411									247.911	0.00931301
113.513					0.0892603									248.239	0.00931046
113.663					0.0887434									248.567	0.00937743
113.813					0.0886135									248.896	0.0094444
113.963					0.0888085									249.224	0.00934083
114.114					0.0882347									249.552	0.0091292
114.264					0.0884519									249.881	0.00891756
114.414					0.0883831									250.209	0.00874793
114.564					0.087861									250.537	0.00861042
114.714					0.0869336									250.866	0.00847292
114.864					0.0864389									251.194	0.0084907
115.014					0.0866334									251.523	0.00865113
115.165					0.0866656									251.851	0.00881156
115.315					0.0868979									252.179	0.00884195
115.465					0.086526									252.508	0.00872905
115.615					0.0864819									252.836	0.00861614
115.765					0.0854391									253.164	0.0085622
115.915					0.0849894									253.493	0.00858631
116.066					0.0846694									253.821	0.00861042
116.216					0.0856535									254.149	0.00863252
116.366					0.0848728									254.478	0.00865141
116.516					0.0848185									254.806	0.0086703
116.666					0.0852474									255.134	0.00860175
116.816					0.0848661									255.463	0.00836301
116.966					0.0841623									255.791	0.00812427
117.117					0.0833597									256.12	0.00796687
117.267					0.0832199									256.448	0.00800486
117.417					0.0835917									256.776	0.00804285
117.567					0.083343									257.105	0.00803458
117.717					0.0832764									257.433	0.00788407
117.867					0.0833022									257.761	0.00773357
118.017					0.0827913									258.09	0.00761384
118.168					0.0823567									258.418	0.0076172
118.318					0.0819562									258.746	0.00762057
118.468					0.0816898									259.075	0.00763598
118.618					0.0813891									259.403	0.00771733
118.768					0.0805486									259.731	0.00779868
118.918					0.0811745									260.06	0.00785735
119.069					0.081242									260.388	0.00773083
119.219					0.0804692									260.717	0.00760431
119.369					0.0800603									261.045	0.00748768
119.519					0.0797532									261.373	0.00751672
119.669					0.079468									261.702	0.00754575
119.819					0.0792005									262.03	0.00757447
119.969					0.0789299									262.358	0.00758675
120.12					0.0792243									262.687	0.00759902
120.27					0.0789443									263.015	0.00761129
120.42					0.0787717									263.343	0.00742255
120.57					0.0782199									263.672	0.00722818
120.72					0.0782217									264	0.0070338
120.87					0.078158									264.328	0.00702465
121.02					0.077787									264.657	0.00703003
121.171					0.077938									264.985	0.00703541
121.321					0.0781489									265.314	0.00702966
121.471					0.0773981									265.642	0.00702241
121.621					0.0764342									265.97	0.00701517
121.771					0.0760659									266.299	0.00699063
121.921					0.0764839									266.627	0.0069627
122.072					0.0764419									266.955	0.00693478
122.222					0.0758531									267.284	0.00691673
122.372					0.0761664									267.612	0.0069013
122.522					0.0757571									267.94	0.00688586
122.672					0.0753246									268.269	0.00686546
122.822					0.0750197									268.597	0.00684333
122.972					0.0745164									268.925	0.00682121
123.123					0.0748586									269.254	0.00671394
123.273					0.0748127									269.582	0.00656965
123.423					0.0747243									269.911	0.00642537
123.573					0.0743414									270.239	0.00644186
123.723					0.0743806									270.567	0.00654435
123.873					0.0738711									270.896	0.00664685
124.023					0.073314									271.224	0.00652407
124.174					0.0731644									271.552	0.00625486
124.324					0.0734703									271.881	0.00598566
124.474					0.0731567									272.209	0.00588902
124.624					0.0731334									272.537	0.00592763
124.774					0.0731909									272.866	0.00596625
124.924					0.0723339									273.194	0.00603463
125.075					0.0720576									273.523	0.00613103
125.225					0.0713074									273.851	0.00622743
125.375					0.0711842									274.179	0.00629727
125.525					0.0713376									274.508	0.00633712
125.675					0.0708233									274.836	0.00637698
125.825					0.0711335									275.164	0.00625059
125.975					0.0708904									275.493	0.00589858
126.126					0.0709936									275.821	0.00554656
126.276					0.0702001									276.149	0.00541574
126.426					0.0697857									276.478	0.00564768
126.576					0.0698233									276.806	0.00587962
126.726					0.0699415									277.134	0.00603987
126.876					0.0695588									277.463	0.00605673
127.026					0.0693088									277.791	0.0060736
127.177					0.0695977									278.12	0.00602837
127.327					0.0691704									278.448	0.00582952
127.477					0.0681803									278.776	0.00563067
127.627					0.0678505									279.105	0.00546533
127.777					0.0682893									279.433	0.00540649
127.927					0.0681151									279.761	0.00534764
128.077					0.0680415									280.09	0.00530263
128.228					0.0682741									280.418	0.00531512
128.378					0.0679395									280.746	0.00532761
128.528					0.0676947									281.075	0.0053367
128.678					0.0664914									281.403	0.00532636
128.828					0.0665005									281.731	0.00531602
128.978					0.0668055									282.06	0.0052894
129.129					0.0667819									282.388	0.00512105
129.279					0.0667371									282.717	0.00495269
129.429					0.0664165									283.045	0.00479963
129.579					0.0660906									283.373	0.00489682
129.729					0.0658995									283.702	0.004994
129.879					0.0650105									284.03	0.005088
130.029					0.0652484									284.358	0.00492238
130.18					0.0655119									284.687	0.00475676
130.33					0.0649782									285.015	0.00459114
130.48					0.0652094									285.343	0.0045584
130.63					0.0653607									285.672	0.00453025
130.78					0.0640607									286	0.00450209
130.93					0.0642894									286.328	0.0046838
131.08					0.0637018									286.657	0.00488347
131.231					0.0637751									286.985	0.00508313
131.381					0.0635818									287.314	0.00490437
131.531					0.0631341									287.642	0.00467194
131.681					0.0633775									287.97	0.0044395
131.831					0.0631299									288.299	0.0043742
131.981					0.0629103									288.627	0.00434307
132.132					0.0625263									288.955	0.00431193
132.282					0.0619758									289.284	0.00424447
132.432					0.0619481									289.612	0.00416705
132.582					0.0621822									289.94	0.00408964
132.732					0.0617968									290.269	0.00418898
132.882					0.0618237									290.597	0.0043516
133.032					0.0615528									290.926	0.00451423
133.183					0.0615769									291.254	0.00442109
133.333					0.0605912									291.582	0.00421352
133.483					0.0606601									291.911	0.00400595
133.633					0.0604169									292.239	0.00390427
133.783					0.0604561									292.567	0.00386075
133.933					0.060281									292.896	0.00381723
134.083					0.0603									293.224	0.00376474
134.234					0.0600803									293.552	0.00370627
134.384					0.0591608									293.881	0.00364779
134.534					0.0589779									294.209	0.00362659
134.684					0.0591789									294.537	0.00363533
134.834					0.0588506									294.866	0.00364407
134.984					0.0587469									295.194	0.00364634
135.135					0.0585793									295.523	0.00364238
135.285					0.0586915									295.851	0.00363842
135.435					0.0584689									296.179	0.00364016
135.585					0.0579668									296.508	0.00364851
135.735					0.0572112									296.836	0.00365686
135.885					0.0575721									297.164	0.003562
136.035					0.0580073									297.493	0.00332353
136.186					0.0576786									297.821	0.00308507
136.336					0.0577518									298.149	0.0029882
136.486					0.0574873									298.478	0.00312964
136.636					0.0570645									298.806	0.00327108
136.786					0.0561928									299.134	0.00332408
136.936					0.0560772									299.463	0.00319527
137.086					0.0560649									299.791	0.00306647
137.237					0.0560611									300.12	0.00292216
137.387					0.0557491									300.448	0.00273834
137.537					0.0558819									300.776	0.00255452
137.687					0.0554452									301.105	0.00246858
137.837					0.0552847									301.433	0.00270427
137.987					0.0545983									301.761	0.00293996
138.138					0.0543048									302.09	0.00312746
138.288					0.0548321									302.418	0.00310668
138.438					0.0543766									302.746	0.0030859
138.588					0.0540675									303.075	0.00306681
138.738					0.0543564									303.403	0.00305782
138.888					0.0543568									303.731	0.00304884
139.038					0.0532862									304.06	0.0030171
139.189					0.0531289									304.388	0.00277347
139.339					0.0530654									304.717	0.00252985
139.489					0.0528406									305.045	0.00230639
139.639					0.0529453									305.373	0.00245434
139.789					0.0529517									305.702	0.00260229
139.939					0.0526584									306.03	0.00274898
140.089					0.0525266									306.358	0.00269035
140.24					0.0519406									306.687	0.00263171
140.39					0.0516459									307.015	0.00257307
140.54					0.0512958									307.343	0.00243685
140.69					0.0516593									307.672	0.00229744
140.84					0.0511617									308	0.00215803
140.99					0.0516991									308.328	0.0021906
141.141					0.0517172									308.657	0.00223911
141.291					0.0507693									308.985	0.00228762
141.441					0.0508121									309.314	0.00240746
141.591					0.0505296									309.642	0.00253798
141.741					0.0507383									309.97	0.00266851
141.891					0.0507729									310.299	0.00259095
142.041					0.0505418									310.627	0.00246902
142.192					0.050547									310.955	0.0023471
142.342					0.0503137									311.284	0.00217072
142.492					0.0497961									311.612	0.0019786
142.642					0.0490232									311.94	0.00178649
142.792					0.049164									312.269	0.00184406
142.942					0.0493139									312.597	0.00199384
143.092					0.0490349									312.926	0.00214362
143.243					0.0489765									313.254	0.00213314
143.393					0.0492093									313.582	0.00204891
143.543					0.0489545									313.911	0.00196468
143.693					0.0481822									314.239	0.00194364
143.843					0.0480545									314.567	0.00195823
143.993					0.0481041									314.896	0.00197282
144.143					0.0481262									315.224	0.00190933
144.294					0.0476547									315.552	0.00179247
144.444					0.0477799									315.881	0.00167561
144.594					0.0477467									316.209	0.00164986
144.744					0.0472444									316.537	0.0016991
144.894					0.0471094									316.866	0.00174834
145.044					0.0467202									317.194	0.00168908
145.195					0.0466683									317.523	0.00152264
145.345					0.0466442									317.851	0.0013562
145.495					0.0464912									318.179	0.00128304
145.645					0.0466131									318.508	0.00132044
145.795					0.0468048									318.836	0.00135784
145.945					0.0462713									319.164	0.00136702
146.095					0.0460931									319.493	0.00133593
146.246					0.0458718									319.821	0.00130484
146.396					0.0454736									320.149	0.00129406
146.546					0.0455486									320.478	0.00131837
146.696					0.0454645									320.806	0.00134268
146.846					0.045282									321.134	0.00138796
146.996					0.0450709									321.463	0.00147756
147.146					0.0446302									321.791	0.00156715
147.297					0.0445226									322.12	0.00164623
147.447					0.0437927									322.448	0.00169727
147.597					0.044015									322.776	0.0017483
147.747					0.0440462									323.105	0.00174041
147.897					0.0438518									323.433	0.00153215
148.047					0.0440475									323.761	0.00132388
148.198					0.0436633									324.09	0.00120837
148.348					0.0430411									324.418	0.00151028
148.498					0.0428888									324.746	0.00181218
148.648					0.0426469									325.075	0.00203483
148.798					0.0429571									325.403	0.00175553
148.948					0.0424873									325.731	0.00147622
149.098					0.0424631									326.06	0.00123886
149.249					0.0427445									326.388	0.00142092
149.399					0.0419914									326.717	0.00160299
149.549					0.0418807									327.045	0.00176624
149.699					0.0413959									327.373	0.00153441
149.849					0.041294									327.702	0.00130258
149.999					0.0416403									328.03	0.00107074
150.149					0.0416041
150.3					0.0413344
150.45					0.0414235
150.6					0.040892
150.75					0.0402524
150.9					0.0403137
151.05					0.0404329
151.201					0.0401815
151.351					0.0403352
151.501					0.0399053
151.651					0.0404625
151.801					0.0397975
151.951					0.0393443
152.101					0.0387661
152.252					0.0390312
152.402					0.0387157
152.552					0.0391543
152.702					0.0387794
152.852					0.038866
153.002					0.0381424
153.152					0.0379966
153.303					0.0377154
153.453					0.0376387
153.603					0.0377656
153.753					0.0374623
153.903					0.0376709
154.053					0.0375279
154.204					0.0371944
154.354					0.0366549
154.504					0.0365139
154.654					0.0365221
154.804					0.036187
154.954					0.0367355
155.104					0.0366327
155.255					0.0361803
155.405					0.0359556
155.555					0.0354596
155.705					0.0355474
155.855					0.0354658
156.005					0.0355474
156.155					0.0355298
156.306					0.0353981
156.456					0.0345826
156.606					0.0346005
156.756					0.034208
156.906					0.0343404
157.056					0.0341958
157.206					0.034139
157.357					0.0341028
157.507					0.0338784
157.657					0.0333534
157.807					0.0328029
157.957					0.0331618
158.107					0.0331146
158.258					0.0327959
158.408					0.0331383
158.558					0.033081
158.708					0.0325727
158.858					0.0320037
159.008					0.0321619
159.158					0.0320336
159.309					0.0319859
159.459					0.0322256
159.609					0.0318324
159.759					0.0316598
159.909					0.0315061
160.059					0.0309217
160.209					0.0306177
160.36					0.0308309
160.51					0.0303064
160.66					0.0304263
160.81					0.0306777
160.96					0.0305758
161.11					0.0302328
161.261					0.0300963
161.411					0.0295312
161.561					0.0301209
161.711					0.0300254
161.861					0.029851
162.011					0.0299195
162.161					0.0298059
162.312					0.0292677
162.462					0.0289317
162.612					0.029365
162.762					0.0292484
162.912					0.0290806
163.062					0.0290455
163.212					0.0293026
163.363					0.0288063
163.513					0.0282729
163.663					0.0279906
163.813					0.0280691
163.963					0.0283959
164.113					0.0279976
164.264					0.0285064
164.414					0.0279889
164.564					0.0279039
164.714					0.0274418
164.864					0.0271243
165.014					0.0270842
165.164					0.027155
165.315					0.0271292
165.465					0.0274511
165.615					0.0270779
165.765					0.0266243
165.915					0.0265749
166.065					0.0265074
166.215					0.026631
166.366					0.0266429
166.516					0.0262388
166.666					0.0262666
166.816					0.0259835
166.966					0.0261399
167.116					0.0256666
167.267					0.0255068
167.417					0.0252789
167.567					0.0258081
167.717					0.0254768
167.867					0.0255177
168.017					0.0251555
168.167					0.0253385
168.318					0.0249335
168.468					0.0252978
168.618					0.024404
168.768					0.0249025
168.918					0.0250525
169.068					0.0252108
169.218					0.024636
169.369					0.0240663
169.519					0.0242663
169.669					0.0245572
169.819					0.0239311
169.969					0.024165
170.119					0.0242702
170.269					0.0240593
170.42					0.0237359
170.57					0.0232355
170.72					0.0231234
170.87					0.0234646
171.02					0.0231303
171.17					0.0230395
171.321					0.0231958
171.471					0.0232438
171.621					0.0225998
171.771					0.0226252
171.921					0.0225878
172.071					0.0223288
172.221					0.0225427
172.372					0.0223765
172.522					0.0225785
172.672					0.0223318
172.822					0.0214553
172.972					0.0213737
173.122					0.0214663
173.272					0.0216959
173.423					0.0214959
173.573					0.0215037
173.723					0.0217516
173.873					0.0214838
174.023					0.0210621
174.173					0.0208359
174.324					0.0208656
174.474					0.0207719
174.624					0.0210441
174.774					0.0209512
174.924					0.0207987
175.074					0.0201498
175.224					0.0199888
175.375					0.0200276
175.525					0.0198302
175.675					0.0195323
175.825					0.0197817
175.975					0.0197359
176.125					0.0192717
176.275					0.0191245
176.426					0.0189521
176.576					0.0189425
176.726					0.0188792
176.876					0.018985
177.026					0.0186241
177.176					0.0188323
177.327					0.0186619
177.477					0.0183058
177.627					0.0180847
177.777					0.0183517
177.927					0.0178613
178.077					0.01804
178.227					0.0182994
178.378					0.0179019
178.528					0.0175692
178.678					0.0175414
178.828					0.0173273
178.978					0.0175261
179.128					0.0168595
179.278					0.017201
179.429					0.0171789
179.579					0.0172897
179.729					0.0166041
179.879					0.0158742
180.029					0.0159993
180.179					0.0163555
180.33					0.0159857
180.48					0.0161201
180.63					0.0160175
180.78					0.0157323
180.93					0.0158386
181.08					0.0158955
181.23					0.0156311
181.381					0.0156791
181.531					0.0154945
181.681					0.0155382
181.831					0.0154213
181.981					0.0153805
182.131					0.0147221
182.281					0.0145719
182.432					0.0148037
182.582					0.0146264
182.732					0.0149801
182.882					0.0147749
183.032					0.0145281
183.182					0.0145522
183.332					0.0141608
183.483					0.0141373
183.633					0.0137828
183.783					0.0139416
183.933					0.0138888
184.083					0.0141542
184.233					0.0141002
184.384					0.0139097
184.534					0.0134269
184.684					0.013387
184.834					0.0135971
184.984					0.0134233
185.134					0.0132061
185.284					0.0138158
185.435					0.0133921
185.585					0.013073
185.735					0.01321
185.885					0.0129206
186.035					0.0126803
186.185					0.0128607
186.335					0.0129001
186.486					0.0127206
186.636					0.0123938
186.786					0.0123651
186.936					0.0121762
187.086					0.012364
187.236					0.0122378
187.387					0.0118625
187.537					0.012047
187.687					0.0122122
187.837					0.0116342
187.987					0.0115405
188.137					0.0116362
188.287					0.0119622
188.438					0.011672
188.588					0.0114514
188.738					0.0115207
188.888					0.0116583
189.038					0.0115617
189.188					0.0110484
189.338					0.0110875
189.489					0.0111939
189.639					0.0109915
189.789					0.0108718
189.939					0.0111181
190.089					0.0108741
190.239					0.0107526
190.39					0.0100554
190.54					0.0101593
190.69					0.0106477
190.84					0.0103552
190.99					0.0104915
191.14					0.0106844
191.29					0.0100911
191.441					0.010602
191.591					0.00994223
191.741					0.00994568
191.891					0.0100728
192.041					0.0100081
192.191					0.0099488
192.341					0.0102772
192.492					0.00998222
192.642					0.00956157
192.792					0.00964756
192.942					0.00961288
193.092					0.00963538
193.242					0.00953682
193.393					0.0100024
193.543					0.00985638
193.693					0.00967568
193.843					0.00945419
193.993					0.00911831
194.143					0.00938433
194.293					0.00910214
194.444					0.00940533
194.594					0.00927812
194.744					0.00908358
194.894					0.00901361
195.044					0.00902594
195.194					0.00904153
195.344					0.00901001
195.495					0.00885605
195.645					0.00946335
195.795					0.00917834
195.945					0.00885454
196.095					0.00885323
196.245					0.00833284
196.395					0.00835511
196.546					0.00874823
196.696					0.00843584
196.846					0.00845114
196.996					0.0087364
197.146					0.00835262
197.296					0.00803589
197.447					0.00818327
197.597					0.00773548
197.747					0.00819243
197.897					0.00794294
198.047					0.00816052
198.197					0.00813962
198.347					0.00782342
198.498					0.00742518
198.648					0.0073561
198.798					0.00780623
198.948					0.00753778
199.098					0.00751254
199.248					0.00746757
199.398					0.00743741
199.549					0.00728711
199.699					0.00732682
199.849					0.0071505
199.999					0.00728959
200.149					0.00747541
200.299					0.00725471
200.45					0.00712857
200.6					0.00717262
200.75					0.00722187
200.9					0.00717496
201.05					0.00689822
201.2					0.00673511
201.35					0.00724589
201.501					0.00713267
201.651					0.00716394
201.801					0.0068003
201.951					0.00671674
202.101					0.00648493
202.251					0.00652766
202.401					0.00663723
202.552					0.00679002
202.702					0.0068038
202.852					0.00677784
203.002					0.00620518
203.152					0.00612844
203.302					0.00585838
203.453					0.00623178
203.603					0.00588128
203.753					0.00609107
203.903					0.00632936
204.053					0.0064881
204.203					0.00605634
204.353					0.00592654
204.504					0.00601853
204.654					0.00580581
204.804					0.00574482
204.954					0.00573074
205.104					0.00601229
205.254					0.00605965
205.404					0.00558419
205.555					0.00547661
205.705					0.00523398
205.855					0.00519033
206.005					0.00555096
206.155					0.00540421
206.305					0.00549493
206.456					0.00521337
206.606					0.00492661
206.756					0.00530736
206.906					0.00516426
207.056					0.00513761
207.206					0.00482668
207.356					0.00532831
207.507					0.0050679
207.657					0.00461606
207.807					0.00478434
207.957					0.00485362
208.107					0.00483043
208.257					0.00484997
208.407					0.00449699
208.558					0.00457972
208.708					0.00461996
208.858					0.00420657
209.008					0.00412452
209.158					0.0041197
209.308					0.00416998
209.458					0.00450805
209.609					0.00446951
209.759					0.00438961
209.909					0.00407507
210.059					0.00412871
210.209					0.00335752
210.359					0.00370899
210.51					0.00393096
210.66					0.00391848
210.81					0.00373086
210.96					0.00412467
211.11					0.00340487
211.26					0.00348229
211.41					0.00334953
211.561					0.00369052
211.711					0.00352721
211.861					0.00342651
212.011					0.0036896
212.161					0.00332005
212.311					0.00322631
212.461					0.00300771
212.612					0.00306773
212.762					0.00351566
212.912					0.00335021
213.062					0.00317725
213.212					0.00316268
213.362					0.00322173
213.513					0.00315182
213.663					0.00277857
213.813					0.00260756
213.963					0.00296605
214.113					0.00270929
214.263					0.00296215
214.413					0.00258642
214.564					0.00281994
214.714					0.00241999
214.864					0.00234423
215.014					0.00257804
215.164					0.00222462
215.314					0.00277448
215.464					0.00252074
215.615					0.00253448
215.765					0.00243743
215.915					0.00171447
216.065					0.00252947
216.215					0.00236664
216.365					0.00233302
216.516					0.00214155
216.666					0.00204674
216.816					0.00215666
216.966					0.00190185
217.116					0.00202594
217.266					0.00180207
217.416					0.00164115
217.567					0.00194726
217.717					0.00183764
217.867					0.00195286
218.017					0.00174989
218.167					0.00146853
218.317					0.001403
218.467					0.00141504
218.618					0.00150268
218.768					0.00123116
218.918					0.0015022
219.068					0.00164714
219.218					0.00179335
219.368					0.00118663
219.519					0.00136222
219.669					0.00131155
219.819					0.00132583
219.969					0.00117216
220.119					0.00167364
220.269					0.00153737
220.419					0.00122274
220.57					0.000984444
220.72					0.000804861
220.87					0.000907125
221.02					0.00119487
221.17					0.00119428
221.32					0.00123438
221.47					0.00108724
221.621					0.000633073
221.771					0.000587958
221.921					0.000905469
222.071					0.000409641
222.221					0.000660405
222.371					0.000736409
222.521					0.000804179
222.672					0.000863423
222.822					0.000728273
222.972					0.000454756
223.122					0.000524037
223.272					0.000310836
223.422					0.000695143
223.573					0.000722523
223.723					0.000860646
223.873					0.000138658
224.023					0.000508982
224.173					0
224.323					0.000185235

## Sheet: Figure7C
Cdc42:nucleotide	Cdc42WTGDP	Cdc42WTGDP	Cdc42WTGDP	Cdc42WTGDP	Cdc42WTGDP	Cdc42WTGDP	Cdc42WTGDP	Cdc42WTGDP	Cdc42G12VGTPgS	Cdc42G12VGTPgS	Cdc42G12VGTPgS	Cdc42G12VGTPgS	Cdc42G12VGTPgS	Cdc42G12VGTPgS	Cdc42G12VGTPgS	Cdc42G12VGTPgS
[XlGDIWT] uM	0	0.3125	0.625	1.25	2.5	5	10	20	0	0.3125	0.625	1.25	2.5	5	10	20
	0.0195123	0.0967522	0.145271	0.198701	0.22731	0.347921	0.393333	0.478597	0.022075	0.0672029	0.0670691	0.113987	0.171664	0.205645	0.299988	0.299081
	0.0190246	0.106094	0.134165	0.199504	0.239419	0.3524	0.429936	0.509076	0.0205173	0.0703197	0.0743263	0.100081	0.159024	0.234989	0.312109	0.302756
									0.0248727	0.0722732	0.0858875	0.114241	0.169417	0.241521	0.290447	0.330198
											0.108972	0.113651				0.301661
											0.0989334
											0.101195
											0.102716

## Sheet: Figure7E
RhoA:nucleotide	RhoAWTGDP	RhoAWTGDP	RhoAWTGDP	RhoAWTGDP	RhoAWTGDP	RhoAWTGDP	RhoAWTGDP	RhoAWTGDP	RhoAG14VGTPgS	RhoAG14VGTPgS	RhoAG14VGTPgS	RhoAG14VGTPgS	RhoAG14VGTPgS	RhoAG14VGTPgS	RhoAG14VGTPgS	RhoAG14VGTPgS
[XlGDIWT] uM	0	0.3125	0.625	1.25	2.5	5	10	20	0	0.3125	0.625	1.25	2.5	5	10	20
	0.0162858	0.0540913	0.120744	0.166634	0.204136	0.349985	0.412013	0.536452	0.0269136	0.0647844	0.0919447	0.123124	0.149376	0.203697	0.235016	0.35592
	0.0195039	0.073048	0.113686	0.178915	0.213433	0.342502	0.444396	0.563943	0.0272675	0.0653839	0.0723751	0.113143	0.134858	0.209786	0.2541	0.345612
									0.0299079	0.0636813	0.0857992	0.108357	0.14301	0.183098	0.261405	0.351504
									0.02814	0.0649365				0.183475
