# Supplementary material for: Extraction of active RhoGTPases by RhoGDI regulates spatiotemporal patterning of RhoGTPases
Source: eLife. 2019 Oct 24;8:e50471. doi: 10.7554/eLife.50471 (PMC6910828; doi:10.7554/eLife.50471)
Supplement: Figure 8—figure supplement 1—source data 1. [file elife-50471-fig8-figsupp1-data1.xlsx]

## Sheet: Published GDI mutants
All tagged non-extracting RhoGDIa2
07.18.17			ring	bg	ring-bg
N'3xGFPRhoGDIa2WT001			13.896	12.232	1.664
N'3xGFPRhoGDIa2WT002			14.578	12.245	2.333
N'3xGFPRhoGDIa2WT003			18.699	16.625	2.074
N'3xGFPRhoGDIa2WT004			15.781	11.828	3.953
N'3xGFPRhoGDIa2WT005			21.677	16.702	4.975
N'3xGFPRhoGDIa2WT006			21.077	14.364	6.713
N'3xGFPRhoGDIa2WT007			20.49	14.561	5.929
N'3xGFPRhoGDIa2WT008			15.538	11.006	4.532
07.16.17
3xGFPRhoGDIa2HR013			16.245	12.801	3.444
3xGFPRhoGDIa2HR014			14.384	10.275	4.109
3xGFPRhoGDIa2HR015			14.172	11.459	2.713
3xGFPRhoGDIa2HR016			16.334	13.75	2.584
3xGFPRhoGDIa2HR017			25.809	17.661	8.148
3xGFPRhoGDIa2HR018			24.166	16.032	8.134
07.09.17
3xGFP 8A RhoGDIa2 001			13.759	9.036	4.723
3xGFP 8A RhoGDIa2 002			16.35	12.022	4.328
3xGFP 8A RhoGDIa2 003			18.703	12.327	6.376
3xGFP 8A RhoGDIa2 004			17.914	13.069	4.845
3xGFP 8A RhoGDIa2 005			12.462	9.316	3.146
3xGFP 8A RhoGDIa2 006			16.441	8.732	7.709
3xGFP -55AA RhoGDIa2 007			24.24	11.951	12.289
3xGFP -55AA RhoGDIa2 008			23.49	11.532	11.958
3xGFP -55AA RhoGDIa2 009			18.461	11.601	6.86
3xGFP -55AA RhoGDIa2 010			26.009	14.359	11.65
3xGFP -55AA RhoGDIa2 011			19.074	11.042	8.032
3xGFP -55AA RhoGDIa2 012			16.674	10.505	6.169
05.04.17
3xGFPRhoGDIa2-20aamutant001			18.507	13.162	5.345
3xGFPRhoGDIa2-20aamutant002			22.581	14.508	8.073
3xGFPRhoGDIa2-20aamutant003			26.18	17.51	8.67
3xGFPRhoGDIa2-20aamutant004			24.817	17.656	7.161
3xGFPRhoGDIa2-20aamutant017			15.116	13.036	2.08
3xGFPRhoGDIa2-20aamutant018			18.258	11.45	6.808
3xGFPRhoGDIa2D180Amutant009			18.574	11.007	7.567
3xGFPRhoGDIa2D180Amutant010			14.904	9.678	5.226
3xGFPRhoGDIa2D180Amutant011			23.187	14.813	8.374
3xGFPRhoGDIa2D180Amutant012			19.964	11.392	8.572
3xGFPRhoGDIa2D180Amutant013			18.199	12.518	5.681
3xGFPRhoGDIa2D180Amutant014			19.73	12.801	6.929
3xGFPRhoGDIa2D180Nmutant005			13.311	10.827	2.484
3xGFPRhoGDIa2D180Nmutant006			20.459	14.133	6.326
3xGFPRhoGDIa2D180Nmutant007			21.321	15.249	6.072
3xGFPRhoGDIa2D180Nmutant008			16.678	11.679	4.999
3xGFPRhoGDIa2D180Nmutant015			26.375	17.12	9.255
3xGFPRhoGDIa2D180Nmutant016			27.972	16.985	10.987
05.09.17
3xGFPRhoGDID40A001			15.925	12.346	3.579
3xGFPRhoGDID40A002			17.666	17.333	0.333
3xGFPRhoGDID40A003			11.294	10.221	1.073
3xGFPRhoGDID40A004			12.756	11.072	1.684
3xGFPRhoGDID40A005			27.067	20.623	6.444
3xGFPRhoGDID40A006			27.182	20.418	6.764
3xGFPRhoGDID40A015			12.304	10.251	2.053
3xGFPRhoGDID40A016			11.998	9.791	2.207
3xGFPRhoGDIa2D40N007			28.468	20.268	8.2
3xGFPRhoGDIa2D40N008			29.816	20.987	8.829
3xGFPRhoGDIa2D40N009			22.146	15.993	6.153
3xGFPRhoGDIa2D40N010			25.37	17.601	7.769
3xGFPRhoGDIa2D40N011			23.51	19.374	4.136
3xGFPRhoGDIa2D40N012			26.732	18.802	7.93
3xGFPRhoGDIa2D40N013			15.385	14.713	0.672
3xGFPRhoGDIa2D40N014			16.929	14.482	2.447
