# Supplementary material for: Extraction of active RhoGTPases by RhoGDI regulates spatiotemporal patterning of RhoGTPases
Source: eLife. 2019 Oct 24;8:e50471. doi: 10.7554/eLife.50471 (PMC6910828; doi:10.7554/eLife.50471)
Supplement: Figure 8—figure supplement 2—source data 1. [file elife-50471-fig8-figsupp2-data1.xlsx]

## Sheet: SuppFigXX_Q61L_GDIQQ_A
	Cdc42WTGDP/XlGDIQQ	Cdc42Q61LGTP/XlfGDIQQ
0	0.0202118	0.0168175
0	0.0205895	0.0172091
0.3125	0.0550461	0.0185532
0.3125	0.0486411	0.0176041
0.625	0.0737866	0.0203887
0.625	0.0824255	0.021696
1.25	0.109637	0.0202849
1.25	0.113076	0.0199233
2.5	0.14915	0.0215394
2.5	0.168512	0.019795
5	0.213111	0.0214103
5	0.205831	0.0206129
10	0.261772	0.0220098
10	0.316469	0.0248174
20	0.315264	0.0246993
20	0.390527	0.0297885

## Sheet: SuppFigXX_Q61L_GDIQQ_B
	RhoAWTGDP/XlRhoGDIQQ	RhoAQ63LGTP/XlRhoGDIQQ
0	0.0134631	0.0257006
0	0.0179003	0.0261667
0.3125	0.0352855	0.0260407
0.3125	0.0305483	0.0232004
0.625	0.0413002	0.019892
0.625	0.0426874	0.0158196
1.25	0.0692968	0.0185925
1.25	0.0712932	0.0183009
2.5	0.107084	0.0173638
2.5	0.116614	0.0189243
5	0.143811	0.0198292
5	0.152219	0.0211563
10	0.237879	0.0237843
10	0.260294	0.0169592
20	0.329199	0.0231987
20	0.360181	0.021291
