# Supplementary material for: Extraction of active RhoGTPases by RhoGDI regulates spatiotemporal patterning of RhoGTPases
Source: eLife. 2019 Oct 24;8:e50471. doi: 10.7554/eLife.50471 (PMC6910828; doi:10.7554/eLife.50471)
Supplement: Figure 8—figure supplement 3—source data 1. [file elife-50471-fig8-figsupp3-data1.xlsx]

## Sheet: SuppFigure8_Cdc42
[BtRhoGDIQQ]	Cdc42WTGDP	SD	Cdc42Q61LGTP	SD
uM	sec^-1		sec^-1
0	0.0157883	0.000639103	0.0127038	0.00205475
0.3125	0.103832	0.00219477	0.0159808	0.00042463
0.625	0.149994	0.013265	0.0187551	0.00423912
1.25	0.185664	0.0296907	0.0244841	0.00276123
2.5	0.226108	0.0527154	0.0303943	0.00455186
5	0.565237	0.058033	0.0385691	0.0011647
10	0.810297	0.112648	0.0580275	0.00434847
20	1.00295	0.00242928	0.0903579	0.00480089

## Sheet: SuppFigure8_RhoA
[BtRhoGDIQQ]	RhoAQ63LGTP	SD	[BtRhoGDIQQ]	RhoAWTGDP	SD
uM	sec^-1		uM	sec^-1
0	0.0254933	0.00119449	0	0.0202217	0.00571384
0.3125	0.0318276	0.00139203	0.3125	0.115675	0.00248511
0.625	0.0377674	0.000849988	0.79	0.188526	0.0115575
1.25	0.0471196	0.00338949	1.25	0.227232	0.00389493
2.5	0.0677922	0.00466203	2.5	0.281255	0.0163179
5	0.0887096	0.00416131	5	0.360276	0.0221367
