# Supplementary material for: Extraction of active RhoGTPases by RhoGDI regulates spatiotemporal patterning of RhoGTPases
Source: eLife. 2019 Oct 24;8:e50471. doi: 10.7554/eLife.50471 (PMC6910828; doi:10.7554/eLife.50471)
Supplement: Figure 8—source data 1. [file elife-50471-fig8-data1.xlsx]

## Sheet: WT, AA, QQ
	Ring int	Bg int	Ring-Bg
WT001	58.279	28.217	30.062
WT002	62.771	32.968	29.803
WT003	63.051	34.607	28.444
WT004	48.439	30.477	17.962
WT005	49.93	31.791	18.139
WT006	43.737	25.708	18.029
WT007	36.221	21.964	14.257
WT016	31.29	28.274	3.016
WT017	80	42.887	37.113
			21.8694	10.3862
158/9A008	61.16	22.324	38.836
158/9A009	56.97	21.928	35.042
158/9A010	89.82	27.424	62.396
158/9A011	96.009	36.131	59.878
158/9A012	103.245	36	67.245
158/9A013	101.989	31.569	70.42
158/9A015	136.479	41.822	94.657
			61.2106	20.1184
158/9Q018	238.028	96.902	141.126
158/9Q019	177.38	72.081	105.299
158/9Q020	110.657	53.025	57.632
158/9Q021	126.371	68.706	57.665
158/9Q022	241.506	86.949	154.557
158/9Q023	209.385	82.722	126.663
158/9Q024	132.241	47.295	84.946
158/9Q025	227.003	78.829	148.174
			109.508	39.3125

## Sheet: WT, isolated N-term
GDIN010	53.58	32.351	21.229
GDIN011	114.305	57.778	56.527
GDIN012	56.782	33.446	23.336
GDIN013	141.129	101.772	39.357
GDIN016	30.943	30.496	0.447
GDIN017	53.155	33.714	19.441
GDIN018	106.922	68.437	38.485
			28.4031	18.0351
GDIWT019	87.623	43.637	43.986
GDIWT020	84.94	44.101	40.839
GDIWT021	35.968	20.197	15.771
GDIWT022	47.051	23.746	23.305
			30.9753	13.6208

## Sheet: 8C Cdc42
Cdc42:nucleotide	Cdc42WTGDP	Cdc42WTGDP	Cdc42WTGDP	Cdc42WTGDP	Cdc42WTGDP	Cdc42WTGDP	Cdc42WTGDP	Cdc42WTGDP	Cdc42G12VGTPgS	Cdc42G12VGTPgS	Cdc42G12VGTPgS	Cdc42G12VGTPgS	Cdc42G12VGTPgS	Cdc42G12VGTPgS	Cdc42G12VGTPgS	Cdc42G12VGTPgS
[XlGDIQQ] uM	0	0.3125	0.625	1.25	2.5	5	10	20	0	0.3125	0.625	1.25	2.5	5	10	20
	0.0202118	0.0550461	0.0737866	0.109637	0.14915	0.213111	0.261772	0.315264	0.022075	0.026673	0.0313311	0.0361934	0.0282046	0.0375249	0.0568522	0.042186
	0.0205895	0.0486411	0.0824255	0.113076	0.168512	0.205831	0.316469	0.390527	0.0205173	0.027251	0.03006	0.0344531	0.0310976	0.0342111	0.054796	0.0603393
									0.0248727	0.0256913	0.0357404	0.0364233	0.0261921	0.0383512	0.0490189

## Sheet: 8C Rho
RhoA:nucleotide	RhoAWTGDP	RhoAWTGDP	RhoAWTGDP	RhoAWTGDP	RhoAWTGDP	RhoAWTGDP	RhoAWTGDP	RhoAWTGDP	RhoAG14VGTPgS	RhoAG14VGTPgS	RhoAG14VGTPgS	RhoAG14VGTPgS	RhoAG14VGTPgS	RhoAG14VGTPgS	RhoAG14VGTPgS	RhoAG14VGTPgS
[XlRhoGDIQQ] uM	0	0.3125	0.625	1.25	2.5	5	10	20	0	0.3125	0.625	1.25	2.5	5	10	20
	0.0134631	0.0352855	0.0413002	0.0692968	0.107084	0.143811	0.237879	0.329199	0.0269136	0.039894	0.0496602	0.0669578	0.0871425	0.126423	0.158354	0.209507
	0.0179003	0.0305483	0.0426874	0.0712932	0.116614	0.152219	0.260294	0.360181	0.0272675	0.0367186	0.0441844	0.0664558	0.104261	0.126507	0.167222	0.200912
									0.0299079	0.0523827	0.0492001	0.0738721	0.0949292	0.131588	0.159587	0.206096
									0.02814		0.0450364
