# Supplementary material for: Extraction of active RhoGTPases by RhoGDI regulates spatiotemporal patterning of RhoGTPases
Source: eLife. 2019 Oct 24;8:e50471. doi: 10.7554/eLife.50471 (PMC6910828; doi:10.7554/eLife.50471)
Supplement: Figure 9—source data 1. [file elife-50471-fig9-data1.xlsx]

## Sheet: Cy3-Cdc42 GTPgS (1)
	Ring int	Bg int	Ring-Bg
Control	Ring int	Bg int	Ring-bg
1	1136.55	858.564	277.986
2	1048.53	788.357	260.173
3	2053.27	1090.52	962.749
4	2174.02	1385.25	788.771
5	862.198	551.823	310.375
6	878.146	655.861	222.285
15	2208.96	1412.63	796.329
16	2090.6	1259.58	831.018
WT GDI
7	716.351	614.684	101.667
8	783.026	646.279	136.747
9	541.041	480.088	60.953
10	647.227	599.057	48.17
11	602.445	493.257	109.188
12	761.757	586.926	174.831
13	416.131	381.044	35.087
14	426.051	369.154	56.897
QQ GDI
17	736.659	542.783	193.876
18	1102.56	729.975	372.583
19	1357.65	840.821	516.833
20	1664.35	1010.77	653.58
21	670.775	478.148	192.627
22	712.557	510.642	201.915
23	1208.89	752.74	456.146
24	1203.09	757.79	445.304

## Sheet: Cy3-Cdc42 GTPgS (2)
		Ring int	Bg int	Ring-bg
Control
1		595.856	451.38	144.476
2		836.718	570.996	265.722
3		740.838	458.353	282.485
4		1054.84	523.042	531.802
5		637.824	361.508	276.316
6		595.962	353.61	242.352
27		1017.65	600.973	416.674
28		741.519	437.528	303.991
29		496.489	342.402	154.087
30		605.409	387.113	218.296
WT GDI
7		424.046	358.114	65.9319
8		383.926	333.522	50.404
9		1182.04	1020.88	161.155
10		1111.7	1053.68	58.022
11		808.471	701	107.471
12		860.598	686.774	173.824
23		1098.55	729.548	369.005
24		1040.47	786.484	253.988
25		518.12	381.463	136.657
26		698.932	473.255	225.677
QQ GDI
13		928.462	720.015	208.447
14		978.849	682.224	296.625
15		1051.54	702.854	348.683
16		1855.97	1205.62	650.35
17		1213.45	906.354	307.1
18		948.977	722.512	226.465
19		1163.34	802.847	360.494
20		1674.59	1137.55	537.042
21		809.269	545.758	263.511
22		787.932	583.471	204.461

## Sheet: Cy3-Cdc42 + QQ GDI
Control	bg	ring	area	ring width	wound width	ring-bg	norm	norm area	corr norm total activity
8	58.608	89.88	609.763	4.69	24.03	31.272	1.00583	613.316	19179.6
9	42.426	71.815	721.893	4.25	22.38	29.389	1.07998	779.632	22912.6
10	55.111	100.834	359.172	2.73	22.14	45.723	1.09169	392.104	17928.2
11	57.568	89.968	512.833	4.39	22.17	32.4	1.09021	559.097	18114.7
12	61.763	116.746	494.822	3.69	24.87	54.983	0.971854	480.895	26441
13	71.901	130.545	554.068	3.65	19.11	58.644	1.26478	700.776	41096.3
14	54.454	95.384	925.37	5.51	29.71	40.93	0.813531	752.817	30812.8
15	36.072	76.586	711.908	4.62	29.23	40.514	0.82689	588.67	23849.4
QQ
26	31.282	63.322	880.141	5.96	30.77	32.04	0.785505	691.355	22151
27	45.074	75.179	631.139	5.23	22.12	30.105	1.09268	689.631	20761.3
28	46.239	105.052	698.928	4.51	23.82	58.813	1.01469	709.198	41710
29	50.509	106.602	544.157	4.58	17.88	56.093	1.35179	735.586	41261.2
30	46.072	113.387	796.635	5.57	27.47	67.315	0.879869	700.934	47183.4
31	59.518	104.458	915.865	5.71	28.19	44.94	0.857396	785.259	35289.5
32	60.156	125.034	686.317	4.3	25.96	64.878	0.931048	638.994	41456.6
33	57.488	122.618	751.923	5.44	22.28	65.13	1.08483	815.708	53127.1
34	48.37	91.414	572.485	5.66	13.26	43.044	1.82278	1043.51	44916.9
35	54.352	100.486	731.472	5.13	25.59	46.134	0.94451	690.882	31873.2
36	55.886	101.705	672.411	4.06	28.33	45.819	0.853159	573.674	26285.2
			norm to:	24.1742

## Sheet: Cy3-Rho + QQ GDI
control	bg	ring	area	ring width	wound width	ring-bg	norm	norm area	corr norm total activity
1	35.51	67.154	334.8	2.04	18.24	31.644	0.935307	313.141	9909.03
2	45.096	84.633	226.738	2.19	11.09	39.537	1.53832	348.796	13790.4
4	32.872	72.715	186.575	2.73	8.77	39.843	1.94527	362.938	14460.6
5	36.303	72.717	253.624	2.34	22.18	36.414	0.769161	195.078	7103.56
6	42.849	82.333	211.834	2.51	21.64	39.484	0.788355	167	6593.84
7	45.593	116.752	323.114	1.92	24.31	71.159	0.701769	226.751	16135.4
8	38.43	98.564	168.861	1.59	13.8	60.134	1.23623	208.751	12553.1
QQ
17	29.425	55.898	194.638	1.65	15.58	26.473	1.09499	213.127	5642.12
20	33.553	60.387	337.611	2.32	20.95	26.834	0.81432	274.923	7377.29
21	36.823	66.379	373.188	2.72	21.98	29.556	0.77616	289.654	8561
22	33.146	53.022	166.531	2.19	13.08	19.876	1.30428	217.203	4317.13
23	37.415	72.912	229.586	2.32	16.46	35.497	1.03645	237.955	8446.68
24	27.193	55.382	277.108	2.62	13.73	28.189	1.24253	344.316	9705.93
				norm to:	17.0623

## Sheet: CA-Cdc42
05.01.18	bg	area	zone width	ring intensity	bg intensity	wound width	total activity (area*ring int)	area*ring int corr	normalization factor	norm zone width	norm zone area	norm total activity	corr norm total activity	05.01.18	bg	area	zone width	ring intensity	bg intensity	wound width	total activity (area*ring int)	area*ring int corr	normalization factor	norm zone width	norm zone area	norm total activity	corr norm total activity	05.01.18	bg	area	zone width	ring intensity	bg intensity	wound width	total activity (area*ring int)	area*ring int corr	normalization factor	norm zone width	norm zone area	norm total activity	corr norm total activity	05.01.18	bg	area	zone width	ring intensity	bg intensity	wound width	total activity (area*ring int)
ctrl001	40.889	691.093	4.39	92.5	46.121	27.52	63926.1	32052.2	0.851888	3.73979	588.734	54457.9	27304.9	CA007	35.311	1751.18	12.5	59.932	37.392	26.43	104952	39471.7	0.887021	11.0878	1553.34	93094.5	35012.2	WT016	30.252	566.271	4.24	79.872	34.18	22.02	45229.2	25874.1	1.06467	4.51419	602.89	48154	27547.2	QQ024	37.858	1548.85	11.78	58.248	37.542	24.57	90217.6
ctrl003	29.639	559.689	3.29	71.039	34.092	28.3	39759.7	20678.8	0.828408	2.72546	463.651	32937.3	17130.5	CA008	39.201	1694.53	12.31	61.468	38.877	26.03	104159	38281.1	0.900651	11.087	1526.18	93811.1	34477.9	WT017	34.369	389.608	4.2	97.795	33.791	20.49	38101.7	24936.5	1.14417	4.8055	445.776	43594.7	28531.5	QQ025	35.858	2039.31	13.86	47.041	34.143	20.81	95931.3
ctrl006	27.122	612.87	3.4	94.212	33.831	20.99	57739.7	37005.7	1.11691	3.7975	684.521	64490.1	41332.1	CA010	45.984	3677.29	20.31	62.55	47.449	34.63	230015	55530.8	0.676984	13.7495	2489.47	155716	37593.5	WT018	35.47	1796.04	9.21	63.222	41.979	27.96	113549	38153.3	0.838482	7.72242	1505.95	95209.2	31990.9	QQ026	26.285	1016.46	9.39	56.178	25.769	31.38	57102.5
05.11.18	bg													05.11.18														05.11.18														05.11.18
ctrl001	40.132	359.689	3.15	77.565	43.857	26.61	27899.3	12124.4	0.881021	2.77521	316.893	24579.8	10681.8	CA008	53.314	1298.22	8.96	69.401	50.342	22.72	90098.1	24742.9	1.03186	9.2455	1339.59	92969	25531.3	WT018	52.181	634.467	5.17	92.627	60.739	20.85	58768.8	20231.9	1.12441	5.8132	713.401	66080.2	22748.9	QQ021	48.213	1054.03	8.76	103.863	55.363	25.02	109475
ctrl004	41.709	371.857	2.51	80.77	47.556	28.48	30034.9	12350.9	0.823173	2.06616	306.103	24723.9	10166.9	CA011	51.937	1240.61	9.08	82.502	52.869	23.09	102353	36762.9	1.01533	9.21919	1259.62	103922	37326.5	WT019	42.419	507.581	5.97	88.828	51.904	19.64	45087.4	18741.9	1.19368	7.12629	605.891	53820.1	22371.9	QQ022	50.062	906.361	8.08	76.248	53.248	26.22	69108.2
ctrl014	37.428	447.448	3.47	95.991	41.665	25.2	42951	24308.1	0.930316	3.2282	416.268	39958	22614.2	CA012	64.531	1368.23	8.6	86.086	59.568	30.58	117786	36282.8	0.766644	6.59313	1048.95	90299.6	27816	WT020	65.277	592.16	5.92	113.027	69.688	17.17	66930.1	25663.6	1.3654	8.08318	808.537	91386.5	35041.2	QQ026	42.142	1215.61	9.24	72.584	45.498	30.61	88233.6
05.17.18	bg													05.17.18														05.17.18														05.17.18
ctrl003	53.895	282.507	2.94	144.657	65.282	18.35	40866.6	22424	1.2776	3.75614	360.931	52211.2	28648.9	CA007	76.721	1955.58	11.14	126.991	83.142	28.48	248342	85750.4	0.823173	9.17014	1609.78	204428	70587.4	WT017	63.542	519.416	3.89	148.185	63.885	20.59	76969.7	43786.8	1.13861	4.42919	591.412	87638.3	49856	QQ026	47.692	575.925	8.04	84.825	48.364	14.62	48852.8
ctrl004	45.64	211.058	2.72	135.01	58.25	18.75	28494.9	16200.8	1.25034	3.40094	263.895	35628.5	20256.6	CA008	78.203	1028.62	7.66	117.843	73.168	17.44	121216	45953.8	1.34426	10.2971	1382.74	162946	61774	WT018	64.415	541.79	5.97	142.176	65.642	17.78	77029.5	41465.4	1.31856	7.87179	714.381	101568	54674.5	QQ029	52.771	814.053	8.09	146.485	62.9	18.8	119247
ctrl005	47.361	406.398	4.2	131.886	54.287	22.9	53598.2	31536.1	1.02375	4.29977	416.051	54871.4	32285.2	CA011	34.535	721.672	4.27	80.12	41.579	23.47	57820.4	27814	0.99889	4.26526	720.871	57756.2	27783.1	WT024	60.415	659.874	7.23	111.259	58.452	14.7	73416.9	34846	1.59483	11.5306	1052.38	117087	55573.3	QQ030	53.253	835.355	7.5	119.67	55.152	18.89	99966.9
06.12.18														06.12.18														06.12.18														06.12.18
ctrl001	54.64	375.703	4.42	67.75	54.447	15.01	25453.9	4997.98	1.56189	6.90355	586.806	39756.1	7806.29	CA005	52.928	2186.5	13.39	79.23	63.382	31.18	173236	34651.7	0.751891	10.0678	1644.01	130255	26054.3	WT018	38.917	355.104	3.58	67.881	38.597	15.43	24104.8	10398.9	1.51938	5.43936	539.536	36624.3	15799.8	QQ012	57.534	1850.04	14.07	86.549	55.978	23.62	160119
ctrl002	43.889	742.973	5.5	58.34	40.343	26.95	43345	13371.3	0.869906	4.78448	646.316	37706.1	11631.8	CA006	53.271	2256.25	13.27	70.418	57.364	35.85	158881	29453.1	0.653946	8.67786	1475.47	103899	19260.7	WT019	46.671	632.101	5.59	86.268	46.041	20.16	54530.1	25427.5	1.16289	6.50058	735.067	63412.8	29569.5	QQ013	54.453	1312.13	10.67	90.525	54.032	22.93	118781
ctrl003	32.146	678.476	5	89.064	36.447	26.37	60427.8	35699.4	0.889039	4.44519	603.192	53722.7	31738.1	CA017	48.479	994.712	9.55	80.769	43.935	18.14	80341.9	36639.2	1.29239	12.3423	1285.56	103833	47352.2	WT021	42.912	696.524	4.82	68.738	39.547	29.93	47877.7	20332.2	0.783293	3.77547	545.582	37502.2	15926.1	QQ014	45.246	1119.49	9.57	70.312	42.505	17.65	78713.6
average	41.2075	478.313	3.74917	94.8987	46.3482	23.7858	42874.8	21895.8	1.02535	3.82687	471.114	42920.2	21799.8		52.8679	1681.12	10.92	81.4425	54.0889	26.5033	132433	40944.5	0.928587	9.65022	1444.63	116078	37547.4		48.07	657.578	5.4825	96.6565	50.3704	20.56	60132.9	27488.2	1.18736	6.46765	738.401	70173.1	32469.2		45.9472	1190.63	9.92083	84.3773	47.5412	22.9267	94645.6
std dev	8.71907	173.712	0.939685	28.0216	9.99726	4.50804	13486	10443.5	0.232158	1.24175	145.568	12829.3	10661.9		14.2888	792.425	3.97274	21.1372	14.0279	5.90289	58925.2	16290	0.221169	2.49808	419.19	40277	15349		12.7213	372.914	1.58134	27.6376	12.9549	4.52932	23472	10081.4	0.240087	2.16778	288.213	27439.9	13922.3		9.04761	434.799	2.2382	28.2847	10.8066	5.07713	30447.4
					average wound width:		23.444	<<normalize wound width to this value
[truncated: 6 more columns]

## Sheet: QQ OE Cdc42 Rho activity
07.13.17	bg	area	zone width	ring intensity	bg intensity	wound width	total activity (area*ring int)	area*ring int corr	normalization factor	norm zone width	norm zone area	norm total activity	corr norm total activity	07.13.17	bg	area	zone width	ring intensity	bg intensity	wound width	total activity (area*ring int)	area*ring int corr	normalization factor	norm zone width	norm zone area	norm total activity	corr norm total activity
ctrl001	24.814	424.988	4.23	72.545	26.924	22.032	30830.8	19388.4	0.837196	3.54134	355.798	25811.4	16231.9	GDI0.03 033	32.056	144.891	2.61	94.773	34.543	13.62	13731.8	8726.78	1.35427	3.53464	196.221	18596.5	11818.4
ctrl002	29.852	470.747	4.16	68.042	27.744	26.28	32030.6	18970.2	0.701869	2.91977	330.403	22481.3	13314.6	GDI0.03 035	27.504	238.959	3.61	90.023	31.899	16.52	21511.8	13889.3	1.11653	4.03068	266.805	24018.6	15507.8
ctrl003	27.692	265.091	2.89	88.002	34.038	20.22	23328.5	14305.4	0.912221	2.63632	241.822	21280.8	13049.7	GDI0.03 036	23.042	404.881	4.14	97.409	29.001	20.14	39439.1	27697.1	0.915845	3.7916	370.808	36120	25366.2
07.20.17	bg													07.20.17
ctrl001	32.268	506.177	4.65	64.122	34.829	21.92	32457.1	14827.4	0.841474	3.91285	425.935	27311.8	12476.9	GDI0.03 007	31.929	252.127	3.04	121.696	39.122	23.82	30682.8	20819.1	0.774354	2.35404	195.236	23759.4	16121.4
ctrl002	22.091	252.94	2.72	65.104	27.762	20.64	16467.4	9445.29	0.893658	2.43075	226.042	14716.2	8440.86	GDI0.03 008	34.62	476.384	4.04	120.572	37.48	28.29	57438.6	39583.7	0.652001	2.63408	310.603	37450	25808.6
ctrl006	27.403	334.075	3.2	73.512	29.773	17.81	24558.5	14612.1	1.03566	3.31411	345.988	25434.3	15133.2	GDI0.03 009	36.639	289.941	3.26	103.085	45.013	21.31	29888.6	16837.5	0.865561	2.82173	250.962	25870.4	14573.8
09.15.17	bg													09.19.17
ctrl002	40.051	240.45	3.1	77.998	43.081	13.33	18754.6	8395.79	1.38373	4.28956	332.718	25951.3	11617.5	GDI0.03 007	32.879	204.151	2.32	88.284	38.917	15.36	18023.3	10078.3	1.20085	2.78598	245.155	21643.3	12102.6
ctrl003	27.616	130.482	1.98	78.552	33.185	7.24	10249.6	5919.58	2.54767	5.04438	332.425	26112.6	15081.1	GDI0.03 009	31.451	200.233	3.17	104.998	37.41	11.45	21024.1	13533.3	1.61093	5.10664	322.561	33868.2	21801.2
ctrl011	31.829	194.134	3.2	78.305	38.722	15.14	15201.7	7684.41	1.2183	3.89857	236.514	18520.2	9361.94	GDI0.03 010	36.708	303.621	3.71	144.122	41.511	16.89	43758.5	31154.9	1.09207	4.05159	331.576	47787.4	34023.4
average	29.2907	313.232	3.34778	74.0202	32.8953	18.2902	22653.2	12616.5	1.15242	3.55418	314.183	23068.9	12745.3		31.8698	279.465	3.32222	107.218	37.2107	18.6	30610.9	20257.8	1.06471	3.45677	276.659	29901.5	19680.4
std dev	5.15033	129.322	0.845085	7.631	5.48999	5.66926	8045.55	4937.05	0.563682	0.834683	66.3407	4223.31	2623.22		4.35803	104.671	0.615991	18.2932	4.85766	5.29777	14093.9	10499.7	0.300129	0.885261	61.2261	9459.63	7545.62
					average wound width:		18.4451	<<normalize wound width to this value

## Sheet: QQ OE Rho activity
07.13.17	bg	area	zone width	ring intensity	bg intensity	wound width	total activity (area*ring int)	area*ring int corr	normalization factor	norm zone width	norm zone area	norm total activity	corr norm total activity	07.13.17	bg	area	zone width	ring intensity	bg intensity	wound width	total activity (area*ring int)	area*ring int corr	normalization factor	norm zone width	norm zone area	norm total activity	corr norm total activity
ctrl001	16.054	400.519	4.56	37.519	12.915	22.032	15027.1	9854.37	0.837196	3.81762	335.313	12580.6	8250.04	GDI0.03 033	14.129	80.799	1.65	37.468	14.277	13.62	3027.38	1873.81	1.35427	2.23454	109.423	4099.88	2537.64
ctrl002	24.152	324.6	2.77	60.29	17.794	26.28	19570.1	13794.2	0.701869	1.94418	227.827	13735.7	9681.72	GDI0.03 035	14.033	140.381	1.65	36.463	14.17	16.52	5118.71	3129.51	1.11653	1.84228	156.74	5715.21	3494.2
ctrl003	20.213	133.839	2.08	46.54	18.388	20.22	6228.87	3767.84	0.912221	1.89742	122.091	5682.1	3437.1	GDI0.03 036	19.801	186.214	2.34	47.126	19.697	20.14	8775.52	5107.66	0.915845	2.14308	170.543	8037.01	4677.83
07.20.17	bg													07.20.17
ctrl001	23.482	164.413	2.32	69.514	21.6	21.92	11429	7877.68	0.841474	1.95222	138.349	9617.21	6628.87	GDI0.03 007	28.533	189.659	1.65	80.986	27.896	23.82	15359.7	10069	0.774354	1.27768	146.863	11893.9	7796.97
ctrl002	25.942	156.947	1.89	79.924	24.421	20.64	12543.8	8711.03	0.893658	1.68901	140.257	11209.9	7784.69	GDI0.03 008	35.083	234.828	2.8	90.917	31.308	28.29	21349.9	13997.9	0.652001	1.8256	153.108	13920.1	9126.62
ctrl006	24.92	164.487	2.6	64.311	23.116	17.81	10578.3	6776.04	1.03566	2.69272	170.353	10955.6	7017.68	GDI0.03 009	27.687	152.807	1.23	76.542	28.35	21.31	11696.2	7364.07	0.865561	1.06464	132.264	10123.7	6374.06
09.15.17	bg													09.19.17
ctrl002	43.119	154.435	2.51	114.238	43.381	13.33	17642.3	10942.8	1.38373	3.47316	213.696	24412.2	15141.9	GDI0.03 007	25.653	136.138	1.5	63.141	20.586	15.36	8595.89	5793.35	1.20085	1.80128	163.482	10322.4	6956.97
ctrl003	21.865	58.033	1.17	81.658	22.828	7.24	4738.86	3414.08	2.54767	2.98077	147.849	12073	8697.94	GDI0.03 009	26.954	116.658	2.12	78.358	26.406	11.45	9141.09	6060.62	1.61093	3.41516	187.927	14725.6	9763.21
ctrl011	32.624	108.415	1.92	103.195	38.196	15.14	11187.9	7046.87	1.2183	2.33914	132.082	13630.2	8585.22	GDI0.03 010	29.531	196.278	1.98	97.138	22.559	16.89	19066.1	14638.2	1.09207	2.1623	214.35	20821.5	15986
average	25.819	185.076	2.42444	73.021	24.7377	18.2902	12105.1	8020.55	1.15242	2.5318	180.869	12655.2	8358.35		24.6004	159.307	1.88	67.571	22.8054	18.6	11347.8	7559.35	1.06471	1.97406	159.411	11073.3	7412.61
std dev	7.88256	107.881	0.932833	24.8582	9.83127	5.66926	4841.74	3307.88	0.563682	0.758123	68.5828	5043.83	3108.1		7.16057	46.951	0.481041	22.6593	6.16307	5.29777	6153.45	4489.23	0.300129	0.669877	30.4385	5064.18	4031.1
					average wound width:		18.4451	<<normalize wound width to this value
